# Supplementary material
Source: MDPI journal article supplement (https://www.mdpi.com/2410-3888/9/3/92)
Supplement: s1 [file s1]

Archive with 4 entries (4 files):
- Table S2.xls
- table S3.xlsx
- Figure S1.pdf
- Table S1.pdf
