# Supplementary material
Source: MDPI journal article supplement (https://www.mdpi.com/2410-3888/9/3/92)
Supplement: s1 [file s1 › Table S1.pdf]

**Table S1.** Quality of heart transcriptome in thermal stress group (35 °C) (TSG) and the control group (25 °C) (CG).

| <b>Treatment</b> | <b>Raw<br/>Reads<br/>(M)</b> | <b>Clean<br/>Reads<br/>(M)</b> | <b>Clean<br/>Data<br/>(G)</b> | <b>Q20<br/>(%)</b> | <b>Q30<br/>(%)</b> | <b>GC<br/>percentage<br/>(%)</b> |
|------------------|------------------------------|--------------------------------|-------------------------------|--------------------|--------------------|----------------------------------|
| CG1              | 37739232                     | 37336290                       | 5576273718                    | 96.93              | 91.90              | 39.42                            |
| CG2              | 40688798                     | 40316948                       | 6022836398                    | 97.18              | 92.48              | 40.31                            |
| CG3              | 44844662                     | 44510572                       | 6651632391                    | 96.85              | 91.67              | 38.54                            |
| CG4              | 47721246                     | 47353040                       | 7080497194                    | 96.82              | 91.68              | 41.50                            |
| CG5              | 42267436                     | 42000310                       | 6273802875                    | 97.13              | 92.28              | 41.65                            |
| TSG1             | 44149150                     | 43791428                       | 6536141490                    | 97.08              | 92.33              | 42.67                            |
| TSG2             | 55735458                     | 55487070                       | 8283779447                    | 97.56              | 93.07              | 43.32                            |
| TSG3             | 39262404                     | 39129418                       | 5840460559                    | 98.14              | 94.31              | 40.21                            |
| TSG4             | 39478918                     | 39306088                       | 5864705086                    | 97.69              | 93.34              | 43.01                            |
| TSG5             | 38695312                     | 38520794                       | 5750809263                    | 97.46              | 92.83              | 43.95                            |
