# Supplementary material
Source: MDPI journal article supplement (https://www.mdpi.com/2410-3888/9/3/92)
Supplement: s1 [file s1 › Table S2.xls]

Table S2 DEGs identified between thermal stress group (35 ��C) and the control group (25 ��C)
id	TA1_count	TA2_count	TA3_count	TA4_count	TA5_count	TC1_count	TC2_count	TC3_count	TC4_count	TC5_count	TA1_fpkm	TA2_fpkm	TA3_fpkm	TA4_fpkm	TA5_fpkm	TC1_fpkm	TC2_fpkm	TC3_fpkm	TC4_fpkm	TC5_fpkm	TA_mean	TC_mean	log2(fc)	PValue	FDR	Symbol	Description	KEGG_A_class	KEGG_B_class	Pathway	K_ID	GO Component	GO Function	GO Process	TF_family
Unigene0011149	0	0	0	0	0	5	410	245	2	1	0	0	0	0	0	1.06	66.74	67.66	0.49	0.23	0.001	27.236	14.73322722	8.44E-05	0.001192649	--	-	-	-	-	-	-	-	-	--
Unigene0000152	0	0	0	0	0	412	48	270	158	52	0	0	0	0	0	41.57	3.71	35.4	18.4	5.59	0.001	20.934	14.35356038	2.06E-12	1.25E-10	--	-	-	-	-	-	-	-	-	--
Unigene0029871	0	2	39	10	13	88415	128088	100321	77351	55446	0	0.25	5.07	1.02	1.47	8322.22	9234.12	12270.5	8404.16	5559.7	1.562	8758.14	12.45301434	4.14E-44	4.21E-41	--	XP_045111780.1 uncharacterized protein LOC123504921 [Portunus trituberculatus]	-	-	-	-	-	-	-	--
Unigene0025776	0	0	0	0	0	283	732	10	436	2	0	0	0	0	0	5.65	11.18	0.26	10.04	0.04	0.001	5.434	12.40779885	2.16E-07	5.57E-06	--	-	-	-	-	-	-	-	-	--
Unigene0031162	0	0	0	0	0	96	25	25	39	97	0	0	0	0	0	7.84	1.56	2.65	3.68	8.44	0.001	4.834	12.23900176	2.01E-12	1.23E-10	--	-	-	-	-	-	GO:0005845//mRNA cap binding complex	GO:0003676//nucleic acid binding;GO:0008270//zinc ion binding	GO:0006413//translational initiation;GO:0017148//negative regulation of translation	--
Unigene0026223	0	0	0	0	0	18	0	4	29	2	0	0	0	0	0	7.26	0	2.1	13.5	0.86	0.001	4.744	12.21188829	0.000860707	0.008889633	--	-	-	-	-	-	-	-	-	--
Unigene0031070	0	0	0	0	0	111	180	1	151	0	0	0	0	0	0	6.09	7.57	0.07	9.57	0	0.001	4.66	12.18611424	0.000716158	0.007578971	--	-	-	-	-	-	-	-	-	--
Unigene0022114	0	0	0	0	0	14	39	12	6	0	0	0	0	0	0	4.35	9.29	4.85	2.15	0	0.001	4.128	12.01122726	0.000128559	0.001722971	--	-	-	-	-	-	-	-	-	--
Unigene0022953	0	0	0	0	0	12	5	60	3	18	0	0	0	0	0	1.88	0.6	12.21	0.54	3	0.001	3.646	11.83209885	2.97E-06	6.13E-05	--	-	-	-	-	-	-	-	-	--
Unigene0007975	0	0	0	0	0	77	25	32	6	8	0	0	0	0	0	8.77	2.18	4.73	0.79	0.97	0.001	3.488	11.76818432	4.20E-08	1.24E-06	--	-	-	-	-	-	-	-	-	--
Unigene0029873	2	0	23	9	8	46020	39996	40481	22255	24393	0.25	0	2.59	0.8	0.78	3755.91	2500.11	4293.16	2096.58	2120.81	0.884	2953.314	11.70600076	8.49E-48	1.04E-44	--	XP_045111780.1 uncharacterized protein LOC123504921 [Portunus trituberculatus]	-	-	-	-	-	-	-	--
Unigene0010671	0	0	0	0	0	53	99	4	13	1	0	0	0	0	0	5.01	7.17	0.49	1.42	0.1	0.001	2.838	11.47065887	1.01E-06	2.28E-05	--	-	-	-	-	-	-	-	-	--
Unigene0020273	0	0	0	0	0	5	9	8	5	3	0	0	0	0	0	2.23	3.07	4.63	2.57	1.42	0.001	2.784	11.4429435	0.000834701	0.008657526	--	-	-	-	-	-	-	-	-	--
Unigene0018535	0	0	0	0	0	12	13	8	6	11	0	0	0	0	0	2.91	2.41	2.52	1.68	2.84	0.001	2.472	11.27146303	1.12E-05	0.000201115	--	-	-	-	-	-	-	-	-	--
Unigene0003886	0	0	0	0	0	41	42	64	13	17	0	0	0	0	0	2.67	2.09	5.41	0.98	1.18	0.001	2.466	11.26795708	3.53E-10	1.48E-08	--	-	-	-	-	-	-	-	-	--
Unigene0035034	0	0	0	0	0	17	0	19	3	1	0	0	0	0	0	4.38	0	6.35	0.89	0.27	0.001	2.378	11.215533	0.003128264	0.026361459	--	-	-	-	-	-	-	-	-	--
Unigene0009850	0	0	0	0	0	6	5	13	17	2	0	0	0	0	0	1.15	0.73	3.23	3.75	0.41	0.001	1.854	10.85642553	0.000187251	0.002391694	--	-	-	-	-	-	-	-	-	--
Unigene0044325	0	0	0	0	0	24	10	75	0	7	0	0	0	0	0	1.62	0.52	6.59	0	0.5	0.001	1.846	10.85018684	0.002114681	0.019070131	CYP2D6	XP_045115732.1 cytochrome P450 2U1-like [Portunus trituberculatus]	Metabolism;Metabolism;Metabolism	Global and overview maps;Lipid metabolism;Lipid metabolism	ko01100//Metabolic pathways;ko00071//Fatty acid degradation;ko00590//Arachidonic acid metabolism	K07422;K07422;K07422	-	GO:0005506//iron ion binding;GO:0016705//oxidoreductase activity, acting on paired donors, with incorporation or reduction of molecular oxygen;GO:0020037//heme binding	-	--
Unigene0001352	0	0	0	0	0	53	11	14	10	2	0	0	0	0	0	5.01	0.8	1.72	1.09	0.2	0.001	1.764	10.78463485	4.47E-06	8.87E-05	--	-	-	-	-	-	-	-	-	--
Unigene0029063	0	0	0	0	0	33	0	19	4	4	0	0	0	0	0	3.88	0	2.9	0.54	0.5	0.001	1.564	10.6110248	0.000392331	0.004550859	--	-	-	-	-	-	-	-	-	--
Unigene0046775	0	0	0	0	0	12	9	9	8	0	0	0	0	0	0	2.32	1.34	2.27	1.79	0	0.001	1.544	10.59245704	0.001297334	0.012538593	--	-	-	-	-	-	GO:0030131//clathrin adaptor complex	-	GO:0006886//intracellular protein transport;GO:0016192//vesicle-mediated transport	--
Unigene0001103	0	0	0	0	0	11	1	5	4	4	0	0	0	0	0	3.11	0.22	1.84	1.31	1.21	0.001	1.538	10.58683979	0.004424112	0.035183388	--	XP_045111446.1 uncharacterized protein LOC123504743 [Portunus trituberculatus]	-	-	-	-	-	-	-	--
Unigene0043857	0	0	0	0	0	21	2	11	15	2	0	0	0	0	0	2.85	0.21	1.94	2.35	0.29	0.001	1.528	10.57742883	0.000135382	0.001805119	--	-	-	-	-	-	-	-	-	--
Unigene0010759	0	0	0	0	0	11	2	10	4	15	0	0	0	0	0	1.81	0.25	2.14	0.76	2.63	0.001	1.518	10.56795608	0.000203572	0.00256802	--	-	-	-	-	-	-	-	GO:0007276//gamete generation	--
Unigene0019185	0	0	0	0	0	13	5	20	0	6	0	0	0	0	0	1.91	0.56	3.83	0	0.94	0.001	1.448	10.49984589	0.000911469	0.009319416	--	-	-	-	-	-	-	-	-	--
Unigene0002621	0	0	0	0	0	6	2	2	5	14	0	0	0	0	0	1.41	0.36	0.61	1.35	3.49	0.001	1.444	10.49585503	0.002484968	0.021777585	--	-	-	-	-	-	-	-	-	--
Unigene0012953	0	0	0	0	0	31	10	13	0	1	0	0	0	0	0	3.8	0.94	2.07	0	0.13	0.001	1.388	10.43879185	0.000968281	0.009820495	--	-	-	-	-	-	-	-	-	--
Unigene0028427	0	0	0	0	0	12	6	7	2	1	0	0	0	0	0	2.86	1.1	2.17	0.55	0.25	0.001	1.386	10.43671154	0.003451658	0.028630886	--	-	-	-	-	-	-	-	-	--
Unigene0022540	0	0	0	0	0	14	6	11	2	4	0	0	0	0	0	2.44	0.8	2.49	0.4	0.74	0.001	1.374	10.42416629	0.000448641	0.00510879	--	-	-	-	-	-	-	-	-	--
Unigene0040230	8	9	36	10	9	28081	36497	26454	17061	17034	0.46	0.45	1.86	0.41	0.4	1049.7	1044.92	1284.99	736.16	678.32	0.716	958.818	10.38708169	2.01E-139	2.79E-135	HSPA8	QEJ88143.1 heat shock protein 70, partial [Macrophthalmus japonicus]	Cellular Processes;Genetic Information Processing;Environmental Information Processing;Genetic Information Processing;Organismal Systems	Transport and catabolism;Folding, sorting and degradation;Signal transduction;Transcription;Aging	ko04144//Endocytosis;ko04141//Protein processing in endoplasmic reticulum;ko04010//MAPK signaling pathway;ko03040//Spliceosome;ko04213//Longevity regulating pathway - multiple species	K03283;K03283;K03283;K03283;K03283	GO:0000228//nuclear chromosome;GO:0000785//chromatin;GO:0005575//cellular_component;GO:0005622//intracellular anatomical structure;GO:0005634//nucleus;GO:0005694//chromosome;GO:0005726//perichromatin fibrils;GO:0005737//cytoplasm;GO:0005739//mitochondrion;GO:0005829//cytosol;GO:0016020//membrane;GO:0016021//integral component of membrane;GO:0031224//intrinsic component of membrane;GO:0031974//mem…	GO:0000166//nucleotide binding;GO:0003674//molecular_function;GO:0003824//catalytic activity;GO:0004856//xylulokinase activity;GO:0005488//binding;GO:0005515//protein binding;GO:0005524//ATP binding;GO:0016462//pyrophosphatase activity;GO:0016773//phosphotransferase activity, alcohol group as acceptor;GO:0016787//hydrolase activity;GO:0016817//hydrolase activity, acting on acid anhydrides;GO:0016…	GO:0000003//reproduction;GO:0000375//RNA splicing, via transesterification reactions;GO:0000377//RNA splicing, via transesterification reactions with bulged adenosine as nucleophile;GO:0000398//mRNA splicing, via spliceosome;GO:0000902//cell morphogenesis;GO:0000904//cell morphogenesis involved in differentiation;GO:0001505//regulation of neurotransmitter levels;GO:0001700//embryonic development …	--
Unigene0030103	0	0	0	0	0	34	7	9	2	0	0	0	0	0	0	4.2	0.66	1.45	0.29	0	0.001	1.32	10.36632221	0.001085671	0.010805862	--	-	-	-	-	-	-	GO:0008201//heparin binding	-	--
Unigene0022218	0	0	0	0	0	0	4	41	1	17	0	0	0	0	0	0	0.26	4.47	0.1	1.52	0.001	1.27	10.31061278	0.0006128	0.006664643	Ambp	XP_023211824.1 papilin-like isoform X1 [Centruroides sculpturatus]	-	-	-	-	GO:0005575//cellular_component;GO:0005576//extracellular region;GO:0005615//extracellular space;GO:0005622//intracellular anatomical structure;GO:0005886//plasma membrane;GO:0009986//cell surface;GO:0016020//membrane;GO:0043226//organelle;GO:0043227//membrane-bounded organelle;GO:0043229//intracellular organelle;GO:0043231//intracellular membrane-bounded organelle;GO:0071944//cell periphery	GO:0003674//molecular_function;GO:0003824//catalytic activity;GO:0004180//carboxypeptidase activity;GO:0004185//serine-type carboxypeptidase activity;GO:0004857//enzyme inhibitor activity;GO:0004866//endopeptidase inhibitor activity;GO:0004867//serine-type endopeptidase inhibitor activity;GO:0005246//calcium channel regulator activity;GO:0005488//binding;GO:0005515//protein binding;GO:0008200//io…	GO:0000003//reproduction;GO:0001932//regulation of protein phosphorylation;GO:0001933//negative regulation of protein phosphorylation;GO:0002682//regulation of immune system process;GO:0002683//negative regulation of immune system process;GO:0006464//cellular protein modification process;GO:0006508//proteolysis;GO:0006725//cellular aromatic compound metabolic process;GO:0006778//porphyrin-contain…	--
Unigene0021780	0	0	0	0	0	10	13	10	10	12	0	0	0	0	0	1.11	1.1	1.44	1.28	1.41	0.001	1.268	10.30833903	3.35E-06	6.85E-05	ARG1	XP_045106730.1 arginase, hepatic-like isoform X2 [Portunus trituberculatus]	Metabolism;Metabolism;Metabolism;Metabolism	Global and overview maps;Global and overview maps;Amino acid metabolism;Amino acid metabolism	ko01100//Metabolic pathways;ko01230//Biosynthesis of amino acids;ko00330//Arginine and proline metabolism;ko00220//Arginine biosynthesis	K01476;K01476;K01476;K01476	GO:0005575//cellular_component;GO:0005622//intracellular anatomical structure;GO:0005634//nucleus;GO:0005737//cytoplasm;GO:0005739//mitochondrion;GO:0005829//cytosol;GO:0005937//mating projection;GO:0030427//site of polarized growth;GO:0042995//cell projection;GO:0043226//organelle;GO:0043227//membrane-bounded organelle;GO:0043229//intracellular organelle;GO:0043231//intracellular membrane-bounde…	GO:0003674//molecular_function;GO:0003824//catalytic activity;GO:0004053//arginase activity;GO:0004857//enzyme inhibitor activity;GO:0005488//binding;GO:0008270//zinc ion binding;GO:0008783//agmatinase activity;GO:0016787//hydrolase activity;GO:0016810//hydrolase activity, acting on carbon-nitrogen (but not peptide) bonds;GO:0016813//hydrolase activity, acting on carbon-nitrogen (but not peptide)…	GO:0000050//urea cycle;GO:0006082//organic acid metabolic process;GO:0006520//cellular amino acid metabolic process;GO:0006521//regulation of cellular amino acid metabolic process;GO:0006525//arginine metabolic process;GO:0006527//arginine catabolic process;GO:0006591//ornithine metabolic process;GO:0006807//nitrogen compound metabolic process;GO:0008150//biological_process;GO:0008152//metabolic …	--
Unigene0017990	0	0	0	0	0	2	14	18	9	8	0	0	0	0	0	0.23	1.21	2.63	1.17	0.96	0.001	1.24	10.27612441	4.84E-05	0.000729991	--	-	-	-	-	-	-	-	-	--
Unigene0004950	0	0	0	0	0	11	8	11	2	3	0	0	0	0	0	1.75	0.98	2.28	0.37	0.51	0.001	1.178	10.20212382	0.000614634	0.00667984	--	-	-	-	-	-	-	-	-	--
Unigene0042103	0	0	0	0	0	3	4	5	9	4	0	0	0	0	0	0.65	0.66	1.4	2.24	0.92	0.001	1.174	10.19721669	0.002469367	0.021668213	--	KAG7170287.1 LINE-1 reverse transcriptase-like 1 [Homarus americanus]	-	-	-	-	-	-	-	--
Unigene0034759	0	0	0	0	0	4	0	27	5	4	0	0	0	0	0	0.47	0	4.14	0.68	0.5	0.001	1.158	10.17741954	0.00193515	0.017653685	--	XP_018399748.1 PREDICTED: uncharacterized protein LOC108777377 [Cyphomyrmex costatus]	-	-	-	-	-	GO:0004803//transposase activity	GO:0006313//transposition, DNA-mediated;GO:0007099//centriole replication	--
Unigene0013026	0	0	0	0	0	0	4	21	1	10	0	0	0	0	0	0	0.42	3.74	0.16	1.46	0.001	1.156	10.17492568	0.004391534	0.034959607	Apoa1	ALZ42024.1 apolipoprotein A-I [Spodoptera litura]	-	-	-	-	GO:0005575//cellular_component;GO:0005576//extracellular region;GO:0005615//extracellular space;GO:0005622//intracellular anatomical structure;GO:0005634//nucleus;GO:0005737//cytoplasm;GO:0005741//mitochondrial outer membrane;GO:0005768//endosome;GO:0005769//early endosome;GO:0005783//endoplasmic reticulum;GO:0005788//endoplasmic reticulum lumen;GO:0005829//cytosol;GO:0005886//plasma membrane;GO:…	GO:0001540//amyloid-beta binding;GO:0003674//molecular_function;GO:0003924//GTPase activity;GO:0004857//enzyme inhibitor activity;GO:0005102//signaling receptor binding;GO:0005198//structural molecule activity;GO:0005215//transporter activity;GO:0005319//lipid transporter activity;GO:0005488//binding;GO:0005496//steroid binding;GO:0005515//protein binding;GO:0005543//phospholipid binding;GO:00055…	GO:0001523//retinoid metabolic process;GO:0001667//ameboidal-type cell migration;GO:0001817//regulation of cytokine production;GO:0001818//negative regulation of cytokine production;GO:0001932//regulation of protein phosphorylation;GO:0001935//endothelial cell proliferation;GO:0001959//regulation of cytokine-mediated signaling pathway;GO:0001960//negative regulation of cytokine-mediated signaling…	--
Unigene0000908	0	0	0	0	0	4	6	1	15	6	0	0	0	0	0	0.68	0.79	0.22	2.96	1.09	0.001	1.148	10.16490693	0.001583316	0.014887463	--	-	-	-	-	-	-	-	-	--
Unigene0018177	0	0	0	0	0	2	14	1	8	7	0	0	0	0	0	0.37	1.99	0.24	1.71	1.38	0.001	1.138	10.15228484	0.002349253	0.020825175	--	-	-	-	-	-	-	-	-	--
Unigene0009863	0	0	0	0	0	2	7	2	4	18	0	0	0	0	0	0.33	0.89	0.43	0.77	3.19	0.001	1.122	10.13185696	0.001884146	0.017260216	--	-	-	-	-	-	-	-	-	--
Unigene0004721	0	0	0	0	0	5	0	2	21	5	0	0	0	0	0	0.73	0	0.38	3.54	0.78	0.001	1.086	10.08480839	0.005046294	0.039245392	--	-	-	-	-	-	-	-	-	--
Unigene0041129	0	0	0	0	0	15	13	8	10	4	0	0	0	0	0	1.55	1.03	1.08	1.19	0.44	0.001	1.058	10.04712391	2.11E-05	0.000353367	--	-	-	-	-	-	-	-	-	--
Unigene0044869	0	0	0	0	0	2	10	3	13	34	0	0	0	0	0	0.16	0.62	0.32	1.22	2.94	0.001	1.052	10.03891899	6.31E-05	0.000923639	--	-	-	-	-	-	-	-	-	--
Unigene0036778	0	0	0	0	0	12	11	5	2	1	0	0	0	0	0	2.07	1.45	1.12	0.4	0.18	0.001	1.044	10.027906	0.00265303	0.022979688	--	-	-	-	-	-	-	-	-	--
Unigene0029911	0	0	0	0	0	9	30	2	2	0	0	0	0	0	0	1.27	3.25	0.37	0.33	0	0.001	1.044	10.027906	0.005208098	0.040323073	--	-	-	-	-	-	-	-	-	--
Unigene0037245	0	0	0	0	0	8	3	0	10	11	0	0	0	0	0	1.23	0.35	0	1.77	1.8	0.001	1.03	10.00842862	0.004116628	0.033092943	Fdx2	XP_042216461.1 adrenodoxin-like protein 1, mitochondrial isoform X2 [Homarus americanus]	-	-	-	-	-	-	-	--
Unigene0016690	0	0	0	0	0	7	13	11	1	4	0	0	0	0	0	0.94	1.34	1.92	0.16	0.57	0.001	0.986	9.945443836	0.000804217	0.008389391	--	-	-	-	-	-	-	-	-	--
Unigene0029874	0	0	1	0	1	743	412	452	209	439	0	0	0.09	0	0.08	49.93	21.2	39.47	16.21	31.42	0.034	31.646	9.862272695	4.78E-22	8.97E-20	--	XP_045111780.1 uncharacterized protein LOC123504921 [Portunus trituberculatus]	-	-	-	-	-	-	-	--
Unigene0039027	0	0	0	0	0	6	16	3	10	3	0	0	0	0	0	0.75	1.52	0.48	1.43	0.4	0.001	0.916	9.839203788	0.000407211	0.004697306	--	-	-	-	-	-	GO:0030867//rough endoplasmic reticulum membrane	GO:0046983//protein dimerization activity	GO:0006629//lipid metabolic process;GO:0023041//neuronal signal transduction	--
Unigene0008056	0	0	0	0	0	6	5	3	3	6	0	0	0	0	0	1.13	0.72	0.73	0.65	1.2	0.001	0.886	9.791162889	0.003907649	0.031685654	--	-	-	-	-	-	-	-	-	--
Unigene0047201	0	0	0	0	0	14	10	3	13	7	0	0	0	0	0	1.29	0.7	0.36	1.38	0.69	0.001	0.884	9.787902559	4.68E-05	0.00070877	--	-	-	-	-	-	GO:0030667//secretory granule membrane	-	GO:0006887//exocytosis	--
Unigene0010186	0	0	0	0	0	0	3	3	15	11	0	0	0	0	0	0	0.28	0.48	2.11	1.43	0.001	0.86	9.74819285	0.005098694	0.039596794	--	-	-	-	-	-	-	-	-	--
Unigene0033623	0	0	0	0	0	16	12	3	0	4	0	0	0	0	0	1.96	1.13	0.48	0	0.52	0.001	0.818	9.675957033	0.004431188	0.035210716	--	-	-	-	-	-	-	-	-	--
Unigene0016857	0	0	0	0	0	7	25	0	17	1	0	0	0	0	0	0.61	1.67	0	1.71	0.09	0.001	0.816	9.672425342	0.001770351	0.016368971	--	-	-	-	-	-	-	-	-	--
Unigene0040473	0	0	0	0	0	9	6	4	9	4	0	0	0	0	0	1.07	0.55	0.62	1.23	0.51	0.001	0.796	9.636624621	0.000519173	0.005783798	--	-	-	-	-	-	-	-	-	--
Unigene0009072	0	0	0	0	0	3	16	0	6	7	0	0	0	0	0	0.38	1.56	0	0.88	0.95	0.001	0.754	9.558420713	0.006190381	0.046518876	--	KAG7301870.1 hypothetical protein JYU34_013269 [Plutella xylostella]	-	-	-	-	-	-	-	--
Unigene0027201	0	0	0	0	0	27	0	2	10	1	0	0	0	0	0	2.39	0	0.23	1.02	0.09	0.001	0.746	9.54303182	0.004825251	0.037773163	ORF1	-	-	-	-	-	-	GO:0003723//RNA binding;GO:0003968//RNA-directed 5'-3' RNA polymerase activity	GO:0006351//transcription, DNA-templated	--
Unigene0031289	0	0	0	0	0	2	7	6	5	6	0	0	0	0	0	0.27	0.73	1.06	0.78	0.87	0.001	0.742	9.535275377	0.0021084	0.019021721	--	XP_045122250.1 uncharacterized protein LOC123510869 [Portunus trituberculatus]	Environmental Information Processing	Signaling molecules and interaction	ko04080//Neuroactive ligand-receptor interaction	K05206	GO:0005575//cellular_component;GO:0016020//membrane;GO:0016021//integral component of membrane;GO:0031224//intrinsic component of membrane	GO:0003674//molecular_function;GO:0004888//transmembrane signaling receptor activity;GO:0004970//ionotropic glutamate receptor activity;GO:0005215//transporter activity;GO:0005216//ion channel activity;GO:0005230//extracellular ligand-gated ion channel activity;GO:0008066//glutamate receptor activity;GO:0015075//ion transmembrane transporter activity;GO:0015267//channel activity;GO:0015276//ligan…	GO:0003008//system process;GO:0006810//transport;GO:0006811//ion transport;GO:0007154//cell communication;GO:0007165//signal transduction;GO:0007166//cell surface receptor signaling pathway;GO:0007215//glutamate receptor signaling pathway;GO:0007600//sensory perception;GO:0007606//sensory perception of chemical stimulus;GO:0008150//biological_process;GO:0009593//detection of chemical stimulus;GO:…	--
Unigene0020896	0	0	0	0	0	9	21	4	2	6	0	0	0	0	0	0.81	1.44	0.47	0.21	0.57	0.001	0.7	9.451211112	0.000360345	0.004228113	--	XP_045107799.1 uncharacterized protein LOC123502684 [Portunus trituberculatus]	-	-	-	-	-	-	-	--
Unigene0034809	0	0	0	0	0	15	1	4	4	2	0	0	0	0	0	1.87	0.1	0.65	0.58	0.27	0.001	0.694	9.438791853	0.005835492	0.044365527	--	-	-	-	-	-	-	-	-	--
Unigene0035954	0	0	0	0	0	4	12	2	3	3	0	0	0	0	0	0.62	1.42	0.4	0.54	0.49	0.001	0.694	9.438791853	0.006624462	0.049133784	--	-	-	-	-	-	-	-	-	--
Unigene0007185	0	0	0	0	0	4	6	2	4	8	0	0	0	0	0	0.53	0.61	0.34	0.61	1.13	0.001	0.644	9.330916878	0.003884227	0.03156948	--	XP_045134035.1 multiple C2 and transmembrane domain-containing protein-like isoform X15 [Portunus trituberculatus]	-	-	-	-	-	-	-	--
Unigene0010223	0	0	0	0	0	3	6	10	10	3	0	0	0	0	0	0.26	0.4	1.13	1.01	0.28	0.001	0.616	9.266786541	0.00072703	0.00767843	--	-	-	-	-	-	-	-	-	--
Unigene0009996	0	0	0	0	0	3	8	5	2	4	0	0	0	0	0	0.41	0.84	0.89	0.32	0.58	0.001	0.608	9.247927513	0.006352227	0.04750371	--	-	-	-	-	-	-	-	-	--
Unigene0018602	0	0	0	0	0	3	1	7	8	12	0	0	0	0	0	0.23	0.06	0.7	0.71	0.99	0.001	0.538	9.071462363	0.001618424	0.015162806	--	-	-	-	-	-	-	-	-	--
Unigene0008531	0	0	0	0	0	9	4	2	7	3	0	0	0	0	0	0.79	0.27	0.23	0.71	0.28	0.001	0.456	8.832890014	0.003430065	0.028484033	--	-	-	-	-	-	-	-	-	--
Unigene0036807	0	0	0	0	1	184	117	41	55	129	0	0	0	0	0.07	10.74	5.23	3.11	3.71	8.02	0.014	6.162	8.781828045	1.16E-14	9.66E-13	DHCR24	XP_045128680.1 delta(24)-sterol reductase-like [Portunus trituberculatus]	Metabolism;Metabolism	Global and overview maps;Lipid metabolism	ko01100//Metabolic pathways;ko00100//Steroid biosynthesis	K09828;K09828	-	GO:0016491//oxidoreductase activity;GO:0050660//flavin adenine dinucleotide binding	GO:0005975//carbohydrate metabolic process	--
Unigene0029926	0	0	2	3	0	545	1317	16	633	1	0	0	0.02	0.03	0	4.27	7.9	0.16	5.72	0.01	0.01	3.612	8.496654083	7.90E-07	1.83E-05	--	-	-	-	-	-	-	-	-	--
Unigene0037328	2	0	0	3	0	713	75	437	196	192	0.35	0	0	0.38	0	82.08	6.61	65.37	26.05	23.55	0.146	40.732	8.124050475	3.65E-13	2.48E-11	--	-	-	-	-	-	GO:0005887//integral component of plasma membrane	GO:0015171//amino acid transmembrane transporter activity	GO:0006865//amino acid transport	--
Unigene0040813	0	0	1	0	0	21	5	227	15	40	0	0	0.09	0	0	1.38	0.25	19.43	1.14	2.81	0.018	5.002	8.118364341	5.07E-06	9.94E-05	--	XP_045129519.1 uncharacterized protein LOC123515131 [Portunus trituberculatus]	-	-	-	-	-	-	-	--
Unigene0018305	2	1	0	6	0	787	1358	156	286	160	0.08	0.03	0	0.16	0	19.81	26.19	5.1	8.31	4.29	0.054	12.74	7.882190155	4.76E-16	4.79E-14	--	-	-	-	-	-	-	-	-	--
Unigene0009364	0	2	0	0	0	77	215	34	46	270	0	0.22	0	0	0	6.36	13.59	3.65	4.38	23.74	0.044	10.344	7.877074941	1.97E-12	1.21E-10	ARF1	XP_045603659.1 ADP-ribosylation factor-like [Procambarus clarkii]	Cellular Processes	Transport and catabolism	ko04144//Endocytosis	K07937	-	GO:0003924//GTPase activity;GO:0005525//GTP binding;GO:0019001//guanyl nucleotide binding;GO:0031683//G-protein beta/gamma-subunit complex binding	GO:0007186//G protein-coupled receptor signaling pathway	--
Unigene0040229	15	22	36	12	26	13068	4182	4861	3119	2550	0.95	1.22	2.05	0.54	1.29	539.36	132.2	260.71	148.59	112.12	1.21	238.596	7.623418999	1.93E-54	2.78E-51	HSPA8	ANQ44710.1 heat shock protein 70 kDa, partial [Cardisoma armatum]	Cellular Processes;Genetic Information Processing;Environmental Information Processing;Genetic Information Processing;Organismal Systems	Transport and catabolism;Folding, sorting and degradation;Signal transduction;Transcription;Aging	ko04144//Endocytosis;ko04141//Protein processing in endoplasmic reticulum;ko04010//MAPK signaling pathway;ko03040//Spliceosome;ko04213//Longevity regulating pathway - multiple species	K03283;K03283;K03283;K03283;K03283	-	GO:0004856//xylulokinase activity;GO:0005515//protein binding;GO:0005524//ATP binding;GO:0016773//phosphotransferase activity, alcohol group as acceptor;GO:0016787//hydrolase activity;GO:0016887//ATP hydrolysis activity;GO:0051082//unfolded protein binding	GO:0005975//carbohydrate metabolic process;GO:0005997//xylulose metabolic process;GO:0006457//protein folding;GO:0006950//response to stress;GO:0008360//regulation of cell shape;GO:0042732//D-xylose metabolic process;GO:0043093//FtsZ-dependent cytokinesis	--
Unigene0005989	125	97	209	164	175	48589	48384	30495	32836	30148	6.62	4.5	9.94	6.14	7.23	1675	1277.48	1366.04	1306.6	1107.14	6.886	1346.452	7.611280904	6.18E-198	2.58E-193	HSP90AA1	XP_045106637.1 heat shock protein HSP 90-alpha-like [Portunus trituberculatus]	Genetic Information Processing	Folding, sorting and degradation	ko04141//Protein processing in endoplasmic reticulum	K04079	GO:0005575//cellular_component;GO:0005622//intracellular anatomical structure;GO:0005694//chromosome;GO:0005700//polytene chromosome;GO:0005705//polytene chromosome interband;GO:0005737//cytoplasm;GO:0005813//centrosome;GO:0005815//microtubule organizing center;GO:0005856//cytoskeleton;GO:0015630//microtubule cytoskeleton;GO:0032991//protein-containing complex;GO:0043226//organelle;GO:0043228//no…	GO:0000166//nucleotide binding;GO:0003674//molecular_function;GO:0003824//catalytic activity;GO:0005102//signaling receptor binding;GO:0005488//binding;GO:0005515//protein binding;GO:0005524//ATP binding;GO:0008134//transcription factor binding;GO:0016462//pyrophosphatase activity;GO:0016787//hydrolase activity;GO:0016817//hydrolase activity, acting on acid anhydrides;GO:0016818//hydrolase activi…	GO:0000003//reproduction;GO:0000226//microtubule cytoskeleton organization;GO:0000578//embryonic axis specification;GO:0001101//response to acid chemical;GO:0001654//eye development;GO:0001745//compound eye morphogenesis;GO:0001751//compound eye photoreceptor cell differentiation;GO:0001752//compound eye photoreceptor fate commitment;GO:0001754//eye photoreceptor cell differentiation;GO:0002119//…	--
Unigene0042876	0	0	0	1	0	63	106	19	22	15	0	0	0	0.1	0	5.6	7.22	2.2	2.26	1.42	0.02	3.74	7.54689446	2.35E-09	8.56E-08	--	KAG7167752.1 hypothetical protein Hamer_G010139 [Homarus americanus]	-	-	-	-	-	-	-	--
Unigene0036930	0	0	0	2	3	42	148	177	518	58	0	0	0	0.5	0.83	9.72	26.23	53.22	138.34	14.3	0.266	48.362	7.506303852	2.76E-09	9.97E-08	--	-	-	-	-	-	-	-	-	--
Unigene0039802	0	1	0	0	1	161	75	124	28	7	0	0.04	0	0	0.04	4.99	1.78	4.99	1	0.23	0.016	2.598	7.343185715	1.74E-09	6.51E-08	Clca2	XP_045138892.1 calcium-activated chloride channel regulator 2-like [Portunus trituberculatus]	-	-	-	-	-	-	-	--
Unigene0034056	1	1	0	10	0	586	1043	71	121	100	0.05	0.04	0	0.36	0	19.45	26.52	3.06	4.64	3.54	0.09	11.442	6.990198533	3.21E-09	1.15E-07	--	-	-	-	-	-	-	-	-	--
Unigene0042895	0	1	1	4	0	19	884	6	82	9	0	0.02	0.03	0.08	0	0.35	12.37	0.14	1.73	0.18	0.026	2.954	6.828014393	1.63E-05	0.000281927	--	KAG0707007.1 hypothetical protein GWK47_024192 [Chionoecetes opilio]	-	-	-	-	-	-	-	--
Unigene0015200	0	0	0	1	0	4	89	1	10	9	0	0	0	0.07	0	0.27	4.62	0.09	0.78	0.65	0.014	1.282	6.516825625	9.50E-05	0.001319924	--	XP_037788763.1 uncharacterized protein LOC119584300 isoform X2 [Penaeus monodon]	-	-	-	-	-	-	-	--
Unigene0008802	0	0	0	0	1	56	18	17	7	3	0	0	0	0	0.08	3.96	0.97	1.56	0.57	0.23	0.016	1.458	6.509775004	9.27E-06	0.000170039	--	XP_045103020.1 nose resistant to fluoxetine protein 6-like [Portunus trituberculatus]	-	-	-	-	-	-	-	--
Unigene0011961	1	3	0	3	1	153	65	182	211	135	0.3	0.78	0	0.63	0.23	29.45	9.58	45.53	46.88	27.68	0.388	31.824	6.357914719	1.69E-18	2.34E-16	--	-	-	-	-	-	-	-	-	--
Unigene0036697	0	0	0	0	2	6	139	0	3	66	0	0	0	0	0.23	0.58	10.32	0	0.34	6.82	0.046	3.612	6.295020221	0.004620927	0.036489115	--	-	-	-	-	-	-	-	-	--
Unigene0021940	3	14	1	5	4	2178	37	68	148	266	0.84	3.44	0.25	0.99	0.87	397.28	5.17	16.12	31.16	51.69	1.278	100.284	6.2940598	1.64E-07	4.32E-06	--	-	-	-	-	-	-	-	-	--
Unigene0019301	0	1	0	0	1	50	13	38	14	62	0	0.09	0	0	0.08	3.41	0.68	3.37	1.1	4.5	0.034	2.612	6.26347634	1.32E-07	3.55E-06	--	-	-	-	-	-	-	-	-	--
Unigene0004720	18	15	5	34	58	2257	2692	1894	1735	2425	1.39	1.02	0.35	1.86	3.5	113.68	103.85	123.97	100.87	130.12	1.624	114.498	6.139626955	2.84E-45	3.20E-42	Csad	XP_045115224.1 cysteine sulfinic acid decarboxylase-like [Portunus trituberculatus]	Metabolism;Metabolism;Metabolism;Metabolism	Global and overview maps;Metabolism of other amino acids;Metabolism of cofactors and vitamins;Metabolism of other amino acids	ko01100//Metabolic pathways;ko00410//beta-Alanine metabolism;ko00770//Pantothenate and CoA biosynthesis;ko00430//Taurine and hypotaurine metabolism	K18966;K18966;K18966;K18966	-	GO:0004351//glutamate decarboxylase activity;GO:0004837//tyrosine decarboxylase activity;GO:0016829//lyase activity;GO:0016831//carboxy-lyase activity;GO:0030170//pyridoxal phosphate binding	GO:0006520//cellular amino acid metabolic process;GO:0006540//glutamate decarboxylation to succinate;GO:0006572//tyrosine catabolic process;GO:0015940//pantothenate biosynthetic process;GO:0019752//carboxylic acid metabolic process	--
Unigene0023499	0	8	0	5	1	150	32	17	30	926	0	0.27	0	0.14	0.03	3.8	0.62	0.56	0.88	24.98	0.088	6.168	6.131155431	4.77E-05	0.000720368	--	RMX36720.1 hypothetical protein pdam_00025450, partial [Pocillopora damicornis]	-	-	-	-	GO:0005742//mitochondrial outer membrane translocase complex	GO:0003677//DNA binding;GO:0009009//site-specific recombinase activity	GO:0006310//DNA recombination;GO:0006605//protein targeting;GO:0006886//intracellular protein transport;GO:0015074//DNA integration	--
Unigene0038777	1	0	0	0	0	41	38	0	17	10	0.09	0	0	0	0	2.53	1.79	0	1.21	0.66	0.018	1.238	6.103870598	3.24E-05	0.000514125	--	-	-	-	-	-	-	-	-	--
Unigene0028551	10	8	8	13	5	297	393	2176	287	41	2.47	1.73	1.78	2.27	0.96	47.77	48.42	454.83	53.29	7.03	1.842	122.268	6.052629999	1.39E-09	5.27E-08	--	XP_045134419.1 uncharacterized protein LOC123517982 [Portunus trituberculatus]	-	-	-	-	GO:0005576//extracellular region;GO:0016020//membrane	GO:0008047//enzyme activator activity	GO:0007586//digestion;GO:0016042//lipid catabolic process	--
Unigene0009174	32	27	39	59	37	5251	5547	2679	1375	1572	2.32	1.71	2.54	3.02	2.09	247.63	200.35	164.17	74.85	78.97	2.336	153.194	6.035175709	6.91E-58	1.03E-54	CHORD	XP_045132805.1 cysteine and histidine-rich domain-containing protein-like isoform X1 [Portunus trituberculatus]	-	-	-	-	-	GO:0000166//nucleotide binding;GO:0003674//molecular_function;GO:0005488//binding;GO:0005515//protein binding;GO:0005524//ATP binding;GO:0008270//zinc ion binding;GO:0017076//purine nucleotide binding;GO:0030554//adenyl nucleotide binding;GO:0031072//heat shock protein binding;GO:0032553//ribonucleotide binding;GO:0032555//purine ribonucleotide binding;GO:0032559//adenyl ribonucleotide binding;GO…	GO:0000226//microtubule cytoskeleton organization;GO:0001932//regulation of protein phosphorylation;GO:0001933//negative regulation of protein phosphorylation;GO:0006457//protein folding;GO:0006469//negative regulation of protein kinase activity;GO:0006996//organelle organization;GO:0007010//cytoskeleton organization;GO:0007017//microtubule-based process;GO:0007049//cell cycle;GO:0007098//centros…	--
Unigene0038961	0	0	0	0	1	13	19	22	9	8	0	0	0	0	0.14	1.55	1.73	3.4	1.24	1.01	0.028	1.786	5.995161443	8.08E-06	0.000149967	--	-	-	-	-	-	-	-	-	--
Unigene0007343	0	0	0	0	1	25	17	22	2	5	0	0	0	0	0.13	2.79	1.45	3.19	0.26	0.59	0.026	1.656	5.993047239	5.72E-05	0.000844815	--	-	-	-	-	-	-	-	-	--
Unigene0038617	0	0	0	1	0	10	0	1	45	3	0	0	0	0.19	0	1.77	0	0.23	9.19	0.57	0.038	2.352	5.951744831	0.002366946	0.020950998	--	-	-	-	-	-	-	-	-	--
Unigene0009772	0	1	0	0	0	1	0	44	2	15	0	0.22	0	0	0	0.16	0	9.36	0.38	2.62	0.044	2.504	5.830587228	0.00181388	0.016712092	Ttr	-	-	-	-	-	GO:0000323//lytic vacuole;GO:0005575//cellular_component;GO:0005576//extracellular region;GO:0005615//extracellular space;GO:0005622//intracellular anatomical structure;GO:0005737//cytoplasm;GO:0005764//lysosome;GO:0005766//primary lysosome;GO:0005773//vacuole;GO:0005775//vacuolar lumen;GO:0012505//endomembrane system;GO:0030135//coated vesicle;GO:0030136//clathrin-coated vesicle;GO:0030141//secr…	GO:0003674//molecular_function;GO:0005102//signaling receptor binding;GO:0005179//hormone activity;GO:0005488//binding;GO:0005515//protein binding;GO:0019904//protein domain specific binding;GO:0030545//signaling receptor regulator activity;GO:0036094//small molecule binding;GO:0042562//hormone binding;GO:0042802//identical protein binding;GO:0046982//protein heterodimerization activity;GO:004698…	GO:0000003//reproduction;GO:0001523//retinoid metabolic process;GO:0001555//oocyte growth;GO:0001775//cell activation;GO:0002252//immune effector process;GO:0002263//cell activation involved in immune response;GO:0002274//myeloid leukocyte activation;GO:0002275//myeloid cell activation involved in immune response;GO:0002283//neutrophil activation involved in immune response;GO:0002366//leukocyte …	--
Unigene0037295	1	0	0	0	2	72	84	13	13	32	0.09	0	0	0	0.14	4.35	3.89	1.02	0.91	2.06	0.046	2.446	5.732646732	2.13E-07	5.49E-06	--	-	-	-	-	-	-	-	-	--
Unigene0012923	0	1	0	0	0	26	11	19	4	7	0	0.29	0	0	0	5.53	1.79	5.25	0.98	1.58	0.058	3.026	5.705215277	3.67E-05	0.000571892	--	-	-	-	-	-	GO:0009288//bacterial-type flagellum	-	GO:0001539//cilium or flagellum-dependent cell motility	--
Unigene0039116	0	0	0	1	0	25	20	9	1	3	0	0	0	0.1	0	2.29	1.41	1.07	0.11	0.29	0.02	1.034	5.692092375	0.000469801	0.005301835	--	XP_045118726.1 uncharacterized protein LOC123508845 [Portunus trituberculatus]	-	-	-	-	-	-	-	--
Unigene0028534	4	3	0	0	0	165	75	116	36	87	0.44	0.29	0	0	0	11.85	4.13	10.83	2.98	6.66	0.146	7.29	5.64187854	5.18E-13	3.40E-11	--	XP_045130755.1 uncharacterized protein LOC123515920 isoform X2 [Portunus trituberculatus]	-	-	-	-	-	-	-	--
Unigene0043854	0	0	0	1	0	15	4	11	1	19	0	0	0	0.24	0	3.31	0.68	3.15	0.25	4.46	0.048	2.37	5.625708843	0.000574719	0.006314778	--	-	-	-	-	-	-	-	-	--
Unigene0016829	0	0	0	1	0	2	3	14	27	0	0	0	0	0.21	0	0.38	0.44	3.48	5.96	0	0.042	2.052	5.610497593	0.003250139	0.027233868	--	-	-	-	-	-	-	-	-	--
Unigene0042079	39	31	49	32	24	2373	3047	1493	2084	1863	5.83	4.06	6.58	3.39	2.8	231	227.18	188.86	234.17	193.2	4.532	214.882	5.567252966	4.58E-106	3.82E-102	--	-	-	-	-	-	-	-	-	--
Unigene0001776	5	2	8	2	0	24	1047	90	68	75	0.18	0.06	0.26	0.05	0	0.57	18.91	2.76	1.85	1.88	0.11	5.194	5.561270585	2.69E-06	5.59E-05	ZBED5	XP_045109127.1 zinc finger BED domain-containing protein 5-like [Portunus trituberculatus]	-	-	-	-	-	GO:0003677//DNA binding;GO:0046983//protein dimerization activity	-	zf-BED
Unigene0003887	0	0	1	0	3	70	66	71	9	13	0	0	0.08	0	0.2	3.86	2.79	5.09	0.57	0.76	0.056	2.614	5.544688504	3.04E-07	7.57E-06	Slc7a9	KAG7154343.1 b(0 +)-type amino acid transporter 1-like [Homarus americanus]	-	-	-	-	GO:0005575//cellular_component;GO:0005886//plasma membrane;GO:0005887//integral component of plasma membrane;GO:0005903//brush border;GO:0016020//membrane;GO:0016021//integral component of membrane;GO:0016324//apical plasma membrane;GO:0031224//intrinsic component of membrane;GO:0031226//intrinsic component of plasma membrane;GO:0031253//cell projection membrane;GO:0031526//brush border membrane;…	GO:0000099//sulfur amino acid transmembrane transporter activity;GO:0003674//molecular_function;GO:0003823//antigen binding;GO:0005215//transporter activity;GO:0005342//organic acid transmembrane transporter activity;GO:0005488//binding;GO:0008509//anion transmembrane transporter activity;GO:0008514//organic anion transmembrane transporter activity;GO:0015075//ion transmembrane transporter activi…	GO:0000101//sulfur amino acid transport;GO:0002376//immune system process;GO:0003333//amino acid transmembrane transport;GO:0006810//transport;GO:0006811//ion transport;GO:0006820//anion transport;GO:0006865//amino acid transport;GO:0006928//movement of cell or subcellular component;GO:0008150//biological_process;GO:0009987//cellular process;GO:0015711//organic anion transport;GO:0015804//neutral…	--
Unigene0035609	1	0	1	0	0	31	58	3	29	22	0.19	0	0.17	0	0	3.75	5.38	0.47	4.05	2.84	0.072	3.298	5.517450682	1.99E-06	4.25E-05	SLC5A3	XP_045128349.1 sodium/glucose cotransporter 5-like isoform X1 [Portunus trituberculatus]	-	-	-	-	GO:0005575//cellular_component;GO:0005886//plasma membrane;GO:0005887//integral component of plasma membrane;GO:0016020//membrane;GO:0016021//integral component of membrane;GO:0031224//intrinsic component of membrane;GO:0031226//intrinsic component of plasma membrane;GO:0071944//cell periphery	GO:0003674//molecular_function;GO:0005215//transporter activity;GO:0005298//proline:sodium symporter activity;GO:0005365//myo-inositol transmembrane transporter activity;GO:0005367//myo-inositol:sodium symporter activity;GO:0008324//cation transmembrane transporter activity;GO:0015075//ion transmembrane transporter activity;GO:0015081//sodium ion transmembrane transporter activity;GO:0015166//pol…	GO:0005975//carbohydrate metabolic process;GO:0006020//inositol metabolic process;GO:0006066//alcohol metabolic process;GO:0006810//transport;GO:0006811//ion transport;GO:0006812//cation transport;GO:0006814//sodium ion transport;GO:0007275//multicellular organism development;GO:0007399//nervous system development;GO:0007422//peripheral nervous system development;GO:0008150//biological_process;GO…	--
Unigene0036093	0	1	0	0	0	6	16	11	6	20	0	0.14	0	0	0	0.62	1.27	1.48	0.72	2.2	0.028	1.258	5.489561285	4.47E-05	0.000681408	--	-	-	-	-	-	-	-	-	--
Unigene0037716	2	0	0	0	0	0	80	11	11	43	0.13	0	0	0	0	0	2.64	0.62	0.55	1.97	0.026	1.156	5.474485964	0.00011201	0.001525224	--	XP_045541468.1 uncharacterized protein LOC106719902 [Papilio machaon]	-	-	-	-	-	GO:0003964//RNA-directed DNA polymerase activity	GO:0000373//Group II intron splicing	--
Unigene0035482	11	9	9	18	17	1296	436	916	441	196	0.89	0.64	0.65	1.03	1.07	68.09	17.54	62.54	26.74	10.97	0.856	37.176	5.440616943	9.57E-25	2.26E-22	--	KAG0719387.1 hypothetical protein GWK47_050573 [Chionoecetes opilio]	-	-	-	-	-	GO:0043565//sequence-specific DNA binding	GO:0006355//regulation of transcription, DNA-templated	--
Unigene0027158	0	0	0	0	2	18	5	40	23	3	0	0	0	0	0.29	2.16	0.46	6.24	3.19	0.38	0.058	2.486	5.421629586	0.000113005	0.001535761	--	-	-	-	-	-	-	-	-	--
Unigene0004621	0	0	0	0	1	32	23	2	0	1	0	0	0	0	0.1	2.55	1.4	0.21	0	0.08	0.02	0.848	5.40599236	0.00393818	0.031883568	--	-	-	-	-	-	-	-	-	--
Unigene0045265	1	4	0	1	0	87	101	37	26	92	0.1	0.35	0	0.07	0	5.62	4.99	3.1	1.94	6.33	0.104	4.396	5.401535953	5.68E-12	3.20E-10	--	-	-	-	-	-	-	-	-	--
Unigene0022198	1	0	0	0	0	0	9	36	3	6	0.11	0	0	0	0	0	0.5	3.4	0.25	0.46	0.022	0.922	5.389191322	0.001513032	0.014313837	Mtnd5	RWS30320.1 NADH dehydrogenase subunit 5 (mitochondrion)-like protein [Leptotrombidium deliense]	Metabolism;Metabolism	Global and overview maps;Energy metabolism	ko01100//Metabolic pathways;ko00190//Oxidative phosphorylation	K03883;K03883	GO:0005575//cellular_component;GO:0005622//intracellular anatomical structure;GO:0005737//cytoplasm;GO:0005739//mitochondrion;GO:0005740//mitochondrial envelope;GO:0005743//mitochondrial inner membrane;GO:0005746//mitochondrial respirasome;GO:0005747//mitochondrial respiratory chain complex I;GO:0016020//membrane;GO:0016021//integral component of membrane;GO:0019866//organelle inner membrane;GO:0…	GO:0003674//molecular_function;GO:0003824//catalytic activity;GO:0003954//NADH dehydrogenase activity;GO:0005451//monovalent cation:proton antiporter activity;GO:0008137//NADH dehydrogenase (ubiquinone) activity;GO:0016491//oxidoreductase activity;GO:0016651//oxidoreductase activity, acting on NAD(P)H;GO:0016655//oxidoreductase activity, acting on NAD(P)H, quinone or similar compound as acceptor;…	GO:0000302//response to reactive oxygen species;GO:0001666//response to hypoxia;GO:0006091//generation of precursor metabolites and energy;GO:0006119//oxidative phosphorylation;GO:0006120//mitochondrial electron transport, NADH to ubiquinone;GO:0006139//nucleobase-containing compound metabolic process;GO:0006163//purine nucleotide metabolic process;GO:0006725//cellular aromatic compound metabolic…	--
Unigene0001504	10	12	7	14	7	1083	545	232	454	354	0.57	0.6	0.36	0.56	0.31	40.18	15.49	11.18	19.44	13.99	0.48	20.056	5.384855685	3.20E-34	1.42E-31	--	-	-	-	-	-	-	-	-	--
Unigene0000364	0	3	1	1	0	131	61	33	25	21	0	0.21	0.07	0.06	0	6.83	2.44	2.24	1.5	1.17	0.068	2.836	5.382178976	7.85E-09	2.65E-07	--	-	-	-	-	-	-	-	-	--
Unigene0027091	7	103	3	59	17	2190	4326	217	2993	639	0.69	8.95	0.27	4.14	1.32	141.39	213.91	18.21	223.05	43.95	3.074	128.102	5.381032025	1.21E-07	3.28E-06	ACYP2	XP_045124595.1 acylphosphatase-2-like [Portunus trituberculatus]	Metabolism;Metabolism	Global and overview maps;Carbohydrate metabolism	ko01100//Metabolic pathways;ko00620//Pyruvate metabolism	K01512;K01512	-	GO:0003674//molecular_function;GO:0003824//catalytic activity;GO:0003998//acylphosphatase activity;GO:0016787//hydrolase activity;GO:0016817//hydrolase activity, acting on acid anhydrides;GO:0016818//hydrolase activity, acting on acid anhydrides, in phosphorus-containing anhydrides	-	--
Unigene0021897	2	0	2	0	1	38	53	52	83	40	0.24	0	0.21	0	0.09	2.95	3.15	5.25	7.44	3.31	0.108	4.42	5.354943152	8.92E-11	4.13E-09	--	XP_045611418.1 uncharacterized protein LOC123766397 [Procambarus clarkii]	-	-	-	-	-	-	-	--
Unigene0045857	114	113	140	179	143	10485	10036	5460	4049	5149	6.42	5.58	7.08	7.13	6.28	384.29	281.73	260.04	171.3	201.04	6.498	259.68	5.320595351	1.95E-93	9.04E-90	AHSA1	XP_045101414.1 activator of 90 kDa heat shock protein ATPase homolog 1-like [Portunus trituberculatus]	-	-	-	-	GO:0005575//cellular_component;GO:0005622//intracellular anatomical structure;GO:0005737//cytoplasm;GO:0005783//endoplasmic reticulum;GO:0005829//cytosol;GO:0012505//endomembrane system;GO:0043226//organelle;GO:0043227//membrane-bounded organelle;GO:0043229//intracellular organelle;GO:0043231//intracellular membrane-bounded organelle	GO:0001671//ATPase activator activity;GO:0003674//molecular_function;GO:0005488//binding;GO:0005515//protein binding;GO:0008047//enzyme activator activity;GO:0030234//enzyme regulator activity;GO:0031072//heat shock protein binding;GO:0051087//chaperone binding;GO:0051879//Hsp90 protein binding;GO:0060589//nucleoside-triphosphatase regulator activity;GO:0060590//ATPase regulator activity;GO:00987…	GO:0006457//protein folding;GO:0006950//response to stress;GO:0008150//biological_process;GO:0009266//response to temperature stimulus;GO:0009408//response to heat;GO:0009628//response to abiotic stimulus;GO:0009987//cellular process;GO:0032781//positive regulation of ATPase activity;GO:0033554//cellular response to stress;GO:0034605//cellular response to heat;GO:0043085//positive regulation of c…	--
Unigene0045322	0	0	0	1	1	0	42	0	12	41	0	0	0	0.29	0.32	0	8.63	0	3.72	11.72	0.122	4.814	5.302283089	0.002166738	0.019434385	--	-	-	-	-	-	GO:0016021//integral component of membrane;GO:0019013//viral nucleocapsid	GO:0016747//acyltransferase activity, transferring groups other than amino-acyl groups;GO:0050531//mannosyl-3-phosphoglycerate phosphatase activity	GO:0090529//cell septum assembly	--
Unigene0045856	85	47	97	71	85	5299	5497	3302	2468	3116	9.93	4.81	10.17	5.86	7.75	402.74	319.98	326.11	216.51	252.28	7.704	303.524	5.300059083	5.09E-72	1.25E-68	--	-	-	-	-	-	-	-	-	--
Unigene0012667	7	4	0	4	1	116	24	272	54	280	0.66	0.33	0	0.26	0.07	7.07	1.12	21.53	3.8	18.17	0.264	10.338	5.291275368	2.86E-07	7.18E-06	lipl-1	XP_045106990.1 lipase 3-like [Portunus trituberculatus]	Cellular Processes;Metabolism	Transport and catabolism;Lipid metabolism	ko04142//Lysosome;ko00100//Steroid biosynthesis	K01052;K01052	-	-	GO:0006629//lipid metabolic process	--
Unigene0001246	45	15	34	34	16	2074	2064	1397	1140	675	4.97	1.45	3.37	2.66	1.38	149.07	113.62	130.47	94.58	51.68	2.766	107.884	5.285535952	6.85E-40	4.68E-37	--	-	-	-	-	-	-	-	-	--
Unigene0006919	4	4	1	1	1	418	4	115	7	0	0.51	0.45	0.11	0.09	0.1	34.57	0.25	12.36	0.67	0	0.252	9.57	5.247023286	0.001539022	0.014533312	--	KAG0721019.1 hypothetical protein GWK47_047309 [Chionoecetes opilio]	-	-	-	-	-	-	-	--
Unigene0036527	0	1	0	2	1	11	15	78	14	33	0	0.12	0	0.2	0.11	1.01	1.05	9.28	1.48	3.22	0.086	3.208	5.221193672	3.97E-06	7.97E-05	--	KAG0718095.1 hypothetical protein GWK47_053155 [Chionoecetes opilio]	-	-	-	-	-	-	-	--
Unigene0043340	102	140	113	214	158	8470	10053	5543	5970	3871	9.82	11.81	9.77	14.57	11.87	530.79	482.52	451.38	431.85	258.42	11.568	430.992	5.219449728	2.31E-93	9.63E-90	--	-	-	-	-	-	GO:0042025//host cell nucleus	GO:0003700//DNA-binding transcription factor activity	GO:0006355//regulation of transcription, DNA-templated	--
Unigene0038282	0	0	0	0	1	4	13	7	14	4	0	0	0	0	0.2	0.68	1.69	1.54	2.74	0.72	0.04	1.474	5.203592714	0.000549538	0.006075097	--	-	-	-	-	-	GO:0016020//membrane;GO:0030176//integral component of endoplasmic reticulum membrane;GO:0033179//proton-transporting V-type ATPase, V0 domain	GO:0015078//proton transmembrane transporter activity	GO:1902600//proton transmembrane transport;GO:2001256//regulation of store-operated calcium entry	--
Unigene0035528	0	2	0	0	0	8	6	27	10	34	0	0.19	0	0	0	0.57	0.33	2.52	0.83	2.6	0.038	1.37	5.172032664	7.41E-05	0.001063585	--	-	-	-	-	-	GO:0000775//chromosome, centromeric region	GO:0003677//DNA binding;GO:0003682//chromatin binding	-	--
Unigene0036655	90	73	122	81	81	5110	5209	3604	3821	2644	10.17	7.23	12.38	6.48	7.14	375.9	293.48	344.5	324.45	207.2	8.68	309.106	5.154262805	8.47E-76	2.94E-72	--	-	-	-	-	-	-	-	-	--
Unigene0034924	3	4	0	10	1	13	170	133	174	254	0.2	0.24	0	0.48	0.05	0.57	5.71	7.58	8.81	11.87	0.194	6.908	5.154139525	2.07E-11	1.07E-09	--	XP_045112120.1 uncharacterized protein LOC123505115 [Portunus trituberculatus]	-	-	-	-	-	-	GO:0006351//transcription, DNA-templated	--
Unigene0010282	0	2	0	0	0	20	33	17	8	17	0	0.36	0	0	0	2.7	3.41	2.98	1.24	2.44	0.072	2.554	5.148617808	8.07E-06	0.000149917	--	-	-	-	-	-	-	-	-	--
Unigene0025764	2	0	0	0	4	2	10	151	4	65	0.22	0	0	0	0.34	0.14	0.54	13.88	0.33	4.9	0.112	3.958	5.143200975	0.003971113	0.032125218	Serpina1	CAJ38562.1 serpin 2 precursor [Branchiostoma lanceolatum]	-	-	-	-	GO:0000139//Golgi membrane;GO:0005575//cellular_component;GO:0005576//extracellular region;GO:0005615//extracellular space;GO:0005622//intracellular anatomical structure;GO:0005737//cytoplasm;GO:0005783//endoplasmic reticulum;GO:0005788//endoplasmic reticulum lumen;GO:0005793//endoplasmic reticulum-Golgi intermediate compartment;GO:0005794//Golgi apparatus;GO:0005798//Golgi-associated vesicle;GO:…	GO:0002020//protease binding;GO:0003674//molecular_function;GO:0004857//enzyme inhibitor activity;GO:0004866//endopeptidase inhibitor activity;GO:0004867//serine-type endopeptidase inhibitor activity;GO:0005488//binding;GO:0005515//protein binding;GO:0008964//phosphoenolpyruvate carboxylase activity;GO:0019899//enzyme binding;GO:0030234//enzyme regulator activity;GO:0030414//peptidase inhibitor a…	GO:0001101//response to acid chemical;GO:0001666//response to hypoxia;GO:0001775//cell activation;GO:0002237//response to molecule of bacterial origin;GO:0002252//immune effector process;GO:0002263//cell activation involved in immune response;GO:0002274//myeloid leukocyte activation;GO:0002275//myeloid cell activation involved in immune response;GO:0002283//neutrophil activation involved in immun…	--
Unigene0044347	0	0	1	0	0	1	2	1	20	21	0	0	0.17	0	0	0.12	0.18	0.16	2.79	2.7	0.034	1.19	5.129283017	0.003139687	0.026442535	--	-	-	-	-	-	-	-	-	--
Unigene0037651	1	0	0	0	2	2	2	73	2	31	0.11	0	0	0	0.17	0.15	0.11	6.89	0.17	2.4	0.056	1.944	5.117457582	0.000793884	0.00829407	Crp	XP_020898636.2 basement membrane-specific heparan sulfate proteoglycan core protein [Exaiptasia diaphana]	-	-	-	-	GO:0005575//cellular_component;GO:0005576//extracellular region;GO:0005615//extracellular space;GO:0030175//filopodium;GO:0030424//axon;GO:0030426//growth cone;GO:0030427//site of polarized growth;GO:0042995//cell projection;GO:0043005//neuron projection;GO:0098858//actin-based cell projection;GO:0120025//plasma membrane bounded cell projection;GO:0150034//distal axon	GO:0001846//opsonin binding;GO:0001848//complement binding;GO:0001849//complement component C1q complex binding;GO:0003674//molecular_function;GO:0005102//signaling receptor binding;GO:0005488//binding;GO:0005496//steroid binding;GO:0005509//calcium ion binding;GO:0005515//protein binding;GO:0008289//lipid binding;GO:0015485//cholesterol binding;GO:0030169//low-density lipoprotein particle bindin…	GO:0000302//response to reactive oxygen species;GO:0001505//regulation of neurotransmitter levels;GO:0001666//response to hypoxia;GO:0001817//regulation of cytokine production;GO:0002250//adaptive immune response;GO:0002252//immune effector process;GO:0002253//activation of immune response;GO:0002376//immune system process;GO:0002443//leukocyte mediated immunity;GO:0002449//lymphocyte mediated im…	--
Unigene0020410	0	0	0	0	2	28	4	18	6	21	0	0	0	0	0.16	1.86	0.2	1.55	0.46	1.48	0.032	1.11	5.116343961	0.000144759	0.001916051	--	XP_045101994.1 uncharacterized protein LOC123498703 [Portunus trituberculatus]	-	-	-	-	-	-	-	--
Unigene0044813	2	0	0	0	0	48	34	15	7	6	0.24	0	0	0	0	3.7	2.01	1.5	0.62	0.49	0.048	1.664	5.115477217	2.26E-05	0.000374811	--	-	-	-	-	-	-	-	-	--
Unigene0030102	0	0	1	0	0	12	2	7	14	8	0	0	0.35	0	0	3.02	0.39	2.29	4.07	2.15	0.07	2.384	5.089885504	0.000528091	0.005873727	--	-	-	-	-	-	-	-	-	--
Unigene0004930	0	1	0	0	0	13	12	8	2	11	0	0.22	0	0	0	2.09	1.48	1.67	0.37	1.88	0.044	1.498	5.08939029	0.000336313	0.003978641	--	-	-	-	-	-	-	-	-	--
Unigene0035162	0	0	1	0	0	26	14	3	2	4	0	0	0.15	0	0	2.81	1.16	0.42	0.25	0.46	0.03	1.02	5.087462841	0.000987209	0.009978448	--	-	-	-	-	-	-	-	-	--
Unigene0046306	0	1	0	1	0	8	27	3	21	23	0	0.12	0	0.09	0	0.7	1.8	0.34	2.11	2.14	0.042	1.418	5.077324394	6.98E-05	0.001009576	--	-	-	-	-	-	-	-	-	--
Unigene0037965	0	2	0	0	0	4	46	2	7	38	0	0.46	0	0	0	0.68	5.97	0.44	1.37	6.86	0.092	3.064	5.057638626	0.000309534	0.003701787	--	-	-	-	-	-	-	-	-	--
Unigene0024924	0	1	0	0	0	0	6	10	21	3	0	0.15	0	0	0	0	0.5	1.43	2.66	0.35	0.03	0.988	5.041476636	0.003833221	0.031246375	--	-	-	-	-	-	-	-	-	--
Unigene0028162	0	0	1	0	0	17	7	12	3	4	0	0	0.16	0	0	1.94	0.61	1.78	0.39	0.49	0.032	1.042	5.025139562	0.000622565	0.006753208	--	XP_043212993.1 uncharacterized protein LOC122377098 [Amphibalanus amphitrite]	-	-	-	-	-	-	-	--
Unigene0042916	2	0	0	3	1	1	14	136	2	51	0.28	0	0	0.29	0.11	0.09	0.96	15.86	0.21	4.87	0.136	4.398	5.015169048	0.00187269	0.01718551	Apoe	-	-	-	-	-	GO:0000323//lytic vacuole;GO:0005575//cellular_component;GO:0005576//extracellular region;GO:0005615//extracellular space;GO:0005622//intracellular anatomical structure;GO:0005634//nucleus;GO:0005635//nuclear envelope;GO:0005737//cytoplasm;GO:0005764//lysosome;GO:0005768//endosome;GO:0005769//early endosome;GO:0005770//late endosome;GO:0005773//vacuole;GO:0005783//endoplasmic reticulum;GO:0005788…	GO:0001540//amyloid-beta binding;GO:0003674//molecular_function;GO:0003690//double-stranded DNA binding;GO:0005102//signaling receptor binding;GO:0005198//structural molecule activity;GO:0005215//transporter activity;GO:0005319//lipid transporter activity;GO:0005488//binding;GO:0005496//steroid binding;GO:0005515//protein binding;GO:0005539//glycosaminoglycan binding;GO:0005543//phospholipid bind…	GO:0000302//response to reactive oxygen species;GO:0001101//response to acid chemical;GO:0001523//retinoid metabolic process;GO:0001558//regulation of cell growth;GO:0001568//blood vessel development;GO:0001932//regulation of protein phosphorylation;GO:0001933//negative regulation of protein phosphorylation;GO:0001936//regulation of endothelial cell proliferation;GO:0001937//negative regulation o…	--
Unigene0011635	4	16	11	5	8	744	279	443	148	168	0.15	0.54	0.38	0.14	0.24	18.5	5.31	14.31	4.25	4.45	0.29	9.364	5.013000129	9.43E-19	1.33E-16	--	XP_045135934.1 histone-lysine N-methyltransferase 2D-like isoform X1 [Portunus trituberculatus]	-	-	-	-	-	-	-	--
Unigene0001959	0	0	1	0	0	18	1	3	14	4	0	0	0.26	0	0	3.44	0.15	0.74	3.09	0.81	0.052	1.646	4.984308902	0.002181928	0.019558004	--	-	-	-	-	-	-	-	-	--
Unigene0013143	0	1	0	0	0	12	4	8	3	12	0	0.17	0	0	0	1.52	0.39	1.31	0.44	1.62	0.034	1.056	4.956931278	0.000863241	0.008909706	--	-	-	-	-	-	-	-	-	--
Unigene0045402	444	197	55	122	68	12219	12919	7621	3212	2354	19.78	7.69	2.2	3.84	2.36	354.27	286.88	287.12	107.5	72.71	7.174	221.696	4.949661185	1.51E-10	6.67E-09	Hsp22	KAG0721980.1 Heat shock protein 22 [Chionoecetes opilio]	-	-	-	-	GO:0022627//cytosolic small ribosomal subunit	GO:0003735//structural constituent of ribosome	GO:0006412//translation	--
Unigene0010926	0	10	3	0	0	49	16	130	12	279	0	0.85	0.26	0	0	3.1	0.78	10.69	0.88	18.8	0.222	6.85	4.947472406	0.001800009	0.016606326	--	-	-	-	-	-	-	-	-	--
Unigene0025489	744	669	1099	975	951	39773	32021	26547	36013	33830	62.26	49.06	82.59	57.7	62.1	2165.92	1335.56	1878.57	2263.75	1962.57	62.742	1921.274	4.936487953	2.41E-96	1.43E-92	Hsp60A	AKN44272.1 heat shock protein 60 [Eriocheir sinensis]	Organismal Systems;Genetic Information Processing	Aging;Folding, sorting and degradation	ko04212//Longevity regulating pathway - worm;ko03018//RNA degradation	K04077;K04077	GO:0000307//cyclin-dependent protein kinase holoenzyme complex;GO:0005575//cellular_component;GO:0005576//extracellular region;GO:0005615//extracellular space;GO:0005622//intracellular anatomical structure;GO:0005634//nucleus;GO:0005737//cytoplasm;GO:0005739//mitochondrion;GO:0005740//mitochondrial envelope;GO:0005743//mitochondrial inner membrane;GO:0005759//mitochondrial matrix;GO:0005768//endo…	GO:0000166//nucleotide binding;GO:0001530//lipopolysaccharide binding;GO:0002020//protease binding;GO:0002039//p53 binding;GO:0003674//molecular_function;GO:0003676//nucleic acid binding;GO:0003677//DNA binding;GO:0003688//DNA replication origin binding;GO:0003690//double-stranded DNA binding;GO:0003697//single-stranded DNA binding;GO:0003723//RNA binding;GO:0003725//double-stranded RNA binding;G…	GO:0000302//response to reactive oxygen species;GO:0001666//response to hypoxia;GO:0001775//cell activation;GO:0001816//cytokine production;GO:0001817//regulation of cytokine production;GO:0001819//positive regulation of cytokine production;GO:0002119//nematode larval development;GO:0002164//larval development;GO:0002200//somatic diversification of immune receptors;GO:0002204//somatic recombinati…	--
Unigene0029301	0	2	0	0	0	3	76	0	3	16	0	0.57	0	0	0	0.64	12.4	0	0.74	3.63	0.114	3.482	4.932810473	0.002793829	0.024029356	--	-	-	-	-	-	-	-	-	--
Unigene0016830	1	0	0	0	0	1	10	8	24	0	0.25	0	0	0	0	0.16	1.24	1.69	4.49	0	0.05	1.516	4.922197848	0.004580383	0.036203281	--	-	-	-	-	-	-	-	-	--
Unigene0005747	2	1	0	3	1	139	7	73	7	18	0.21	0.09	0	0.23	0.08	9.64	0.37	6.58	0.56	1.33	0.122	3.696	4.921011704	3.86E-06	7.78E-05	--	XP_045102279.1 uncharacterized protein LOC123498865 [Portunus trituberculatus]	-	-	-	-	-	GO:0003700//DNA-binding transcription factor activity;GO:0004540//ribonuclease activity	GO:0006355//regulation of transcription, DNA-templated;GO:0008033//tRNA processing	--
Unigene0001501	0	0	1	0	0	28	6	3	3	1	0	0	0.14	0	0	2.88	0.47	0.4	0.36	0.11	0.028	0.844	4.913744267	0.003493543	0.028918926	--	-	-	-	-	-	-	-	-	--
Unigene0004460	1	0	0	0	0	4	0	19	6	10	0.18	0	0	0	0	0.46	0	2.86	0.8	1.23	0.036	1.07	4.89347008	0.003424252	0.028441433	--	-	-	-	-	-	-	-	-	--
Unigene0025488	52	35	52	26	22	1843	1292	1360	1472	1098	17.46	10.3	15.68	6.17	5.76	402.63	216.18	386.07	371.19	255.53	11.074	326.32	4.88103908	1.73E-41	1.44E-38	--	-	-	-	-	-	-	-	-	--
Unigene0003074	2	6	1	4	6	179	340	49	153	20	0.09	0.25	0.04	0.13	0.22	5.5	7.99	1.95	5.42	0.65	0.146	4.302	4.880967251	1.16E-11	6.21E-10	--	-	-	-	-	-	-	-	-	--
Unigene0003903	0	0	0	0	2	29	19	11	2	8	0	0	0	0	0.51	6.16	3.09	3.04	0.49	1.81	0.102	2.918	4.838338826	0.000424006	0.004862756	--	-	-	-	-	-	-	-	-	--
Unigene0043342	200	240	190	349	243	10889	12873	6427	6577	6864	12.99	13.66	11.08	16.03	12.32	460.35	416.82	353.07	320.95	309.13	13.216	372.064	4.815193309	3.27E-138	3.40E-134	STIP1	XP_045107121.1 stress-induced-phosphoprotein 1-like [Portunus trituberculatus]	-	-	-	-	GO:0005575//cellular_component;GO:0005622//intracellular anatomical structure;GO:0005634//nucleus;GO:0005737//cytoplasm;GO:0005794//Golgi apparatus;GO:0005829//cytosol;GO:0012505//endomembrane system;GO:0032991//protein-containing complex;GO:0043209//myelin sheath;GO:0043226//organelle;GO:0043227//membrane-bounded organelle;GO:0043229//intracellular organelle;GO:0043231//intracellular membrane-bo…	GO:0003674//molecular_function;GO:0003676//nucleic acid binding;GO:0003723//RNA binding;GO:0003729//mRNA binding;GO:0004857//enzyme inhibitor activity;GO:0005215//transporter activity;GO:0005488//binding;GO:0005515//protein binding;GO:0008022//protein C-terminus binding;GO:0030234//enzyme regulator activity;GO:0030544//Hsp70 protein binding;GO:0031072//heat shock protein binding;GO:0042030//ATPas…	GO:0000003//reproduction;GO:0006457//protein folding;GO:0006605//protein targeting;GO:0006626//protein targeting to mitochondrion;GO:0006810//transport;GO:0006839//mitochondrial transport;GO:0006886//intracellular protein transport;GO:0006950//response to stress;GO:0006996//organelle organization;GO:0007005//mitochondrion organization;GO:0007275//multicellular organism development;GO:0007568//agi…	--
Unigene0001734	0	0	1	0	1	0	15	2	13	41	0	0	0.19	0	0.17	0	1.59	0.36	2.07	6.03	0.072	2.01	4.803054785	0.002054071	0.018571795	--	XP_042855685.1 uncharacterized protein LOC122242464 [Penaeus japonicus]	-	-	-	-	-	-	-	--
Unigene0006513	0	0	1	0	0	4	25	6	0	7	0	0	0.18	0	0	0.52	2.5	1.02	0	0.97	0.036	1.002	4.798741792	0.005155463	0.039982431	--	-	-	-	-	-	-	-	-	--
Unigene0005775	0	1	0	1	0	44	2	5	0	14	0	0.29	0	0.24	0	9.61	0.33	1.42	0	3.26	0.106	2.924	4.785807141	0.003351385	0.027914133	--	-	-	-	-	-	-	-	-	--
Unigene0023608	214	242	270	299	278	10556	13454	8660	5043	7699	9.91	9.81	11.22	9.79	10.04	317.93	310.35	338.93	175.32	247.02	10.154	277.91	4.774497677	2.89E-96	1.51E-92	unc45b	XP_045105899.1 LOW QUALITY PROTEIN: protein unc-45 homolog B-like [Portunus trituberculatus]	-	-	-	-	GO:0000221//vacuolar proton-transporting V-type ATPase, V1 domain;GO:0005575//cellular_component;GO:0005622//intracellular anatomical structure;GO:0005737//cytoplasm;GO:0005886//plasma membrane;GO:0005938//cell cortex;GO:0016020//membrane;GO:0032153//cell division site;GO:0032154//cleavage furrow;GO:0071944//cell periphery;GO:0098590//plasma membrane region;GO:0099568//cytoplasmic region	GO:0003674//molecular_function;GO:0005488//binding;GO:0005515//protein binding;GO:0019899//enzyme binding;GO:0031625//ubiquitin protein ligase binding;GO:0042802//identical protein binding;GO:0044389//ubiquitin-like protein ligase binding	GO:0000003//reproduction;GO:0006457//protein folding;GO:0006950//response to stress;GO:0006996//organelle organization;GO:0007010//cytoskeleton organization;GO:0007275//multicellular organism development;GO:0007525//somatic muscle development;GO:0007610//behavior;GO:0008150//biological_process;GO:0009266//response to temperature stimulus;GO:0009408//response to heat;GO:0009628//response to abioti…	--
Unigene0022091	1	1	0	2	3	1	18	146	0	32	0.16	0.14	0	0.23	0.38	0.1	1.44	19.78	0	3.55	0.182	4.974	4.772396152	0.005808488	0.044175049	Mtnd1	QQY85595.1 NADH dehydrogenase subunit 1 [Holothuria spinifera]	Metabolism;Metabolism	Global and overview maps;Energy metabolism	ko01100//Metabolic pathways;ko00190//Oxidative phosphorylation	K03878;K03878	GO:0005575//cellular_component;GO:0005622//intracellular anatomical structure;GO:0005737//cytoplasm;GO:0005739//mitochondrion;GO:0005740//mitochondrial envelope;GO:0005743//mitochondrial inner membrane;GO:0005746//mitochondrial respirasome;GO:0005747//mitochondrial respiratory chain complex I;GO:0016020//membrane;GO:0016021//integral component of membrane;GO:0019866//organelle inner membrane;GO:0…	GO:0003674//molecular_function;GO:0003824//catalytic activity;GO:0003954//NADH dehydrogenase activity;GO:0008137//NADH dehydrogenase (ubiquinone) activity;GO:0016491//oxidoreductase activity;GO:0016651//oxidoreductase activity, acting on NAD(P)H;GO:0016655//oxidoreductase activity, acting on NAD(P)H, quinone or similar compound as acceptor;GO:0050136//NADH dehydrogenase (quinone) activity	GO:0006091//generation of precursor metabolites and energy;GO:0006119//oxidative phosphorylation;GO:0006120//mitochondrial electron transport, NADH to ubiquinone;GO:0006139//nucleobase-containing compound metabolic process;GO:0006163//purine nucleotide metabolic process;GO:0006725//cellular aromatic compound metabolic process;GO:0006753//nucleoside phosphate metabolic process;GO:0006793//phosphor…	--
Unigene0042320	1	0	0	0	1	15	30	19	6	4	0.17	0	0	0	0.13	1.66	2.55	2.74	0.77	0.47	0.06	1.638	4.770829046	0.000137957	0.001834172	--	-	-	-	-	-	-	-	-	--
Unigene0021548	139	123	133	213	283	7577	6010	4245	6297	5286	8.59	6.66	7.38	9.31	13.65	304.83	185.18	221.92	292.42	226.54	9.118	246.178	4.75484062	1.94E-58	3.00E-55	Hsc70-3	AHA61465.1 heat shock protein 70 cognate 3 [Eriocheir sinensis]	Genetic Information Processing;Genetic Information Processing	Folding, sorting and degradation;Folding, sorting and degradation	ko04141//Protein processing in endoplasmic reticulum;ko03060//Protein export	K09490;K09490	GO:0000323//lytic vacuole;GO:0000974//Prp19 complex;GO:0001917//photoreceptor inner segment;GO:0005575//cellular_component;GO:0005576//extracellular region;GO:0005615//extracellular space;GO:0005622//intracellular anatomical structure;GO:0005634//nucleus;GO:0005635//nuclear envelope;GO:0005681//spliceosomal complex;GO:0005730//nucleolus;GO:0005737//cytoplasm;GO:0005739//mitochondrion;GO:0005764//…	GO:0000166//nucleotide binding;GO:0001664//G protein-coupled receptor binding;GO:0003674//molecular_function;GO:0003676//nucleic acid binding;GO:0003723//RNA binding;GO:0003824//catalytic activity;GO:0004856//xylulokinase activity;GO:0005102//signaling receptor binding;GO:0005488//binding;GO:0005504//fatty acid binding;GO:0005509//calcium ion binding;GO:0005515//protein binding;GO:0005524//ATP bi…	GO:0000003//reproduction;GO:0000082//G1/S transition of mitotic cell cycle;GO:0000271//polysaccharide biosynthetic process;GO:0000278//mitotic cell cycle;GO:0000741//karyogamy;GO:0000742//karyogamy involved in conjugation with cellular fusion;GO:0000746//conjugation;GO:0000747//conjugation with cellular fusion;GO:0001655//urogenital system development;GO:0001822//kidney development;GO:0001910//re…	--
Unigene0004542	0	0	1	0	0	8	1	5	9	11	0	0	0.44	0	0	2.53	0.24	2.06	3.29	3.71	0.088	2.366	4.74880274	0.002471631	0.02168351	--	-	-	-	-	-	-	-	-	--
Unigene0028077	0	2	0	2	2	29	5	93	33	5	0	0.27	0	0.22	0.24	2.88	0.38	12.01	3.79	0.53	0.146	3.918	4.746077123	2.96E-05	0.000473552	Skeletor	XP_042225999.1 protein Skeletor, isoforms B/C-like [Homarus americanus]	-	-	-	-	GO:0005575//cellular_component;GO:0005622//intracellular anatomical structure;GO:0005634//nucleus;GO:0005694//chromosome;GO:0005700//polytene chromosome;GO:0005737//cytoplasm;GO:0005768//endosome;GO:0005794//Golgi apparatus;GO:0005802//trans-Golgi network;GO:0012505//endomembrane system;GO:0016020//membrane;GO:0016021//integral component of membrane;GO:0031224//intrinsic component of membrane;GO:…	GO:0003674//molecular_function;GO:0003824//catalytic activity;GO:0004497//monooxygenase activity;GO:0004500//dopamine beta-monooxygenase activity;GO:0005198//structural molecule activity;GO:0005488//binding;GO:0016491//oxidoreductase activity;GO:0016705//oxidoreductase activity, acting on paired donors, with incorporation or reduction of molecular oxygen;GO:0016715//oxidoreductase activity, actin…	GO:0000226//microtubule cytoskeleton organization;GO:0006584//catecholamine metabolic process;GO:0006725//cellular aromatic compound metabolic process;GO:0006807//nitrogen compound metabolic process;GO:0006996//organelle organization;GO:0006997//nucleus organization;GO:0007010//cytoskeleton organization;GO:0007017//microtubule-based process;GO:0007049//cell cycle;GO:0007051//spindle organization;…	--
Unigene0040331	33	3	2	19	26	10	96	1774	26	465	2.41	0.19	0.13	0.98	1.48	0.48	3.5	109.59	1.43	23.55	1.038	27.71	4.738528362	0.001074506	0.010715224	Alb	-	-	-	-	-	GO:0005575//cellular_component;GO:0005576//extracellular region;GO:0005604//basement membrane;GO:0005615//extracellular space;GO:0005622//intracellular anatomical structure;GO:0005737//cytoplasm;GO:0005783//endoplasmic reticulum;GO:0005788//endoplasmic reticulum lumen;GO:0005794//Golgi apparatus;GO:0012505//endomembrane system;GO:0030141//secretory granule;GO:0031012//extracellular matrix;GO:0031…	GO:0003674//molecular_function;GO:0003676//nucleic acid binding;GO:0003677//DNA binding;GO:0005488//binding;GO:0005504//fatty acid binding;GO:0005507//copper ion binding;GO:0005515//protein binding;GO:0008270//zinc ion binding;GO:0008289//lipid binding;GO:0015643//toxic substance binding;GO:0016209//antioxidant activity;GO:0019825//oxygen binding;GO:0019842//vitamin binding;GO:0019899//enzyme bin…	GO:0001897//cytolysis by symbiont of host cells;GO:0001906//cell killing;GO:0001907//killing by symbiont of host cells;GO:0002576//platelet degranulation;GO:0003008//system process;GO:0003013//circulatory system process;GO:0003018//vascular process in circulatory system;GO:0006464//cellular protein modification process;GO:0006807//nitrogen compound metabolic process;GO:0006810//transport;GO:00068…	--
Unigene0039335	6	2	9	11	4	236	188	195	146	274	0.91	0.27	1.22	1.18	0.47	23.26	14.19	24.98	16.61	28.77	0.81	21.562	4.734425284	7.94E-30	2.73E-27	--	XP_045128724.1 DNA topoisomerase 2-binding protein 1-like [Portunus trituberculatus]	Genetic Information Processing	Replication and repair	ko03440//Homologous recombination	K10728	GO:0000228//nuclear chromosome;GO:0000793//condensed chromosome;GO:0000794//condensed nuclear chromosome;GO:0000922//spindle pole;GO:0001673//male germ cell nucleus;GO:0005575//cellular_component;GO:0005622//intracellular anatomical structure;GO:0005634//nucleus;GO:0005654//nucleoplasm;GO:0005694//chromosome;GO:0005737//cytoplasm;GO:0005815//microtubule organizing center;GO:0005819//spindle;GO:00…	GO:0003674//molecular_function;GO:0003676//nucleic acid binding;GO:0003677//DNA binding;GO:0005488//binding;GO:0005515//protein binding;GO:0008022//protein C-terminus binding;GO:0008839//4-hydroxy-tetrahydrodipicolinate reductase;GO:0042802//identical protein binding;GO:0097159//organic cyclic compound binding;GO:1901363//heterocyclic compound binding	GO:0000003//reproduction;GO:0000075//cell cycle checkpoint signaling;GO:0000076//DNA replication checkpoint signaling;GO:0000077//DNA damage checkpoint signaling;GO:0000278//mitotic cell cycle;GO:0000280//nuclear division;GO:0006139//nucleobase-containing compound metabolic process;GO:0006259//DNA metabolic process;GO:0006260//DNA replication;GO:0006261//DNA-dependent DNA replication;GO:0006270//…	--
Unigene0032713	0	0	1	0	0	9	5	4	3	14	0	0	0.13	0	0	0.85	0.36	0.49	0.33	1.41	0.026	0.688	4.725825037	0.001777687	0.016422216	--	-	-	-	-	-	-	-	-	--
Unigene0045340	2	1	1	1	0	29	36	26	40	42	0.23	0.1	0.1	0.08	0	2.16	2.05	2.51	3.43	3.33	0.102	2.696	4.724179439	5.48E-09	1.89E-07	--	-	-	-	-	-	-	-	-	--
Unigene0034793	0	0	0	4	0	2	6	29	20	44	0	0	0	0.68	0	0.31	0.72	5.88	3.6	7.31	0.136	3.564	4.71181878	0.000467498	0.005281303	--	-	-	-	-	-	-	-	-	--
Unigene0020882	0	1	1	0	3	105	13	25	11	3	0	0.24	0.25	0	0.64	18.82	1.78	5.82	2.28	0.57	0.226	5.854	4.695028068	8.42E-05	0.001190349	--	-	-	-	-	-	-	-	-	--
Unigene0002620	67	78	79	114	102	2985	2708	3279	2257	2494	3.8	3.88	4.03	4.58	4.52	110.27	76.62	157.4	96.24	98.14	4.162	107.734	4.69405285	1.11E-75	3.57E-72	DNAJA1	XP_045105940.1 dnaJ homolog subfamily A member 1-like [Portunus trituberculatus]	-	-	-	-	GO:0005575//cellular_component;GO:0005622//intracellular anatomical structure;GO:0005737//cytoplasm;GO:0005829//cytosol	GO:0000166//nucleotide binding;GO:0003674//molecular_function;GO:0005488//binding;GO:0005515//protein binding;GO:0005524//ATP binding;GO:0017076//purine nucleotide binding;GO:0030554//adenyl nucleotide binding;GO:0031072//heat shock protein binding;GO:0032553//ribonucleotide binding;GO:0032555//purine ribonucleotide binding;GO:0032559//adenyl ribonucleotide binding;GO:0035639//purine ribonucleosi…	GO:0006457//protein folding;GO:0006950//response to stress;GO:0008150//biological_process;GO:0009266//response to temperature stimulus;GO:0009408//response to heat;GO:0009628//response to abiotic stimulus;GO:0009987//cellular process;GO:0050896//response to stimulus	--
Unigene0039663	15	16	20	32	8	1427	294	569	203	309	0.38	0.35	0.45	0.57	0.16	23.26	3.67	12.05	3.82	5.37	0.382	9.634	4.656490381	2.84E-17	3.30E-15	--	XP_045114641.1 flocculation protein FLO11-like isoform X3 [Portunus trituberculatus]	-	-	-	-	GO:0005576//extracellular region	GO:0008061//chitin binding	-	--
Unigene0037247	0	1	0	0	0	3	2	5	8	13	0	0.2	0	0	0	0.44	0.22	0.95	1.35	2.02	0.04	0.996	4.638073837	0.00377514	0.030822357	--	-	-	-	-	-	-	-	-	--
Unigene0045148	1	0	0	0	0	11	7	7	6	5	0.14	0	0	0	0	1.01	0.49	0.84	0.64	0.49	0.028	0.694	4.631436931	0.00080002	0.00835398	--	-	-	-	-	-	-	-	-	--
Unigene0021988	0	0	2	0	1	8	23	24	29	8	0	0	0.25	0	0.11	0.72	1.58	2.8	3	0.76	0.072	1.772	4.621237887	6.43E-05	0.000939727	--	-	-	-	-	-	-	-	-	--
Unigene0008408	0	1	0	2	3	32	41	23	28	48	0	0.17	0	0.28	0.46	4.05	3.98	3.78	4.09	6.47	0.182	4.474	4.619554901	7.01E-09	2.38E-07	--	-	-	-	-	-	-	-	-	--
Unigene0011547	185	197	175	237	176	7591	7917	4364	4110	5842	10.53	9.82	8.94	9.54	7.81	281.08	224.52	209.97	175.66	230.44	9.328	224.334	4.587936693	8.14E-144	1.70E-139	calub	XP_042203915.1 calumenin-like [Homarus americanus]	-	-	-	-	GO:0005575//cellular_component;GO:0005576//extracellular region;GO:0005622//intracellular anatomical structure;GO:0005634//nucleus;GO:0005694//chromosome;GO:0005700//polytene chromosome;GO:0005703//polytene chromosome puff;GO:0005737//cytoplasm;GO:0005783//endoplasmic reticulum;GO:0005788//endoplasmic reticulum lumen;GO:0005789//endoplasmic reticulum membrane;GO:0005794//Golgi apparatus;GO:001250…	GO:0003674//molecular_function;GO:0004857//enzyme inhibitor activity;GO:0005488//binding;GO:0005509//calcium ion binding;GO:0005515//protein binding;GO:0019899//enzyme binding;GO:0030234//enzyme regulator activity;GO:0043167//ion binding;GO:0043169//cation binding;GO:0046872//metal ion binding;GO:0098772//molecular function regulator	GO:0006139//nucleobase-containing compound metabolic process;GO:0006259//DNA metabolic process;GO:0006265//DNA topological change;GO:0006325//chromatin organization;GO:0006355//regulation of transcription, DNA-templated;GO:0006464//cellular protein modification process;GO:0006725//cellular aromatic compound metabolic process;GO:0006807//nitrogen compound metabolic process;GO:0006996//organelle or…	--
Unigene0002919	1	0	0	0	0	6	12	4	6	8	0.15	0	0	0	0	0.6	0.92	0.52	0.7	0.86	0.03	0.72	4.584962501	0.000950007	0.009670477	--	-	-	-	-	-	-	GO:0004222//metalloendopeptidase activity	-	--
Unigene0010595	5	0	0	3	1	108	216	3	6	2	0.4	0	0	0.17	0.06	5.67	8.69	0.2	0.36	0.11	0.126	3.006	4.57634937	0.004186309	0.033521054	--	XP_045112969.1 LOW QUALITY PROTEIN: VPS35 endosomal protein-sorting factor-like [Portunus trituberculatus]	-	-	-	-	-	-	-	--
Unigene0009664	1	0	0	0	0	3	15	0	14	5	0.24	0	0	0	0	0.48	1.82	0	2.56	0.85	0.048	1.142	4.572384435	0.00653169	0.048627525	--	XP_045102416.1 uncharacterized protein LOC123498926 isoform X6 [Portunus trituberculatus]	-	-	-	-	-	-	-	--
Unigene0008559	0	0	2	0	0	12	21	5	15	12	0	0	0.2	0	0	0.87	1.17	0.47	1.26	0.93	0.04	0.94	4.554588852	0.000151844	0.00199604	--	-	-	-	-	-	GO:0030176//integral component of endoplasmic reticulum membrane	-	GO:0015031//protein transport	--
Unigene0009054	21	15	18	15	5	694	444	146	530	464	2.78	1.74	2.14	1.4	0.52	59.81	29.31	16.35	52.72	42.6	1.716	40.158	4.548565962	4.65E-24	1.04E-21	--	-	-	-	-	-	-	GO:0004064//arylesterase activity	-	--
Unigene0029071	10	7	14	20	14	589	360	371	157	384	0.56	0.35	0.71	0.8	0.62	21.61	10.12	17.69	6.65	15.01	0.608	14.216	4.547300453	1.17E-28	3.71E-26	EGLN1	XP_045106935.1 prolyl 4-hydroxylase subunit alpha-like isoform X1 [Portunus trituberculatus]	-	-	-	-	-	GO:0016491//oxidoreductase activity	-	--
Unigene0021556	0	1	0	0	0	7	7	5	1	11	0	0.15	0	0	0	0.77	0.59	0.71	0.13	1.29	0.03	0.698	4.540192631	0.004226193	0.033788457	--	-	-	-	-	-	-	-	-	--
Unigene0034600	1	1	0	2	2	58	76	14	15	22	0.07	0.06	0	0.09	0.1	2.46	2.47	0.77	0.74	1	0.064	1.488	4.539158811	2.39E-07	6.07E-06	--	KAG0723026.1 LINE-1 retrotransposable element ORF2 protein [Chionoecetes opilio]	-	-	-	-	-	-	-	--
Unigene0004583	66	78	48	124	63	3048	2670	1701	1507	1952	2.09	2.16	1.36	2.77	1.55	62.72	42.08	45.48	35.8	42.79	1.986	45.774	4.526590841	3.51E-76	1.33E-72	--	XP_045113208.1 uncharacterized protein LOC123505658 isoform X1 [Portunus trituberculatus]	-	-	-	-	GO:0005575//cellular_component;GO:0005622//intracellular anatomical structure;GO:0005737//cytoplasm;GO:0005829//cytosol;GO:0005886//plasma membrane;GO:0016020//membrane;GO:0071944//cell periphery	GO:0003674//molecular_function;GO:0003824//catalytic activity;GO:0005488//binding;GO:0005515//protein binding;GO:0016301//kinase activity;GO:0016740//transferase activity;GO:0016772//transferase activity, transferring phosphorus-containing groups;GO:0016773//phosphotransferase activity, alcohol group as acceptor;GO:0035004//phosphatidylinositol 3-kinase activity;GO:0036312//phosphatidylinositol 3…	GO:0000003//reproduction;GO:0001667//ameboidal-type cell migration;GO:0001704//formation of primary germ layer;GO:0001707//mesoderm formation;GO:0001763//morphogenesis of a branching structure;GO:0002009//morphogenesis of an epithelium;GO:0002218//activation of innate immune response;GO:0002221//pattern recognition receptor signaling pathway;GO:0002224//toll-like receptor signaling pathway;GO:000…	--
Unigene0044658	0	1	0	1	0	11	17	2	4	23	0	0.14	0	0.12	0	1.18	1.4	0.28	0.5	2.63	0.052	1.198	4.525972475	0.000982564	0.00994598	--	-	-	-	-	-	-	GO:0008233//peptidase activity	-	--
Unigene0007443	0	2	0	1	0	8	46	11	3	23	0	0.17	0	0.07	0	0.51	2.25	0.91	0.22	1.56	0.048	1.09	4.505149919	0.000288318	0.00348205	--	XP_037773894.1 uncharacterized protein LOC119570066 [Penaeus monodon]	-	-	-	-	-	-	-	--
Unigene0031073	0	1	0	0	0	7	10	5	4	4	0	0.14	0	0	0	0.72	0.79	0.67	0.47	0.44	0.028	0.618	4.464108106	0.002839181	0.024354043	--	-	-	-	-	-	-	-	-	--
Unigene0001236	1	0	0	1	0	6	0	31	2	8	0.15	0	0	0.1	0	0.58	0	3.89	0.22	0.82	0.05	1.102	4.462052319	0.006229897	0.046731518	--	KAG0722361.1 RNA-directed DNA polymerase from mobile element jockey [Chionoecetes opilio]	Genetic Information Processing	Translation	ko03008//Ribosome biogenesis in eukaryotes	K14530	-	GO:0003964//RNA-directed DNA polymerase activity	GO:0000373//Group II intron splicing	--
Unigene0038060	1	0	5	2	1	80	53	4	118	0	0.09	0	0.41	0.13	0.07	4.7	2.38	0.31	8	0	0.14	3.078	4.458494499	0.003369249	0.028046103	--	-	-	-	-	-	-	-	-	--
Unigene0003637	0	1	3	1	5	34	159	10	70	20	0	0.07	0.22	0.06	0.32	1.81	6.49	0.69	4.31	1.14	0.134	2.888	4.429765836	7.20E-07	1.68E-05	--	KAG0713647.1 hypothetical protein GWK47_015729 [Chionoecetes opilio]	-	-	-	-	-	-	-	--
Unigene0019530	0	2	0	0	0	6	8	15	10	14	0	0.51	0	0	0	1.13	1.16	3.68	2.18	2.82	0.102	2.194	4.426922468	0.000509579	0.005702501	--	-	-	-	-	-	-	-	-	--
Unigene0019697	1	0	0	0	0	15	9	3	4	2	0.17	0	0	0	0	1.67	0.77	0.43	0.51	0.24	0.034	0.724	4.412383046	0.003683627	0.030240005	--	-	-	-	-	-	-	-	-	--
Unigene0034420	1	0	0	0	0	11	8	1	2	11	0.31	0	0	0	0	2.2	1.23	0.26	0.46	2.35	0.062	1.3	4.390099598	0.004882479	0.038128007	--	-	-	-	-	-	-	-	-	--
Unigene0005602	131	114	107	129	86	6130	3097	2819	1519	1585	4.83	3.69	3.55	3.37	2.48	147.2	56.96	87.96	42.1	40.55	3.584	74.954	4.386362929	4.67E-29	1.50E-26	l(2)efl	XP_045132470.1 uncharacterized protein LOC123516836 [Portunus trituberculatus]	-	-	-	-	-	-	-	--
Unigene0001395	2	4	2	4	0	66	137	18	29	88	0.1	0.17	0.09	0.14	0	2.13	3.39	0.76	1.08	3.03	0.1	2.078	4.377123749	3.54E-10	1.48E-08	--	-	-	-	-	-	-	-	-	--
Unigene0014879	1	0	1	1	0	22	23	14	2	20	0.18	0	0.16	0.13	0	2.62	2.1	2.17	0.27	2.54	0.094	1.94	4.367252085	0.000194538	0.00246976	--	-	-	-	-	-	GO:0005576//extracellular region	-	-	--
Unigene0035380	3	2	0	2	2	2	16	120	4	62	0.3	0.18	0	0.14	0.16	0.13	0.81	10.29	0.3	4.36	0.156	3.178	4.34850119	0.000134183	0.001790611	Ahsg	-	-	-	-	-	GO:0005575//cellular_component;GO:0005576//extracellular region;GO:0005615//extracellular space;GO:0005622//intracellular anatomical structure;GO:0005737//cytoplasm;GO:0005783//endoplasmic reticulum;GO:0005788//endoplasmic reticulum lumen;GO:0005794//Golgi apparatus;GO:0005886//plasma membrane;GO:0012505//endomembrane system;GO:0016020//membrane;GO:0030141//secretory granule;GO:0031012//extracell…	GO:0003674//molecular_function;GO:0004857//enzyme inhibitor activity;GO:0004860//protein kinase inhibitor activity;GO:0004866//endopeptidase inhibitor activity;GO:0004869//cysteine-type endopeptidase inhibitor activity;GO:0019207//kinase regulator activity;GO:0019210//kinase inhibitor activity;GO:0019887//protein kinase regulator activity;GO:0030234//enzyme regulator activity;GO:0030292//protein …	GO:0000003//reproduction;GO:0001501//skeletal system development;GO:0001503//ossification;GO:0001558//regulation of cell growth;GO:0001775//cell activation;GO:0001932//regulation of protein phosphorylation;GO:0001933//negative regulation of protein phosphorylation;GO:0002252//immune effector process;GO:0002263//cell activation involved in immune response;GO:0002274//myeloid leukocyte activation;G…	--
Unigene0038239	0	4	0	0	0	22	8	24	32	13	0	0.45	0	0	0	1.82	0.51	2.58	3.06	1.15	0.09	1.824	4.341036918	0.000106268	0.001454174	--	-	-	-	-	-	-	-	-	--
Unigene0044793	764	719	916	648	1063	20198	29459	16394	21771	17600	42.34	34.91	45.58	25.39	45.96	728.36	813.63	768.21	906.21	676.11	38.836	778.504	4.325237932	6.60E-63	1.38E-59	Hspe1	XP_042234106.1 10 kDa heat shock protein, mitochondrial-like [Homarus americanus]	-	-	-	-	-	GO:0005524//ATP binding;GO:0016887//ATP hydrolysis activity	GO:0006457//protein folding	--
Unigene0023696	0	2	0	0	4	1	18	2	17	106	0	0.12	0	0	0.22	0.05	0.62	0.12	0.89	5.1	0.068	1.356	4.317678622	0.002393201	0.02113343	--	XP_030829070.1 uncharacterized protein LOC100890966 [Strongylocentrotus purpuratus]	-	-	-	-	-	-	-	--
Unigene0024994	4	1	12	0	0	121	187	54	77	48	1.37	0.3	3.69	0	0	26.93	31.88	15.62	19.79	11.38	1.072	21.12	4.300233024	1.37E-08	4.41E-07	--	-	-	-	-	-	-	GO:0016730//oxidoreductase activity, acting on iron-sulfur proteins as donors	GO:0008380//RNA splicing	--
Unigene0020941	0	1	4	6	0	110	51	31	47	19	0	0.09	0.36	0.42	0	7.14	2.53	2.61	3.52	1.31	0.174	3.422	4.297680549	7.98E-08	2.25E-06	--	XP_045103019.1 uncharacterized protein LOC123499283 [Portunus trituberculatus]	-	-	-	-	-	-	-	--
Unigene0024337	0	0	0	1	1	9	13	13	3	5	0	0	0	0.29	0.32	2.42	2.67	4.53	0.93	1.43	0.122	2.396	4.295674855	0.001940744	0.017696966	--	-	-	-	-	-	-	-	-	--
Unigene0027388	0	2	1	0	0	19	18	5	15	22	0	1.18	0.61	0	0	8.34	6.05	2.85	7.6	10.29	0.358	7.026	4.294672084	0.000116385	0.00157706	--	-	-	-	-	-	-	-	-	--
Unigene0024412	0	1	0	1	0	12	19	5	6	7	0	0.12	0	0.1	0	1.09	1.32	0.59	0.63	0.68	0.044	0.862	4.29211244	0.000899051	0.009208036	--	-	-	-	-	-	-	-	-	--
Unigene0008617	0	0	5	2	2	21	63	22	24	88	0	0	0.46	0.15	0.16	1.41	3.24	1.92	1.86	6.29	0.154	2.944	4.256775415	1.84E-07	4.79E-06	--	-	-	-	-	-	-	-	-	--
Unigene0037250	1	1	2	2	2	73	39	12	28	35	0.07	0.06	0.13	0.1	0.11	3.45	1.41	0.74	1.53	1.76	0.094	1.778	4.241450757	6.93E-08	1.97E-06	--	-	-	-	-	-	-	-	-	--
Unigene0022199	2	1	1	3	3	1	17	145	4	29	0.27	0.12	0.12	0.28	0.31	0.09	1.13	16.42	0.4	2.69	0.22	4.146	4.236144688	0.000265678	0.003249139	Mt-Cyb	ABU68799.1 cytochrome b, partial [Tetrahymena thermophila]	Metabolism;Metabolism	Global and overview maps;Energy metabolism	ko01100//Metabolic pathways;ko00190//Oxidative phosphorylation	K00412;K00412	GO:0005575//cellular_component;GO:0005622//intracellular anatomical structure;GO:0005737//cytoplasm;GO:0005739//mitochondrion;GO:0005740//mitochondrial envelope;GO:0005743//mitochondrial inner membrane;GO:0005746//mitochondrial respirasome;GO:0005750//mitochondrial respiratory chain complex III;GO:0009507//chloroplast;GO:0009512//cytochrome b6f complex;GO:0009534//chloroplast thylakoid;GO:0009535…	GO:0003674//molecular_function;GO:0003824//catalytic activity;GO:0005488//binding;GO:0008121//ubiquinol-cytochrome-c reductase activity;GO:0009055//electron transfer activity;GO:0016491//oxidoreductase activity;GO:0016679//oxidoreductase activity, acting on diphenols and related substances as donors;GO:0016740//transferase activity;GO:0016746//acyltransferase activity;GO:0016747//acyltransferase …	GO:0000003//reproduction;GO:0001666//response to hypoxia;GO:0006091//generation of precursor metabolites and energy;GO:0006119//oxidative phosphorylation;GO:0006122//mitochondrial electron transport, ubiquinol to cytochrome c;GO:0006139//nucleobase-containing compound metabolic process;GO:0006163//purine nucleotide metabolic process;GO:0006725//cellular aromatic compound metabolic process;GO:0006…	--
Unigene0026954	0	0	2	0	0	26	12	6	8	0	0	0	0.63	0	0	5.9	2.09	1.77	2.1	0	0.126	2.372	4.234608371	0.005448382	0.041941771	--	-	-	-	-	-	-	-	-	--
Unigene0013590	2	5	4	4	3	192	20	126	28	33	0.14	0.3	0.24	0.19	0.16	8.48	0.68	7.23	1.43	1.55	0.206	3.874	4.233107711	6.70E-08	1.92E-06	Spn88Ea	AJR22372.1 serine proteinase inhibitor-2 [Eriocheir sinensis]	-	-	-	-	-	GO:0003677//DNA binding;GO:0004663//Rab geranylgeranyltransferase activity;GO:0008270//zinc ion binding	-	--
Unigene0011124	4	16	2	4	8	177	238	58	127	236	0.4	1.39	0.18	0.28	0.62	11.42	11.76	4.86	9.46	16.22	0.574	10.744	4.226336663	7.62E-16	7.40E-14	--	-	-	-	-	-	-	-	-	--
Unigene0044153	0	0	2	1	1	7	8	51	9	3	0	0	0.16	0.06	0.07	0.41	0.36	3.85	0.6	0.19	0.058	1.082	4.221503789	0.001043692	0.010452362	--	-	-	-	-	-	-	-	-	--
Unigene0011618	0	4	5	2	2	57	28	43	108	48	0	0.42	0.54	0.17	0.19	4.5	1.69	4.41	9.83	4.03	0.264	4.892	4.211814569	5.19E-09	1.80E-07	--	-	-	-	-	-	-	-	-	--
Unigene0013548	5	16	5	18	7	297	275	164	178	223	0.89	2.5	0.8	2.27	0.97	34.44	24.43	24.71	23.83	27.55	1.486	26.992	4.183025858	3.40E-32	1.32E-29	GPX2	XP_045133493.1 glutathione peroxidase 2-like [Portunus trituberculatus]	Metabolism;Metabolism;Metabolism	Global and overview maps;Metabolism of other amino acids;Lipid metabolism	ko01100//Metabolic pathways;ko00480//Glutathione metabolism;ko00590//Arachidonic acid metabolism	K00432;K00432;K00432	-	GO:0004602//glutathione peroxidase activity	GO:0006979//response to oxidative stress	--
Unigene0023342	1	0	1	0	0	17	3	15	10	3	0.3	0	0.27	0	0	3.29	0.44	3.77	2.23	0.62	0.114	2.07	4.182525038	0.001534226	0.014497882	--	-	-	-	-	-	-	-	-	--
Unigene0017139	5	3	4	1	3	126	121	48	39	59	0.31	0.16	0.22	0.04	0.14	5.03	3.7	2.49	1.8	2.51	0.174	3.106	4.157898619	6.24E-13	4.04E-11	--	XP_045135629.1 uncharacterized protein LOC123518697 [Portunus trituberculatus]	-	-	-	-	GO:0005856//cytoskeleton	-	-	--
Unigene0047554	8	19	19	11	0	1036	59	148	13	63	0.67	1.4	1.44	0.66	0	56.81	2.48	10.55	0.82	3.68	0.834	14.868	4.156019399	0.001702682	0.015835819	--	-	-	-	-	-	-	-	-	--
Unigene0023956	1	0	1	0	1	28	6	10	13	12	0.15	0	0.14	0	0.12	2.79	0.46	1.29	1.49	1.27	0.082	1.46	4.154200649	0.000331057	0.003926491	--	-	-	-	-	-	-	-	-	--
Unigene0036699	247	240	268	382	225	7971	7575	6309	3682	4543	9.18	7.81	8.94	10.04	6.52	192.74	140.28	198.23	102.77	117.02	8.498	150.208	4.143694498	1.05E-61	1.82E-58	Herc4	XP_045111582.1 LOW QUALITY PROTEIN: probable E3 ubiquitin-protein ligase HERC4 [Portunus trituberculatus]	Genetic Information Processing	Folding, sorting and degradation	ko04120//Ubiquitin mediated proteolysis	K10615	GO:0005575//cellular_component;GO:0005622//intracellular anatomical structure;GO:0005634//nucleus;GO:0005737//cytoplasm;GO:0043226//organelle;GO:0043227//membrane-bounded organelle;GO:0043229//intracellular organelle;GO:0043231//intracellular membrane-bounded organelle	GO:0003674//molecular_function;GO:0003824//catalytic activity;GO:0004842//ubiquitin-protein transferase activity;GO:0016740//transferase activity;GO:0016874//ligase activity;GO:0019787//ubiquitin-like protein transferase activity;GO:0061630//ubiquitin protein ligase activity;GO:0061659//ubiquitin-like protein ligase activity;GO:0140096//catalytic activity, acting on a protein	GO:0000209//protein polyubiquitination;GO:0002682//regulation of immune system process;GO:0002684//positive regulation of immune system process;GO:0006464//cellular protein modification process;GO:0006508//proteolysis;GO:0006511//ubiquitin-dependent protein catabolic process;GO:0006807//nitrogen compound metabolic process;GO:0008150//biological_process;GO:0008152//metabolic process;GO:0009056//ca…	--
Unigene0000482	0	2	3	4	2	7	146	3	9	97	0	0.1	0.16	0.17	0.09	0.27	4.32	0.15	0.4	3.99	0.104	1.826	4.134031332	0.000105841	0.001449282	--	XP_046346120.1 putative nuclease HARBI1 isoform X2 [Haliotis rufescens]	-	-	-	-	-	-	-	--
Unigene0028155	1	1	3	2	1	71	10	32	33	17	0.09	0.08	0.24	0.13	0.07	4.18	0.45	2.45	2.24	1.07	0.122	2.078	4.090242601	2.61E-06	5.45E-05	KBP	XP_045132474.1 glutamate receptor ionotropic, kainate 2-like [Portunus trituberculatus]	Environmental Information Processing	Signaling molecules and interaction	ko04080//Neuroactive ligand-receptor interaction	K05202	GO:0005575//cellular_component;GO:0005886//plasma membrane;GO:0016020//membrane;GO:0016021//integral component of membrane;GO:0030054//cell junction;GO:0031224//intrinsic component of membrane;GO:0045202//synapse;GO:0045211//postsynaptic membrane;GO:0071944//cell periphery;GO:0097060//synaptic membrane;GO:0098590//plasma membrane region;GO:0098794//postsynapse	GO:0003674//molecular_function;GO:0004888//transmembrane signaling receptor activity;GO:0004970//ionotropic glutamate receptor activity;GO:0005215//transporter activity;GO:0005216//ion channel activity;GO:0005230//extracellular ligand-gated ion channel activity;GO:0005231//excitatory extracellular ligand-gated ion channel activity;GO:0005234//extracellularly glutamate-gated ion channel activity;G…	GO:0003008//system process;GO:0006810//transport;GO:0006811//ion transport;GO:0007154//cell communication;GO:0007165//signal transduction;GO:0007166//cell surface receptor signaling pathway;GO:0007215//glutamate receptor signaling pathway;GO:0007267//cell-cell signaling;GO:0007268//chemical synaptic transmission;GO:0007610//behavior;GO:0008150//biological_process;GO:0009987//cellular process;GO:0…	--
Unigene0040308	3	11	6	16	3	189	97	95	61	347	0.27	0.87	0.48	1.02	0.21	11.05	4.34	7.22	4.12	21.61	0.57	9.668	4.084183649	3.26E-12	1.92E-10	--	-	-	-	-	-	-	-	-	--
Unigene0000924	2	0	2	1	0	33	20	9	15	36	0.26	0	0.23	0.09	0	2.77	1.29	0.98	1.45	3.22	0.116	1.942	4.06534649	1.02E-05	0.000184646	--	-	-	-	-	-	-	-	-	--
Unigene0007051	0	0	0	0	3	9	19	19	4	7	0	0	0	0	0.37	0.92	1.49	2.52	0.47	0.76	0.074	1.232	4.057333175	0.002306804	0.020518385	--	-	-	-	-	-	-	-	-	--
Unigene0016511	1	1	0	0	0	13	6	14	7	4	0.13	0.12	0	0	0	1.12	0.4	1.57	0.7	0.37	0.05	0.832	4.056583528	0.001492413	0.014150911	--	XP_042222229.1 synaptonemal complex protein 2-like [Homarus americanus]	-	-	-	-	GO:0005759//mitochondrial matrix	-	-	--
Unigene0013581	1	2	0	0	0	14	5	12	15	18	0.25	0.44	0	0	0	2.3	0.63	2.56	2.84	3.14	0.138	2.294	4.055125219	0.000489913	0.00550495	--	-	-	-	-	-	-	-	-	--
Unigene0022837	7	6	2	11	13	163	235	132	101	174	0.61	0.46	0.16	0.68	0.89	9.29	10.25	9.77	6.64	10.56	0.56	9.302	4.054042208	9.39E-26	2.41E-23	--	-	-	-	-	-	-	-	-	--
Unigene0028654	3	3	0	1	0	20	47	11	44	37	0.21	0.18	0	0.05	0	0.91	1.64	0.65	2.31	1.79	0.088	1.46	4.052321035	8.69E-07	1.99E-05	--	CAH1249853.1 Hypp8701 [Branchiostoma lanceolatum]	-	-	-	-	-	-	-	--
Unigene0032580	1	0	1	1	0	0	32	5	16	16	0.23	0	0.2	0.16	0	0	3.59	0.95	2.71	2.5	0.118	1.95	4.046615359	0.00274702	0.023680536	--	-	-	-	-	-	-	-	-	--
Unigene0034858	0	0	1	2	0	5	18	13	6	15	0	0	0.1	0.15	0	0.35	0.97	1.19	0.49	1.13	0.05	0.826	4.046141782	0.001058334	0.01058221	--	-	-	-	-	-	-	-	-	--
Unigene0030281	0	0	2	0	0	12	9	2	12	9	0	0	0.27	0	0	1.18	0.68	0.26	1.37	0.95	0.054	0.888	4.039528364	0.00244091	0.02149549	--	-	-	-	-	-	-	-	-	--
Unigene0036041	1	0	0	0	2	5	48	1	8	11	0.13	0	0	0	0.2	0.42	3.08	0.11	0.77	0.98	0.066	1.072	4.021695071	0.003694834	0.030297429	--	-	-	-	-	-	-	-	-	--
Unigene0021685	0	0	1	0	1	11	21	1	5	7	0	0	0.13	0	0.11	1.03	1.5	0.12	0.54	0.7	0.048	0.778	4.018663844	0.003987155	0.032248725	--	CAE1265562.1 unnamed protein product [Sepia pharaonis]	Environmental Information Processing;Environmental Information Processing	Signal transduction;Signal transduction	ko04391//Hippo signaling pathway - fly;ko04392//Hippo signaling pathway - multiple species	K16669;K16669	-	-	-	--
Unigene0013771	3	0	0	1	0	22	18	27	2	18	0.77	0	0	0.18	0	3.65	2.29	5.82	0.38	3.18	0.19	3.064	4.011344974	0.000388333	0.004517072	--	-	-	-	-	-	-	-	-	--
Unigene0016357	2	0	0	9	0	44	13	71	11	44	0.19	0	0	0.62	0	2.78	0.63	5.83	0.8	2.96	0.162	2.6	4.004445905	7.73E-05	0.001106707	SLC7A5	XP_045108221.1 large neutral amino acids transporter small subunit 1-like [Portunus trituberculatus]	Environmental Information Processing	Signal transduction	ko04150//mTOR signaling pathway	K13780	GO:0005575//cellular_component;GO:0005886//plasma membrane;GO:0005887//integral component of plasma membrane;GO:0016020//membrane;GO:0016021//integral component of membrane;GO:0031224//intrinsic component of membrane;GO:0031226//intrinsic component of plasma membrane;GO:0071944//cell periphery	GO:0003674//molecular_function;GO:0005215//transporter activity;GO:0005275//amine transmembrane transporter activity;GO:0005342//organic acid transmembrane transporter activity;GO:0008509//anion transmembrane transporter activity;GO:0008514//organic anion transmembrane transporter activity;GO:0015075//ion transmembrane transporter activity;GO:0015171//amino acid transmembrane transporter activity…	GO:0003333//amino acid transmembrane transport;GO:0006810//transport;GO:0006811//ion transport;GO:0006812//cation transport;GO:0006820//anion transport;GO:0006865//amino acid transport;GO:0006950//response to stress;GO:0006952//defense response;GO:0008150//biological_process;GO:0009605//response to external stimulus;GO:0009607//response to biotic stimulus;GO:0009620//response to fungus;GO:0015711…	--
Unigene0005793	2	6	2	2	6	70	97	63	77	52	0.23	0.6	0.21	0.16	0.54	5.22	5.54	6.11	6.63	4.13	0.348	5.526	3.989076351	1.48E-14	1.21E-12	Rab3	XP_042230117.1 ras-related protein Rab-3 isoform X1 [Homarus americanus]	-	-	-	-	GO:0005575//cellular_component;GO:0005622//intracellular anatomical structure;GO:0005737//cytoplasm;GO:0005886//plasma membrane;GO:0008021//synaptic vesicle;GO:0012505//endomembrane system;GO:0016020//membrane;GO:0030133//transport vesicle;GO:0031410//cytoplasmic vesicle;GO:0031982//vesicle;GO:0042995//cell projection;GO:0043005//neuron projection;GO:0043226//organelle;GO:0043227//membrane-bounde…	GO:0000166//nucleotide binding;GO:0001882//nucleoside binding;GO:0001883//purine nucleoside binding;GO:0003674//molecular_function;GO:0003824//catalytic activity;GO:0003924//GTPase activity;GO:0005488//binding;GO:0005515//protein binding;GO:0005525//GTP binding;GO:0016462//pyrophosphatase activity;GO:0016787//hydrolase activity;GO:0016817//hydrolase activity, acting on acid anhydrides;GO:0016818/…	GO:0000003//reproduction;GO:0001505//regulation of neurotransmitter levels;GO:0006810//transport;GO:0006836//neurotransmitter transport;GO:0006887//exocytosis;GO:0006935//chemotaxis;GO:0006996//organelle organization;GO:0007010//cytoskeleton organization;GO:0007154//cell communication;GO:0007165//signal transduction;GO:0007186//G protein-coupled receptor signaling pathway;GO:0007264//small GTPase…	--
Unigene0014921	18	62	45	38	54	1117	1149	603	687	789	1.54	4.66	3.47	2.31	3.62	62.38	49.15	43.76	44.29	46.94	3.12	49.304	3.982086762	3.81E-37	2.06E-34	Taf11	XP_045138435.1 transcription initiation factor TFIID subunit 11-like isoform X2 [Portunus trituberculatus]	Genetic Information Processing	Transcription	ko03022//Basal transcription factors	K03135	GO:0000228//nuclear chromosome;GO:0000428//DNA-directed RNA polymerase complex;GO:0000785//chromatin;GO:0005575//cellular_component;GO:0005622//intracellular anatomical structure;GO:0005634//nucleus;GO:0005654//nucleoplasm;GO:0005667//transcription regulator complex;GO:0005669//transcription factor TFIID complex;GO:0005694//chromosome;GO:0005737//cytoplasm;GO:0005794//Golgi apparatus;GO:0012505//…	GO:0003674//molecular_function;GO:0003676//nucleic acid binding;GO:0003677//DNA binding;GO:0003682//chromatin binding;GO:0003712//transcription coregulator activity;GO:0003713//transcription coactivator activity;GO:0005102//signaling receptor binding;GO:0005488//binding;GO:0005515//protein binding;GO:0008134//transcription factor binding;GO:0030269//tetrahydromethanopterin S-methyltransferase act…	GO:0006139//nucleobase-containing compound metabolic process;GO:0006351//transcription, DNA-templated;GO:0006352//DNA-templated transcription, initiation;GO:0006355//regulation of transcription, DNA-templated;GO:0006357//regulation of transcription by RNA polymerase II;GO:0006366//transcription by RNA polymerase II;GO:0006367//transcription initiation from RNA polymerase II promoter;GO:0006725//c…	--
Unigene0036219	0	0	0	0	2	6	3	5	14	7	0	0	0	0	0.35	0.86	0.33	0.94	2.33	1.07	0.07	1.106	3.981852653	0.006757485	0.04998691	--	-	-	-	-	-	-	-	-	--
Unigene0038083	0	0	1	5	1	6	95	12	0	30	0	0	0.21	0.84	0.19	0.93	11.28	2.42	0	4.95	0.248	3.916	3.980968739	0.002248255	0.020074775	--	-	-	-	-	-	-	-	-	--
Unigene0029119	3	1	2	1	1	18	141	27	5	2	0.17	0.05	0.1	0.04	0.04	0.67	4.02	1.31	0.21	0.08	0.08	1.258	3.974988112	0.000236099	0.002926057	--	XP_045135143.1 putative nuclease HARBI1 [Portunus trituberculatus]	-	-	-	-	-	GO:0016788//hydrolase activity, acting on ester bonds	-	--
Unigene0035505	1	0	0	1	0	15	5	11	3	4	0.28	0	0	0.2	0	2.74	0.7	2.61	0.63	0.78	0.096	1.492	3.95806932	0.004124932	0.033131494	--	-	-	-	-	-	-	-	-	--
Unigene0007226	76	56	86	90	71	1963	1882	1170	966	1462	8.19	5.29	8.32	6.86	5.97	137.61	101.05	106.58	78.17	109.18	6.926	106.518	3.942931048	2.12E-62	4.01E-59	--	-	-	-	-	-	-	-	-	--
Unigene0005405	3	5	3	2	6	4	19	167	8	129	0.51	0.74	0.46	0.24	0.79	0.44	1.6	23.9	1.02	15.13	0.548	8.418	3.941229711	9.53E-05	0.001323475	Mup4	-	-	-	-	-	-	-	GO:0006276//plasmid maintenance	--
Unigene0040596	17	11	6	9	4	483	65	188	83	96	1.65	0.94	0.52	0.62	0.3	30.51	3.14	15.43	6.05	6.46	0.806	12.318	3.933844384	2.23E-09	8.17E-08	--	-	-	-	-	-	-	-	-	--
Unigene0032983	2	4	3	0	2	59	53	46	33	28	0.99	1.73	1.33	0	0.77	18.98	13.06	19.23	12.25	9.6	0.964	14.624	3.923161019	1.68E-09	6.29E-08	--	-	-	-	-	-	-	-	-	--
Unigene0026353	2	1	1	0	0	23	26	14	7	18	0.23	0.1	0.1	0	0	1.7	1.47	1.34	0.6	1.41	0.086	1.304	3.9224634	4.69E-05	0.000710156	--	XP_045131382.1 NT-3 growth factor receptor-like isoform X2 [Portunus trituberculatus]	Environmental Information Processing	Signal transduction	ko04020//Calcium signaling pathway	K05101	-	-	-	--
Unigene0008615	2	3	3	0	5	41	56	49	33	71	0.21	0.28	0.29	0	0.42	2.85	2.98	4.42	2.64	5.25	0.24	3.628	3.918068145	1.93E-10	8.41E-09	--	-	-	-	-	-	-	-	-	--
Unigene0013681	126	138	133	180	94	3595	3488	1786	1596	2553	6.88	6.6	6.52	6.95	4	127.68	94.88	82.42	65.43	96.59	6.19	93.4	3.915411235	2.25E-63	4.93E-60	brms1l	XP_045124142.1 breast cancer metastasis-suppressor 1-like protein isoform X4 [Portunus trituberculatus]	-	-	-	-	GO:0000118//histone deacetylase complex;GO:0000228//nuclear chromosome;GO:0000785//chromatin;GO:0005575//cellular_component;GO:0005622//intracellular anatomical structure;GO:0005634//nucleus;GO:0005654//nucleoplasm;GO:0005694//chromosome;GO:0031974//membrane-enclosed lumen;GO:0031981//nuclear lumen;GO:0032991//protein-containing complex;GO:0043226//organelle;GO:0043227//membrane-bounded organelle…	GO:0003674//molecular_function;GO:0005488//binding;GO:0005515//protein binding;GO:0019899//enzyme binding;GO:0042826//histone deacetylase binding	GO:0000122//negative regulation of transcription by RNA polymerase II;GO:0006139//nucleobase-containing compound metabolic process;GO:0006325//chromatin organization;GO:0006351//transcription, DNA-templated;GO:0006355//regulation of transcription, DNA-templated;GO:0006357//regulation of transcription by RNA polymerase II;GO:0006464//cellular protein modification process;GO:0006476//protein deacet…	--
Unigene0017756	438	550	477	623	525	11229	11524	9377	8566	8092	51.79	56.98	50.64	52.09	48.43	863.91	679.06	937.45	760.71	663.21	51.986	780.868	3.908883634	2.50E-98	1.74E-94	--	ACR54123.1 putative SERF-like protein [Palaemon varians]	-	-	-	-	-	-	-	--
Unigene0023413	3	0	2	1	0	38	13	22	15	30	0.27	0	0.16	0.06	0	2.22	0.58	1.67	1.01	1.87	0.098	1.47	3.906890596	1.00E-05	0.000181341	--	-	-	-	-	-	-	-	-	--
Unigene0039669	5	3	7	15	4	205	71	86	171	60	0.39	0.21	0.49	0.83	0.24	10.46	2.77	5.7	10.07	3.26	0.432	6.452	3.900643221	1.13E-11	6.06E-10	kbp	XP_045115908.1 probable glutamate receptor isoform X1 [Portunus trituberculatus]	Environmental Information Processing	Signaling molecules and interaction	ko04080//Neuroactive ligand-receptor interaction	K05203	GO:0016020//membrane	GO:0004970//ionotropic glutamate receptor activity;GO:0015276//ligand-gated ion channel activity	-	--
Unigene0003638	3	1	8	2	0	41	137	6	88	26	0.17	0.05	0.41	0.08	0	1.53	3.92	0.29	3.8	1.04	0.142	2.116	3.897376793	9.77E-06	0.00017777	SYT5	XP_045102416.1 uncharacterized protein LOC123498926 isoform X6 [Portunus trituberculatus]	-	-	-	-	-	-	-	--
Unigene0013625	0	0	2	1	0	6	15	4	6	25	0	0	0.44	0.17	0	0.96	1.84	0.83	1.11	4.28	0.122	1.804	3.886246286	0.002355281	0.020869362	--	-	-	-	-	-	-	-	-	--
Unigene0046484	1	0	0	0	1	15	4	7	9	3	0.32	0	0	0	0.25	3.09	0.63	1.87	2.14	0.66	0.114	1.678	3.879636986	0.003901775	0.031656722	--	-	-	-	-	-	-	-	-	--
Unigene0003972	154	167	240	240	224	4092	4097	4495	2990	2600	5.96	5.67	8.34	6.57	6.77	103.08	79.05	147.14	86.94	69.77	6.662	97.196	3.866869683	2.94E-43	2.78E-40	SmydA-8	XP_045126776.1 SET domain-containing protein SmydA-8-like [Portunus trituberculatus]	-	-	-	-	-	GO:0003674//molecular_function;GO:0005488//binding;GO:0005515//protein binding;GO:0008270//zinc ion binding;GO:0019899//enzyme binding;GO:0042826//histone deacetylase binding;GO:0043167//ion binding;GO:0043169//cation binding;GO:0046872//metal ion binding;GO:0046914//transition metal ion binding	GO:0008150//biological_process;GO:0009892//negative regulation of metabolic process;GO:0010468//regulation of gene expression;GO:0010605//negative regulation of macromolecule metabolic process;GO:0010629//negative regulation of gene expression;GO:0019222//regulation of metabolic process;GO:0048519//negative regulation of biological process;GO:0050789//regulation of biological process;GO:0060255//…	--
Unigene0000282	1	0	5	0	0	7	18	3	12	78	0.14	0	0.63	0	0	0.64	1.26	0.36	1.27	7.61	0.154	2.228	3.854746977	0.002085153	0.018840553	--	-	-	-	-	-	-	-	-	--
Unigene0043353	82	21	14	45	35	651	227	1896	97	385	2.73	0.61	0.42	1.06	0.91	14.12	3.77	53.45	2.43	8.9	1.146	16.534	3.850756843	7.76E-05	0.001109948	BCO1	XP_045120543.1 beta,beta-carotene 15,15'-dioxygenase-like [Portunus trituberculatus]	Metabolism;Metabolism	Global and overview maps;Metabolism of cofactors and vitamins	ko01100//Metabolic pathways;ko00830//Retinol metabolism	K00515;K00515	GO:0005575//cellular_component;GO:0005622//intracellular anatomical structure;GO:0005737//cytoplasm;GO:0005783//endoplasmic reticulum;GO:0005829//cytosol;GO:0005886//plasma membrane;GO:0012505//endomembrane system;GO:0016020//membrane;GO:0031090//organelle membrane;GO:0043226//organelle;GO:0043227//membrane-bounded organelle;GO:0043229//intracellular organelle;GO:0043231//intracellular membrane-b…	GO:0001786//phosphatidylserine binding;GO:0003674//molecular_function;GO:0003824//catalytic activity;GO:0003834//beta-carotene 15,15'-dioxygenase activity;GO:0004497//monooxygenase activity;GO:0004744//retinal isomerase activity;GO:0005488//binding;GO:0005515//protein binding;GO:0005543//phospholipid binding;GO:0008289//lipid binding;GO:0016491//oxidoreductase activity;GO:0016701//oxidoreductase …	GO:0001101//response to acid chemical;GO:0001523//retinoid metabolic process;GO:0001654//eye development;GO:0001894//tissue homeostasis;GO:0001895//retina homeostasis;GO:0003008//system process;GO:0003407//neural retina development;GO:0006066//alcohol metabolic process;GO:0006081//cellular aldehyde metabolic process;GO:0006629//lipid metabolic process;GO:0006720//isoprenoid metabolic process;GO:0…	--
Unigene0029694	1	0	0	0	1	11	9	6	1	12	0.17	0	0	0	0.13	1.2	0.75	0.85	0.13	1.39	0.06	0.864	3.847996907	0.004813195	0.037728419	PAOX	AYN63914.1 amine oxidase [Scylla paramamosain]	Cellular Processes	Transport and catabolism	ko04146//Peroxisome	K00308	-	GO:0003674//molecular_function;GO:0003676//nucleic acid binding;GO:0003824//catalytic activity;GO:0016491//oxidoreductase activity	GO:0006355//regulation of transcription, DNA-templated;GO:0008150//biological_process;GO:0008152//metabolic process	--
Unigene0032678	0	2	0	2	4	17	26	24	32	30	0	0.31	0	0.25	0.55	1.96	2.3	3.59	4.26	3.68	0.222	3.158	3.83037959	2.06E-06	4.39E-05	--	XP_045130366.1 uncharacterized protein LOC123515631 [Portunus trituberculatus]	-	-	-	-	GO:0005575//cellular_component;GO:0005622//intracellular anatomical structure;GO:0005634//nucleus;GO:0043226//organelle;GO:0043227//membrane-bounded organelle;GO:0043229//intracellular organelle;GO:0043231//intracellular membrane-bounded organelle	GO:0000981//DNA-binding transcription factor activity, RNA polymerase II-specific;GO:0003674//molecular_function;GO:0003676//nucleic acid binding;GO:0003677//DNA binding;GO:0003700//DNA-binding transcription factor activity;GO:0005488//binding;GO:0043167//ion binding;GO:0043169//cation binding;GO:0046872//metal ion binding;GO:0097159//organic cyclic compound binding;GO:0140110//transcription regu…	GO:0006139//nucleobase-containing compound metabolic process;GO:0006351//transcription, DNA-templated;GO:0006355//regulation of transcription, DNA-templated;GO:0006357//regulation of transcription by RNA polymerase II;GO:0006725//cellular aromatic compound metabolic process;GO:0006807//nitrogen compound metabolic process;GO:0008150//biological_process;GO:0008152//metabolic process;GO:0009058//bio…	--
Unigene0015609	23	28	14	38	28	647	222	556	479	268	1.68	1.8	0.92	1.97	1.6	30.82	8.1	34.42	26.34	13.6	1.594	22.656	3.829169636	1.10E-17	1.34E-15	--	XP_045114229.1 uncharacterized protein LOC123506324 [Portunus trituberculatus]	-	-	-	-	-	-	-	--
Unigene0046124	3	1	1	0	0	13	42	15	8	28	0.56	0.16	0.17	0	0	1.58	3.9	2.36	1.12	3.62	0.178	2.516	3.821182776	4.24E-05	0.000649497	--	-	-	-	-	-	-	-	-	--
Unigene0002036	2	1	0	0	0	25	2	17	2	10	0.32	0.14	0	0	0	2.62	0.16	2.31	0.24	1.12	0.092	1.29	3.809593394	0.004770138	0.037475541	--	KAG0710422.1 DNA polymerase alpha catalytic subunit [Chionoecetes opilio]	-	-	-	-	-	-	-	--
Unigene0007260	10	7	4	11	0	225	163	79	91	35	0.42	0.26	0.15	0.33	0	6.13	3.4	2.8	2.86	1.02	0.232	3.242	3.80468738	1.08E-09	4.17E-08	--	-	-	-	-	-	-	-	-	--
Unigene0038980	218	223	249	414	251	6110	6289	3224	4444	3687	20.2	18.11	20.72	27.13	18.15	368.4	290.42	252.6	309.29	236.82	20.862	291.506	3.8045762	1.83E-75	5.44E-72	--	-	-	-	-	-	-	GO:0004089//carbonate dehydratase activity;GO:0008270//zinc ion binding	-	--
Unigene0026316	4	1	3	4	5	86	89	24	41	71	0.44	0.1	0.3	0.31	0.43	6.15	4.88	2.23	3.39	5.41	0.316	4.412	3.803436327	2.88E-11	1.45E-09	--	-	-	-	-	-	-	-	-	--
Unigene0046501	1	1	3	12	2	46	28	94	34	77	0.11	0.1	0.3	0.94	0.17	3.33	1.55	8.83	2.84	5.93	0.324	4.496	3.794576317	2.54E-07	6.44E-06	--	-	-	-	-	-	-	-	-	--
Unigene0030114	168	157	175	370	212	5068	5164	2379	2094	3929	11.64	9.53	10.89	18.12	11.46	228.45	178.28	139.35	108.95	188.67	12.328	168.74	3.774791335	8.41E-48	1.04E-44	PDCD2	XP_045122514.1 programmed cell death protein 2-like [Portunus trituberculatus]	-	-	-	-	GO:0005575//cellular_component;GO:0005622//intracellular anatomical structure;GO:0005634//nucleus;GO:0005737//cytoplasm;GO:0005783//endoplasmic reticulum;GO:0005789//endoplasmic reticulum membrane;GO:0005793//endoplasmic reticulum-Golgi intermediate compartment;GO:0005798//Golgi-associated vesicle;GO:0012505//endomembrane system;GO:0012506//vesicle membrane;GO:0012507//ER to Golgi transport vesic…	GO:0003674//molecular_function;GO:0003676//nucleic acid binding;GO:0003677//DNA binding;GO:0005488//binding;GO:0005515//protein binding;GO:0008270//zinc ion binding;GO:0019899//enzyme binding;GO:0043021//ribonucleoprotein complex binding;GO:0043024//ribosomal small subunit binding;GO:0043167//ion binding;GO:0043169//cation binding;GO:0044877//protein-containing complex binding;GO:0046872//metal i…	GO:0000003//reproduction;GO:0002376//immune system process;GO:0002520//immune system development;GO:0002682//regulation of immune system process;GO:0002684//positive regulation of immune system process;GO:0003006//developmental process involved in reproduction;GO:0006139//nucleobase-containing compound metabolic process;GO:0006364//rRNA processing;GO:0006396//RNA processing;GO:0006417//regulation…	--
Unigene0020455	2	0	1	4	0	19	39	36	8	14	0.26	0	0.12	0.37	0	1.62	2.55	4	0.79	1.27	0.15	2.046	3.769771739	4.35E-05	0.00066409	--	-	-	-	-	-	-	-	-	--
Unigene0036698	1	0	2	0	0	24	13	12	5	3	0.36	0	0.64	0	0	5.57	2.31	3.62	1.34	0.74	0.2	2.716	3.763411574	0.002356109	0.020872264	--	-	-	-	-	-	GO:0005576//extracellular region;GO:0016020//membrane;GO:0016021//integral component of membrane	GO:0004576//oligosaccharyl transferase activity;GO:0005507//copper ion binding;GO:0008200//ion channel inhibitor activity;GO:0009055//electron transfer activity	GO:0006487//protein N-linked glycosylation	--
Unigene0024322	179	191	205	254	228	5157	4682	2768	2539	2996	7.84	7.33	8.07	7.87	7.8	147.07	102.26	102.58	83.58	91.02	7.782	105.302	3.758248047	9.23E-64	2.14E-60	Zpr1	XP_045106937.1 zinc finger protein ZPR1-like [Portunus trituberculatus]	-	-	-	-	GO:0005575//cellular_component;GO:0005622//intracellular anatomical structure;GO:0005634//nucleus;GO:0005654//nucleoplasm;GO:0005730//nucleolus;GO:0005737//cytoplasm;GO:0015030//Cajal body;GO:0016604//nuclear body;GO:0030424//axon;GO:0030426//growth cone;GO:0030427//site of polarized growth;GO:0031974//membrane-enclosed lumen;GO:0031981//nuclear lumen;GO:0032797//SMN complex;GO:0032991//protein-c…	GO:0003674//molecular_function;GO:0005102//signaling receptor binding;GO:0005488//binding;GO:0005515//protein binding;GO:0008270//zinc ion binding;GO:0019899//enzyme binding;GO:0019900//kinase binding;GO:0019901//protein kinase binding;GO:0030971//receptor tyrosine kinase binding;GO:0031369//translation initiation factor binding;GO:0043167//ion binding;GO:0043169//cation binding;GO:0046872//metal…	GO:0000082//G1/S transition of mitotic cell cycle;GO:0000083//regulation of transcription involved in G1/S transition of mitotic cell cycle;GO:0000086//G2/M transition of mitotic cell cycle;GO:0000226//microtubule cytoskeleton organization;GO:0000278//mitotic cell cycle;GO:0001701//in utero embryonic development;GO:0001763//morphogenesis of a branching structure;GO:0001824//blastocyst development…	--
Unigene0020708	195	237	182	303	235	5084	5862	2941	2551	3447	13.91	14.81	11.66	15.28	13.08	235.96	208.38	177.37	136.67	170.43	13.748	185.762	3.756161748	2.05E-73	5.34E-70	Cdc37	XP_045125575.1 hsp90 co-chaperone Cdc37-like [Portunus trituberculatus]	-	-	-	-	GO:0000793//condensed chromosome;GO:0001726//ruffle;GO:0005575//cellular_component;GO:0005622//intracellular anatomical structure;GO:0005634//nucleus;GO:0005694//chromosome;GO:0005737//cytoplasm;GO:0005819//spindle;GO:0005829//cytosol;GO:0005856//cytoskeleton;GO:0005886//plasma membrane;GO:0015630//microtubule cytoskeleton;GO:0016020//membrane;GO:0031252//cell leading edge;GO:0031253//cell projec…	GO:0003674//molecular_function;GO:0003824//catalytic activity;GO:0004672//protein kinase activity;GO:0004713//protein tyrosine kinase activity;GO:0005488//binding;GO:0005515//protein binding;GO:0008022//protein C-terminus binding;GO:0008047//enzyme activator activity;GO:0016301//kinase activity;GO:0016740//transferase activity;GO:0016772//transferase activity, transferring phosphorus-containing g…	GO:0000079//regulation of cyclin-dependent protein serine/threonine kinase activity;GO:0000161//osmosensory signaling MAPK cascade;GO:0000165//MAPK cascade;GO:0000226//microtubule cytoskeleton organization;GO:0001932//regulation of protein phosphorylation;GO:0001934//positive regulation of protein phosphorylation;GO:0001959//regulation of cytokine-mediated signaling pathway;GO:0002682//regulation…	--
Unigene0008299	1	0	1	1	1	21	3	28	7	1	0.13	0	0.12	0.09	0.1	1.79	0.2	3.1	0.69	0.09	0.088	1.174	3.737785074	0.00393488	0.03186924	--	-	-	-	-	-	-	-	-	--
Unigene0009857	0	3	0	0	0	4	17	9	3	20	0	0.27	0	0	0	0.27	0.88	0.79	0.23	1.43	0.054	0.72	3.736965594	0.005354174	0.041292868	--	XP_045110895.1 uncharacterized protein LOC123504448 [Portunus trituberculatus]	-	-	-	-	GO:0005576//extracellular region	GO:0030550//acetylcholine receptor inhibitor activity	-	--
Unigene0010446	0	0	1	1	1	5	20	2	16	7	0	0	0.34	0.27	0.29	1.23	3.76	0.64	4.53	1.83	0.18	2.398	3.735762847	0.004000539	0.032319329	--	-	-	-	-	-	-	-	-	--
Unigene0030783	1	0	3	0	0	26	5	27	5	5	0.13	0	0.34	0	0	2.14	0.32	2.89	0.47	0.44	0.094	1.252	3.735429995	0.002591362	0.022529871	--	XP_045114810.1 uncharacterized protein LOC123506626 [Portunus trituberculatus]	-	-	-	-	-	-	-	--
Unigene0015229	6	2	0	4	1	66	53	27	30	51	0.66	0.19	0	0.31	0.09	4.73	2.91	2.52	2.48	3.9	0.25	3.308	3.725959235	3.55E-09	1.27E-07	--	-	-	-	-	-	-	GO:0016758//hexosyltransferase activity	-	--
Unigene0002423	4	3	7	4	9	19	18	37	219	121	0.48	0.31	0.75	0.34	0.84	1.48	1.07	3.74	19.67	10.03	0.544	7.198	3.725917546	7.15E-06	0.000134725	--	XP_045132767.1 low-density lipoprotein receptor-related protein 1B-like [Portunus trituberculatus]	-	-	-	-	-	GO:0005515//protein binding	-	--
Unigene0003449	0	4	4	1	2	45	38	32	47	19	0	0.81	0.83	0.16	0.36	6.74	4.36	6.23	8.13	3.03	0.432	5.698	3.721352404	1.55E-07	4.09E-06	UBFD1	XP_045135313.1 ubiquitin domain-containing protein UBFD1-like isoform X2 [Portunus trituberculatus]	-	-	-	-	-	GO:0005515//protein binding;GO:0046914//transition metal ion binding	-	--
Unigene0029117	5	15	19	22	29	508	296	274	110	251	0.56	1.48	1.92	1.75	2.54	37.11	16.56	26.01	9.27	19.53	1.65	21.696	3.716891154	1.02E-14	8.53E-13	Eip71CD	XP_045136875.1 LOW QUALITY PROTEIN: peptide methionine sulfoxide reductase-like [Portunus trituberculatus]	-	-	-	-	-	GO:0003674//molecular_function;GO:0003824//catalytic activity;GO:0008113//peptide-methionine (S)-S-oxide reductase activity;GO:0016491//oxidoreductase activity;GO:0016667//oxidoreductase activity, acting on a sulfur group of donors;GO:0016671//oxidoreductase activity, acting on a sulfur group of donors, disulfide as acceptor;GO:0033744//L-methionine:thioredoxin-disulfide S-oxidoreductase activity	GO:0000096//sulfur amino acid metabolic process;GO:0006082//organic acid metabolic process;GO:0006520//cellular amino acid metabolic process;GO:0006790//sulfur compound metabolic process;GO:0006807//nitrogen compound metabolic process;GO:0006950//response to stress;GO:0006979//response to oxidative stress;GO:0007275//multicellular organism development;GO:0007568//aging;GO:0008150//biological_proc…	--
Unigene0001007	1	1	0	2	1	25	15	10	23	6	0.24	0.21	0	0.34	0.19	3.9	1.79	2.03	4.14	1	0.196	2.572	3.713965083	0.00020212	0.002551239	--	-	-	-	-	-	-	-	-	--
Unigene0005774	2	2	2	1	0	39	13	12	27	29	0.32	0.28	0.28	0.11	0	4	1.02	1.6	3.2	3.17	0.198	2.598	3.713829095	9.48E-06	0.000173232	--	-	-	-	-	-	-	-	-	--
Unigene0045284	20	11	2	9	13	8	201	510	9	123	1.84	0.89	0.17	0.58	0.93	0.48	9.21	39.63	0.62	7.84	0.882	11.556	3.711719643	0.002817042	0.024204018	Mtco1	QTF74784.1 cytochrome c oxidase subunit I [Aspa marginata]	Metabolism;Metabolism	Global and overview maps;Energy metabolism	ko01100//Metabolic pathways;ko00190//Oxidative phosphorylation	K02256;K02256	GO:0005575//cellular_component;GO:0005622//intracellular anatomical structure;GO:0005737//cytoplasm;GO:0005739//mitochondrion;GO:0005740//mitochondrial envelope;GO:0005743//mitochondrial inner membrane;GO:0005746//mitochondrial respirasome;GO:0005750//mitochondrial respiratory chain complex III;GO:0005751//mitochondrial respiratory chain complex IV;GO:0016020//membrane;GO:0016021//integral compon…	GO:0003674//molecular_function;GO:0003824//catalytic activity;GO:0004129//cytochrome-c oxidase activity;GO:0005215//transporter activity;GO:0005488//binding;GO:0005506//iron ion binding;GO:0008324//cation transmembrane transporter activity;GO:0009055//electron transfer activity;GO:0015075//ion transmembrane transporter activity;GO:0015078//proton transmembrane transporter activity;GO:0015318//ino…	GO:0006091//generation of precursor metabolites and energy;GO:0006119//oxidative phosphorylation;GO:0006123//mitochondrial electron transport, cytochrome c to oxygen;GO:0006139//nucleobase-containing compound metabolic process;GO:0006163//purine nucleotide metabolic process;GO:0006725//cellular aromatic compound metabolic process;GO:0006753//nucleoside phosphate metabolic process;GO:0006793//phos…	--
Unigene0011627	3	4	1	8	1	74	110	18	52	34	0.16	0.19	0.05	0.31	0.04	2.61	2.97	0.82	2.11	1.28	0.15	1.958	3.706346359	1.10E-08	3.58E-07	--	GFS21870.1 hypothetical protein ElyMa_003349200 [Elysia marginata]	-	-	-	-	-	-	-	--
Unigene0027279	0	0	1	4	2	25	26	14	7	32	0	0	0.19	0.6	0.33	3.46	2.76	2.52	1.12	4.72	0.224	2.916	3.702420082	5.67E-05	0.000839111	--	-	-	-	-	-	-	GO:0003723//RNA binding	-	--
Unigene0003538	13	12	11	14	23	380	244	113	225	238	0.66	0.53	0.5	0.5	0.91	12.48	6.14	4.82	8.53	8.33	0.62	8.06	3.700439718	1.45E-20	2.39E-18	--	-	-	-	-	-	-	-	GO:0032007//negative regulation of TOR signaling;GO:0034198//cellular response to amino acid starvation	--
Unigene0036856	0	7	4	2	1	65	86	16	65	9	0	0.43	0.25	0.1	0.06	2.99	3.03	0.96	3.45	0.44	0.168	2.174	3.693818802	9.46E-06	0.00017291	RDX	XP_045122038.1 moesin/ezrin/radixin homolog 1-like [Portunus trituberculatus]	-	-	-	-	GO:0000785//chromatin;GO:0005575//cellular_component;GO:0005622//intracellular anatomical structure;GO:0005634//nucleus;GO:0005694//chromosome;GO:0005700//polytene chromosome;GO:0005703//polytene chromosome puff;GO:0005737//cytoplasm;GO:0005819//spindle;GO:0005829//cytosol;GO:0005856//cytoskeleton;GO:0005886//plasma membrane;GO:0005911//cell-cell junction;GO:0005912//adherens junction;GO:0005938/…	GO:0003674//molecular_function;GO:0003779//actin binding;GO:0005198//structural molecule activity;GO:0005488//binding;GO:0005515//protein binding;GO:0005524//ATP binding;GO:0005543//phospholipid binding;GO:0005546//phosphatidylinositol-4,5-bisphosphate binding;GO:0008017//microtubule binding;GO:0008092//cytoskeletal protein binding;GO:0008289//lipid binding;GO:0015631//tubulin binding;GO:0035091/…	GO:0000003//reproduction;GO:0000226//microtubule cytoskeleton organization;GO:0000578//embryonic axis specification;GO:0000902//cell morphogenesis;GO:0000904//cell morphogenesis involved in differentiation;GO:0001654//eye development;GO:0001745//compound eye morphogenesis;GO:0001751//compound eye photoreceptor cell differentiation;GO:0001754//eye photoreceptor cell differentiation;GO:0002009//mor…	--
Unigene0005631	7	2	0	6	12	64	83	82	54	137	0.48	0.12	0	0.29	0.64	2.86	2.84	4.77	2.79	6.53	0.306	3.958	3.693168054	1.37E-09	5.23E-08	--	XP_028129024.1 uncharacterized protein LOC114325225 [Diabrotica virgifera virgifera]	-	-	-	-	-	-	-	--
Unigene0037778	93	55	67	92	66	1474	1443	1326	831	990	4.02	2.08	2.6	2.81	2.23	41.46	31.08	48.46	26.98	29.66	2.748	35.528	3.692502567	2.65E-39	1.65E-36	--	-	-	-	-	-	-	-	-	--
Unigene0026135	2	0	3	14	0	29	28	30	69	114	0.18	0	0.24	0.89	0	1.69	1.25	2.27	4.64	7.07	0.262	3.384	3.691090852	1.50E-05	0.000262232	--	-	-	-	-	-	-	-	-	--
Unigene0039225	11	12	16	14	5	761	45	83	15	63	0.66	0.64	0.87	0.6	0.24	29.92	1.36	4.24	0.68	2.64	0.602	7.768	3.689707809	0.000585357	0.006411377	Qpct	XP_045109766.1 glutaminyl-peptide cyclotransferase-like isoform X1 [Portunus trituberculatus]	-	-	-	-	GO:0005575//cellular_component;GO:0005622//intracellular anatomical structure;GO:0005737//cytoplasm;GO:0005783//endoplasmic reticulum;GO:0012505//endomembrane system;GO:0043226//organelle;GO:0043227//membrane-bounded organelle;GO:0043229//intracellular organelle;GO:0043231//intracellular membrane-bounded organelle	GO:0003674//molecular_function;GO:0003824//catalytic activity;GO:0016740//transferase activity;GO:0016746//acyltransferase activity	GO:0008150//biological_process	--
Unigene0030781	2	0	3	0	4	36	10	65	18	7	0.13	0	0.17	0	0.2	1.48	0.32	3.48	0.86	0.31	0.1	1.29	3.689299161	0.000361394	0.004238042	--	XP_045111748.1 uncharacterized protein LOC123504907 [Portunus trituberculatus]	-	-	-	-	-	-	GO:0015074//DNA integration	--
Unigene0036310	3	4	3	5	2	220	12	23	2	19	0.41	0.48	0.37	0.49	0.21	19.72	0.82	2.68	0.21	1.81	0.392	5.048	3.686786351	0.000307899	0.003685413	--	-	-	-	-	-	-	-	-	--
Unigene0045178	1	0	0	0	1	7	5	3	9	9	0.15	0	0	0	0.12	0.7	0.38	0.39	1.04	0.96	0.054	0.694	3.68390435	0.006089203	0.045890921	--	-	-	-	-	-	-	-	-	--
Unigene0040064	1	1	0	1	0	24	9	5	5	7	0.16	0.14	0	0.11	0	2.49	0.72	0.68	0.6	0.77	0.082	1.052	3.681366985	0.002872216	0.024556505	--	-	-	-	-	-	GO:0030176//integral component of endoplasmic reticulum membrane	GO:0030234//enzyme regulator activity	GO:0006874//cellular calcium ion homeostasis	--
Unigene0003215	12	53	3	19	7	410	176	118	524	253	1.06	4.11	0.24	1.19	0.48	23.61	7.76	8.83	34.84	15.52	1.416	18.112	3.677052693	2.40E-08	7.41E-07	--	XP_045104038.1 uncharacterized protein LOC123499702 [Portunus trituberculatus]	-	-	-	-	-	GO:0005509//calcium ion binding	-	--
Unigene0040239	0	1	0	15	0	11	60	12	83	54	0	0.23	0	2.73	0	1.84	7.69	2.61	16.04	9.63	0.592	7.562	3.675098768	0.000569489	0.006272213	--	-	-	-	-	-	-	-	-	--
Unigene0009315	12	9	7	0	11	218	220	120	61	65	5.45	3.58	2.85	0	3.9	64.4	49.78	46.06	20.8	20.45	3.156	40.298	3.674539129	4.28E-09	1.50E-07	--	-	-	-	-	-	-	-	-	--
Unigene0039337	9	8	14	20	11	223	265	202	77	215	1.81	1.41	2.53	2.85	1.73	29.22	26.59	34.39	11.64	30.01	2.066	26.37	3.673985412	3.48E-20	5.56E-18	--	-	-	-	-	-	-	-	-	--
Unigene0000183	1	29	5	46	52	807	591	64	217	404	0.05	1.33	0.23	1.7	2.12	27.42	15.38	2.83	8.51	14.62	1.086	13.752	3.662545442	0.000238328	0.002951922	--	XP_045126093.1 uncharacterized protein LOC123513184 isoform X1 [Portunus trituberculatus]	-	-	-	-	-	GO:0003949//1-(5-phosphoribosyl)-5-[(5-phosphoribosylamino)methylideneamino]imidazole-4-carboxamide isomerase activity	GO:0000105//histidine biosynthetic process	--
Unigene0021944	1	0	0	1	1	23	8	7	4	5	0.15	0	0	0.11	0.12	2.29	0.61	0.91	0.46	0.53	0.076	0.96	3.658963082	0.004149128	0.033278247	--	-	-	-	-	-	-	-	-	--
Unigene0010210	162	270	125	174	179	5884	316	5550	697	781	33.65	49.14	23.31	25.56	29.01	795.3	32.71	974.79	108.74	112.45	32.134	404.798	3.65502968	0.00010866	0.001484468	--	ABG82027.1 anti-lipopolysaccharide factor [Eriocheir sinensis]	-	-	-	-	-	-	-	--
Unigene0002006	1	2	1	1	0	12	12	14	20	20	0.08	0.15	0.07	0.06	0	0.65	0.5	0.98	1.25	1.15	0.072	0.906	3.653442239	9.42E-05	0.001309747	--	-	-	-	-	-	-	-	-	--
Unigene0019232	50	38	63	65	63	1433	913	727	591	728	5.19	3.46	5.88	4.77	5.11	96.84	47.26	63.84	46.1	52.41	4.882	61.29	3.650107505	1.11E-31	4.21E-29	Hspbp1	XP_045133572.1 hsp70-binding protein 1-like [Portunus trituberculatus]	Genetic Information Processing	Folding, sorting and degradation	ko04141//Protein processing in endoplasmic reticulum	K09562	GO:0005575//cellular_component	GO:0003674//molecular_function;GO:0004857//enzyme inhibitor activity;GO:0005488//binding;GO:0005515//protein binding;GO:0019899//enzyme binding;GO:0030234//enzyme regulator activity;GO:0031625//ubiquitin protein ligase binding;GO:0044389//ubiquitin-like protein ligase binding;GO:0098772//molecular function regulator	GO:0006457//protein folding;GO:0008150//biological_process;GO:0009893//positive regulation of metabolic process;GO:0009894//regulation of catabolic process;GO:0009896//positive regulation of catabolic process;GO:0009987//cellular process;GO:0010604//positive regulation of macromolecule metabolic process;GO:0019222//regulation of metabolic process;GO:0030162//regulation of proteolysis;GO:0031323//…	--
Unigene0002665	1008	1100	580	852	507	22951	7396	15366	10454	5946	112.11	107.2	57.92	67.01	44	1661	409.96	1445.06	873.31	458.42	77.648	969.55	3.64229463	7.56E-16	7.35E-14	--	-	-	-	-	-	-	-	-	--
Unigene0024026	270	336	269	335	274	5374	7522	2848	4266	4004	20.34	22.18	18.2	17.85	16.11	263.48	282.46	181.45	241.43	209.13	18.936	235.59	3.637074787	1.06E-73	2.93E-70	FKBP4	XP_045117683.1 peptidyl-prolyl cis-trans isomerase FKBP4-like isoform X1 [Portunus trituberculatus]	-	-	-	-	GO:0005575//cellular_component;GO:0005622//intracellular anatomical structure;GO:0005737//cytoplasm;GO:0005886//plasma membrane;GO:0016020//membrane;GO:0016027//inaD signaling complex;GO:0016028//rhabdomere;GO:0019897//extrinsic component of plasma membrane;GO:0019898//extrinsic component of membrane;GO:0032991//protein-containing complex;GO:0042995//cell projection;GO:0071944//cell periphery;GO:…	GO:0003674//molecular_function;GO:0003755//peptidyl-prolyl cis-trans isomerase activity;GO:0003824//catalytic activity;GO:0005488//binding;GO:0005515//protein binding;GO:0005527//macrolide binding;GO:0005528//FK506 binding;GO:0016853//isomerase activity;GO:0016859//cis-trans isomerase activity;GO:0031072//heat shock protein binding;GO:0051879//Hsp90 protein binding;GO:0097159//organic cyclic comp…	GO:0000413//protein peptidyl-prolyl isomerization;GO:0003008//system process;GO:0006457//protein folding;GO:0006464//cellular protein modification process;GO:0006807//nitrogen compound metabolic process;GO:0007275//multicellular organism development;GO:0007399//nervous system development;GO:0007422//peripheral nervous system development;GO:0007600//sensory perception;GO:0007601//visual perception…	--
Unigene0013595	2	7	2	3	5	22	200	13	71	28	0.28	0.85	0.25	0.3	0.54	1.99	13.88	1.53	7.42	2.7	0.444	5.504	3.631848888	3.99E-06	7.99E-05	--	-	-	-	-	-	-	-	-	--
Unigene0000597	0	1	2	0	0	8	31	5	8	4	0	0.11	0.22	0	0	0.63	1.88	0.51	0.73	0.34	0.066	0.818	3.631562914	0.003542291	0.029275912	--	-	-	-	-	-	GO:0019031//viral envelope	-	-	--
Unigene0024409	3	1	3	11	13	28	430	18	49	22	0.2	0.06	0.18	0.53	0.69	1.24	14.59	1.04	2.51	1.04	0.332	4.084	3.62072772	8.06E-05	0.001148515	--	-	-	-	-	-	-	-	-	--
Unigene0010211	22	31	13	24	42	1279	41	427	90	112	2.48	3.06	1.32	1.91	3.69	93.79	2.3	40.69	7.62	8.75	2.492	30.63	3.619569393	0.000385358	0.004487473	--	ACY25186.1 anti-lipopolysaccharide factor 2 [Eriocheir sinensis]	-	-	-	-	-	-	-	--
Unigene0012495	1	0	0	2	0	6	11	10	14	2	0.14	0	0	0.19	0	0.53	0.75	1.15	1.43	0.19	0.066	0.81	3.617383978	0.005883948	0.044667387	--	-	-	-	-	-	-	-	-	--
Unigene0042581	9	1	3	2	4	111	60	28	61	54	0.48	0.05	0.14	0.08	0.17	3.87	1.6	1.27	2.46	2.01	0.184	2.242	3.607008607	9.22E-09	3.06E-07	--	KAG0721213.1 PiggyBac transposable element-derived protein 4 [Chionoecetes opilio]	-	-	-	-	-	GO:0003677//DNA binding;GO:0004803//transposase activity;GO:0016788//hydrolase activity, acting on ester bonds	GO:0006313//transposition, DNA-mediated	--
Unigene0025304	1	0	1	1	2	6	13	3	45	6	0.06	0	0.05	0.04	0.09	0.22	0.37	0.15	1.93	0.24	0.048	0.582	3.599912842	0.002361873	0.020914428	--	-	-	-	-	-	-	-	-	--
Unigene0029019	1	4	0	2	3	15	17	38	34	35	0.72	2.52	0	1.02	1.68	7.01	6.09	23.08	18.34	17.43	1.188	14.39	3.598459851	8.48E-06	0.000156881	--	-	-	-	-	-	GO:0016020//membrane	GO:0019955//cytokine binding	-	--
Unigene0030993	0	0	1	1	1	14	20	3	5	4	0	0	0.1	0.08	0.09	1.05	1.15	0.29	0.43	0.32	0.054	0.648	3.584962501	0.006025698	0.045492473	--	-	-	-	-	-	-	-	-	--
Unigene0030368	0	1	3	3	3	50	48	24	10	17	0	0.16	0.5	0.4	0.44	6.07	4.46	3.79	1.4	2.2	0.3	3.584	3.578536232	7.40E-06	0.00013834	--	-	-	-	-	-	-	-	-	--
Unigene0030895	21	9	4	7	16	441	140	161	41	100	1.03	0.39	0.18	0.24	0.61	14.12	3.43	6.7	1.52	3.41	0.49	5.836	3.574126229	1.13E-07	3.08E-06	--	XP_045138346.1 uncharacterized protein LOC123520269 [Portunus trituberculatus]	-	-	-	-	-	-	-	--
Unigene0026360	12	4	3	1	5	15	32	24	41	281	0.69	0.2	0.16	0.04	0.23	0.56	0.92	1.17	1.78	11.23	0.264	3.132	3.568474378	0.000126336	0.001695902	--	-	-	-	-	-	-	-	-	--
Unigene0004033	4	13	14	29	9	209	168	146	254	174	0.28	0.78	0.87	1.41	0.48	9.37	5.77	8.5	13.14	8.31	0.764	9.018	3.561162967	1.09E-17	1.33E-15	--	-	-	-	-	-	-	-	-	--
Unigene0042386	2	1	3	2	3	8	20	17	11	108	0.11	0.05	0.15	0.08	0.13	0.28	0.54	0.78	0.45	4.08	0.104	1.226	3.559303546	0.000155887	0.00204385	--	-	-	-	-	-	-	-	-	--
Unigene0034839	193	249	251	214	180	3109	4302	3115	2932	2737	14.96	16.91	17.46	11.73	10.88	156.77	166.14	204.1	170.65	147.02	14.388	168.936	3.553538827	2.48E-59	3.97E-56	SelD	XP_045137077.1 inactive selenide, water dikinase-like protein [Portunus trituberculatus]	Metabolism;Metabolism	Global and overview maps;Metabolism of other amino acids	ko01100//Metabolic pathways;ko00450//Selenocompound metabolism	K01008;K01008	GO:0005575//cellular_component;GO:0005622//intracellular anatomical structure;GO:0005634//nucleus;GO:0005635//nuclear envelope;GO:0005886//plasma membrane;GO:0012505//endomembrane system;GO:0016020//membrane;GO:0031090//organelle membrane;GO:0031965//nuclear membrane;GO:0031967//organelle envelope;GO:0031975//envelope;GO:0043226//organelle;GO:0043227//membrane-bounded organelle;GO:0043229//intrac…	GO:0000166//nucleotide binding;GO:0003674//molecular_function;GO:0003824//catalytic activity;GO:0004756//selenide, water dikinase activity;GO:0005488//binding;GO:0005515//protein binding;GO:0005524//ATP binding;GO:0009030//thiamine-phosphate kinase activity;GO:0016301//kinase activity;GO:0016491//oxidoreductase activity;GO:0016740//transferase activity;GO:0016772//transferase activity, transferri…	GO:0001887//selenium compound metabolic process;GO:0006082//organic acid metabolic process;GO:0006520//cellular amino acid metabolic process;GO:0006541//glutamine metabolic process;GO:0006793//phosphorus metabolic process;GO:0006796//phosphate-containing compound metabolic process;GO:0006807//nitrogen compound metabolic process;GO:0006996//organelle organization;GO:0007005//mitochondrion organiza…	--
Unigene0004237	1	2	1	7	1	61	56	13	22	23	0.19	0.33	0.17	0.93	0.15	7.42	5.22	2.06	3.09	2.98	0.354	4.154	3.552679951	2.36E-06	4.96E-05	--	-	-	-	-	-	-	-	-	--
Unigene0019971	3	2	0	1	0	26	10	19	27	8	0.31	0.18	0	0.07	0	1.74	0.51	1.66	2.09	0.57	0.112	1.314	3.552394638	0.000220724	0.002757663	--	XP_045126073.1 FYVE and coiled-coil domain-containing protein 1-like isoform X3 [Portunus trituberculatus]	-	-	-	-	-	GO:0046872//metal ion binding	-	--
Unigene0010189	1	3	1	2	0	22	11	37	16	10	0.09	0.24	0.08	0.13	0	1.29	0.49	2.82	1.08	0.62	0.108	1.26	3.544320516	0.000134208	0.001790611	--	XP_045131970.1 serine-rich adhesin for platelets-like isoform X2 [Portunus trituberculatus]	-	-	-	-	-	GO:0004114//3',5'-cyclic-nucleotide phosphodiesterase activity;GO:0005212//structural constituent of eye lens	GO:0007165//signal transduction	--
Unigene0004624	0	1	1	2	1	22	4	24	4	9	0	0.07	0.07	0.11	0.06	1.12	0.16	1.59	0.24	0.49	0.062	0.72	3.537656786	0.002154146	0.019346445	--	-	-	-	-	-	-	-	GO:0006270//DNA replication initiation	--
Unigene0005275	16	13	6	6	27	321	276	205	127	85	1.76	1.25	0.59	0.47	2.31	22.91	15.09	19.02	10.46	6.46	1.276	14.788	3.534726714	1.37E-10	6.12E-09	--	-	-	-	-	-	GO:0005618//cell wall	-	-	--
Unigene0043074	0	3	2	0	2	17	30	11	12	36	0	0.55	0.38	0	0.33	2.33	3.15	1.96	1.9	5.26	0.252	2.92	3.53447273	4.56E-05	0.000692544	--	-	-	-	-	-	-	-	-	--
Unigene0009314	35	34	38	42	39	691	554	474	536	444	8.88	7.56	8.66	7.54	7.72	114.08	70.05	101.69	102.14	78.09	8.072	93.21	3.529486663	4.77E-40	3.40E-37	--	-	-	-	-	-	-	GO:0005515//protein binding	-	--
Unigene0028426	135	159	159	121	109	2252	1810	3029	1008	1524	4.76	4.91	5.03	3.01	3	51.64	31.79	90.25	26.68	37.22	4.142	47.516	3.520013933	4.22E-20	6.71E-18	--	XP_045131482.1 SET and MYND domain-containing protein DDB_G0292140-like isoform X1 [Portunus trituberculatus]	Metabolism;Metabolism	Global and overview maps;Amino acid metabolism	ko01100//Metabolic pathways;ko00310//Lysine degradation	K11426;K11426	GO:0005575//cellular_component	GO:0003674//molecular_function;GO:0005488//binding;GO:0005515//protein binding;GO:0008270//zinc ion binding;GO:0043167//ion binding;GO:0043169//cation binding;GO:0046872//metal ion binding;GO:0046914//transition metal ion binding	-	--
Unigene0039860	3	1	0	0	1	15	28	12	11	16	0.34	0.1	0	0	0.09	1.11	1.58	1.15	0.94	1.26	0.106	1.208	3.510484285	0.000108471	0.001482361	--	-	-	-	-	-	-	-	-	--
Unigene0022266	0	0	2	3	0	19	24	10	11	5	0	0	0.5	0.59	0	3.44	3.33	2.35	2.3	0.96	0.218	2.476	3.505611274	0.000967476	0.009814722	--	-	-	-	-	-	-	-	-	--
Unigene0015927	0	1	0	3	1	5	15	14	23	5	0	0.19	0	0.46	0.17	0.7	1.6	2.54	3.71	0.74	0.164	1.858	3.501982782	0.001942955	0.017709377	--	-	-	-	-	-	-	-	-	--
Unigene0015477	1	0	1	1	1	29	3	7	11	5	0.17	0	0.15	0.12	0.13	3.2	0.25	1.01	1.4	0.59	0.114	1.29	3.500265336	0.00362558	0.029850907	--	-	-	-	-	-	-	GO:0043565//sequence-specific DNA binding	-	--
Unigene0001958	59	55	62	59	45	846	1116	422	692	1014	4.69	3.83	4.42	3.31	2.79	43.74	44.19	28.35	41.3	55.85	3.808	42.686	3.486657594	3.60E-44	3.75E-41	MTHFD2	XP_045125005.1 bifunctional methylenetetrahydrofolate dehydrogenase/cyclohydrolase, mitochondrial-like [Portunus trituberculatus]	Metabolism;Metabolism	Global and overview maps;Metabolism of cofactors and vitamins	ko01100//Metabolic pathways;ko00670//One carbon pool by folate	K13403;K13403	GO:0005575//cellular_component;GO:0005622//intracellular anatomical structure;GO:0005737//cytoplasm;GO:0005739//mitochondrion;GO:0043226//organelle;GO:0043227//membrane-bounded organelle;GO:0043229//intracellular organelle;GO:0043231//intracellular membrane-bounded organelle	GO:0000287//magnesium ion binding;GO:0003674//molecular_function;GO:0003824//catalytic activity;GO:0004477//methenyltetrahydrofolate cyclohydrolase activity;GO:0004487//methylenetetrahydrofolate dehydrogenase (NAD+) activity;GO:0004488//methylenetetrahydrofolate dehydrogenase (NADP+) activity;GO:0005488//binding;GO:0016491//oxidoreductase activity;GO:0016616//oxidoreductase activity, acting on th…	GO:0005975//carbohydrate metabolic process;GO:0006082//organic acid metabolic process;GO:0006575//cellular modified amino acid metabolic process;GO:0006725//cellular aromatic compound metabolic process;GO:0006730//one-carbon metabolic process;GO:0006760//folic acid-containing compound metabolic process;GO:0006807//nitrogen compound metabolic process;GO:0008150//biological_process;GO:0008152//meta…	--
Unigene0035932	2	0	0	0	1	7	12	11	3	13	0.56	0	0	0	0.22	1.28	1.68	2.61	0.63	2.53	0.156	1.746	3.484435625	0.004402112	0.035033541	--	-	-	-	-	-	-	-	-	--
Unigene0012234	1227	1393	501	1406	763	30191	8434	16106	8428	8971	51.12	50.85	18.74	41.42	24.8	818.5	175.12	567.4	263.74	259.09	37.386	416.77	3.478681405	7.29E-14	5.42E-12	MELTF	XP_045105901.1 LOW QUALITY PROTEIN: transferrin-like [Portunus trituberculatus]	-	-	-	-	GO:0005575//cellular_component;GO:0005576//extracellular region;GO:0005615//extracellular space;GO:0030288//outer membrane-bounded periplasmic space;GO:0031362//anchored component of external side of plasma membrane;GO:0055052//ATP-binding cassette (ABC) transporter complex, substrate-binding subunit-containing	GO:0043168//anion binding;GO:0043225//ATPase-coupled inorganic anion transmembrane transporter activity	GO:0007610//behavior;GO:0007635//chemosensory behavior;GO:0008150//biological_process;GO:0009605//response to external stimulus;GO:0009607//response to biotic stimulus;GO:0009620//response to fungus;GO:0042048//olfactory behavior;GO:0042221//response to chemical;GO:0043207//response to external biotic stimulus;GO:0050896//response to stimulus;GO:0051704//multi-organism process;GO:0051707//respons…	--
Unigene0043151	2	2	0	1	0	3	58	1	18	6	0.49	0.43	0	0.17	0	0.48	7.11	0.21	3.33	1.02	0.218	2.43	3.478556274	0.005890666	0.04471024	--	-	-	-	-	-	GO:0009277//fungal-type cell wall	GO:0005506//iron ion binding;GO:0016702//oxidoreductase activity, acting on single donors with incorporation of molecular oxygen, incorporation of two atoms of oxygen	GO:0015891//siderophore transport	--
Unigene0025069	6	13	9	20	7	259	186	96	61	161	0.45	0.86	0.61	1.06	0.41	12.66	6.96	6.1	3.44	8.38	0.678	7.508	3.469071472	2.69E-14	2.13E-12	Cant1	XP_045125009.1 soluble calcium-activated nucleotidase 1-like [Portunus trituberculatus]	Metabolism;Metabolism;Metabolism	Global and overview maps;Nucleotide metabolism;Nucleotide metabolism	ko01100//Metabolic pathways;ko00230//Purine metabolism;ko00240//Pyrimidine metabolism	K12304;K12304;K12304	GO:0000139//Golgi membrane;GO:0005575//cellular_component;GO:0005576//extracellular region;GO:0005622//intracellular anatomical structure;GO:0005737//cytoplasm;GO:0005783//endoplasmic reticulum;GO:0005789//endoplasmic reticulum membrane;GO:0005794//Golgi apparatus;GO:0005795//Golgi stack;GO:0005886//plasma membrane;GO:0012505//endomembrane system;GO:0016020//membrane;GO:0016021//integral componen…	GO:0003674//molecular_function;GO:0003824//catalytic activity;GO:0004382//guanosine-diphosphatase activity;GO:0005488//binding;GO:0005509//calcium ion binding;GO:0005515//protein binding;GO:0016462//pyrophosphatase activity;GO:0016787//hydrolase activity;GO:0016817//hydrolase activity, acting on acid anhydrides;GO:0016818//hydrolase activity, acting on acid anhydrides, in phosphorus-containing an…	GO:0000003//reproduction;GO:0001775//cell activation;GO:0002252//immune effector process;GO:0002263//cell activation involved in immune response;GO:0002274//myeloid leukocyte activation;GO:0002275//myeloid cell activation involved in immune response;GO:0002283//neutrophil activation involved in immune response;GO:0002366//leukocyte activation involved in immune response;GO:0002376//immune system …	--
Unigene0012622	20	7	9	18	11	381	137	190	103	84	2.45	0.75	0.99	1.56	1.05	30.38	8.37	19.69	9.48	7.14	1.36	15.012	3.464437639	1.28E-10	5.74E-09	--	-	-	-	-	-	-	-	-	--
Unigene0040564	2	0	0	0	2	16	13	11	7	11	0.44	0	0	0	0.34	2.28	1.42	2.04	1.15	1.67	0.156	1.712	3.456064768	0.001157378	0.011413211	--	KAG0723451.1 hypothetical protein GWK47_042708 [Chionoecetes opilio]	-	-	-	-	GO:0005694//chromosome	GO:0003677//DNA binding;GO:0003824//catalytic activity;GO:0005524//ATP binding	GO:0006259//DNA metabolic process	--
Unigene0008376	8	13	8	7	11	31	62	243	217	29	3.28	4.67	2.95	2.03	3.52	8.27	12.67	84.27	66.85	8.24	3.29	36.06	3.454239908	3.71E-06	7.51E-05	--	-	-	-	-	-	-	-	-	--
Unigene0006225	24	39	57	143	80	1495	472	1521	449	215	2.73	3.89	5.83	11.52	7.11	110.84	26.8	146.54	38.43	16.98	6.216	67.918	3.449735567	4.77E-06	9.39E-05	--	-	-	-	-	-	GO:0016021//integral component of membrane	GO:0004190//aspartic-type endopeptidase activity	GO:0016485//protein processing	--
Unigene0042031	0	1	1	3	1	11	5	36	2	14	0	0.15	0.16	0.37	0.14	1.25	0.43	5.3	0.26	1.69	0.164	1.786	3.444964361	0.003451873	0.028630886	--	-	-	-	-	-	-	-	-	--
Unigene0022303	1	2	0	6	0	47	18	24	13	9	0.13	0.22	0	0.54	0	3.9	1.15	2.59	1.25	0.8	0.178	1.938	3.444619424	0.000263095	0.003221324	ALPL	KAG0711114.1 Alkaline phosphatase, tissue-nonspecific isozyme [Chionoecetes opilio]	Metabolism;Metabolism;Metabolism	Global and overview maps;Metabolism of cofactors and vitamins;Metabolism of cofactors and vitamins	ko01100//Metabolic pathways;ko00790//Folate biosynthesis;ko00730//Thiamine metabolism	K01077;K01077;K01077	-	GO:0003824//catalytic activity;GO:0016791//phosphatase activity;GO:0046872//metal ion binding	-	--
Unigene0043633	16	3	1	34	8	109	165	102	240	170	1.5	0.25	0.08	2.26	0.59	6.67	7.73	8.11	16.95	11.08	0.936	10.108	3.432845229	2.38E-08	7.37E-07	--	-	-	-	-	-	-	-	-	--
Unigene0021070	38	28	28	58	27	835	499	441	249	369	2.31	1.49	1.53	2.49	1.28	32.97	15.09	22.63	11.35	15.52	1.82	19.512	3.422351308	1.36E-20	2.25E-18	--	-	-	-	-	-	-	-	-	--
Unigene0038246	1	1	3	1	0	7	25	4	11	41	0.08	0.07	0.21	0.05	0	0.35	0.96	0.26	0.64	2.18	0.082	0.878	3.420525125	0.000875493	0.009004526	--	XP_045117775.1 uncharacterized protein LOC123508264, partial [Portunus trituberculatus]	-	-	-	-	-	-	-	--
Unigene0008520	6	10	3	6	11	147	105	81	63	82	0.43	0.63	0.19	0.3	0.62	6.87	3.76	4.92	3.4	4.08	0.434	4.606	3.407747463	1.98E-13	1.39E-11	--	XP_045125292.1 uncharacterized protein LOC123512780 isoform X1 [Portunus trituberculatus]	-	-	-	-	-	-	-	--
Unigene0038177	659	119	164	150	181	6313	1192	1899	4307	3951	54.3	8.59	12.13	8.74	11.64	338.49	48.95	132.31	266.56	225.68	19.08	202.398	3.407061958	1.42E-05	0.000248823	--	XP_045128252.1 uncharacterized protein LOC123514401 [Portunus trituberculatus]	-	-	-	-	-	-	-	--
Unigene0024469	1	2	0	10	1	36	37	22	34	38	0.37	0.64	0	2.6	0.29	8.61	6.77	6.83	9.38	9.68	0.78	8.254	3.403547409	1.71E-06	3.71E-05	--	-	-	-	-	-	-	-	-	--
Unigene0040220	6	2	0	2	2	55	62	10	10	44	0.49	0.14	0	0.11	0.13	2.91	2.51	0.69	0.61	2.48	0.174	1.84	3.402546555	3.12E-05	0.000496086	--	-	-	-	-	-	-	GO:0008853//exodeoxyribonuclease III activity	GO:0006281//DNA repair	--
Unigene0001973	5	16	1	24	18	136	189	138	158	170	0.3	0.84	0.05	1.02	0.84	5.32	5.67	7.02	7.14	7.09	0.61	6.448	3.401970596	2.65E-13	1.83E-11	Cars1	XP_045120269.1 cysteine--tRNA ligase, cytoplasmic-like [Portunus trituberculatus]	Genetic Information Processing	Translation	ko00970//Aminoacyl-tRNA biosynthesis	K01883	GO:0005575//cellular_component;GO:0005622//intracellular anatomical structure;GO:0005737//cytoplasm;GO:0005829//cytosol	GO:0000049//tRNA binding;GO:0000166//nucleotide binding;GO:0003674//molecular_function;GO:0003676//nucleic acid binding;GO:0003723//RNA binding;GO:0003824//catalytic activity;GO:0004812//aminoacyl-tRNA ligase activity;GO:0004817//cysteine-tRNA ligase activity;GO:0004822//isoleucine-tRNA ligase activity;GO:0004823//leucine-tRNA ligase activity;GO:0004825//methionine-tRNA ligase activity;GO:0005488…	GO:0002181//cytoplasmic translation;GO:0006082//organic acid metabolic process;GO:0006139//nucleobase-containing compound metabolic process;GO:0006399//tRNA metabolic process;GO:0006412//translation;GO:0006418//tRNA aminoacylation for protein translation;GO:0006423//cysteinyl-tRNA aminoacylation;GO:0006428//isoleucyl-tRNA aminoacylation;GO:0006429//leucyl-tRNA aminoacylation;GO:0006431//methionyl…	--
Unigene0017701	0	2	1	0	2	12	26	16	7	7	0	0.42	0.22	0	0.37	1.88	3.11	3.25	1.26	1.17	0.202	2.134	3.401132978	0.00094189	0.009599584	--	-	-	-	-	-	-	-	-	--
Unigene0010230	0	3	1	7	0	25	39	28	9	34	0	0.52	0.18	0.97	0	3.19	3.81	4.64	1.33	4.62	0.334	3.518	3.396835475	3.81E-05	0.00059161	--	-	-	-	-	-	-	-	-	--
Unigene0036837	0	1	0	2	1	9	17	4	5	16	0	0.16	0	0.26	0.14	1.06	1.53	0.61	0.68	2	0.112	1.176	3.392317423	0.003463894	0.028707725	--	-	-	-	-	-	-	-	-	--
Unigene0035484	0	1	0	5	1	26	12	8	14	21	0	0.13	0	0.53	0.12	2.53	0.89	1.01	1.57	2.17	0.156	1.634	3.388790049	0.000506334	0.00567263	Pdxdc1	XP_045106940.1 LOW QUALITY PROTEIN: pyridoxal-dependent decarboxylase domain-containing protein 1-like [Portunus trituberculatus]	-	-	-	-	GO:0005575//cellular_component;GO:0005622//intracellular anatomical structure;GO:0005737//cytoplasm;GO:0005794//Golgi apparatus;GO:0012505//endomembrane system;GO:0043226//organelle;GO:0043227//membrane-bounded organelle;GO:0043229//intracellular organelle;GO:0043231//intracellular membrane-bounded organelle	GO:0003674//molecular_function;GO:0003824//catalytic activity;GO:0004837//tyrosine decarboxylase activity;GO:0005488//binding;GO:0005515//protein binding;GO:0016829//lyase activity;GO:0016830//carbon-carbon lyase activity;GO:0016831//carboxy-lyase activity;GO:0019842//vitamin binding;GO:0030170//pyridoxal phosphate binding;GO:0036094//small molecule binding;GO:0043167//ion binding;GO:0043168//ani…	GO:0006082//organic acid metabolic process;GO:0008150//biological_process;GO:0008152//metabolic process;GO:0009987//cellular process;GO:0019752//carboxylic acid metabolic process;GO:0043436//oxoacid metabolic process;GO:0044237//cellular metabolic process;GO:0044281//small molecule metabolic process;GO:0071704//organic substance metabolic process	--
Unigene0007593	12	10	14	22	14	209	252	159	152	158	1.17	0.85	1.22	1.51	1.06	13.24	12.23	13.09	11.11	10.66	1.162	12.066	3.376265514	1.59E-29	5.33E-27	Psph	XP_042213996.1 phosphoserine phosphatase-like [Homarus americanus]	Metabolism;Metabolism;Metabolism;Metabolism	Global and overview maps;Global and overview maps;Global and overview maps;Amino acid metabolism	ko01100//Metabolic pathways;ko01200//Carbon metabolism;ko01230//Biosynthesis of amino acids;ko00260//Glycine, serine and threonine metabolism	K01079;K01079;K01079;K01079	GO:0005575//cellular_component;GO:0005622//intracellular anatomical structure;GO:0005737//cytoplasm;GO:0005829//cytosol;GO:0009507//chloroplast;GO:0009536//plastid;GO:0042995//cell projection;GO:0043005//neuron projection;GO:0043226//organelle;GO:0043227//membrane-bounded organelle;GO:0043229//intracellular organelle;GO:0043231//intracellular membrane-bounded organelle;GO:0120025//plasma membrane…	GO:0000287//magnesium ion binding;GO:0003674//molecular_function;GO:0003824//catalytic activity;GO:0005488//binding;GO:0005509//calcium ion binding;GO:0005515//protein binding;GO:0016787//hydrolase activity;GO:0016788//hydrolase activity, acting on ester bonds;GO:0016791//phosphatase activity;GO:0042578//phosphoric ester hydrolase activity;GO:0042625//ATPase-coupled ion transmembrane transporter …	GO:0000003//reproduction;GO:0000902//cell morphogenesis;GO:0000904//cell morphogenesis involved in differentiation;GO:0003006//developmental process involved in reproduction;GO:0006082//organic acid metabolic process;GO:0006520//cellular amino acid metabolic process;GO:0006545//glycine biosynthetic process;GO:0006563//L-serine metabolic process;GO:0006564//L-serine biosynthetic process;GO:0006793…	--
Unigene0000120	0	4	2	0	0	24	15	8	12	23	0	0.37	0.19	0	0	1.64	0.79	0.71	0.95	1.68	0.112	1.154	3.365072587	0.000491977	0.005526646	--	-	-	-	-	-	GO:0016020//membrane	GO:0042030//ATPase inhibitor activity	GO:1901894//regulation of ATPase-coupled calcium transmembrane transporter activity	--
Unigene0039358	3	1	10	6	1	28	42	83	30	73	0.14	0.04	0.43	0.2	0.04	0.87	1	3.35	1.08	2.42	0.17	1.744	3.358793389	2.17E-06	4.59E-05	--	-	-	-	-	-	-	-	GO:0006464//cellular protein modification process;GO:0015031//protein transport	--
Unigene0005217	21	28	14	30	6	303	284	370	119	160	1.84	2.15	1.1	1.85	0.41	17.24	12.38	27.36	7.82	9.7	1.47	14.9	3.341424271	2.25E-12	1.36E-10	--	-	-	-	-	-	-	-	-	--
Unigene0043571	32	38	47	59	38	1003	1082	57	382	410	3.61	3.76	4.77	4.71	3.35	73.72	60.91	5.44	32.41	32.1	4.04	40.916	3.340237914	8.47E-10	3.32E-08	prkrip1	XP_045614812.1 PRKR-interacting protein 1 homolog [Procambarus clarkii]	-	-	-	-	GO:0005575//cellular_component;GO:0005622//intracellular anatomical structure;GO:0005634//nucleus;GO:0005730//nucleolus;GO:0031974//membrane-enclosed lumen;GO:0031981//nuclear lumen;GO:0043226//organelle;GO:0043227//membrane-bounded organelle;GO:0043228//non-membrane-bounded organelle;GO:0043229//intracellular organelle;GO:0043231//intracellular membrane-bounded organelle;GO:0043232//intracellula…	GO:0003674//molecular_function;GO:0003676//nucleic acid binding;GO:0003723//RNA binding;GO:0003725//double-stranded RNA binding;GO:0004857//enzyme inhibitor activity;GO:0004860//protein kinase inhibitor activity;GO:0005488//binding;GO:0005515//protein binding;GO:0019207//kinase regulator activity;GO:0019210//kinase inhibitor activity;GO:0019887//protein kinase regulator activity;GO:0019899//enzym…	GO:0001932//regulation of protein phosphorylation;GO:0001933//negative regulation of protein phosphorylation;GO:0003008//system process;GO:0003014//renal system process;GO:0006469//negative regulation of protein kinase activity;GO:0008150//biological_process;GO:0009892//negative regulation of metabolic process;GO:0010563//negative regulation of phosphorus metabolic process;GO:0010605//negative re…	--
Unigene0037296	607	617	696	841	763	12817	11916	8278	5953	5886	38.71	34.47	39.85	37.92	37.96	531.81	378.68	446.32	285.11	260.17	37.782	380.418	3.331814533	2.49E-36	1.25E-33	daf-41	AFV74662.1 progesterone-like protein 2, partial [Portunus trituberculatus]	Metabolism;Metabolism	Global and overview maps;Lipid metabolism	ko01100//Metabolic pathways;ko00590//Arachidonic acid metabolism	K15730;K15730	GO:0000781//chromosome, telomeric region;GO:0005575//cellular_component;GO:0005622//intracellular anatomical structure;GO:0005634//nucleus;GO:0005635//nuclear envelope;GO:0005654//nucleoplasm;GO:0005694//chromosome;GO:0005697//telomerase holoenzyme complex;GO:0005737//cytoplasm;GO:0005783//endoplasmic reticulum;GO:0005829//cytosol;GO:0005856//cytoskeleton;GO:0005884//actin filament;GO:0012505//en…	GO:0002039//p53 binding;GO:0003674//molecular_function;GO:0003720//telomerase activity;GO:0003824//catalytic activity;GO:0003964//RNA-directed DNA polymerase activity;GO:0005488//binding;GO:0005515//protein binding;GO:0016740//transferase activity;GO:0016772//transferase activity, transferring phosphorus-containing groups;GO:0016779//nucleotidyltransferase activity;GO:0016853//isomerase activity;…	GO:0000271//polysaccharide biosynthetic process;GO:0000723//telomere maintenance;GO:0001516//prostaglandin biosynthetic process;GO:0001676//long-chain fatty acid metabolic process;GO:0003008//system process;GO:0005975//carbohydrate metabolic process;GO:0005976//polysaccharide metabolic process;GO:0005977//glycogen metabolic process;GO:0005978//glycogen biosynthetic process;GO:0006073//cellular gl…	--
Unigene0028589	0	1	1	3	0	12	24	10	5	10	0	0.18	0.18	0.43	0	1.59	2.44	1.72	0.77	1.41	0.158	1.586	3.327396308	0.001569854	0.014784239	--	-	-	-	-	-	-	-	-	--
Unigene0023406	1	0	0	3	1	19	7	15	12	2	0.32	0	0	0.68	0.25	3.97	1.12	4.07	2.89	0.44	0.25	2.498	3.320773477	0.004898066	0.038222958	--	-	-	-	-	-	-	-	-	--
Unigene0008172	0	4	0	1	1	9	9	18	13	20	0	0.51	0	0.1	0.11	0.85	0.65	2.22	1.42	2.02	0.144	1.432	3.313890776	0.001130914	0.011197311	--	-	-	-	-	-	-	-	-	--
Unigene0001615	0	0	3	4	0	13	10	7	9	40	0	0	0.13	0.14	0	0.42	0.25	0.29	0.34	1.38	0.054	0.536	3.311201688	0.002599253	0.022584331	--	-	-	-	-	-	-	-	-	--
Unigene0041161	15	17	16	12	13	194	200	130	191	207	0.81	0.81	0.78	0.46	0.55	6.85	5.41	5.97	7.79	7.79	0.682	6.762	3.309606372	1.02E-25	2.61E-23	--	XP_045139372.1 THAP domain-containing protein 3-like [Portunus trituberculatus]	-	-	-	-	-	-	-	THAP
Unigene0046175	6	0	0	0	0	37	22	7	20	5	0.7	0	0	0	0	2.81	1.28	0.69	1.75	0.4	0.14	1.386	3.307428525	0.005172197	0.040089823	--	XP_045128206.1 uncharacterized protein LOC123514384 [Portunus trituberculatus]	-	-	-	-	-	-	-	--
Unigene0018512	1	3	0	1	0	27	16	10	2	9	0.1	0.27	0	0.07	0	1.82	0.83	0.88	0.16	0.65	0.088	0.868	3.302119614	0.003511089	0.029052619	--	-	-	-	-	-	-	-	-	--
Unigene0021841	1	2	0	2	2	11	26	1	18	31	0.18	0.31	0	0.25	0.28	1.28	2.32	0.15	2.42	3.84	0.204	2.002	3.294800917	0.001450667	0.013805363	--	-	-	-	-	-	-	-	-	--
Unigene0039906	1	6	1	1	7	4	63	39	80	5	0.43	2.28	0.39	0.31	2.37	1.13	13.61	14.3	26.05	1.5	1.156	11.318	3.29140574	0.001312933	0.012656537	--	-	-	-	-	-	-	-	GO:0010098//suspensor development	--
Unigene0010696	2	1	1	2	2	7	17	16	35	19	0.58	0.25	0.26	0.41	0.45	1.31	2.44	3.9	7.58	3.8	0.39	3.806	3.286729533	0.000166148	0.002160702	--	-	-	-	-	-	-	-	-	--
Unigene0019354	2	4	5	6	6	36	34	71	79	35	0.36	0.62	0.8	0.76	0.83	4.17	3.02	10.69	10.56	4.32	0.674	6.552	3.28111486	1.91E-07	4.96E-06	--	-	-	-	-	-	-	-	-	--
Unigene0019979	1193	1324	1984	1565	1498	19577	21581	19195	14548	16764	175.03	170.21	261.37	162.36	171.48	1868.94	1577.95	2381.19	1603.12	1704.88	188.09	1827.216	3.280152135	1.44E-42	1.33E-39	hsp-16.2	ACY66382.1 heat shock protein family member [Scylla paramamosain]	-	-	-	-	-	-	GO:0006950//response to stress;GO:0008150//biological_process;GO:0010033//response to organic substance;GO:0035966//response to topologically incorrect protein;GO:0042221//response to chemical;GO:0050896//response to stimulus	--
Unigene0012921	9	20	7	15	16	98	189	112	116	288	0.3	0.59	0.21	0.36	0.42	2.15	3.17	3.19	2.94	6.73	0.376	3.636	3.273547633	5.91E-14	4.47E-12	--	XP_045611169.1 DNA repair-scaffolding protein-like [Procambarus clarkii]	-	-	-	-	-	-	-	--
Unigene0040463	2	0	1	3	1	10	39	14	17	8	0.83	0	0.37	0.89	0.33	2.71	8.11	4.94	5.33	2.31	0.484	4.68	3.273429577	0.000305076	0.003652672	--	KAG0711440.1 RRP12-like protein [Chionoecetes opilio]	-	-	-	-	GO:0005575//cellular_component;GO:0005622//intracellular anatomical structure;GO:0005634//nucleus;GO:0005635//nuclear envelope;GO:0005730//nucleolus;GO:0005737//cytoplasm;GO:0005840//ribosome;GO:0012505//endomembrane system;GO:0016020//membrane;GO:0016021//integral component of membrane;GO:0030684//preribosome;GO:0030686//90S preribosome;GO:0031090//organelle membrane;GO:0031224//intrinsic compon…	GO:0003674//molecular_function;GO:0003676//nucleic acid binding;GO:0003723//RNA binding;GO:0003729//mRNA binding;GO:0005488//binding;GO:0097159//organic cyclic compound binding;GO:1901363//heterocyclic compound binding	GO:0000462//maturation of SSU-rRNA from tricistronic rRNA transcript (SSU-rRNA, 5.8S rRNA, LSU-rRNA);GO:0006139//nucleobase-containing compound metabolic process;GO:0006364//rRNA processing;GO:0006396//RNA processing;GO:0006725//cellular aromatic compound metabolic process;GO:0006807//nitrogen compound metabolic process;GO:0008150//biological_process;GO:0008152//metabolic process;GO:0009987//cell…	--
Unigene0006402	23	12	23	34	50	291	252	377	534	136	0.48	0.22	0.43	0.5	0.82	3.97	2.63	6.68	8.41	1.98	0.49	4.734	3.272206052	5.09E-10	2.06E-08	--	XP_045102578.1 separin-like isoform X1 [Portunus trituberculatus]	-	-	-	-	-	-	-	--
Unigene0019758	419	500	485	613	643	9368	9365	5005	4132	4871	24.37	25.48	25.33	25.21	29.18	354.56	271.47	246.15	180.52	196.39	25.914	249.818	3.269073803	1.86E-36	9.68E-34	HSP110	XP_045117572.1 heat shock 70 kDa protein 4-like isoform X2 [Portunus trituberculatus]	-	-	-	-	GO:0005575//cellular_component;GO:0005622//intracellular anatomical structure;GO:0005737//cytoplasm;GO:0005829//cytosol;GO:0005844//polysome;GO:0032991//protein-containing complex;GO:1990904//ribonucleoprotein complex	GO:0000166//nucleotide binding;GO:0000774//adenyl-nucleotide exchange factor activity;GO:0003674//molecular_function;GO:0005488//binding;GO:0005515//protein binding;GO:0005524//ATP binding;GO:0016887//ATP hydrolysis activity;GO:0017076//purine nucleotide binding;GO:0030234//enzyme regulator activity;GO:0030554//adenyl nucleotide binding;GO:0032553//ribonucleotide binding;GO:0032555//purine ribonu…	GO:0006457//protein folding;GO:0006950//response to stress;GO:0007275//multicellular organism development;GO:0007568//aging;GO:0008150//biological_process;GO:0008340//determination of adult lifespan;GO:0008360//regulation of cell shape;GO:0009987//cellular process;GO:0010033//response to organic substance;GO:0010259//multicellular organism aging;GO:0032501//multicellular organismal process;GO:003…	--
Unigene0023101	2	0	6	0	0	29	20	13	12	32	0.76	0	2.06	0	0	7.21	3.81	4.2	3.44	8.47	0.564	5.426	3.26612198	0.000463374	0.005243518	--	-	-	-	-	-	-	-	-	--
Unigene0026418	10	16	12	26	25	229	219	161	17	418	0.23	0.32	0.25	0.43	0.45	3.45	2.53	3.15	0.3	6.71	0.336	3.228	3.26410744	3.01E-07	7.50E-06	Tf2-12	XP_030854481.1 uncharacterized protein LOC591742 [Strongylocentrotus purpuratus]	-	-	-	-	-	GO:0004190//aspartic-type endopeptidase activity	GO:0006508//proteolysis;GO:0008150//biological_process;GO:0015074//DNA integration	--
Unigene0011123	26	55	7	31	22	530	334	137	200	534	6.6	12.23	1.59	5.56	4.36	87.5	42.23	29.39	38.11	93.92	6.068	58.23	3.262469628	1.68E-10	7.37E-09	--	KAG7171489.1 hypothetical protein Hamer_G018610 [Homarus americanus]	-	-	-	-	-	-	-	--
Unigene0027314	0	4	5	11	4	82	48	61	13	61	0	0.85	1.09	1.89	0.76	12.99	5.82	12.56	2.38	10.29	0.918	8.808	3.26224841	2.55E-06	5.32E-05	--	-	-	-	-	-	-	-	-	--
Unigene0030312	132	129	113	222	166	2780	2179	1556	749	1864	4.19	3.58	3.22	4.98	4.11	57.37	34.44	41.73	17.84	40.98	4.016	38.472	3.259977657	2.36E-24	5.40E-22	sec31a	XP_045138812.1 protein transport protein Sec31A-like isoform X5 [Portunus trituberculatus]	Genetic Information Processing	Folding, sorting and degradation	ko04141//Protein processing in endoplasmic reticulum	K14005	GO:0000139//Golgi membrane;GO:0005575//cellular_component;GO:0005622//intracellular anatomical structure;GO:0005737//cytoplasm;GO:0005783//endoplasmic reticulum;GO:0005789//endoplasmic reticulum membrane;GO:0005794//Golgi apparatus;GO:0005795//Golgi stack;GO:0005798//Golgi-associated vesicle;GO:0005856//cytoskeleton;GO:0005937//mating projection;GO:0012505//endomembrane system;GO:0012506//vesicle…	GO:0003674//molecular_function;GO:0005198//structural molecule activity;GO:0005515//protein binding	GO:0006355//regulation of transcription, DNA-templated;GO:0006810//transport;GO:0006886//intracellular protein transport;GO:0006888//endoplasmic reticulum to Golgi vesicle-mediated transport;GO:0006900//vesicle budding from membrane;GO:0006996//organelle organization;GO:0006997//nucleus organization;GO:0006998//nuclear envelope organization;GO:0007155//cell adhesion;GO:0008104//protein localizati…	--
Unigene0009475	14	14	22	60	46	522	635	154	269	290	1.28	1.12	1.8	3.87	3.28	31	28.88	11.88	18.44	18.34	2.27	21.708	3.257462611	2.40E-13	1.66E-11	DPM3	XP_045102941.1 dolichol-phosphate mannosyltransferase subunit 3-like [Portunus trituberculatus]	Metabolism;Metabolism	Global and overview maps;Glycan biosynthesis and metabolism	ko01100//Metabolic pathways;ko00510//N-Glycan biosynthesis	K09659;K09659	-	-	GO:0006486//protein glycosylation	--
Unigene0005350	4	6	3	5	3	114	24	18	63	33	0.24	0.31	0.16	0.21	0.14	4.37	0.7	0.9	2.79	1.35	0.212	2.022	3.253646827	3.04E-06	6.26E-05	ZMYM1	QQP55442.1 Uncharacterized protein FKW44_008624, partial [Caligus rogercresseyi]	-	-	-	-	-	GO:0046983//protein dimerization activity	-	--
Unigene0043745	1	11	2	4	1	38	34	56	58	29	0.12	1.18	0.22	0.35	0.1	3.03	2.08	5.8	5.34	2.46	0.394	3.742	3.247542024	3.88E-06	7.81E-05	--	-	-	-	-	-	-	-	-	--
Unigene0031919	4	2	0	0	13	95	89	27	11	19	0.19	0.09	0	0	0.49	3	2.16	1.11	0.4	0.64	0.154	1.462	3.246941055	0.001465111	0.013930096	Chdh	XP_045102126.1 neither inactivation nor afterpotential protein G-like isoform X1 [Portunus trituberculatus]	Metabolism;Metabolism	Global and overview maps;Amino acid metabolism	ko01100//Metabolic pathways;ko00260//Glycine, serine and threonine metabolism	K00108;K00108	-	GO:0000166//nucleotide binding;GO:0003674//molecular_function;GO:0003824//catalytic activity;GO:0005488//binding;GO:0008767//UDP-galactopyranose mutase activity;GO:0008812//choline dehydrogenase activity;GO:0016491//oxidoreductase activity;GO:0016614//oxidoreductase activity, acting on CH-OH group of donors;GO:0016701//oxidoreductase activity, acting on single donors with incorporation of molecul…	GO:0000902//cell morphogenesis;GO:0000904//cell morphogenesis involved in differentiation;GO:0001523//retinoid metabolic process;GO:0001654//eye development;GO:0001745//compound eye morphogenesis;GO:0001751//compound eye photoreceptor cell differentiation;GO:0001754//eye photoreceptor cell differentiation;GO:0003008//system process;GO:0006629//lipid metabolic process;GO:0006720//isoprenoid metabo…	--
Unigene0037798	172	157	172	89	225	2749	1833	2308	1346	1432	17.16	13.73	15.41	6.28	17.52	178.46	91.14	194.7	100.86	99.03	14.02	132.838	3.244109653	4.93E-16	4.93E-14	--	-	-	-	-	-	-	-	-	--
Unigene0040671	135	169	234	225	156	2940	2721	1869	1423	1956	6.81	7.47	10.6	8.03	6.14	96.53	68.43	79.74	53.93	68.42	7.81	73.41	3.232582149	4.36E-40	3.24E-37	sec23a	XP_045103630.1 protein transport protein Sec23A-like isoform X2 [Portunus trituberculatus]	Genetic Information Processing	Folding, sorting and degradation	ko04141//Protein processing in endoplasmic reticulum	K14006	GO:0000139//Golgi membrane;GO:0005575//cellular_component;GO:0005622//intracellular anatomical structure;GO:0005737//cytoplasm;GO:0005783//endoplasmic reticulum;GO:0005789//endoplasmic reticulum membrane;GO:0005794//Golgi apparatus;GO:0005795//Golgi stack;GO:0005798//Golgi-associated vesicle;GO:0012505//endomembrane system;GO:0012506//vesicle membrane;GO:0012507//ER to Golgi transport vesicle mem…	GO:0003674//molecular_function;GO:0005096//GTPase activator activity;GO:0005488//binding;GO:0008047//enzyme activator activity;GO:0008270//zinc ion binding;GO:0030234//enzyme regulator activity;GO:0030695//GTPase regulator activity;GO:0043167//ion binding;GO:0043169//cation binding;GO:0046872//metal ion binding;GO:0046914//transition metal ion binding;GO:0060589//nucleoside-triphosphatase regulat…	GO:0002164//larval development;GO:0002165//instar larval or pupal development;GO:0002168//instar larval development;GO:0003002//regionalization;GO:0003330//regulation of extracellular matrix constituent secretion;GO:0003331//positive regulation of extracellular matrix constituent secretion;GO:0003400//regulation of COPII vesicle coating;GO:0006810//transport;GO:0006886//intracellular protein tran…	--
Unigene0010326	4	8	7	16	8	103	125	99	43	118	0.52	0.91	0.82	1.47	0.81	8.72	8.1	10.89	4.2	10.64	0.906	8.51	3.231576177	3.94E-13	2.66E-11	--	XP_045116089.1 sialin-like isoform X1 [Portunus trituberculatus]	-	-	-	-	-	-	-	--
Unigene0032832	301	360	163	369	292	1837	799	5849	2148	5174	60.35	63.25	29.35	52.32	45.68	239.67	79.84	991.63	323.49	719.13	50.19	470.752	3.229495373	8.44E-09	2.83E-07	--	-	-	-	-	-	-	-	-	--
Unigene0029224	1	0	2	6	0	13	41	27	1	20	0.23	0	0.41	0.96	0	1.91	4.61	5.15	0.17	3.13	0.32	2.994	3.225930411	0.002883956	0.024631594	--	-	-	-	-	-	-	GO:0005515//protein binding;GO:0005524//ATP binding;GO:0046872//metal ion binding	-	--
Unigene0020466	7	9	12	16	9	166	209	122	39	95	0.47	0.53	0.73	0.76	0.47	7.27	7.01	6.95	1.97	4.43	0.592	5.526	3.222566481	7.93E-12	4.36E-10	--	KAG0724056.1 Nuclear fragile X mental retardation-interacting protein 1 [Chionoecetes opilio]	-	-	-	-	-	-	-	--
Unigene0031061	1	1	0	2	1	10	4	17	7	14	0.19	0.17	0	0.27	0.15	1.25	0.38	2.75	1.01	1.86	0.156	1.45	3.216434966	0.003478416	0.028805154	CYTB5-D	XP_045132731.1 cytochrome b5-like [Portunus trituberculatus]	-	-	-	-	-	GO:0003674//molecular_function;GO:0005488//binding;GO:0020037//heme binding;GO:0046906//tetrapyrrole binding;GO:0097159//organic cyclic compound binding;GO:1901363//heterocyclic compound binding	-	--
Unigene0007913	0	0	2	6	1	35	10	18	18	10	0	0	0.38	0.89	0.16	4.76	1.04	3.18	2.82	1.45	0.286	2.65	3.211905308	0.000861118	0.00889167	--	-	-	-	-	-	GO:0005634//nucleus;GO:0005741//mitochondrial outer membrane;GO:0016021//integral component of membrane	GO:0003924//GTPase activity	GO:0006260//DNA replication;GO:0008053//mitochondrial fusion	--
Unigene0010235	2	4	0	4	2	24	7	48	26	17	0.18	0.32	0	0.26	0.14	1.43	0.32	3.71	1.79	1.08	0.18	1.666	3.210319589	0.000269732	0.003284247	snk	XP_045129366.1 venom protease-like [Portunus trituberculatus]	-	-	-	-	-	GO:0004222//metalloendopeptidase activity;GO:0004252//serine-type endopeptidase activity	GO:0006508//proteolysis	--
Unigene0003268	6	26	8	9	9	240	208	96	39	124	0.52	1.98	0.62	0.55	0.61	13.56	9	7.05	2.54	7.46	0.856	7.922	3.210182	8.59E-09	2.88E-07	--	KAA3669829.1 uncharacterized protein DEA37_0001408, partial [Paragonimus westermani]	-	-	-	-	-	GO:0003964//RNA-directed DNA polymerase activity	GO:0000373//Group II intron splicing	--
Unigene0019987	0	8	3	4	4	84	23	62	1	37	0	0.58	0.22	0.23	0.26	4.49	0.94	4.31	0.06	2.11	0.258	2.382	3.206730442	0.00102695	0.010312577	--	KAG0710324.1 Retrotransposable element SLACS protein [Chionoecetes opilio]	-	-	-	-	-	-	-	--
Unigene0046461	2	2	2	2	9	32	57	36	26	42	0.18	0.16	0.16	0.13	0.64	1.89	2.57	2.76	1.77	2.64	0.254	2.326	3.194950695	3.07E-07	7.66E-06	SRSF4	XP_042894396.1 serine-arginine protein 55-like isoform X3 [Penaeus japonicus]	Genetic Information Processing	Transcription	ko03040//Spliceosome	K12893	GO:0000785//chromatin;GO:0000786//nucleosome;GO:0005575//cellular_component;GO:0005622//intracellular anatomical structure;GO:0005634//nucleus;GO:0005654//nucleoplasm;GO:0005694//chromosome;GO:0005700//polytene chromosome;GO:0005730//nucleolus;GO:0005737//cytoplasm;GO:0010494//cytoplasmic stress granule;GO:0016604//nuclear body;GO:0016607//nuclear speck;GO:0031974//membrane-enclosed lumen;GO:0031…	GO:0000993//RNA polymerase II complex binding;GO:0001067//transcription regulatory region nucleic acid binding;GO:0001069//regulatory region RNA binding;GO:0001098//basal transcription machinery binding;GO:0001099//basal RNA polymerase II transcription machinery binding;GO:0003674//molecular_function;GO:0003676//nucleic acid binding;GO:0003677//DNA binding;GO:0003723//RNA binding;GO:0003727//sing…	GO:0000075//cell cycle checkpoint signaling;GO:0000122//negative regulation of transcription by RNA polymerase II;GO:0000278//mitotic cell cycle;GO:0000375//RNA splicing, via transesterification reactions;GO:0000377//RNA splicing, via transesterification reactions with bulged adenosine as nucleophile;GO:0000381//regulation of alternative mRNA splicing, via spliceosome;GO:0000398//mRNA splicing, v…	--
Unigene0036792	138	127	147	81	308	2444	2147	1619	1374	1623	12.64	10.19	12.09	5.25	22.01	145.68	98.02	125.4	94.53	103.06	12.436	113.338	3.188037223	1.91E-14	1.54E-12	--	-	-	-	-	-	-	-	GO:0015979//photosynthesis	--
Unigene0020949	0	5	3	8	13	17	17	184	31	14	0	1.57	0.97	2.03	3.64	3.97	3.04	55.87	8.36	3.49	1.642	14.946	3.186233395	0.001949014	0.017749065	--	-	-	-	-	-	-	-	-	--
Unigene0044683	2	1	0	10	1	14	40	26	28	36	0.25	0.11	0	0.87	0.1	1.13	2.46	2.72	2.6	3.08	0.266	2.398	3.172333508	4.94E-05	0.000743279	--	-	-	-	-	-	GO:0016021//integral component of membrane	GO:0015450//protein-transporting ATPase activity	GO:0009306//protein secretion	--
Unigene0011791	11	12	12	16	18	244	214	88	126	122	0.85	0.81	0.83	0.87	1.09	12.27	8.24	5.75	7.31	6.54	0.89	8.022	3.172084725	4.33E-17	4.90E-15	METTL6	XP_045103461.1 tRNA N(3)-methylcytidine methyltransferase METTL6-like [Portunus trituberculatus]	-	-	-	-	GO:0005575//cellular_component;GO:0005737//cytoplasm	GO:0000179//rRNA (adenine-N6,N6-)-dimethyltransferase activity;GO:0003674//molecular_function;GO:0003824//catalytic activity;GO:0008168//methyltransferase activity;GO:0008171//O-methyltransferase activity;GO:0008173//RNA methyltransferase activity;GO:0008175//tRNA methyltransferase activity;GO:0008176//tRNA (guanine-N7-)-methyltransferase activity;GO:0008757//S-adenosylmethionine-dependent methyl…	GO:0000154//rRNA modification;GO:0001510//RNA methylation;GO:0002946//tRNA C5-cytosine methylation;GO:0006139//nucleobase-containing compound metabolic process;GO:0006396//RNA processing;GO:0006399//tRNA metabolic process;GO:0006400//tRNA modification;GO:0006412//translation;GO:0006725//cellular aromatic compound metabolic process;GO:0006807//nitrogen compound metabolic process;GO:0008033//tRNA p…	--
Unigene0019821	8	4	3	2	1	42	15	77	37	29	1.34	0.59	0.45	0.24	0.13	4.58	1.25	10.92	4.66	3.37	0.55	4.956	3.171672664	3.41E-05	0.000537673	--	XP_038063244.1 uncharacterized protein LOC119733952 [Patiria miniata]	-	-	-	-	-	GO:0004616//phosphogluconate dehydrogenase (decarboxylating) activity	GO:0006098//pentose-phosphate shunt	--
Unigene0037153	2	3	2	0	2	38	21	12	7	30	0.23	0.3	0.21	0	0.18	2.86	1.21	1.17	0.61	2.4	0.184	1.65	3.164688353	0.000187723	0.002396336	--	-	-	-	-	-	-	-	-	--
Unigene0047596	1	3	1	0	2	36	28	5	13	6	0.1	0.25	0.09	0	0.15	2.23	1.33	0.4	0.93	0.4	0.118	1.058	3.164480863	0.001214937	0.01187121	--	-	-	-	-	-	-	-	-	--
Unigene0011092	7	0	0	3	0	15	29	25	28	22	1.83	0	0	0.56	0	2.56	3.79	5.54	5.51	4	0.478	4.28	3.162528273	0.0002835	0.003429834	--	-	-	-	-	-	-	-	-	--
Unigene0018652	0	5	2	2	0	23	33	13	13	22	0	1.42	0.58	0.46	0	4.86	5.34	3.57	3.17	4.95	0.492	4.378	3.153541734	7.21E-05	0.001038176	--	-	-	-	-	-	-	GO:0008270//zinc ion binding	-	--
Unigene0030174	952	971	869	784	1030	12912	14886	10925	5575	8385	54.3	48.53	44.51	31.62	45.84	479.23	423.16	526.9	238.84	331.53	44.96	399.932	3.15304078	6.53E-26	1.71E-23	Cct6a	XP_045133822.1 T-complex protein 1 subunit zeta-like [Portunus trituberculatus]	-	-	-	-	GO:0005575//cellular_component;GO:0005622//intracellular anatomical structure;GO:0005737//cytoplasm;GO:0005829//cytosol;GO:0005832//chaperonin-containing T-complex;GO:0005856//cytoskeleton;GO:0032991//protein-containing complex;GO:0043226//organelle;GO:0043228//non-membrane-bounded organelle;GO:0043229//intracellular organelle;GO:0043232//intracellular non-membrane-bounded organelle;GO:0101031//c…	GO:0000166//nucleotide binding;GO:0003674//molecular_function;GO:0005215//transporter activity;GO:0005488//binding;GO:0005515//protein binding;GO:0005524//ATP binding;GO:0016887//ATP hydrolysis activity;GO:0017076//purine nucleotide binding;GO:0030554//adenyl nucleotide binding;GO:0032553//ribonucleotide binding;GO:0032555//purine ribonucleotide binding;GO:0032559//adenyl ribonucleotide binding;G…	GO:0000003//reproduction;GO:0000226//microtubule cytoskeleton organization;GO:0006457//protein folding;GO:0006458//'de novo' protein folding;GO:0006810//transport;GO:0006996//organelle organization;GO:0007010//cytoskeleton organization;GO:0007017//microtubule-based process;GO:0007049//cell cycle;GO:0007098//centrosome cycle;GO:0007099//centriole replication;GO:0007276//gamete generation;GO:000728…	--
Unigene0021069	9	24	26	20	12	274	218	258	113	134	0.89	2.08	2.3	1.4	0.92	17.59	10.72	21.53	8.38	9.17	1.518	13.478	3.150362735	5.61E-13	3.67E-11	--	-	-	-	-	-	-	-	-	--
Unigene0026232	0	3	8	4	0	86	36	10	25	15	0	0.71	1.95	0.77	0	15.21	4.88	2.3	5.11	2.83	0.686	6.066	3.144465016	0.000510931	0.005713376	--	-	-	-	-	-	GO:0005737//cytoplasm;GO:0005852//eukaryotic translation initiation factor 3 complex	GO:0003743//translation initiation factor activity	-	--
Unigene0028462	7	0	3	12	1	35	13	31	54	103	1.1	0	0.42	1.33	0.12	3.57	1.02	4.11	6.36	11.2	0.594	5.252	3.14433208	0.000164946	0.002146412	--	-	-	-	-	-	-	-	-	--
Unigene0018705	16	20	22	20	10	296	222	184	166	116	1.41	1.55	1.75	1.25	0.69	17.03	9.78	13.75	11.02	7.11	1.33	11.738	3.141688462	2.55E-16	2.69E-14	--	-	-	-	-	-	-	-	-	--
Unigene0004565	12	23	8	22	31	244	180	177	94	331	2.92	4.9	1.75	3.78	5.88	38.59	21.8	36.37	17.16	55.76	3.846	33.936	3.141385858	1.03E-11	5.56E-10	--	-	-	-	-	-	-	-	-	--
Unigene0040338	3	3	4	5	3	150	3	18	5	22	0.27	0.23	0.32	0.31	0.21	8.63	0.13	1.35	0.33	1.35	0.268	2.358	3.137258813	0.002040474	0.01846088	--	-	-	-	-	-	-	-	-	--
Unigene0030614	336	396	382	519	462	4342	5788	3390	5939	3449	22.46	23.19	22.93	24.53	24.09	188.83	192.79	191.58	298.14	159.79	23.44	206.226	3.137181757	5.43E-38	3.10E-35	enpl-1	AGC54636.1 heat shock protein 90 [Scylla paramamosain]	Genetic Information Processing	Folding, sorting and degradation	ko04141//Protein processing in endoplasmic reticulum	K09487	GO:0005575//cellular_component;GO:0005576//extracellular region;GO:0005615//extracellular space;GO:0005622//intracellular anatomical structure;GO:0005737//cytoplasm;GO:0005783//endoplasmic reticulum;GO:0005788//endoplasmic reticulum lumen;GO:0005789//endoplasmic reticulum membrane;GO:0005790//smooth endoplasmic reticulum;GO:0005794//Golgi apparatus;GO:0005798//Golgi-associated vesicle;GO:0005829/…	GO:0000166//nucleotide binding;GO:0003674//molecular_function;GO:0003676//nucleic acid binding;GO:0003723//RNA binding;GO:0005102//signaling receptor binding;GO:0005488//binding;GO:0005509//calcium ion binding;GO:0005515//protein binding;GO:0005524//ATP binding;GO:0016887//ATP hydrolysis activity;GO:0017076//purine nucleotide binding;GO:0019899//enzyme binding;GO:0019902//phosphatase binding;GO:0…	GO:0001666//response to hypoxia;GO:0002218//activation of innate immune response;GO:0002221//pattern recognition receptor signaling pathway;GO:0002224//toll-like receptor signaling pathway;GO:0002253//activation of immune response;GO:0002376//immune system process;GO:0002682//regulation of immune system process;GO:0002684//positive regulation of immune system process;GO:0002757//immune response-a…	--
Unigene0023892	6	4	6	9	4	74	94	67	35	51	1.16	0.68	1.04	1.23	0.6	9.29	9.04	10.93	5.07	6.82	0.942	8.23	3.127093466	5.51E-11	2.64E-09	kdm5bb	XP_045102597.1 lysine-specific demethylase 5A-like isoform X2 [Portunus trituberculatus]	-	-	-	-	GO:0000118//histone deacetylase complex;GO:0000228//nuclear chromosome;GO:0000785//chromatin;GO:0005575//cellular_component;GO:0005622//intracellular anatomical structure;GO:0005634//nucleus;GO:0005654//nucleoplasm;GO:0005694//chromosome;GO:0005737//cytoplasm;GO:0031974//membrane-enclosed lumen;GO:0031981//nuclear lumen;GO:0032991//protein-containing complex;GO:0043226//organelle;GO:0043227//memb…	GO:0003674//molecular_function;GO:0003676//nucleic acid binding;GO:0003677//DNA binding;GO:0003824//catalytic activity;GO:0005488//binding;GO:0005515//protein binding;GO:0016491//oxidoreductase activity;GO:0016705//oxidoreductase activity, acting on paired donors, with incorporation or reduction of molecular oxygen;GO:0016831//carboxy-lyase activity;GO:0032451//demethylase activity;GO:0032452//hi…	GO:0000003//reproduction;GO:0000122//negative regulation of transcription by RNA polymerase II;GO:0000183//rDNA heterochromatin assembly;GO:0002164//larval development;GO:0003006//developmental process involved in reproduction;GO:0006139//nucleobase-containing compound metabolic process;GO:0006325//chromatin organization;GO:0006355//regulation of transcription, DNA-templated;GO:0006357//regulatio…	--
Unigene0002409	14	30	23	11	33	223	171	315	262	188	1.4	2.63	2.07	0.78	2.58	14.53	8.53	26.67	19.7	13.05	1.892	16.496	3.124132244	4.52E-11	2.20E-09	--	-	-	-	-	-	-	-	-	--
Unigene0005520	0	0	6	4	1	32	31	25	9	21	0	0	0.67	0.35	0.1	2.58	1.91	2.62	0.84	1.8	0.224	1.95	3.121903487	0.000202446	0.002554585	--	-	-	-	-	-	-	-	-	--
Unigene0041991	23	21	17	13	10	213	225	160	153	202	1.46	1.17	0.97	0.58	0.49	8.78	7.1	8.57	7.28	8.87	0.934	8.12	3.119985272	9.25E-22	1.70E-19	--	-	-	-	-	-	-	-	-	--
Unigene0018651	5	0	2	7	4	31	50	35	31	43	0.5	0	0.18	0.5	0.31	2.04	2.51	2.99	2.35	3.01	0.298	2.58	3.11398683	8.84E-08	2.46E-06	--	-	-	-	-	-	-	GO:0003676//nucleic acid binding;GO:0004523//RNA-DNA hybrid ribonuclease activity	-	--
Unigene0002121	10	59	58	33	7	843	374	141	119	416	1.07	5.55	5.59	2.51	0.59	58.92	20.02	12.81	9.6	30.97	3.062	26.464	3.111484952	1.92E-06	4.11E-05	--	-	-	-	-	-	-	-	-	--
Unigene0025724	90	97	124	212	134	1859	1728	1262	934	1199	7.55	7.13	9.35	12.58	8.78	101.53	72.28	89.56	58.88	69.76	9.078	78.402	3.110444064	2.18E-34	9.89E-32	Erp29	XP_045123302.1 endoplasmic reticulum resident protein 29-like [Portunus trituberculatus]	Genetic Information Processing	Folding, sorting and degradation	ko04141//Protein processing in endoplasmic reticulum	K09586	GO:0005575//cellular_component;GO:0005622//intracellular anatomical structure;GO:0005737//cytoplasm;GO:0005783//endoplasmic reticulum;GO:0005788//endoplasmic reticulum lumen;GO:0005790//smooth endoplasmic reticulum;GO:0009986//cell surface;GO:0012505//endomembrane system;GO:0030133//transport vesicle;GO:0031410//cytoplasmic vesicle;GO:0031974//membrane-enclosed lumen;GO:0031982//vesicle;GO:004247…	GO:0003674//molecular_function;GO:0003756//protein disulfide isomerase activity;GO:0005488//binding;GO:0005515//protein binding;GO:0042802//identical protein binding;GO:0042803//protein homodimerization activity;GO:0046983//protein dimerization activity;GO:0051087//chaperone binding	GO:0000003//reproduction;GO:0001932//regulation of protein phosphorylation;GO:0001934//positive regulation of protein phosphorylation;GO:0002790//peptide secretion;GO:0002791//regulation of peptide secretion;GO:0002792//negative regulation of peptide secretion;GO:0003002//regionalization;GO:0003006//developmental process involved in reproduction;GO:0006457//protein folding;GO:0006508//proteolysis…	--
Unigene0000611	11	20	4	24	14	146	258	109	86	198	1.38	2.19	0.45	2.12	1.37	11.9	16.1	11.54	8.09	17.18	1.502	12.962	3.109331621	7.27E-15	6.19E-13	--	-	-	-	-	-	GO:0005789//endoplasmic reticulum membrane	GO:0003700//DNA-binding transcription factor activity	GO:0006355//regulation of transcription, DNA-templated	--
Unigene0036791	32	17	39	14	60	494	316	362	192	385	9.04	4.21	9.89	2.8	13.23	90.81	44.49	86.47	40.74	75.4	7.834	67.582	3.108818012	4.51E-10	1.85E-08	--	-	-	-	-	-	-	-	-	--
Unigene0017467	4	0	0	0	3	8	16	18	18	18	0.95	0	0	0	0.56	1.24	1.9	3.63	3.22	2.97	0.302	2.592	3.101445264	0.001648255	0.015404178	--	-	-	-	-	-	-	GO:0016746//acyltransferase activity	-	--
Unigene0046359	61	89	87	180	96	1227	1790	795	991	703	2.47	3.16	3.16	5.15	3.03	32.32	36.12	27.21	30.13	19.73	3.394	29.102	3.100059834	1.75E-29	5.79E-27	prdm10	XP_045101869.1 PR domain zinc finger protein 10-like isoform X1 [Portunus trituberculatus]	-	-	-	-	-	-	-	--
Unigene0039418	0	2	1	0	2	9	19	9	7	11	0	0.3	0.16	0	0.27	1.02	1.65	1.32	0.91	1.33	0.146	1.246	3.093263794	0.00247983	0.021741701	BMT2	XP_045106214.1 S-adenosylmethionine sensor upstream of mTORC1-like, partial [Portunus trituberculatus]	-	-	-	-	GO:0005575//cellular_component;GO:0005622//intracellular anatomical structure;GO:0005634//nucleus;GO:0005730//nucleolus;GO:0031974//membrane-enclosed lumen;GO:0031981//nuclear lumen;GO:0032991//protein-containing complex;GO:0035859//Seh1-associated complex;GO:0043226//organelle;GO:0043227//membrane-bounded organelle;GO:0043228//non-membrane-bounded organelle;GO:0043229//intracellular organelle;GO…	GO:0003674//molecular_function;GO:0003824//catalytic activity;GO:0004197//cysteine-type endopeptidase activity;GO:0005488//binding;GO:0008168//methyltransferase activity;GO:0008173//RNA methyltransferase activity;GO:0008649//rRNA methyltransferase activity;GO:0008757//S-adenosylmethionine-dependent methyltransferase activity;GO:0016433//rRNA (adenine) methyltransferase activity;GO:0016740//transf…	GO:0000154//rRNA modification;GO:0001510//RNA methylation;GO:0006139//nucleobase-containing compound metabolic process;GO:0006364//rRNA processing;GO:0006396//RNA processing;GO:0006508//proteolysis;GO:0006725//cellular aromatic compound metabolic process;GO:0006807//nitrogen compound metabolic process;GO:0006950//response to stress;GO:0007154//cell communication;GO:0008150//biological_process;GO:…	--
Unigene0013652	26	133	72	45	146	770	531	808	710	1477	3.64	16.3	9.04	4.45	15.94	70.09	37.02	95.57	74.6	143.22	9.874	84.1	3.09039925	7.24E-09	2.45E-07	--	-	-	-	-	-	GO:0005765//lysosomal membrane;GO:0016020//membrane	GO:0005515//protein binding;GO:0015078//proton transmembrane transporter activity	-	--
Unigene0021643	0	0	0	4	2	16	13	12	9	5	0	0	0	0.37	0.2	1.36	0.84	1.32	0.88	0.45	0.114	0.97	3.088950923	0.005536178	0.042499807	--	-	-	-	-	-	-	-	-	--
Unigene0039433	66	76	66	125	95	1194	1324	591	733	761	2.91	2.93	2.61	3.89	3.26	34.21	29.05	22	24.24	23.22	3.12	26.544	3.088767857	5.29E-39	3.20E-36	Wdr92	XP_045117685.1 dynein axonemal assembly factor 10-like [Portunus trituberculatus]	-	-	-	-	GO:0005575//cellular_component;GO:0005622//intracellular anatomical structure;GO:0005955//calcineurin complex;GO:0008287//protein serine/threonine phosphatase complex;GO:0032991//protein-containing complex;GO:1902494//catalytic complex;GO:1903293//phosphatase complex	GO:0003674//molecular_function;GO:0005488//binding;GO:0005515//protein binding;GO:0019904//protein domain specific binding;GO:0032182//ubiquitin-like protein binding;GO:0043130//ubiquitin binding	GO:0006355//regulation of transcription, DNA-templated;GO:0006357//regulation of transcription by RNA polymerase II;GO:0006915//apoptotic process;GO:0007154//cell communication;GO:0007165//signal transduction;GO:0008150//biological_process;GO:0008219//cell death;GO:0009889//regulation of biosynthetic process;GO:0009891//positive regulation of biosynthetic process;GO:0009893//positive regulation o…	--
Unigene0011114	31	22	26	36	35	455	361	275	199	305	2.28	1.42	1.72	1.87	2.01	21.78	13.24	17.11	11	15.56	1.86	15.738	3.080877687	2.06E-23	4.26E-21	Slc22a6	XP_045130792.1 LOW QUALITY PROTEIN: solute carrier family 22 member 15-like [Portunus trituberculatus]	-	-	-	-	GO:0005887//integral component of plasma membrane	GO:0008028//monocarboxylic acid transmembrane transporter activity;GO:0022857//transmembrane transporter activity;GO:0042910//xenobiotic transmembrane transporter activity	GO:0015718//monocarboxylic acid transport;GO:0042908//xenobiotic transport;GO:0055085//transmembrane transport	--
Unigene0032679	16	24	30	21	17	193	185	265	312	147	1.85	2.43	3.12	1.72	1.54	14.54	10.67	25.94	27.13	11.8	2.132	18.016	3.078999389	3.41E-13	2.32E-11	SPAC4H3.07c	XP_045137972.1 putative thiosulfate sulfurtransferase, mitochondrial [Portunus trituberculatus]	-	-	-	-	-	GO:0003674//molecular_function;GO:0003824//catalytic activity;GO:0004792//thiosulfate sulfurtransferase activity;GO:0016740//transferase activity;GO:0016782//transferase activity, transferring sulphur-containing groups;GO:0016783//sulfurtransferase activity	-	--
Unigene0005328	36	27	14	20	86	698	249	391	445	75	11.92	7.83	4.16	4.68	22.22	150.39	41.09	109.47	110.67	17.21	10.162	85.766	3.077221468	6.32E-06	0.000120976	--	XP_045117070.1 F-box/WD repeat-containing protein 7-like [Portunus trituberculatus]	-	-	-	-	-	-	-	--
Unigene0001181	6	13	15	16	11	183	204	85	50	142	0.48	0.9	1.07	0.9	0.68	9.45	8.07	5.7	2.98	7.81	0.806	6.802	3.077107262	1.24E-12	7.75E-11	--	-	-	-	-	-	-	-	-	--
Unigene0045796	56	87	27	60	33	1052	401	513	361	438	2.82	3.84	1.22	2.14	1.3	34.49	10.07	21.86	13.66	15.3	2.264	19.076	3.074812825	3.89E-12	2.26E-10	--	XP_045120524.1 transcription factor kayak-like isoform X4 [Portunus trituberculatus]	Environmental Information Processing	Signal transduction	ko04010//MAPK signaling pathway	K04379	GO:0005575//cellular_component;GO:0005622//intracellular anatomical structure;GO:0005634//nucleus;GO:0005654//nucleoplasm;GO:0005667//transcription regulator complex;GO:0005737//cytoplasm;GO:0031974//membrane-enclosed lumen;GO:0031981//nuclear lumen;GO:0032991//protein-containing complex;GO:0043226//organelle;GO:0043227//membrane-bounded organelle;GO:0043229//intracellular organelle;GO:0043231//i…	GO:0000976//transcription cis-regulatory region binding;GO:0000977//RNA polymerase II transcription regulatory region sequence-specific DNA binding;GO:0000981//DNA-binding transcription factor activity, RNA polymerase II-specific;GO:0001067//transcription regulatory region nucleic acid binding;GO:0001228//DNA-binding transcription activator activity, RNA polymerase II-specific;GO:0003674//molecul…	GO:0000003//reproduction;GO:0000079//regulation of cyclin-dependent protein serine/threonine kinase activity;GO:0000278//mitotic cell cycle;GO:0000902//cell morphogenesis;GO:0000904//cell morphogenesis involved in differentiation;GO:0001654//eye development;GO:0001661//conditioned taste aversion;GO:0001666//response to hypoxia;GO:0001667//ameboidal-type cell migration;GO:0001700//embryonic develo…	TF_bZIP
Unigene0037209	13	10	14	21	36	141	202	210	226	158	1.7	1.14	1.64	1.94	3.67	11.98	13.14	23.18	22.16	14.3	2.018	16.952	3.070457413	3.02E-12	1.79E-10	--	-	-	-	-	-	-	-	-	--
Unigene0021784	189	181	137	169	327	1812	2336	1885	2032	2345	44.8	37.6	29.16	28.33	60.48	279.5	275.98	377.83	361.8	385.33	40.074	336.088	3.068100607	1.15E-21	2.08E-19	Cyt-c-p	XP_045115114.1 cytochrome c [Portunus trituberculatus]	Metabolism;Metabolism;Cellular Processes;Cellular Processes	Global and overview maps;Energy metabolism;Cell growth and death;Cell growth and death	ko01100//Metabolic pathways;ko00190//Oxidative phosphorylation;ko04214//Apoptosis - fly;ko04215//Apoptosis - multiple species	K08738;K08738;K08738;K08738	GO:0000159//protein phosphatase type 2A complex;GO:0005575//cellular_component;GO:0005622//intracellular anatomical structure;GO:0005634//nucleus;GO:0005737//cytoplasm;GO:0005739//mitochondrion;GO:0005740//mitochondrial envelope;GO:0005743//mitochondrial inner membrane;GO:0005746//mitochondrial respirasome;GO:0005758//mitochondrial intermembrane space;GO:0005829//cytosol;GO:0008287//protein serin…	GO:0003674//molecular_function;GO:0003824//catalytic activity;GO:0004129//cytochrome-c oxidase activity;GO:0005488//binding;GO:0009055//electron transfer activity;GO:0010242//oxygen evolving activity;GO:0016491//oxidoreductase activity;GO:0020037//heme binding;GO:0043167//ion binding;GO:0043169//cation binding;GO:0046872//metal ion binding;GO:0046906//tetrapyrrole binding;GO:0097159//organic cycl…	GO:0000003//reproduction;GO:0003006//developmental process involved in reproduction;GO:0006091//generation of precursor metabolites and energy;GO:0006119//oxidative phosphorylation;GO:0006122//mitochondrial electron transport, ubiquinol to cytochrome c;GO:0006123//mitochondrial electron transport, cytochrome c to oxygen;GO:0006139//nucleobase-containing compound metabolic process;GO:0006163//puri…	--
Unigene0032209	36	37	38	38	40	405	497	372	310	411	7.67	6.9	7.27	5.72	6.65	56.11	52.74	66.98	49.58	60.66	6.842	57.214	3.063878202	1.62E-39	1.06E-36	SERP2	XP_045116179.1 stress-associated endoplasmic reticulum protein 2-like [Portunus trituberculatus]	-	-	-	-	GO:0005575//cellular_component;GO:0005622//intracellular anatomical structure;GO:0005737//cytoplasm;GO:0005783//endoplasmic reticulum;GO:0005789//endoplasmic reticulum membrane;GO:0005856//cytoskeleton;GO:0005874//microtubule;GO:0005881//cytoplasmic microtubule;GO:0012505//endomembrane system;GO:0015630//microtubule cytoskeleton;GO:0016020//membrane;GO:0016021//integral component of membrane;GO:0…	-	GO:0001501//skeletal system development;GO:0002791//regulation of peptide secretion;GO:0002793//positive regulation of peptide secretion;GO:0005975//carbohydrate metabolic process;GO:0005996//monosaccharide metabolic process;GO:0006006//glucose metabolic process;GO:0006417//regulation of translation;GO:0006464//cellular protein modification process;GO:0006486//protein glycosylation;GO:0006807//ni…	--
Unigene0039523	14	7	8	10	6	219	89	101	58	15	2.2	0.96	1.13	1.11	0.74	22.41	6.98	13.43	6.85	1.64	1.228	10.262	3.062929465	4.83E-06	9.49E-05	ZCCHC24	XP_045128917.1 zinc finger CCHC domain-containing protein 24-like [Portunus trituberculatus]	-	-	-	-	-	-	-	--
Unigene0021987	0	1	1	3	7	18	40	21	30	8	0	0.1	0.1	0.23	0.6	1.29	2.2	1.96	2.48	0.61	0.206	1.708	3.051591732	0.000553339	0.006113735	UGT2B13	XP_045123982.1 UDP-glycosyltransferase UGT5-like isoform X4 [Portunus trituberculatus]	Metabolism;Metabolism;Metabolism;Metabolism;Metabolism;Metabolism;Metabolism;Metabolism	Global and overview maps;Xenobiotics biodegradation and metabolism;Metabolism of cofactors and vitamins;Xenobiotics biodegradation and metabolism;Xenobiotics biodegradation and metabolism;Carbohydrate metabolism;Metabolism of cofactors and vitamins;Carbohydrate metabolism	ko01100//Metabolic pathways;ko00983//Drug metabolism - other enzymes;ko00830//Retinol metabolism;ko00980//Metabolism of xenobiotics by cytochrome P450;ko00982//Drug metabolism - cytochrome P450;ko00040//Pentose and glucuronate interconversions;ko00860//Porphyrin metabolism;ko00053//Ascorbate and aldarate metabolism	K00699;K00699;K00699;K00699;K00699;K00699;K00699;K00699	-	GO:0008194//UDP-glycosyltransferase activity;GO:0016758//hexosyltransferase activity;GO:0050511//undecaprenyldiphospho-muramoylpentapeptide beta-N-acetylglucosaminyltransferase activity	GO:0009252//peptidoglycan biosynthetic process	--
Unigene0001676	1	0	0	2	2	9	18	9	4	11	0.16	0	0	0.23	0.25	0.94	1.44	1.22	0.48	1.22	0.128	1.06	3.049848549	0.004651805	0.036715969	--	XP_045121978.1 uncharacterized protein LOC123510709 [Portunus trituberculatus]	-	-	-	-	-	GO:0003676//nucleic acid binding;GO:0004523//RNA-DNA hybrid ribonuclease activity	-	--
Unigene0008713	17	3	1	3	0	113	43	39	19	65	2.5	0.39	0.13	0.31	0	10.81	3.15	4.85	2.1	6.62	0.666	5.506	3.047410528	0.000450561	0.005129177	--	-	-	-	-	-	-	-	-	--
Unigene0036533	43	61	41	94	42	875	566	533	404	459	1	1.24	0.85	1.54	0.76	13.18	6.53	10.43	7.02	7.37	1.078	8.906	3.046420434	1.90E-22	3.68E-20	Trpm	XP_045135399.1 transient receptor potential cation channel trpm-like isoform X4 [Portunus trituberculatus]	-	-	-	-	GO:0005575//cellular_component;GO:0016020//membrane;GO:0016021//integral component of membrane;GO:0031224//intrinsic component of membrane;GO:0032991//protein-containing complex;GO:0034702//ion channel complex;GO:0034703//cation channel complex;GO:0098796//membrane protein complex;GO:1902495//transmembrane transporter complex;GO:1990351//transporter complex	GO:0003674//molecular_function;GO:0005215//transporter activity;GO:0005216//ion channel activity;GO:0005217//intracellular ligand-gated ion channel activity;GO:0005261//cation channel activity;GO:0005385//zinc ion transmembrane transporter activity;GO:0008324//cation transmembrane transporter activity;GO:0015075//ion transmembrane transporter activity;GO:0015267//channel activity;GO:0015276//liga…	GO:0000041//transition metal ion transport;GO:0006810//transport;GO:0006811//ion transport;GO:0006812//cation transport;GO:0006829//zinc ion transport;GO:0008150//biological_process;GO:0009987//cellular process;GO:0010960//magnesium ion homeostasis;GO:0016043//cellular component organization;GO:0022607//cellular component assembly;GO:0030001//metal ion transport;GO:0034220//ion transmembrane tran…	--
Unigene0005179	1	5	8	2	4	25	46	65	35	28	0.08	0.37	0.61	0.12	0.26	1.38	1.94	4.65	2.23	1.64	0.288	2.368	3.039528364	7.45E-06	0.000139199	--	-	-	-	-	-	-	-	-	--
Unigene0036443	3	1	0	1	2	9	42	9	9	13	0.42	0.12	0	0.1	0.22	0.83	2.95	1.07	0.95	1.27	0.172	1.414	3.03930165	0.001178798	0.011594246	--	-	-	-	-	-	-	-	-	--
Unigene0000172	1	3	1	2	0	18	16	19	10	8	0.15	0.4	0.14	0.21	0	1.77	1.2	2.43	1.13	0.84	0.18	1.474	3.033667713	0.000760529	0.007993714	--	-	-	-	-	-	-	-	-	--
Unigene0016492	26	42	37	80	46	584	778	310	379	329	1	1.42	1.28	2.18	1.38	14.64	14.94	10.1	10.97	8.79	1.452	11.888	3.033392663	1.77E-24	4.14E-22	rnf8-A	XP_045131727.1 E3 ubiquitin-protein ligase RNF8-like isoform X1 [Portunus trituberculatus]	-	-	-	-	GO:0000109//nucleotide-excision repair complex;GO:0005680//anaphase-promoting complex;GO:0016021//integral component of membrane	GO:0004671//protein C-terminal S-isoprenylcysteine carboxyl O-methyltransferase activity;GO:0004842//ubiquitin-protein transferase activity;GO:0005515//protein binding;GO:0005524//ATP binding;GO:0008270//zinc ion binding;GO:0046872//metal ion binding;GO:0061630//ubiquitin protein ligase activity;GO:0097602//cullin family protein binding	GO:0006289//nucleotide-excision repair;GO:0006481//C-terminal protein methylation;GO:0007059//chromosome segregation;GO:0016567//protein ubiquitination;GO:0030261//chromosome condensation;GO:0031145//anaphase-promoting complex-dependent catabolic process	--
Unigene0024388	8	6	2	10	1	65	11	83	47	50	0.49	0.32	0.11	0.43	0.05	2.58	0.33	4.28	2.15	2.12	0.28	2.292	3.033108312	4.26E-05	0.000652287	--	XP_038050892.1 uncharacterized protein LOC119724042 [Patiria miniata]	-	-	-	-	-	-	-	--
Unigene0044041	4	4	5	6	1	51	96	20	12	45	0.36	0.31	0.4	0.38	0.07	2.96	4.27	1.51	0.8	2.78	0.304	2.464	3.018859027	4.92E-06	9.65E-05	--	XP_027222160.1 UPF0472 protein C16orf72 homolog isoform X1 [Penaeus vannamei]	-	-	-	-	-	-	-	--
Unigene0011650	21	3	6	6	11	145	140	97	88	38	3.13	0.39	0.8	0.63	1.28	14.04	10.38	12.21	9.84	3.92	1.246	10.078	3.015833388	5.45E-07	1.30E-05	TXNL4A	XP_042225691.1 thioredoxin-like protein 4A isoform X1 [Homarus americanus]	Genetic Information Processing	Transcription	ko03040//Spliceosome	K12859	GO:0005575//cellular_component;GO:0005622//intracellular anatomical structure;GO:0005634//nucleus;GO:0005681//spliceosomal complex;GO:0005682//U5 snRNP;GO:0005737//cytoplasm;GO:0030532//small nuclear ribonucleoprotein complex;GO:0032991//protein-containing complex;GO:0043226//organelle;GO:0043227//membrane-bounded organelle;GO:0043229//intracellular organelle;GO:0043231//intracellular membrane-bo…	GO:0003674//molecular_function;GO:0015036//disulfide oxidoreductase activity	GO:0000245//spliceosomal complex assembly;GO:0000375//RNA splicing, via transesterification reactions;GO:0000377//RNA splicing, via transesterification reactions with bulged adenosine as nucleophile;GO:0000398//mRNA splicing, via spliceosome;GO:0006139//nucleobase-containing compound metabolic process;GO:0006396//RNA processing;GO:0006397//mRNA processing;GO:0006725//cellular aromatic compound me…	--
Unigene0000328	8	10	8	5	7	63	50	61	36	173	0.57	0.63	0.51	0.25	0.39	2.94	1.78	3.69	1.94	8.59	0.47	3.788	3.010703669	3.35E-07	8.28E-06	--	-	-	-	-	-	GO:0005575//cellular_component;GO:0031237//intrinsic component of periplasmic side of plasma membrane	GO:0003674//molecular_function;GO:0005215//transporter activity	GO:0006810//transport;GO:0030152//bacteriocin biosynthetic process	--
Unigene0015819	167	257	153	232	384	3326	2632	1855	981	3186	6.51	8.78	5.36	6.4	11.69	84.42	51.17	61.18	28.74	86.15	7.748	62.332	3.008077145	1.17E-14	9.68E-13	slgA	XP_045116029.1 LOW QUALITY PROTEIN: proline dehydrogenase 1, mitochondrial-like [Portunus trituberculatus]	Metabolism;Metabolism	Global and overview maps;Amino acid metabolism	ko01100//Metabolic pathways;ko00330//Arginine and proline metabolism	K00318;K00318	GO:0005575//cellular_component;GO:0005622//intracellular anatomical structure;GO:0005737//cytoplasm;GO:0005739//mitochondrion;GO:0005759//mitochondrial matrix;GO:0031974//membrane-enclosed lumen;GO:0043226//organelle;GO:0043227//membrane-bounded organelle;GO:0043229//intracellular organelle;GO:0043231//intracellular membrane-bounded organelle;GO:0043233//organelle lumen;GO:0070013//intracellular …	GO:0000166//nucleotide binding;GO:0003674//molecular_function;GO:0003824//catalytic activity;GO:0004657//proline dehydrogenase activity;GO:0005488//binding;GO:0016491//oxidoreductase activity;GO:0016597//amino acid binding;GO:0016645//oxidoreductase activity, acting on the CH-NH group of donors;GO:0031406//carboxylic acid binding;GO:0036094//small molecule binding;GO:0043167//ion binding;GO:00431…	GO:0006082//organic acid metabolic process;GO:0006520//cellular amino acid metabolic process;GO:0006536//glutamate metabolic process;GO:0006537//glutamate biosynthetic process;GO:0006560//proline metabolic process;GO:0006562//proline catabolic process;GO:0006807//nitrogen compound metabolic process;GO:0007610//behavior;GO:0007626//locomotory behavior;GO:0008150//biological_process;GO:0008152//met…	--
Unigene0017672	13	10	11	20	15	195	182	103	59	162	1.65	1.12	1.26	1.8	1.49	16.15	11.55	11.09	5.64	14.3	1.464	11.746	3.004182084	5.81E-14	4.41E-12	--	-	-	-	-	-	-	-	-	--
Unigene0030615	119	153	132	196	211	1651	2204	1149	1803	1305	17.8	20.06	17.73	20.73	24.63	160.72	164.32	145.34	202.59	135.33	20.19	161.66	3.001249937	3.12E-35	1.48E-32	Hsp90b1	KAG0718524.1 Endoplasmin [Chionoecetes opilio]	Genetic Information Processing	Folding, sorting and degradation	ko04141//Protein processing in endoplasmic reticulum	K09487	GO:0005575//cellular_component;GO:0005576//extracellular region;GO:0005615//extracellular space;GO:0005622//intracellular anatomical structure;GO:0005737//cytoplasm;GO:0005783//endoplasmic reticulum;GO:0005788//endoplasmic reticulum lumen;GO:0005789//endoplasmic reticulum membrane;GO:0005790//smooth endoplasmic reticulum;GO:0005794//Golgi apparatus;GO:0005798//Golgi-associated vesicle;GO:0005829/…	GO:0000166//nucleotide binding;GO:0003674//molecular_function;GO:0003676//nucleic acid binding;GO:0003723//RNA binding;GO:0005102//signaling receptor binding;GO:0005488//binding;GO:0005509//calcium ion binding;GO:0005515//protein binding;GO:0005524//ATP binding;GO:0016887//ATP hydrolysis activity;GO:0017076//purine nucleotide binding;GO:0019899//enzyme binding;GO:0019902//phosphatase binding;GO:0…	GO:0001666//response to hypoxia;GO:0002218//activation of innate immune response;GO:0002221//pattern recognition receptor signaling pathway;GO:0002224//toll-like receptor signaling pathway;GO:0002253//activation of immune response;GO:0002376//immune system process;GO:0002682//regulation of immune system process;GO:0002684//positive regulation of immune system process;GO:0002757//immune response-a…	--
Unigene0047383	0	4	2	1	4	26	37	12	18	19	0	0.35	0.18	0.07	0.31	1.71	1.86	1.02	1.36	1.33	0.182	1.456	3	6.64E-05	0.0009652	CLIPB4	XP_045126196.1 venom serine protease Bi-VSP-like isoform X1 [Portunus trituberculatus]	-	-	-	-	-	GO:0004252//serine-type endopeptidase activity	GO:0006508//proteolysis	--
Unigene0024062	2	1	1	3	3	11	16	37	14	13	1.06	0.47	0.48	1.13	1.24	3.8	4.23	16.6	5.58	4.78	0.876	6.998	2.99793989	0.000545806	0.006040117	--	-	-	-	-	-	-	-	-	--
Unigene0029728	22	20	18	31	12	95	269	304	97	243	2.68	2.13	1.97	2.67	1.14	7.52	16.3	31.26	8.86	20.49	2.118	16.886	2.995053125	1.24E-10	5.61E-09	--	-	-	-	-	-	-	-	-	--
Unigene0042318	492	464	431	762	454	6075	7791	4275	3366	4842	40.11	33.14	31.55	43.92	28.88	322.23	316.51	294.66	206.09	273.6	35.52	282.618	2.992149867	1.29E-53	1.73E-50	CCT3	XP_045111104.1 T-complex protein 1 subunit gamma-like [Portunus trituberculatus]	-	-	-	-	GO:0002199//zona pellucida receptor complex;GO:0005575//cellular_component;GO:0005622//intracellular anatomical structure;GO:0005737//cytoplasm;GO:0005829//cytosol;GO:0005832//chaperonin-containing T-complex;GO:0005856//cytoskeleton;GO:0005874//microtubule;GO:0005886//plasma membrane;GO:0015630//microtubule cytoskeleton;GO:0016020//membrane;GO:0032991//protein-containing complex;GO:0043209//myeli…	GO:0000166//nucleotide binding;GO:0003674//molecular_function;GO:0003824//catalytic activity;GO:0005488//binding;GO:0005515//protein binding;GO:0005524//ATP binding;GO:0016462//pyrophosphatase activity;GO:0016787//hydrolase activity;GO:0016817//hydrolase activity, acting on acid anhydrides;GO:0016818//hydrolase activity, acting on acid anhydrides, in phosphorus-containing anhydrides;GO:0016887//A…	GO:0000003//reproduction;GO:0006457//protein folding;GO:0006458//'de novo' protein folding;GO:0006810//transport;GO:0007338//single fertilization;GO:0007339//binding of sperm to zona pellucida;GO:0008037//cell recognition;GO:0008150//biological_process;GO:0009566//fertilization;GO:0009889//regulation of biosynthetic process;GO:0009891//positive regulation of biosynthetic process;GO:0009893//posit…	--
Unigene0046728	52	103	149	158	214	1944	1719	1298	510	1169	15.38	26.7	39.58	33.05	49.4	374.21	253.44	324.68	113.32	239.72	32.822	261.074	2.991723732	3.60E-12	2.11E-10	Rpb10	KAF6202269.1 hypothetical protein [Apolygus lucorum]	Genetic Information Processing	Transcription	ko03020//RNA polymerase	K03007	GO:0000428//DNA-directed RNA polymerase complex;GO:0005575//cellular_component;GO:0005622//intracellular anatomical structure;GO:0005634//nucleus;GO:0005654//nucleoplasm;GO:0005665//RNA polymerase II, core complex;GO:0005666//RNA polymerase III complex;GO:0005730//nucleolus;GO:0005736//RNA polymerase I complex;GO:0005737//cytoplasm;GO:0005829//cytosol;GO:0016591//RNA polymerase II, holoenzyme;GO:…	GO:0003674//molecular_function;GO:0003676//nucleic acid binding;GO:0003677//DNA binding;GO:0003824//catalytic activity;GO:0003899//DNA-directed 5'-3' RNA polymerase activity;GO:0005488//binding;GO:0008270//zinc ion binding;GO:0016740//transferase activity;GO:0016772//transferase activity, transferring phosphorus-containing groups;GO:0016779//nucleotidyltransferase activity;GO:0034062//5'-3' RNA p…	GO:0000375//RNA splicing, via transesterification reactions;GO:0000377//RNA splicing, via transesterification reactions with bulged adenosine as nucleophile;GO:0000398//mRNA splicing, via spliceosome;GO:0001172//transcription, RNA-templated;GO:0006139//nucleobase-containing compound metabolic process;GO:0006259//DNA metabolic process;GO:0006281//DNA repair;GO:0006283//transcription-coupled nucleo…	--
Unigene0042640	0	1	1	2	1	13	15	10	6	4	0	0.41	0.42	0.66	0.36	3.93	3.47	3.93	2.09	1.29	0.37	2.942	2.991200071	0.005461501	0.042003948	--	-	-	-	-	-	-	-	-	--
Unigene0003336	0	3	0	0	2	14	14	7	5	11	0	0.61	0	0	0.36	2.1	1.61	1.37	0.87	1.76	0.194	1.542	2.990674208	0.006631335	0.049176009	--	-	-	-	-	-	-	-	-	--
Unigene0038879	17	26	9	20	29	211	222	205	137	213	0.59	0.79	0.28	0.49	0.79	4.77	3.85	6.03	3.58	5.13	0.588	4.672	2.990152214	1.35E-16	1.45E-14	ttcA	XP_045105734.1 uncharacterized protein LOC123501165 isoform X1 [Portunus trituberculatus]	-	-	-	-	-	GO:0003674//molecular_function;GO:0003824//catalytic activity;GO:0016879//ligase activity, forming carbon-nitrogen bonds;GO:0030170//pyridoxal phosphate binding;GO:0031071//cysteine desulfurase activity	GO:0006400//tRNA modification;GO:0009058//biosynthetic process;GO:0016226//iron-sulfur cluster assembly	--
Unigene0005178	3	0	1	2	1	12	19	11	19	11	0.56	0	0.17	0.26	0.14	1.45	1.75	1.72	2.64	1.41	0.226	1.794	2.988785213	0.000553696	0.006116057	--	-	-	-	-	-	-	GO:0003674//molecular_function	GO:0030436//asexual sporulation	--
Unigene0018438	5	2	2	3	0	37	24	36	20	4	0.83	0.29	0.3	0.35	0	4.01	1.99	5.07	2.5	0.46	0.354	2.806	2.986693744	0.000599082	0.006538935	--	-	-	-	-	-	-	-	-	--
Unigene0043096	62	67	52	94	73	823	1003	499	438	744	4.16	3.94	3.14	4.46	3.82	35.96	33.56	28.33	22.09	34.63	3.904	30.914	2.98523538	4.89E-40	3.40E-37	jmjd6	XP_045136927.1 bifunctional arginine demethylase and lysyl-hydroxylase JMJD6-like [Portunus trituberculatus]	-	-	-	-	GO:0005575//cellular_component;GO:0005622//intracellular anatomical structure;GO:0005634//nucleus;GO:0005654//nucleoplasm;GO:0005730//nucleolus;GO:0005737//cytoplasm;GO:0005829//cytosol;GO:0005886//plasma membrane;GO:0005887//integral component of plasma membrane;GO:0016020//membrane;GO:0016021//integral component of membrane;GO:0031224//intrinsic component of membrane;GO:0031226//intrinsic compo…	GO:0001786//phosphatidylserine binding;GO:0003674//molecular_function;GO:0003676//nucleic acid binding;GO:0003723//RNA binding;GO:0003727//single-stranded RNA binding;GO:0003824//catalytic activity;GO:0005488//binding;GO:0005506//iron ion binding;GO:0005515//protein binding;GO:0005543//phospholipid binding;GO:0008168//methyltransferase activity;GO:0008176//tRNA (guanine-N7-)-methyltransferase act…	GO:0001525//angiogenesis;GO:0001568//blood vessel development;GO:0001654//eye development;GO:0001655//urogenital system development;GO:0001775//cell activation;GO:0001822//kidney development;GO:0001932//regulation of protein phosphorylation;GO:0001933//negative regulation of protein phosphorylation;GO:0001944//vasculature development;GO:0002040//sprouting angiogenesis;GO:0002262//myeloid cell hom…	--
Unigene0001450	0	3	0	3	0	6	20	8	9	15	0	0.31	0	0.25	0	0.46	1.17	0.79	0.79	1.22	0.112	0.886	2.983807966	0.004368866	0.034815527	--	-	-	-	-	-	GO:0016020//membrane	-	GO:0009306//protein secretion	--
Unigene0041266	49	46	112	40	41	614	514	385	982	374	5.69	4.68	11.67	3.28	3.71	46.37	29.73	37.78	85.6	30.09	5.806	45.914	2.983317647	2.20E-10	9.52E-09	--	-	-	-	-	-	-	-	-	--
Unigene0040525	4	2	2	6	16	157	101	24	5	22	1.27	0.56	0.57	1.35	3.97	32.49	16.01	6.45	1.19	4.85	1.544	12.198	2.981899963	0.001437989	0.013700368	--	-	-	-	-	-	GO:0031083//BLOC-1 complex	-	-	--
Unigene0028503	1	3	1	1	0	4	12	26	10	5	0.17	0.44	0.15	0.12	0	0.43	0.99	3.66	1.25	0.58	0.176	1.382	2.973110282	0.006431207	0.048037764	PPAF3	AUW64506.2 serine protease 5 [Scylla paramamosain]	Organismal Systems	Immune system	ko04624//Toll and Imd signaling pathway	K20672	GO:0000775//chromosome, centromeric region;GO:0005575//cellular_component;GO:0005622//intracellular anatomical structure;GO:0005634//nucleus;GO:0005681//spliceosomal complex;GO:0005684//U2-type spliceosomal complex;GO:0005694//chromosome;GO:0005737//cytoplasm;GO:0032991//protein-containing complex;GO:0034507//chromosome, centromeric outer repeat region;GO:0043226//organelle;GO:0043227//membrane-b…	GO:0003674//molecular_function;GO:0003676//nucleic acid binding;GO:0003677//DNA binding;GO:0003723//RNA binding;GO:0004252//serine-type endopeptidase activity;GO:0005488//binding;GO:0097159//organic cyclic compound binding;GO:1901363//heterocyclic compound binding	GO:0000375//RNA splicing, via transesterification reactions;GO:0000377//RNA splicing, via transesterification reactions with bulged adenosine as nucleophile;GO:0000398//mRNA splicing, via spliceosome;GO:0006139//nucleobase-containing compound metabolic process;GO:0006259//DNA metabolic process;GO:0006260//DNA replication;GO:0006325//chromatin organization;GO:0006355//regulation of transcription, …	--
Unigene0010225	11	8	1	1	7	84	33	41	73	52	2.37	1.51	0.19	0.15	1.18	11.78	3.54	7.47	11.81	7.77	1.08	8.474	2.972011816	1.67E-05	0.000287544	--	-	-	-	-	-	-	-	-	--
Unigene0027491	1	2	0	0	2	15	13	8	6	9	0.31	0.54	0	0	0.48	3.02	2	2.09	1.39	1.93	0.266	2.086	2.971241007	0.004175107	0.033444213	--	-	-	-	-	-	-	-	-	--
Unigene0045385	38	30	49	38	25	382	520	214	497	215	5.55	3.84	6.43	3.93	2.85	36.32	37.87	26.44	54.55	21.78	4.52	35.392	2.969028613	1.10E-15	1.05E-13	--	-	-	-	-	-	-	-	-	--
Unigene0035004	32	29	51	17	56	762	527	167	311	157	9.18	7.29	13.14	3.45	12.54	142.31	75.38	40.53	67.04	31.24	9.12	71.3	2.966796347	3.84E-08	1.14E-06	--	-	-	-	-	-	-	-	-	--
Unigene0026835	5	5	5	10	8	41	158	107	22	0	0.5	0.43	0.45	0.7	0.62	2.65	7.81	8.97	1.64	0	0.54	4.214	2.964159002	0.001779989	0.016436188	--	ACY66531.1 hypothetical protein [Scylla paramamosain]	-	-	-	-	GO:0016021//integral component of membrane	-	-	--
Unigene0038278	3	2	0	1	1	8	5	19	14	20	0.44	0.26	0	0.1	0.11	0.76	0.37	2.36	1.54	2.04	0.182	1.414	2.957771765	0.00296346	0.025176419	--	XP_045115981.1 uncharacterized protein LOC123507273 [Portunus trituberculatus]	-	-	-	-	-	-	-	--
Unigene0042431	29	55	38	25	44	532	375	397	117	449	7.19	11.95	8.46	4.39	8.52	85.87	46.36	83.27	21.8	77.2	8.102	62.9	2.956710027	7.87E-11	3.67E-09	--	-	-	-	-	-	-	-	-	--
Unigene0016065	47	80	68	48	55	858	718	500	187	716	6.72	10.03	8.74	4.86	6.14	79.88	51.2	60.49	20.1	71.01	7.298	56.536	2.953596758	2.55E-13	1.77E-11	--	-	-	-	-	-	-	-	-	--
Unigene0037337	3	14	17	5	11	154	14	209	31	33	0.11	0.45	0.55	0.13	0.31	3.64	0.25	6.41	0.85	0.83	0.31	2.396	2.950287788	0.000592592	0.006480397	--	XP_045122242.1 uncharacterized protein LOC123510865 [Portunus trituberculatus]	-	-	-	-	GO:0005575//cellular_component;GO:0005576//extracellular region;GO:0005622//intracellular anatomical structure;GO:0005634//nucleus;GO:0005654//nucleoplasm;GO:0005737//cytoplasm;GO:0005856//cytoskeleton;GO:0005886//plasma membrane;GO:0005887//integral component of plasma membrane;GO:0009986//cell surface;GO:0015629//actin cytoskeleton;GO:0016020//membrane;GO:0016021//integral component of membrane…	GO:0003674//molecular_function;GO:0003824//catalytic activity;GO:0004175//endopeptidase activity;GO:0004252//serine-type endopeptidase activity;GO:0005044//scavenger receptor activity;GO:0005515//protein binding;GO:0008233//peptidase activity;GO:0008236//serine-type peptidase activity;GO:0016787//hydrolase activity;GO:0017171//serine hydrolase activity;GO:0038024//cargo receptor activity;GO:01400…	GO:0000003//reproduction;GO:0001990//regulation of systemic arterial blood pressure by hormone;GO:0003008//system process;GO:0003013//circulatory system process;GO:0003044//regulation of systemic arterial blood pressure mediated by a chemical signal;GO:0003050//regulation of systemic arterial blood pressure by atrial natriuretic peptide;GO:0003073//regulation of systemic arterial blood pressure;G…	--
Unigene0026798	1	0	2	1	2	17	12	13	11	5	0.11	0	0.19	0.08	0.17	1.18	0.64	1.17	0.88	0.37	0.11	0.848	2.946560741	0.002579598	0.022441644	--	-	-	-	-	-	-	-	-	--
Unigene0045811	2	16	3	0	2	93	3	67	35	16	0.25	1.72	0.33	0	0.19	7.44	0.18	6.96	3.23	1.36	0.498	3.834	2.94463269	0.005578188	0.042776595	--	-	-	-	-	-	-	-	-	--
Unigene0046338	9	17	9	18	10	239	88	100	94	71	0.4	0.66	0.36	0.57	0.35	6.92	1.95	3.76	3.14	2.19	0.468	3.592	2.940206915	1.96E-09	7.30E-08	Fnip2	XP_045107449.1 uncharacterized protein LOC123502264 [Portunus trituberculatus]	Environmental Information Processing	Signal transduction	ko04150//mTOR signaling pathway	K20401	-	-	-	--
Unigene0044625	1	4	4	3	3	20	41	46	23	10	0.13	0.44	0.45	0.27	0.29	1.63	2.56	4.88	2.17	0.87	0.316	2.422	2.938202402	8.07E-05	0.001148968	Act87E	XP_045108315.1 actin-85C-like [Portunus trituberculatus]	Cellular Processes;Environmental Information Processing;Organismal Systems	Transport and catabolism;Signal transduction;Sensory system	ko04145//Phagosome;ko04391//Hippo signaling pathway - fly;ko04745//Phototransduction - fly	K05692;K05692;K05692	GO:0005575//cellular_component;GO:0005622//intracellular anatomical structure;GO:0005856//cytoskeleton;GO:0005884//actin filament;GO:0015629//actin cytoskeleton;GO:0043226//organelle;GO:0043228//non-membrane-bounded organelle;GO:0043229//intracellular organelle;GO:0043232//intracellular non-membrane-bounded organelle;GO:0099080//supramolecular complex;GO:0099081//supramolecular polymer;GO:0099512…	GO:0003674//molecular_function;GO:0005198//structural molecule activity;GO:0005200//structural constituent of cytoskeleton	GO:0006996//organelle organization;GO:0007010//cytoskeleton organization;GO:0007015//actin filament organization;GO:0008150//biological_process;GO:0009653//anatomical structure morphogenesis;GO:0009987//cellular process;GO:0010927//cellular component assembly involved in morphogenesis;GO:0014866//skeletal myofibril assembly;GO:0016043//cellular component organization;GO:0022607//cellular componen…	--
Unigene0006172	8	7	3	9	3	28	164	22	23	83	0.45	0.34	0.15	0.35	0.13	1.02	4.56	1.04	0.96	3.21	0.284	2.158	2.92573203	1.25E-05	0.000221477	Chst12	KAG0722417.1 Carbohydrate sulfotransferase 14 [Chionoecetes opilio]	Metabolism	Glycan biosynthesis and metabolism	ko00532//Glycosaminoglycan biosynthesis - chondroitin sulfate / dermatan sulfate	K01017	GO:0016021//integral component of membrane	GO:0008146//sulfotransferase activity	-	--
Unigene0017204	2	1	2	1	5	24	27	23	17	13	0.57	0.25	0.51	0.2	1.12	4.47	3.85	5.57	3.66	2.58	0.53	4.026	2.925282907	0.000111164	0.001515197	--	XP_045126627.1 WD repeat-containing protein 3-like isoform X1 [Portunus trituberculatus]	Genetic Information Processing	Translation	ko03008//Ribosome biogenesis in eukaryotes	K14556	GO:0005575//cellular_component;GO:0005622//intracellular anatomical structure;GO:0005634//nucleus;GO:0005635//nuclear envelope;GO:0005654//nucleoplasm;GO:0005730//nucleolus;GO:0012505//endomembrane system;GO:0016020//membrane;GO:0030684//preribosome;GO:0030686//90S preribosome;GO:0031090//organelle membrane;GO:0031965//nuclear membrane;GO:0031967//organelle envelope;GO:0031974//membrane-enclosed …	GO:0003674//molecular_function;GO:0003676//nucleic acid binding;GO:0003723//RNA binding;GO:0005488//binding;GO:0005515//protein binding;GO:0030515//snoRNA binding;GO:0097159//organic cyclic compound binding;GO:1901363//heterocyclic compound binding	GO:0000447//endonucleolytic cleavage in ITS1 to separate SSU-rRNA from 5.8S rRNA and LSU-rRNA from tricistronic rRNA transcript (SSU-rRNA, 5.8S rRNA, LSU-rRNA);GO:0000460//maturation of 5.8S rRNA;GO:0000462//maturation of SSU-rRNA from tricistronic rRNA transcript (SSU-rRNA, 5.8S rRNA, LSU-rRNA);GO:0000466//maturation of 5.8S rRNA from tricistronic rRNA transcript (SSU-rRNA, 5.8S rRNA, LSU-rRNA);…	--
Unigene0038021	1	2	0	4	6	38	35	14	11	22	0.18	0.31	0	0.51	0.84	4.42	3.12	2.12	1.48	2.72	0.368	2.772	2.913149586	0.000218559	0.002734718	pusl1	XP_045120508.1 tRNA pseudouridine synthase-like 1 [Portunus trituberculatus]	-	-	-	-	GO:0005575//cellular_component;GO:0005622//intracellular anatomical structure;GO:0043226//organelle;GO:0043227//membrane-bounded organelle;GO:0043229//intracellular organelle;GO:0043231//intracellular membrane-bounded organelle	GO:0003674//molecular_function;GO:0003676//nucleic acid binding;GO:0003723//RNA binding;GO:0003824//catalytic activity;GO:0005488//binding;GO:0009982//pseudouridine synthase activity;GO:0016853//isomerase activity;GO:0016866//intramolecular transferase activity;GO:0097159//organic cyclic compound binding;GO:1901363//heterocyclic compound binding	GO:0001522//pseudouridine synthesis;GO:0006139//nucleobase-containing compound metabolic process;GO:0006396//RNA processing;GO:0006399//tRNA metabolic process;GO:0006400//tRNA modification;GO:0006725//cellular aromatic compound metabolic process;GO:0006807//nitrogen compound metabolic process;GO:0008033//tRNA processing;GO:0008150//biological_process;GO:0008152//metabolic process;GO:0009451//RNA …	--
Unigene0045643	27	42	10	57	20	255	425	237	181	363	1.68	2.3	0.56	2.51	0.97	10.35	13.21	12.5	8.48	15.7	1.604	12.048	2.909047628	6.55E-15	5.62E-13	Hdhd5	XP_045125326.1 haloacid dehalogenase-like hydrolase domain-containing 5 [Portunus trituberculatus]	-	-	-	-	GO:0005575//cellular_component;GO:0005622//intracellular anatomical structure;GO:0005737//cytoplasm;GO:0005739//mitochondrion;GO:0016020//membrane;GO:0043226//organelle;GO:0043227//membrane-bounded organelle;GO:0043229//intracellular organelle;GO:0043231//intracellular membrane-bounded organelle	GO:0003674//molecular_function;GO:0003824//catalytic activity;GO:0008808//cardiolipin synthase activity;GO:0008967//phosphoglycolate phosphatase activity;GO:0016740//transferase activity;GO:0016772//transferase activity, transferring phosphorus-containing groups;GO:0016780//phosphotransferase activity, for other substituted phosphate groups;GO:0016787//hydrolase activity;GO:0030572//phosphatidylt…	GO:0006629//lipid metabolic process;GO:0006644//phospholipid metabolic process;GO:0006650//glycerophospholipid metabolic process;GO:0006655//phosphatidylglycerol biosynthetic process;GO:0006793//phosphorus metabolic process;GO:0006796//phosphate-containing compound metabolic process;GO:0006996//organelle organization;GO:0007005//mitochondrion organization;GO:0007006//mitochondrial membrane organi…	--
Unigene0002347	2	2	10	9	2	50	26	55	19	69	0.08	0.07	0.36	0.25	0.06	1.3	0.52	1.85	0.57	1.91	0.164	1.23	2.906890596	3.02E-05	0.000482274	--	XP_043222567.1 uncharacterized protein LOC122381883 [Amphibalanus amphitrite]	-	-	-	-	-	-	-	--
Unigene0002264	111	83	132	157	148	1207	1190	1260	1044	1038	4.89	3.2	5.22	4.89	5.08	34.58	26.11	46.91	34.52	31.68	4.656	34.76	2.900265119	1.63E-26	4.48E-24	Stoml2	XP_045107948.1 stomatin-like protein 2, mitochondrial [Portunus trituberculatus]	-	-	-	-	GO:0001772//immunological synapse;GO:0005575//cellular_component;GO:0005622//intracellular anatomical structure;GO:0005634//nucleus;GO:0005737//cytoplasm;GO:0005739//mitochondrion;GO:0005740//mitochondrial envelope;GO:0005743//mitochondrial inner membrane;GO:0005758//mitochondrial intermembrane space;GO:0005856//cytoskeleton;GO:0005886//plasma membrane;GO:0008180//COP9 signalosome;GO:0015629//act…	GO:0003674//molecular_function;GO:0005102//signaling receptor binding;GO:0005488//binding;GO:0005515//protein binding;GO:0005543//phospholipid binding;GO:0008289//lipid binding;GO:0019899//enzyme binding;GO:0043167//ion binding;GO:0043168//anion binding;GO:0051020//GTPase binding;GO:1901611//phosphatidylglycerol binding;GO:1901612//cardiolipin binding	GO:0001775//cell activation;GO:0001816//cytokine production;GO:0002253//activation of immune response;GO:0002376//immune system process;GO:0002429//immune response-activating cell surface receptor signaling pathway;GO:0002682//regulation of immune system process;GO:0002684//positive regulation of immune system process;GO:0002757//immune response-activating signal transduction;GO:0002764//immune r…	--
Unigene0010762	2	3	11	2	3	35	4	54	31	61	0.58	0.76	2.84	0.41	0.67	6.55	0.57	13.13	6.7	12.16	1.052	7.822	2.894402831	0.00094868	0.009659328	--	-	-	-	-	-	-	GO:0004649//poly(ADP-ribose) glycohydrolase activity	GO:0005975//carbohydrate metabolic process	--
Unigene0018632	1	5	3	10	5	56	50	31	26	52	0.05	0.21	0.13	0.34	0.19	1.74	1.19	1.25	0.93	1.73	0.184	1.368	2.894290559	1.35E-07	3.62E-06	TY3B-G	VZI29827.1 unnamed protein product [Spirometra erinaceieuropaei]	-	-	-	-	-	GO:0003964//RNA-directed DNA polymerase activity	GO:0000373//Group II intron splicing;GO:0015074//DNA integration	--
Unigene0039481	2	4	5	1	2	20	62	18	5	41	0.23	0.41	0.52	0.08	0.18	1.5	3.57	1.76	0.43	3.28	0.284	2.108	2.891912032	0.000329467	0.00390986	--	-	-	-	-	-	-	-	-	--
Unigene0022623	2	2	2	0	0	18	10	8	17	7	0.46	0.41	0.42	0	0	2.72	1.16	1.57	2.97	1.13	0.258	1.91	2.888129667	0.003046709	0.025752358	--	-	-	-	-	-	-	-	-	--
Unigene0028397	191	154	170	286	160	2500	2028	1415	1231	1723	8.49	6	6.79	8.99	5.55	72.35	44.95	53.21	41.12	53.12	7.164	52.95	2.885793442	5.58E-34	2.42E-31	COPB1	XP_045131057.1 coatomer subunit beta-like [Portunus trituberculatus]	-	-	-	-	GO:0000139//Golgi membrane;GO:0005575//cellular_component;GO:0005622//intracellular anatomical structure;GO:0005737//cytoplasm;GO:0005783//endoplasmic reticulum;GO:0005789//endoplasmic reticulum membrane;GO:0005793//endoplasmic reticulum-Golgi intermediate compartment;GO:0005794//Golgi apparatus;GO:0005798//Golgi-associated vesicle;GO:0005829//cytosol;GO:0005886//plasma membrane;GO:0012505//endom…	GO:0003674//molecular_function;GO:0005198//structural molecule activity;GO:0005515//protein binding	GO:0000902//cell morphogenesis;GO:0001775//cell activation;GO:0002252//immune effector process;GO:0002263//cell activation involved in immune response;GO:0002274//myeloid leukocyte activation;GO:0002275//myeloid cell activation involved in immune response;GO:0002283//neutrophil activation involved in immune response;GO:0002366//leukocyte activation involved in immune response;GO:0002376//immune s…	--
Unigene0026334	8	9	2	17	3	24	28	128	17	122	0.59	0.58	0.13	0.88	0.17	1.15	1.03	7.96	0.94	6.22	0.47	3.46	2.880039376	0.000357948	0.00420354	--	XP_045115341.1 chimeric ERCC6-PGBD3 protein-like isoform X1 [Portunus trituberculatus]	-	-	-	-	GO:0005743//mitochondrial inner membrane	GO:0008137//NADH dehydrogenase (ubiquinone) activity	GO:0006120//mitochondrial electron transport, NADH to ubiquinone	--
Unigene0001443	115	96	157	93	82	427	1790	721	1082	1202	9.69	7.09	11.88	5.54	5.39	23.42	75.18	51.38	68.49	70.22	7.918	57.738	2.866313162	1.34E-13	9.67E-12	--	-	-	-	-	-	-	GO:0046914//transition metal ion binding	-	--
Unigene0029351	0	2	0	3	2	5	16	12	14	11	0	0.31	0	0.37	0.27	0.57	1.4	1.78	1.84	1.33	0.19	1.384	2.864772619	0.004161589	0.033342337	--	XP_027039628.1 uncharacterized protein LOC113667950 [Pocillopora damicornis]	-	-	-	-	-	-	-	--
Unigene0000631	27	20	22	24	47	279	363	203	135	319	1.99	1.29	1.45	1.25	2.7	13.35	13.3	12.62	7.46	16.26	1.736	12.598	2.859355863	1.86E-14	1.50E-12	Gosr2	XP_045130443.1 Golgi SNAP receptor complex member 2-like [Portunus trituberculatus]	Genetic Information Processing	Folding, sorting and degradation	ko04130//SNARE interactions in vesicular transport	K08496	GO:0000139//Golgi membrane;GO:0005575//cellular_component;GO:0005622//intracellular anatomical structure;GO:0005737//cytoplasm;GO:0005768//endosome;GO:0005770//late endosome;GO:0005783//endoplasmic reticulum;GO:0005789//endoplasmic reticulum membrane;GO:0005793//endoplasmic reticulum-Golgi intermediate compartment;GO:0005794//Golgi apparatus;GO:0005798//Golgi-associated vesicle;GO:0005829//cytoso…	GO:0000149//SNARE binding;GO:0003674//molecular_function;GO:0005484//SNAP receptor activity;GO:0005488//binding;GO:0005515//protein binding	GO:0006605//protein targeting;GO:0006623//protein targeting to vacuole;GO:0006810//transport;GO:0006886//intracellular protein transport;GO:0006888//endoplasmic reticulum to Golgi vesicle-mediated transport;GO:0006890//retrograde vesicle-mediated transport, Golgi to endoplasmic reticulum;GO:0006891//intra-Golgi vesicle-mediated transport;GO:0006892//post-Golgi vesicle-mediated transport;GO:000689…	--
Unigene0046962	2	8	8	6	12	45	26	108	55	58	0.21	0.75	0.77	0.45	1	3.13	1.39	9.77	4.42	4.3	0.636	4.602	2.855162313	2.12E-05	0.000354831	--	XP_045102117.1 perilipin-2-like [Portunus trituberculatus]	-	-	-	-	GO:0005575//cellular_component;GO:0005576//extracellular region;GO:0005622//intracellular anatomical structure;GO:0005634//nucleus;GO:0005737//cytoplasm;GO:0005783//endoplasmic reticulum;GO:0005811//lipid droplet;GO:0005829//cytosol;GO:0005886//plasma membrane;GO:0012505//endomembrane system;GO:0016020//membrane;GO:0043226//organelle;GO:0043227//membrane-bounded organelle;GO:0043228//non-membrane…	-	GO:0006810//transport;GO:0006811//ion transport;GO:0006820//anion transport;GO:0006869//lipid transport;GO:0008150//biological_process;GO:0010033//response to organic substance;GO:0010876//lipid localization;GO:0014070//response to organic cyclic compound;GO:0015711//organic anion transport;GO:0015718//monocarboxylic acid transport;GO:0015849//organic acid transport;GO:0015908//fatty acid transpo…	--
Unigene0044774	7	3	5	12	17	106	102	47	38	106	0.31	0.12	0.2	0.38	0.59	3.05	2.25	1.76	1.26	3.25	0.32	2.314	2.854245054	6.54E-08	1.87E-06	DGCR8	XP_045106895.1 microprocessor complex subunit DGCR8-like isoform X1 [Portunus trituberculatus]	-	-	-	-	GO:0005575//cellular_component;GO:0005622//intracellular anatomical structure;GO:0005634//nucleus;GO:0005654//nucleoplasm;GO:0005730//nucleolus;GO:0005737//cytoplasm;GO:0014069//postsynaptic density;GO:0031974//membrane-enclosed lumen;GO:0031981//nuclear lumen;GO:0032279//asymmetric synapse;GO:0032991//protein-containing complex;GO:0043226//organelle;GO:0043227//membrane-bounded organelle;GO:0043…	GO:0003674//molecular_function;GO:0003676//nucleic acid binding;GO:0003723//RNA binding;GO:0003725//double-stranded RNA binding;GO:0003824//catalytic activity;GO:0004518//nuclease activity;GO:0004519//endonuclease activity;GO:0004521//endoribonuclease activity;GO:0004525//ribonuclease III activity;GO:0004540//ribonuclease activity;GO:0005488//binding;GO:0005515//protein binding;GO:0016787//hydrol…	GO:0000003//reproduction;GO:0001709//cell fate determination;GO:0003006//developmental process involved in reproduction;GO:0006139//nucleobase-containing compound metabolic process;GO:0006396//RNA processing;GO:0006725//cellular aromatic compound metabolic process;GO:0006807//nitrogen compound metabolic process;GO:0007275//multicellular organism development;GO:0007276//gamete generation;GO:000728…	--
Unigene0031142	5	3	2	17	9	49	2	112	29	80	1	0.53	0.36	2.4	1.4	6.38	0.2	18.94	4.36	11.09	1.138	8.194	2.848067335	0.002001017	0.018170995	--	KAG0727135.1 NPC intracellular cholesterol transporter 2 [Chionoecetes opilio]	Cellular Processes	Transport and catabolism	ko04142//Lysosome	K13443	-	-	-	--
Unigene0003243	2	0	0	7	2	31	23	9	9	22	0.38	0	0	0.94	0.3	3.83	2.18	1.45	1.28	2.9	0.324	2.328	2.84502534	0.00152743	0.014436939	--	-	-	-	-	-	GO:0005744//TIM23 mitochondrial import inner membrane translocase complex	-	GO:0030150//protein import into mitochondrial matrix	--
Unigene0037840	2	0	3	3	1	11	40	12	7	17	0.76	0	1.03	0.81	0.3	2.73	7.61	3.88	2.01	4.5	0.58	4.146	2.837595311	0.001061484	0.010603128	--	-	-	-	-	-	-	-	-	--
Unigene0000075	21	12	12	19	9	204	155	62	61	199	1.41	0.7	0.72	0.9	0.47	8.9	5.18	3.51	3.07	9.25	0.84	5.982	2.832166677	1.50E-09	5.67E-08	--	-	-	-	-	-	-	-	-	--
Unigene0007936	31	50	25	34	21	324	395	297	235	209	2.99	4.22	2.16	2.32	1.58	20.3	18.96	24.19	17	13.95	2.654	18.88	2.830618489	4.84E-18	6.28E-16	--	-	-	-	-	-	GO:0016021//integral component of membrane	-	GO:0006855//xenobiotic transmembrane transport	--
Unigene0027821	219	200	140	335	427	3147	2402	2351	2138	1302	7.21	5.77	4.14	7.8	10.97	67.43	39.42	65.46	52.88	29.72	7.178	50.982	2.828334142	3.95E-13	2.66E-11	--	XP_045122843.1 uncharacterized protein LOC123511218 isoform X1 [Portunus trituberculatus]	-	-	-	-	-	GO:0003674//molecular_function;GO:0003824//catalytic activity;GO:0004024//alcohol dehydrogenase activity, zinc-dependent;GO:0005488//binding;GO:0005515//protein binding;GO:0008270//zinc ion binding;GO:0016491//oxidoreductase activity;GO:0016655//oxidoreductase activity, acting on NAD(P)H, quinone or similar compound as acceptor	GO:0001666//response to hypoxia;GO:0006113//fermentation;GO:0006950//response to stress;GO:0008150//biological_process;GO:0008152//metabolic process;GO:0009628//response to abiotic stimulus;GO:0009636//response to toxic substance;GO:0009987//cellular process;GO:0010033//response to organic substance;GO:0036293//response to decreased oxygen levels;GO:0042221//response to chemical;GO:0045471//respo…	--
Unigene0034553	328	353	115	325	149	2960	1777	2860	1428	2022	6.16	5.81	1.94	4.31	2.18	36.15	16.62	45.39	20.13	26.31	4.08	28.92	2.825426495	1.91E-11	9.91E-10	SLC6A9	XP_045117925.1 sodium- and chloride-dependent glycine transporter 1-like isoform X3 [Portunus trituberculatus]	-	-	-	-	GO:0016021//integral component of membrane	-	-	--
Unigene0028607	7	20	10	12	8	81	121	84	122	96	0.52	1.3	0.66	0.63	0.46	3.9	4.46	5.25	6.77	4.92	0.714	5.06	2.825141406	2.10E-12	1.28E-10	--	XP_045131559.1 uncharacterized protein LOC123516349 isoform X1 [Portunus trituberculatus]	-	-	-	-	GO:0005575//cellular_component;GO:0005622//intracellular anatomical structure;GO:0005840//ribosome;GO:0005856//cytoskeleton;GO:0015630//microtubule cytoskeleton;GO:0043226//organelle;GO:0043228//non-membrane-bounded organelle;GO:0043229//intracellular organelle;GO:0043232//intracellular non-membrane-bounded organelle	GO:0000981//DNA-binding transcription factor activity, RNA polymerase II-specific;GO:0003674//molecular_function;GO:0003676//nucleic acid binding;GO:0003677//DNA binding;GO:0003700//DNA-binding transcription factor activity;GO:0004803//transposase activity;GO:0005488//binding;GO:0043167//ion binding;GO:0043169//cation binding;GO:0046872//metal ion binding;GO:0097159//organic cyclic compound bindi…	GO:0006313//transposition, DNA-mediated;GO:0006355//regulation of transcription, DNA-templated;GO:0006357//regulation of transcription by RNA polymerase II;GO:0008150//biological_process;GO:0009889//regulation of biosynthetic process;GO:0010468//regulation of gene expression;GO:0010556//regulation of macromolecule biosynthetic process;GO:0019219//regulation of nucleobase-containing compound metab…	THAP
Unigene0042313	207	216	245	288	218	2824	2688	1523	1533	1968	10.28	9.4	10.93	10.11	8.45	91.26	66.53	63.95	57.18	67.75	9.834	69.334	2.817712734	3.48E-44	3.72E-41	COPG2	XP_045111810.1 coatomer subunit gamma-2-like [Portunus trituberculatus]	-	-	-	-	GO:0000139//Golgi membrane;GO:0005575//cellular_component;GO:0005622//intracellular anatomical structure;GO:0005737//cytoplasm;GO:0005768//endosome;GO:0005783//endoplasmic reticulum;GO:0005793//endoplasmic reticulum-Golgi intermediate compartment;GO:0005794//Golgi apparatus;GO:0005798//Golgi-associated vesicle;GO:0005801//cis-Golgi network;GO:0012505//endomembrane system;GO:0012506//vesicle membr…	GO:0003674//molecular_function;GO:0005198//structural molecule activity;GO:0005515//protein binding	GO:0000003//reproduction;GO:0000278//mitotic cell cycle;GO:0000280//nuclear division;GO:0000281//mitotic cytokinesis;GO:0000910//cytokinesis;GO:0001763//morphogenesis of a branching structure;GO:0002009//morphogenesis of an epithelium;GO:0002164//larval development;GO:0002165//instar larval or pupal development;GO:0002168//instar larval development;GO:0002790//peptide secretion;GO:0006810//transp…	--
Unigene0037208	14	21	12	24	17	154	144	121	159	178	1.26	1.66	0.97	1.53	1.2	9.04	6.47	9.23	10.77	11.13	1.324	9.328	2.816664666	5.06E-18	6.49E-16	shv	XP_045123335.1 dnaJ homolog shv-like [Portunus trituberculatus]	Genetic Information Processing	Folding, sorting and degradation	ko04141//Protein processing in endoplasmic reticulum	K09517	GO:0005575//cellular_component;GO:0005576//extracellular region;GO:0005615//extracellular space;GO:0005622//intracellular anatomical structure;GO:0005634//nucleus;GO:0005737//cytoplasm;GO:0005783//endoplasmic reticulum;GO:0005788//endoplasmic reticulum lumen;GO:0005886//plasma membrane;GO:0012505//endomembrane system;GO:0016020//membrane;GO:0031594//neuromuscular junction;GO:0031974//membrane-enc…	GO:0003674//molecular_function;GO:0005102//signaling receptor binding;GO:0005178//integrin binding;GO:0005488//binding;GO:0005515//protein binding;GO:0044877//protein-containing complex binding;GO:0050839//cell adhesion molecule binding;GO:0051082//unfolded protein binding	GO:0002682//regulation of immune system process;GO:0002684//positive regulation of immune system process;GO:0006139//nucleobase-containing compound metabolic process;GO:0006457//protein folding;GO:0006725//cellular aromatic compound metabolic process;GO:0006807//nitrogen compound metabolic process;GO:0006950//response to stress;GO:0006986//response to unfolded protein;GO:0007154//cell communicati…	--
Unigene0046788	98	92	104	163	120	1228	1419	947	619	884	6.45	5.31	6.15	7.59	6.16	52.6	46.55	52.71	30.61	40.34	6.332	44.562	2.815080824	1.65E-31	6.14E-29	Scfd1	XP_045129903.1 sec1 family domain-containing protein 1-like [Portunus trituberculatus]	-	-	-	-	GO:0000139//Golgi membrane;GO:0005575//cellular_component;GO:0005622//intracellular anatomical structure;GO:0005737//cytoplasm;GO:0005783//endoplasmic reticulum;GO:0005789//endoplasmic reticulum membrane;GO:0005794//Golgi apparatus;GO:0005795//Golgi stack;GO:0005798//Golgi-associated vesicle;GO:0005801//cis-Golgi network;GO:0005829//cytosol;GO:0005886//plasma membrane;GO:0012505//endomembrane sys…	GO:0000149//SNARE binding;GO:0003674//molecular_function;GO:0005488//binding;GO:0005515//protein binding;GO:0019905//syntaxin binding;GO:0047485//protein N-terminus binding	GO:0000902//cell morphogenesis;GO:0001666//response to hypoxia;GO:0003002//regionalization;GO:0006810//transport;GO:0006886//intracellular protein transport;GO:0006887//exocytosis;GO:0006888//endoplasmic reticulum to Golgi vesicle-mediated transport;GO:0006890//retrograde vesicle-mediated transport, Golgi to endoplasmic reticulum;GO:0006892//post-Golgi vesicle-mediated transport;GO:0006900//vesic…	--
Unigene0027157	0	7	4	5	6	25	17	81	35	10	0	1.12	0.66	0.65	0.86	2.98	1.55	12.53	4.81	1.27	0.658	4.628	2.814229375	0.001338538	0.012867634	--	-	-	-	-	-	-	GO:0046872//metal ion binding	-	--
Unigene0041057	27	44	17	57	36	512	197	446	175	155	2.13	3.04	1.21	3.18	2.22	26.31	7.75	29.78	10.38	8.49	2.356	16.542	2.811722229	2.81E-08	8.54E-07	--	-	-	-	-	-	-	-	-	--
Unigene0008806	1	5	0	2	1	16	21	16	9	17	0.13	0.56	0	0.18	0.1	1.34	1.35	1.74	0.87	1.51	0.194	1.362	2.811598146	0.000816149	0.008492587	--	-	-	-	-	-	-	-	-	--
Unigene0039045	326	422	535	634	542	4275	5835	2728	4184	4665	15.33	17.39	22.6	21.09	19.89	130.85	136.79	108.5	147.83	152.11	19.26	135.216	2.811586266	1.03E-44	1.12E-41	Canx	ANN46488.1 calnexin [Eriocheir sinensis]	Genetic Information Processing;Cellular Processes	Folding, sorting and degradation;Transport and catabolism	ko04141//Protein processing in endoplasmic reticulum;ko04145//Phagosome	K08054;K08054	GO:0000322//storage vacuole;GO:0000323//lytic vacuole;GO:0000324//fungal-type vacuole;GO:0005575//cellular_component;GO:0005622//intracellular anatomical structure;GO:0005737//cytoplasm;GO:0005773//vacuole;GO:0005783//endoplasmic reticulum;GO:0005789//endoplasmic reticulum membrane;GO:0012505//endomembrane system;GO:0016020//membrane;GO:0016021//integral component of membrane;GO:0030176//integral…	GO:0003674//molecular_function;GO:0005488//binding;GO:0005509//calcium ion binding;GO:0005515//protein binding;GO:0030246//carbohydrate binding;GO:0043167//ion binding;GO:0043169//cation binding;GO:0046872//metal ion binding;GO:0051082//unfolded protein binding	GO:0006457//protein folding;GO:0006508//proteolysis;GO:0006511//ubiquitin-dependent protein catabolic process;GO:0006807//nitrogen compound metabolic process;GO:0006915//apoptotic process;GO:0006950//response to stress;GO:0006986//response to unfolded protein;GO:0007154//cell communication;GO:0007165//signal transduction;GO:0007275//multicellular organism development;GO:0008150//biological_proces…	--
Unigene0036638	135	153	156	285	151	1720	2020	991	852	2173	1.21	1.2	1.25	1.8	1.05	10	9	7.49	5.72	13.46	1.302	9.134	2.810517341	4.10E-27	1.19E-24	MDN1	XP_045137299.1 midasin-like isoform X1 [Portunus trituberculatus]	Genetic Information Processing	Translation	ko03008//Ribosome biogenesis in eukaryotes	K14572	GO:0005575//cellular_component;GO:0005622//intracellular anatomical structure;GO:0005634//nucleus;GO:0005654//nucleoplasm;GO:0005730//nucleolus;GO:0005737//cytoplasm;GO:0005829//cytosol;GO:0005856//cytoskeleton;GO:0005887//integral component of plasma membrane;GO:0009360//DNA polymerase III complex;GO:0009379//Holliday junction helicase complex;GO:0009898//cytoplasmic side of plasma membrane;GO:0…	GO:0000166//nucleotide binding;GO:0003674//molecular_function;GO:0003676//nucleic acid binding;GO:0003677//DNA binding;GO:0003678//DNA helicase activity;GO:0003723//RNA binding;GO:0003724//RNA helicase activity;GO:0003824//catalytic activity;GO:0003887//DNA-directed DNA polymerase activity;GO:0003924//GTPase activity;GO:0005198//structural molecule activity;GO:0005319//lipid transporter activity;…	GO:0000027//ribosomal large subunit assembly;GO:0000910//cytokinesis;GO:0002949//tRNA threonylcarbamoyladenosine modification;GO:0006139//nucleobase-containing compound metabolic process;GO:0006260//DNA replication;GO:0006281//DNA repair;GO:0006310//DNA recombination;GO:0006355//regulation of transcription, DNA-templated;GO:0006364//rRNA processing;GO:0006396//RNA processing;GO:0006400//tRNA modi…	--
Unigene0016498	2	4	2	2	4	55	13	12	23	20	0.13	0.24	0.12	0.1	0.21	2.4	0.44	0.68	1.16	0.93	0.16	1.122	2.809928866	0.000337343	0.003987425	--	-	-	-	-	-	-	-	-	--
Unigene0027849	782	861	748	1018	844	9715	10841	5601	6840	5064	74.71	72.08	64.17	68.78	62.92	603.98	516.21	452.48	490.85	335.38	68.532	479.78	2.807523323	4.26E-35	1.99E-32	SUGT1	XP_045113406.1 protein SGT1 homolog isoform X1 [Portunus trituberculatus]	-	-	-	-	GO:0000151//ubiquitin ligase complex;GO:0000775//chromosome, centromeric region;GO:0000776//kinetochore;GO:0005575//cellular_component;GO:0005622//intracellular anatomical structure;GO:0005634//nucleus;GO:0005694//chromosome;GO:0005737//cytoplasm;GO:0005813//centrosome;GO:0005815//microtubule organizing center;GO:0005829//cytosol;GO:0005856//cytoskeleton;GO:0005886//plasma membrane;GO:0015630//mi…	GO:0003674//molecular_function;GO:0005488//binding;GO:0005515//protein binding;GO:0030674//protein-macromolecule adaptor activity;GO:0051087//chaperone binding;GO:0060090//molecular adaptor activity	GO:0000226//microtubule cytoskeleton organization;GO:0000278//mitotic cell cycle;GO:0006457//protein folding;GO:0006996//organelle organization;GO:0007010//cytoskeleton organization;GO:0007017//microtubule-based process;GO:0007049//cell cycle;GO:0007098//centrosome cycle;GO:0007154//cell communication;GO:0007163//establishment or maintenance of cell polarity;GO:0007165//signal transduction;GO:000…	--
Unigene0025695	8	2	11	10	4	176	105	2	28	28	0.66	0.15	0.82	0.59	0.26	9.5	4.34	0.14	1.74	1.61	0.496	3.466	2.804859629	0.001618254	0.015162806	tsg	KAG0725510.1 Protein twisted gastrulation [Chionoecetes opilio]	-	-	-	-	-	-	-	--
Unigene0001082	2	3	6	10	12	102	35	72	23	34	0.19	0.24	0.5	0.66	0.87	6.15	1.62	5.64	1.6	2.18	0.492	3.438	2.804839324	5.26E-05	0.000785383	--	KAG0730306.1 Muscle M-line assembly protein unc-89 [Chionoecetes opilio]	-	-	-	-	-	-	-	--
Unigene0038075	18	21	6	25	16	295	133	118	116	82	1.34	1.37	0.4	1.31	0.93	14.28	4.93	7.42	6.48	4.23	1.07	7.468	2.803111131	9.85E-09	3.25E-07	FNIP1	XP_045107449.1 uncharacterized protein LOC123502264 [Portunus trituberculatus]	Environmental Information Processing	Signal transduction	ko04150//mTOR signaling pathway	K20401	-	-	-	--
Unigene0045901	317	359	341	399	431	2474	5361	2414	3456	2734	37.7	37.41	36.41	33.55	39.99	191.44	317.72	242.73	308.68	225.37	37.012	257.188	2.796758329	1.42E-31	5.32E-29	zmat5	KAG0719206.1 Zinc finger matrin-type protein 5 [Chionoecetes opilio]	-	-	-	-	GO:0005575//cellular_component;GO:0005622//intracellular anatomical structure;GO:0005634//nucleus;GO:0005654//nucleoplasm;GO:0005681//spliceosomal complex;GO:0005689//U12-type spliceosomal complex;GO:0030532//small nuclear ribonucleoprotein complex;GO:0031974//membrane-enclosed lumen;GO:0031981//nuclear lumen;GO:0032991//protein-containing complex;GO:0043226//organelle;GO:0043227//membrane-bounde…	GO:0003674//molecular_function;GO:0003676//nucleic acid binding;GO:0003677//DNA binding;GO:0005488//binding;GO:0008270//zinc ion binding;GO:0043167//ion binding;GO:0043169//cation binding;GO:0046872//metal ion binding;GO:0046914//transition metal ion binding;GO:0097159//organic cyclic compound binding;GO:1901363//heterocyclic compound binding	GO:0000375//RNA splicing, via transesterification reactions;GO:0000377//RNA splicing, via transesterification reactions with bulged adenosine as nucleophile;GO:0000398//mRNA splicing, via spliceosome;GO:0006139//nucleobase-containing compound metabolic process;GO:0006396//RNA processing;GO:0006397//mRNA processing;GO:0006725//cellular aromatic compound metabolic process;GO:0006807//nitrogen compo…	--
Unigene0004561	8	22	17	11	18	230	156	110	56	121	1.51	3.63	2.87	1.46	2.64	28.17	14.63	17.51	7.92	15.79	2.422	16.804	2.794533921	4.07E-09	1.43E-07	--	-	-	-	-	-	-	-	-	--
Unigene0032153	11	7	7	5	16	89	107	69	51	95	1.52	0.85	0.87	0.49	1.73	8.01	7.37	8.07	5.3	9.11	1.092	7.572	2.793701555	4.96E-10	2.02E-08	--	-	-	-	-	-	-	-	-	--
Unigene0040422	0	1	4	2	3	17	25	6	31	7	0	0.26	1.07	0.42	0.7	3.31	3.72	1.52	6.96	1.45	0.49	3.392	2.791282516	0.00270948	0.023376276	--	-	-	-	-	-	-	-	-	--
Unigene0021071	19	9	19	11	16	178	122	150	88	107	3.83	1.59	3.44	1.57	2.51	23.32	12.24	25.54	13.31	14.93	2.588	17.868	2.787468637	2.34E-10	1.01E-08	--	-	-	-	-	-	-	-	-	--
Unigene0044468	61	162	265	94	171	1590	934	1304	1435	1059	4.99	11.62	19.47	5.44	10.92	84.67	38.09	90.24	88.21	60.08	10.488	72.258	2.784417733	1.67E-09	6.25E-08	Pebp4	XP_045117878.1 phosphatidylethanolamine-binding protein 1-like isoform X2 [Portunus trituberculatus]	-	-	-	-	GO:0005575//cellular_component	GO:0003674//molecular_function;GO:0008061//chitin binding	GO:0006032//chitin catabolic process;GO:0008150//biological_process	--
Unigene0010217	4	1	3	1	4	15	24	16	25	35	0.42	0.09	0.29	0.08	0.33	1.04	1.27	1.44	1.99	2.58	0.242	1.664	2.781576481	0.000113455	0.001540874	--	XP_045103406.1 AH receptor-interacting protein-like [Portunus trituberculatus]	-	-	-	-	-	GO:0003755//peptidyl-prolyl cis-trans isomerase activity;GO:0005515//protein binding;GO:0031267//small GTPase binding	GO:0003008//system process;GO:0007600//sensory perception;GO:0008150//biological_process;GO:0019233//sensory perception of pain;GO:0032501//multicellular organismal process;GO:0050877//nervous system process	--
Unigene0046268	2	13	4	3	6	37	40	10	98	53	0.75	4.26	1.34	0.79	1.75	9	7.46	3.16	27.53	13.74	1.778	12.178	2.775949989	0.000264345	0.003234729	--	-	-	-	-	-	-	GO:0016154//pyrimidine-nucleoside phosphorylase activity;GO:0016763//pentosyltransferase activity	GO:0006213//pyrimidine nucleoside metabolic process	--
Unigene0047044	7	2	0	1	0	16	23	10	30	16	1.13	0.28	0	0.11	0	1.69	1.86	1.37	3.65	1.8	0.304	2.074	2.770272665	0.002404888	0.021227637	--	-	-	-	-	-	-	-	-	--
Unigene0041532	83	58	82	115	100	995	838	503	870	515	6.09	3.73	5.4	5.97	5.72	47.49	30.64	31.2	47.94	26.19	5.382	36.692	2.769251249	2.54E-19	3.80E-17	kynB	XP_045111558.1 isatin hydrolase-like [Portunus trituberculatus]	-	-	-	-	-	GO:0004061//arylformamidase activity	GO:0019441//tryptophan catabolic process to kynurenine	--
Unigene0037605	53	70	33	119	67	636	868	494	409	485	3.9	4.52	2.18	6.19	3.85	30.47	31.85	30.75	22.62	24.75	4.128	28.088	2.766439025	3.74E-22	7.12E-20	LTA4H	XP_045106762.1 LOW QUALITY PROTEIN: leukotriene A-4 hydrolase-like [Portunus trituberculatus]	Metabolism;Metabolism	Global and overview maps;Lipid metabolism	ko01100//Metabolic pathways;ko00590//Arachidonic acid metabolism	K01254;K01254	GO:0000322//storage vacuole;GO:0000323//lytic vacuole;GO:0000324//fungal-type vacuole;GO:0000328//fungal-type vacuole lumen;GO:0005575//cellular_component;GO:0005576//extracellular region;GO:0005622//intracellular anatomical structure;GO:0005634//nucleus;GO:0005654//nucleoplasm;GO:0005737//cytoplasm;GO:0005768//endosome;GO:0005770//late endosome;GO:0005771//multivesicular body;GO:0005773//vacuole…	GO:0003674//molecular_function;GO:0003700//DNA-binding transcription factor activity;GO:0003735//structural constituent of ribosome;GO:0003824//catalytic activity;GO:0004177//aminopeptidase activity;GO:0004301//epoxide hydrolase activity;GO:0004463//leukotriene-A4 hydrolase activity;GO:0005198//structural molecule activity;GO:0005488//binding;GO:0008233//peptidase activity;GO:0008235//metalloexop…	GO:0001676//long-chain fatty acid metabolic process;GO:0001775//cell activation;GO:0002252//immune effector process;GO:0002263//cell activation involved in immune response;GO:0002274//myeloid leukocyte activation;GO:0002275//myeloid cell activation involved in immune response;GO:0002283//neutrophil activation involved in immune response;GO:0002366//leukocyte activation involved in immune response…	--
Unigene0029686	1	7	1	0	5	25	37	16	19	27	0.1	0.6	0.09	0	0.38	1.59	1.8	1.32	1.4	1.83	0.234	1.588	2.762630478	0.000267099	0.003259813	--	-	-	-	-	-	-	GO:0008375//acetylglucosaminyltransferase activity	GO:0042710//biofilm formation	--
Unigene0002462	2	1	1	5	0	3	32	16	9	16	0.53	0.23	0.24	0.94	0	0.52	4.25	3.6	1.8	2.95	0.388	2.624	2.757639162	0.004887147	0.038157303	--	-	-	-	-	-	-	-	-	--
Unigene0040669	3	12	6	3	2	54	84	43	26	29	0.15	0.52	0.26	0.1	0.08	1.72	2.05	1.78	0.96	0.99	0.222	1.5	2.756330919	5.18E-06	0.000101257	--	VDO11010.1 unnamed protein product [Brugia timori]	Genetic Information Processing	Folding, sorting and degradation	ko04141//Protein processing in endoplasmic reticulum	K14006	-	-	-	--
Unigene0042086	4	8	4	2	7	56	74	15	37	45	1.08	1.89	0.97	0.38	1.47	9.83	9.95	3.42	7.5	8.42	1.158	7.824	2.756271117	3.10E-06	6.39E-05	--	KAA3669829.1 uncharacterized protein DEA37_0001408, partial [Paragonimus westermani]	-	-	-	-	-	GO:0003964//RNA-directed DNA polymerase activity	GO:0000373//Group II intron splicing	--
Unigene0022494	4	2	3	8	6	38	65	64	11	9	0.58	0.25	0.39	0.81	0.67	3.56	4.66	7.79	1.19	0.9	0.54	3.62	2.744958385	0.000458072	0.005200906	--	-	-	-	-	-	-	-	-	--
Unigene0044960	2	4	0	1	1	23	21	8	9	12	0.26	0.45	0	0.09	0.1	1.91	1.34	0.86	0.86	1.06	0.18	1.206	2.744161096	0.001714702	0.015932232	--	-	-	-	-	-	-	-	-	--
Unigene0030771	0	5	5	1	1	17	43	11	16	22	0	1.02	1.04	0.16	0.18	2.57	4.98	2.16	2.79	3.55	0.48	3.21	2.741466986	0.000557701	0.006157029	--	-	-	-	-	-	-	-	-	--
Unigene0000483	5	2	7	5	1	25	34	40	23	45	0.67	0.23	0.84	0.47	0.1	2.17	2.27	4.52	2.31	4.17	0.462	3.088	2.740707996	1.08E-05	0.000194772	--	-	-	-	-	-	-	-	-	--
Unigene0002481	4	9	10	4	11	61	121	35	38	83	0.72	1.41	1.61	0.51	1.54	7.12	10.81	5.31	5.12	10.32	1.158	7.736	2.739952541	8.41E-08	2.35E-06	--	-	-	-	-	-	-	-	-	--
Unigene0000904	23	15	2	53	23	204	267	121	159	196	1.66	0.95	0.13	2.71	1.3	9.6	9.62	7.4	8.64	9.83	1.35	9.018	2.739848103	3.18E-08	9.59E-07	--	-	-	-	-	-	-	GO:0004450//isocitrate dehydrogenase (NADP+) activity	GO:0006099//tricarboxylic acid cycle	--
Unigene0035813	8	2	2	6	5	18	23	30	30	86	0.42	0.09	0.09	0.22	0.2	0.61	0.6	1.32	1.17	3.1	0.204	1.36	2.736965594	0.000175109	0.002265208	--	-	-	-	-	-	-	-	-	--
Unigene0044981	16	35	7	23	10	255	93	132	98	167	1.19	2.28	0.47	1.21	0.58	12.33	3.44	8.29	5.47	8.6	1.146	7.626	2.734319487	9.06E-08	2.51E-06	--	-	-	-	-	-	-	-	GO:0055085//transmembrane transport	--
Unigene0025872	1772	1559	1803	2106	1874	18020	22463	13150	11661	12146	80.55	62.09	73.59	67.69	66.46	532.99	508.87	505.41	398.12	382.71	70.076	465.62	2.732160696	2.61E-40	1.98E-37	CCT1	AIS24843.1 T-complex protein 1 subunit alpha [Scylla paramamosain]	-	-	-	-	GO:0000228//nuclear chromosome;GO:0000242//pericentriolar material;GO:0000314//organellar small ribosomal subunit;GO:0000785//chromatin;GO:0000792//heterochromatin;GO:0001669//acrosomal vesicle;GO:0002199//zona pellucida receptor complex;GO:0005575//cellular_component;GO:0005622//intracellular anatomical structure;GO:0005634//nucleus;GO:0005694//chromosome;GO:0005737//cytoplasm;GO:0005794//Golgi …	GO:0000166//nucleotide binding;GO:0003674//molecular_function;GO:0003735//structural constituent of ribosome;GO:0005488//binding;GO:0005515//protein binding;GO:0005524//ATP binding;GO:0016887//ATP hydrolysis activity;GO:0017076//purine nucleotide binding;GO:0019899//enzyme binding;GO:0030554//adenyl nucleotide binding;GO:0031625//ubiquitin protein ligase binding;GO:0032553//ribonucleotide binding…	GO:0000003//reproduction;GO:0002064//epithelial cell development;GO:0002065//columnar/cuboidal epithelial cell differentiation;GO:0002066//columnar/cuboidal epithelial cell development;GO:0003006//developmental process involved in reproduction;GO:0006403//RNA localization;GO:0006412//translation;GO:0006457//protein folding;GO:0006458//'de novo' protein folding;GO:0006810//transport;GO:0007021//tu…	--
Unigene0039551	1	6	4	6	1	23	44	25	35	20	0.15	0.8	0.54	0.64	0.12	2.27	3.33	3.21	3.99	2.1	0.45	2.98	2.727315424	1.90E-05	0.000322298	--	-	-	-	-	-	GO:0005765//lysosomal membrane;GO:0016021//integral component of membrane	GO:0004930//G protein-coupled receptor activity	GO:0007186//G protein-coupled receptor signaling pathway	--
Unigene0036326	0	3	2	2	2	12	26	15	14	7	0	0.47	0.32	0.25	0.28	1.4	2.32	2.27	1.88	0.87	0.264	1.748	2.72709535	0.001541886	0.014553757	--	-	-	-	-	-	GO:0016020//membrane	-	-	--
Unigene0028662	3	3	6	8	7	61	48	41	17	52	0.18	0.16	0.32	0.34	0.32	2.35	1.42	2.05	0.76	2.14	0.264	1.744	2.723790205	1.79E-06	3.85E-05	Kiaa0513	XP_045103483.1 uncharacterized protein KIAA0513-like isoform X2 [Portunus trituberculatus]	-	-	-	-	GO:0005575//cellular_component;GO:0005622//intracellular anatomical structure;GO:0005737//cytoplasm	GO:0003674//molecular_function	GO:0008150//biological_process	--
Unigene0030852	7	13	14	9	9	106	142	54	51	99	0.77	1.25	1.38	0.7	0.77	7.59	7.79	5.02	4.21	7.55	0.974	6.432	2.723273729	3.76E-11	1.86E-09	--	XP_045450407.1 uncharacterized protein LOC123659199 [Melitaea cinxia]	-	-	-	-	GO:0005840//ribosome	GO:0003735//structural constituent of ribosome	GO:0006412//translation	--
Unigene0029625	610	880	810	929	790	8349	11068	5662	4701	4407	31.77	40.16	37.88	34.21	32.1	282.93	287.27	249.33	183.89	159.1	35.224	232.504	2.722624882	5.10E-27	1.47E-24	Sar1b	XP_045128018.1 GTP-binding protein SAR1-like [Portunus trituberculatus]	Genetic Information Processing	Folding, sorting and degradation	ko04141//Protein processing in endoplasmic reticulum	K07953	GO:0000139//Golgi membrane;GO:0005575//cellular_component;GO:0005622//intracellular anatomical structure;GO:0005737//cytoplasm;GO:0005739//mitochondrion;GO:0005783//endoplasmic reticulum;GO:0005789//endoplasmic reticulum membrane;GO:0005794//Golgi apparatus;GO:0005798//Golgi-associated vesicle;GO:0012505//endomembrane system;GO:0012506//vesicle membrane;GO:0012507//ER to Golgi transport vesicle m…	GO:0000166//nucleotide binding;GO:0001882//nucleoside binding;GO:0001883//purine nucleoside binding;GO:0003674//molecular_function;GO:0003824//catalytic activity;GO:0003924//GTPase activity;GO:0005488//binding;GO:0005515//protein binding;GO:0005525//GTP binding;GO:0016462//pyrophosphatase activity;GO:0016787//hydrolase activity;GO:0016817//hydrolase activity, acting on acid anhydrides;GO:0016818/…	GO:0000266//mitochondrial fission;GO:0000902//cell morphogenesis;GO:0002164//larval development;GO:0002165//instar larval or pupal development;GO:0002168//instar larval development;GO:0002790//peptide secretion;GO:0003002//regionalization;GO:0003400//regulation of COPII vesicle coating;GO:0006810//transport;GO:0006886//intracellular protein transport;GO:0006888//endoplasmic reticulum to Golgi ves…	--
Unigene0043308	29	51	39	83	87	270	336	714	462	366	1.94	3	2.35	3.94	4.55	11.78	11.23	40.48	23.27	17.01	3.156	20.754	2.717220309	7.85E-09	2.65E-07	flz	QZX63235.1 prophenoloxidase activating enzyme [Eriocheir sinensis]	-	-	-	-	-	GO:0004252//serine-type endopeptidase activity	GO:0006508//proteolysis	--
Unigene0045452	39	56	35	79	47	465	649	352	235	424	1.65	2.08	1.33	2.37	1.55	12.81	13.7	12.6	7.47	12.45	1.796	11.806	2.716660992	8.25E-24	1.79E-21	--	XP_045107916.1 zinc finger protein OZF-like [Portunus trituberculatus]	-	-	-	-	GO:0005575//cellular_component;GO:0005622//intracellular anatomical structure;GO:0005634//nucleus;GO:0043226//organelle;GO:0043227//membrane-bounded organelle;GO:0043229//intracellular organelle;GO:0043231//intracellular membrane-bounded organelle	GO:0000976//transcription cis-regulatory region binding;GO:0000977//RNA polymerase II transcription regulatory region sequence-specific DNA binding;GO:0001067//transcription regulatory region nucleic acid binding;GO:0003674//molecular_function;GO:0003676//nucleic acid binding;GO:0003677//DNA binding;GO:0003690//double-stranded DNA binding;GO:0003700//DNA-binding transcription factor activity;GO:0…	GO:0006355//regulation of transcription, DNA-templated	zf-C2H2
Unigene0028508	11	2	8	4	4	55	39	44	65	40	0.68	0.11	0.44	0.17	0.19	2.21	1.2	2.29	3.01	1.71	0.318	2.084	2.712256607	3.86E-06	7.77E-05	--	-	-	-	-	-	-	-	-	--
Unigene0001838	7	4	9	7	2	19	151	48	34	16	0.93	0.47	1.07	0.66	0.21	1.64	9.99	5.39	3.39	1.47	0.668	4.376	2.71169273	0.000168619	0.00219079	--	-	-	-	-	-	-	-	-	--
Unigene0003527	20	10	8	8	17	131	204	42	66	126	4.22	1.85	1.52	1.19	2.8	17.99	21.46	7.5	10.46	18.43	2.316	15.168	2.711323711	6.88E-08	1.96E-06	--	-	-	-	-	-	-	-	-	--
Unigene0022289	6	9	4	1	3	44	19	104	5	7	1.67	2.19	1	0.2	0.65	7.95	2.63	24.41	1.04	1.35	1.142	7.476	2.710703918	0.00660404	0.049043445	--	-	-	-	-	-	-	-	-	--
Unigene0041341	4	7	2	5	2	47	42	39	28	9	0.66	1.01	0.29	0.58	0.26	5.01	3.43	5.4	3.45	1.02	0.56	3.662	2.709133059	8.65E-05	0.00121908	--	-	-	-	-	-	-	-	-	--
Unigene0011705	0	1	2	3	2	14	25	6	3	18	0	0.17	0.35	0.41	0.3	1.77	2.42	0.99	0.44	2.42	0.246	1.608	2.708537186	0.006278997	0.047040532	--	-	-	-	-	-	-	-	-	--
Unigene0043505	26	8	5	1	9	74	120	127	41	72	1.19	0.32	0.21	0.03	0.32	2.2	2.73	4.91	1.41	2.28	0.414	2.706	2.708459166	0.000153611	0.002015916	--	XP_045122055.1 uncharacterized protein LOC123510763 [Portunus trituberculatus]	-	-	-	-	GO:0019008//molybdopterin synthase complex	GO:0051539//4 iron, 4 sulfur cluster binding	GO:0006777//Mo-molybdopterin cofactor biosynthetic process	--
Unigene0029668	198	157	263	382	275	1604	2059	2191	2153	1969	34.31	23.84	40.93	46.81	37.19	180.89	177.84	321.07	280.26	236.54	36.616	239.32	2.708394866	1.27E-20	2.12E-18	--	XP_045117070.1 F-box/WD repeat-containing protein 7-like [Portunus trituberculatus]	-	-	-	-	-	GO:0005515//protein binding	-	--
Unigene0006326	4	2	0	5	1	32	32	7	10	23	0.29	0.13	0	0.25	0.06	1.5	1.15	0.43	0.54	1.15	0.146	0.954	2.708020897	0.000864494	0.008919901	--	XP_045112511.1 uncharacterized protein LOC123505358 [Portunus trituberculatus]	-	-	-	-	-	GO:0003964//RNA-directed DNA polymerase activity	GO:0000373//Group II intron splicing	--
Unigene0035575	4	2	0	4	1	14	48	16	11	10	0.44	0.19	0	0.31	0.09	0.99	2.61	1.47	0.9	0.76	0.206	1.346	2.707962167	0.001146026	0.011317348	FBXL16	XP_045129387.1 F-box/LRR-repeat protein 16-like [Portunus trituberculatus]	-	-	-	-	GO:0000151//ubiquitin ligase complex;GO:0005575//cellular_component;GO:0005622//intracellular anatomical structure;GO:0005737//cytoplasm;GO:0005829//cytosol;GO:0019005//SCF ubiquitin ligase complex;GO:0031461//cullin-RING ubiquitin ligase complex;GO:0032991//protein-containing complex;GO:1902494//catalytic complex;GO:1990234//transferase complex	GO:0003674//molecular_function;GO:0003824//catalytic activity;GO:0004842//ubiquitin-protein transferase activity;GO:0005515//protein binding;GO:0016740//transferase activity;GO:0019787//ubiquitin-like protein transferase activity;GO:0140096//catalytic activity, acting on a protein	GO:0000209//protein polyubiquitination;GO:0006464//cellular protein modification process;GO:0006508//proteolysis;GO:0006511//ubiquitin-dependent protein catabolic process;GO:0006807//nitrogen compound metabolic process;GO:0008150//biological_process;GO:0008152//metabolic process;GO:0009056//catabolic process;GO:0009057//macromolecule catabolic process;GO:0009987//cellular process;GO:0010498//prot…	--
Unigene0046240	19	26	19	39	32	201	271	173	160	284	0.72	0.86	0.64	1.04	0.94	4.92	5.08	5.51	4.52	7.41	0.84	5.488	2.707819249	6.15E-22	1.13E-19	Pdia5	XP_042242882.1 protein disulfide-isomerase A5-like [Homarus americanus]	-	-	-	-	GO:0005575//cellular_component;GO:0005622//intracellular anatomical structure;GO:0005737//cytoplasm;GO:0005783//endoplasmic reticulum;GO:0005788//endoplasmic reticulum lumen;GO:0005789//endoplasmic reticulum membrane;GO:0012505//endomembrane system;GO:0016020//membrane;GO:0031974//membrane-enclosed lumen;GO:0031984//organelle subcompartment;GO:0042175//nuclear outer membrane-endoplasmic reticulum…	GO:0003674//molecular_function;GO:0003756//protein disulfide isomerase activity;GO:0003824//catalytic activity;GO:0015035//protein-disulfide reductase activity;GO:0015036//disulfide oxidoreductase activity;GO:0016209//antioxidant activity;GO:0016491//oxidoreductase activity;GO:0016667//oxidoreductase activity, acting on a sulfur group of donors;GO:0016853//isomerase activity;GO:0016860//intramole…	GO:0006457//protein folding;GO:0006790//sulfur compound metabolic process;GO:0006950//response to stress;GO:0006986//response to unfolded protein;GO:0007154//cell communication;GO:0007165//signal transduction;GO:0008150//biological_process;GO:0008152//metabolic process;GO:0009987//cellular process;GO:0010033//response to organic substance;GO:0019725//cellular homeostasis;GO:0023052//signaling;GO:…	--
Unigene0036900	9	16	29	18	15	135	218	147	125	94	1.87	2.92	5.42	2.65	2.43	18.27	22.6	25.86	19.53	13.55	3.058	19.962	2.70659596	6.18E-12	3.45E-10	--	-	-	-	-	-	-	-	-	--
Unigene0044921	55	57	75	104	98	363	735	645	571	757	3.22	2.92	3.94	4.3	4.47	13.82	21.44	31.91	25.1	30.71	3.77	24.596	2.705787283	1.12E-17	1.36E-15	KAT8	XP_045132481.1 histone acetyltransferase KAT8-like [Portunus trituberculatus]	-	-	-	-	GO:0000123//histone acetyltransferase complex;GO:0000228//nuclear chromosome;GO:0000775//chromosome, centromeric region;GO:0000776//kinetochore;GO:0000803//sex chromosome;GO:0000805//X chromosome;GO:0005575//cellular_component;GO:0005622//intracellular anatomical structure;GO:0005634//nucleus;GO:0005654//nucleoplasm;GO:0005667//transcription regulator complex;GO:0005694//chromosome;GO:0005700//po…	GO:0003674//molecular_function;GO:0003676//nucleic acid binding;GO:0003682//chromatin binding;GO:0003723//RNA binding;GO:0003729//mRNA binding;GO:0003824//catalytic activity;GO:0004402//histone acetyltransferase activity;GO:0004468//lysine N-acetyltransferase activity, acting on acetyl phosphate as donor;GO:0005488//binding;GO:0005515//protein binding;GO:0008080//N-acetyltransferase activity;GO:0…	GO:0000075//cell cycle checkpoint signaling;GO:0000077//DNA damage checkpoint signaling;GO:0002376//immune system process;GO:0002520//immune system development;GO:0006139//nucleobase-containing compound metabolic process;GO:0006259//DNA metabolic process;GO:0006281//DNA repair;GO:0006325//chromatin organization;GO:0006351//transcription, DNA-templated;GO:0006355//regulation of transcription, DNA-…	--
Unigene0034243	4	4	5	5	12	46	67	59	33	35	1.19	1.05	1.34	1.05	2.79	8.93	9.96	14.88	7.39	7.24	1.484	9.68	2.705515956	1.07E-06	2.39E-05	--	-	-	-	-	-	-	-	-	--
Unigene0000576	87	117	81	45	60	757	810	907	376	398	2.61	3.07	2.18	0.95	1.4	14.76	12.1	22.98	8.46	8.27	2.042	13.314	2.704889302	7.96E-10	3.13E-08	cpe	KAG0715085.1 Carboxypeptidase E [Chionoecetes opilio]	-	-	-	-	GO:0005575//cellular_component;GO:0005576//extracellular region;GO:0005615//extracellular space;GO:0005622//intracellular anatomical structure;GO:0005634//nucleus;GO:0005737//cytoplasm;GO:0005794//Golgi apparatus;GO:0005886//plasma membrane;GO:0012505//endomembrane system;GO:0012506//vesicle membrane;GO:0016020//membrane;GO:0030133//transport vesicle;GO:0030141//secretory granule;GO:0030424//axon…	GO:0003674//molecular_function;GO:0003824//catalytic activity;GO:0004180//carboxypeptidase activity;GO:0004181//metallocarboxypeptidase activity;GO:0004185//serine-type carboxypeptidase activity;GO:0005102//signaling receptor binding;GO:0005488//binding;GO:0005515//protein binding;GO:0008233//peptidase activity;GO:0008235//metalloexopeptidase activity;GO:0008236//serine-type peptidase activity;GO…	GO:0001505//regulation of neurotransmitter levels;GO:0001956//positive regulation of neurotransmitter secretion;GO:0003007//heart morphogenesis;GO:0003205//cardiac chamber development;GO:0003206//cardiac chamber morphogenesis;GO:0003208//cardiac ventricle morphogenesis;GO:0003214//cardiac left ventricle morphogenesis;GO:0003231//cardiac ventricle development;GO:0006464//cellular protein modificat…	--
Unigene0000171	8	4	2	11	6	148	53	17	13	30	0.92	0.4	0.21	0.9	0.54	11.11	3.05	1.66	1.13	2.4	0.594	3.87	2.70379873	0.000516565	0.005767521	--	-	-	-	-	-	-	-	-	--
Unigene0005779	5	9	3	3	3	61	49	23	36	29	0.68	1.07	0.37	0.29	0.32	5.39	3.31	2.64	3.67	2.73	0.546	3.548	2.700033153	2.85E-06	5.92E-05	--	-	-	-	-	-	-	-	-	--
Unigene0001469	10	14	11	9	14	72	146	86	78	101	0.36	0.44	0.36	0.23	0.4	1.7	2.64	2.63	2.12	2.54	0.358	2.326	2.699819604	4.87E-13	3.21E-11	--	-	-	-	-	-	-	-	-	--
Unigene0007773	52	48	48	103	69	935	210	296	144	929	1.52	1.23	1.26	2.13	1.57	17.75	3.05	7.3	3.16	18.79	1.542	10.01	2.698567304	1.33E-06	2.93E-05	--	XP_045107250.1 uncharacterized protein LOC123502100 [Portunus trituberculatus]	-	-	-	-	-	-	-	--
Unigene0012725	7	8	3	15	7	32	26	130	73	20	0.61	0.61	0.23	0.93	0.48	1.82	1.13	9.59	4.78	1.21	0.572	3.706	2.695775829	0.00030994	0.003704518	--	-	-	-	-	-	-	-	-	--
Unigene0036573	90	130	71	191	117	1001	858	1142	929	647	2.82	3.56	1.99	4.22	2.86	20.38	13.38	30.21	21.83	14.03	3.09	19.966	2.691866588	8.48E-16	8.19E-14	RALGPS1	XP_045128818.1 ras-specific guanine nucleotide-releasing factor RalGPS1-like isoform X7 [Portunus trituberculatus]	-	-	-	-	GO:0005575//cellular_component	GO:0003674//molecular_function;GO:0005085//guanyl-nucleotide exchange factor activity;GO:0005488//binding;GO:0005515//protein binding;GO:0019899//enzyme binding;GO:0031267//small GTPase binding;GO:0051020//GTPase binding;GO:0098772//molecular function regulator	GO:0007264//small GTPase mediated signal transduction;GO:0008150//biological_process;GO:0009966//regulation of signal transduction;GO:0010646//regulation of cell communication;GO:0023051//regulation of signaling;GO:0032485//regulation of Ral protein signal transduction;GO:0046578//regulation of Ras protein signal transduction;GO:0048583//regulation of response to stimulus;GO:0050789//regulation o…	--
Unigene0002098	2	0	2	6	2	24	36	5	5	29	0.15	0	0.14	0.33	0.12	1.21	1.39	0.33	0.29	1.56	0.148	0.956	2.691413442	0.00346184	0.028702124	--	XP_045132794.1 uncharacterized protein LOC123517036 isoform X1 [Portunus trituberculatus]	-	-	-	-	-	GO:0019900//kinase binding	-	--
Unigene0013997	1	1	1	6	1	16	19	19	14	4	0.09	0.08	0.08	0.39	0.07	0.97	0.88	1.49	0.98	0.26	0.142	0.916	2.689456669	0.004206187	0.033647881	--	XP_045111285.1 LOW QUALITY PROTEIN: leucine-rich repeat extensin-like protein 5 [Portunus trituberculatus]	-	-	-	-	-	-	-	--
Unigene0007460	20	5	0	4	13	13	127	138	18	56	1.88	0.41	0	0.27	0.96	0.8	5.96	11	1.27	3.66	0.704	4.538	2.688409275	0.005152027	0.039974585	aspB	XP_045113827.1 LOW QUALITY PROTEIN: aspartate aminotransferase-like [Portunus trituberculatus]	Metabolism;Metabolism;Metabolism;Metabolism;Metabolism	Global and overview maps;Global and overview maps;Amino acid metabolism;Amino acid metabolism;Amino acid metabolism	ko01100//Metabolic pathways;ko01230//Biosynthesis of amino acids;ko00350//Tyrosine metabolism;ko00360//Phenylalanine metabolism;ko00400//Phenylalanine, tyrosine and tryptophan biosynthesis	K15849;K15849;K15849;K15849;K15849	GO:0005737//cytoplasm	GO:0003677//DNA binding;GO:0003824//catalytic activity;GO:0004400//histidinol-phosphate transaminase activity;GO:0004838//L-tyrosine:2-oxoglutarate aminotransferase activity;GO:0009016//succinyldiaminopimelate transaminase activity;GO:0030170//pyridoxal phosphate binding;GO:0047688//aspartate 4-decarboxylase activity;GO:0048472//threonine-phosphate decarboxylase activity	GO:0000105//histidine biosynthetic process;GO:0006531//aspartate metabolic process;GO:0006559//L-phenylalanine catabolic process;GO:0006572//tyrosine catabolic process;GO:0009058//biosynthetic process;GO:0009236//cobalamin biosynthetic process;GO:0019877//diaminopimelate biosynthetic process;GO:0042398//cellular modified amino acid biosynthetic process	--
Unigene0000241	29	78	63	117	35	594	801	644	208	307	3.76	8.87	7.34	10.74	3.55	50.18	51.83	70.69	20.28	27.63	6.852	44.122	2.686901132	1.25E-09	4.78E-08	--	-	-	-	-	-	-	-	-	--
Unigene0043981	100	120	104	113	77	1060	810	850	851	536	4.1	4.31	3.83	3.27	2.46	28.26	16.54	29.45	26.19	15.23	3.594	23.134	2.686352424	6.14E-18	7.73E-16	--	-	-	-	-	-	-	-	-	--
Unigene0020940	26	18	41	45	58	312	314	247	410	182	1.68	1.02	2.38	2.05	2.92	13.1	10.1	13.48	19.87	8.14	2.01	12.938	2.686347211	1.57E-10	6.94E-09	ESPL1	KAG0716796.1 Separin [Chionoecetes opilio]	-	-	-	-	GO:0000228//nuclear chromosome;GO:0000781//chromosome, telomeric region;GO:0005575//cellular_component;GO:0005622//intracellular anatomical structure;GO:0005634//nucleus;GO:0005694//chromosome;GO:0005700//polytene chromosome;GO:0005705//polytene chromosome interband;GO:0005737//cytoplasm;GO:0005739//mitochondrion;GO:0005813//centrosome;GO:0005815//microtubule organizing center;GO:0005816//spindle…	GO:0003674//molecular_function;GO:0003824//catalytic activity;GO:0004175//endopeptidase activity;GO:0004197//cysteine-type endopeptidase activity;GO:0005488//binding;GO:0005515//protein binding;GO:0008233//peptidase activity;GO:0008234//cysteine-type peptidase activity;GO:0016787//hydrolase activity;GO:0140096//catalytic activity, acting on a protein	GO:0000003//reproduction;GO:0000070//mitotic sister chromatid segregation;GO:0000212//meiotic spindle organization;GO:0000226//microtubule cytoskeleton organization;GO:0000278//mitotic cell cycle;GO:0000280//nuclear division;GO:0000281//mitotic cytokinesis;GO:0000723//telomere maintenance;GO:0000819//sister chromatid segregation;GO:0000910//cytokinesis;GO:0006139//nucleobase-containing compound m…	--
Unigene0036668	500	634	497	562	602	4973	6445	3545	3813	4067	40.99	45.54	36.58	32.58	38.51	265.28	263.32	245.73	234.78	231.11	38.84	248.044	2.674980954	9.08E-44	8.79E-41	CCT2	XP_045110410.1 T-complex protein 1 subunit beta-like [Portunus trituberculatus]	-	-	-	-	-	GO:0005515//protein binding;GO:0005524//ATP binding;GO:0016887//ATP hydrolysis activity	GO:0006457//protein folding	--
Unigene0018647	2	2	2	1	0	8	8	16	9	15	0.57	0.5	0.52	0.2	0	1.49	1.14	3.88	1.94	2.98	0.358	2.286	2.674793911	0.004793359	0.037608318	--	-	-	-	-	-	-	GO:0022857//transmembrane transporter activity	GO:0055085//transmembrane transport	--
Unigene0036717	31	40	21	12	15	491	201	99	139	88	3.76	4.25	2.29	1.03	1.42	38.76	12.15	10.16	12.67	7.4	2.55	16.228	2.669916055	6.34E-06	0.00012118	--	XP_045132219.1 uncharacterized protein LOC123516680 [Portunus trituberculatus]	-	-	-	-	-	-	-	--
Unigene0041056	4	16	5	12	6	77	59	125	35	23	0.64	2.24	0.72	1.36	0.75	8	4.7	16.88	4.2	2.55	1.142	7.266	2.669598715	6.08E-05	0.000894045	--	KAG0720311.1 hypothetical protein GWK47_006855 [Chionoecetes opilio]	-	-	-	-	-	-	-	--
Unigene0025672	81	117	124	259	137	1947	1464	770	564	929	4.97	6.28	6.83	11.23	6.55	77.66	44.73	39.91	25.97	39.48	7.172	45.55	2.667003661	6.26E-14	4.69E-12	Samui	XP_045112079.1 BAG domain-containing protein Samui-like isoform X1 [Portunus trituberculatus]	-	-	-	-	-	GO:0051087//chaperone binding	-	--
Unigene0000813	69	89	89	47	64	457	782	653	422	589	11.58	13.09	13.42	5.58	8.38	49.92	65.42	92.69	53.21	68.54	10.41	65.956	2.663533838	3.28E-15	2.92E-13	--	KAG0722361.1 RNA-directed DNA polymerase from mobile element jockey [Chionoecetes opilio]	-	-	-	-	-	-	-	--
Unigene0041533	1	3	2	6	4	31	36	9	20	28	0.11	0.3	0.2	0.48	0.35	2.29	2.04	0.86	1.71	2.2	0.288	1.82	2.659797734	0.000104151	0.001427071	--	-	-	-	-	-	GO:0016020//membrane	GO:0038023//signaling receptor activity	-	--
Unigene0006988	73	86	105	78	79	740	1062	432	651	585	4.74	4.89	6.12	3.58	4	31.24	34.34	23.7	31.73	26.31	4.666	29.464	2.65869509	1.39E-25	3.50E-23	--	XP_045117248.1 glomulin-like isoform X1 [Portunus trituberculatus]	-	-	-	-	GO:0000151//ubiquitin ligase complex;GO:0005575//cellular_component;GO:0005622//intracellular anatomical structure;GO:0005737//cytoplasm;GO:0031461//cullin-RING ubiquitin ligase complex;GO:0031462//Cul2-RING ubiquitin ligase complex;GO:0031463//Cul3-RING ubiquitin ligase complex;GO:0031464//Cul4A-RING E3 ubiquitin ligase complex;GO:0032991//protein-containing complex;GO:0080008//Cul4-RING E3 ubiq…	GO:0003674//molecular_function;GO:0004857//enzyme inhibitor activity;GO:0005102//signaling receptor binding;GO:0005171//hepatocyte growth factor receptor binding;GO:0005488//binding;GO:0005515//protein binding;GO:0019899//enzyme binding;GO:0030234//enzyme regulator activity;GO:0031625//ubiquitin protein ligase binding;GO:0044389//ubiquitin-like protein ligase binding;GO:0055105//ubiquitin-protein…	GO:0001568//blood vessel development;GO:0001570//vasculogenesis;GO:0001817//regulation of cytokine production;GO:0001819//positive regulation of cytokine production;GO:0001838//embryonic epithelial tube formation;GO:0001841//neural tube formation;GO:0001843//neural tube closure;GO:0001944//vasculature development;GO:0002009//morphogenesis of an epithelium;GO:0002682//regulation of immune system p…	--
Unigene0038088	29	63	71	57	60	568	838	224	353	350	3.47	6.6	7.62	4.82	5.59	44.17	49.91	22.64	31.69	28.99	5.62	35.48	2.658363974	3.61E-14	2.82E-12	Cbp20	XP_045105229.1 nuclear cap-binding protein subunit 2-like [Portunus trituberculatus]	Genetic Information Processing;Genetic Information Processing;Genetic Information Processing	Transcription;Translation;Translation	ko03040//Spliceosome;ko03013//Nucleocytoplasmic transport;ko03015//mRNA surveillance pathway	K12883;K12883;K12883	GO:0005575//cellular_component;GO:0005622//intracellular anatomical structure;GO:0005634//nucleus;GO:0005635//nuclear envelope;GO:0005654//nucleoplasm;GO:0005681//spliceosomal complex;GO:0005737//cytoplasm;GO:0005845//mRNA cap binding complex;GO:0005846//nuclear cap binding complex;GO:0012505//endomembrane system;GO:0031967//organelle envelope;GO:0031974//membrane-enclosed lumen;GO:0031975//envel…	GO:0000339//RNA cap binding;GO:0000340//RNA 7-methylguanosine cap binding;GO:0003674//molecular_function;GO:0003676//nucleic acid binding;GO:0003723//RNA binding;GO:0003729//mRNA binding;GO:0005488//binding;GO:0005515//protein binding;GO:0017069//snRNA binding;GO:0097159//organic cyclic compound binding;GO:1901363//heterocyclic compound binding	GO:0000184//nuclear-transcribed mRNA catabolic process, nonsense-mediated decay;GO:0000375//RNA splicing, via transesterification reactions;GO:0000377//RNA splicing, via transesterification reactions with bulged adenosine as nucleophile;GO:0000394//RNA splicing, via endonucleolytic cleavage and ligation;GO:0000398//mRNA splicing, via spliceosome;GO:0000956//nuclear-transcribed mRNA catabolic proc…	--
Unigene0026846	2282	2137	2839	3727	3469	29790	29284	16834	20940	17408	116.29	95.42	129.9	134.3	137.93	987.8	743.71	725.34	801.47	614.91	122.768	774.646	2.657602609	6.91E-28	2.12E-25	Hsc70-5	AHA61464.1 heat shock protein 70 [Eriocheir sinensis]	Organismal Systems;Genetic Information Processing	Aging;Folding, sorting and degradation	ko04212//Longevity regulating pathway - worm;ko03018//RNA degradation	K04043;K04043	GO:0001405//PAM complex, Tim23 associated import motor;GO:0005575//cellular_component;GO:0005576//extracellular region;GO:0005618//cell wall;GO:0005622//intracellular anatomical structure;GO:0005634//nucleus;GO:0005730//nucleolus;GO:0005737//cytoplasm;GO:0005739//mitochondrion;GO:0005740//mitochondrial envelope;GO:0005743//mitochondrial inner membrane;GO:0005744//TIM23 mitochondrial import inner …	GO:0000166//nucleotide binding;GO:0003674//molecular_function;GO:0003824//catalytic activity;GO:0005488//binding;GO:0005515//protein binding;GO:0005524//ATP binding;GO:0016462//pyrophosphatase activity;GO:0016773//phosphotransferase activity, alcohol group as acceptor;GO:0016787//hydrolase activity;GO:0016817//hydrolase activity, acting on acid anhydrides;GO:0016818//hydrolase activity, acting on…	GO:0000422//autophagy of mitochondrion;GO:0002262//myeloid cell homeostasis;GO:0002376//immune system process;GO:0002520//immune system development;GO:0002682//regulation of immune system process;GO:0002683//negative regulation of immune system process;GO:0005975//carbohydrate metabolic process;GO:0006457//protein folding;GO:0006464//cellular protein modification process;GO:0006468//protein phosp…	--
Unigene0013236	3	2	0	3	1	24	15	5	9	20	0.59	0.34	0	0.42	0.15	3.07	1.47	0.83	1.33	2.73	0.3	1.886	2.65229527	0.002964312	0.02517852	--	-	-	-	-	-	-	-	-	--
Unigene0002567	9	20	20	4	6	88	129	60	128	85	1.15	2.23	2.29	0.36	0.6	7.29	8.18	6.46	12.24	7.5	1.326	8.334	2.651928325	3.84E-07	9.42E-06	--	-	-	-	-	-	-	-	-	--
Unigene0009055	0	2	3	3	1	4	14	12	22	14	0	0.5	0.77	0.61	0.22	0.75	2	2.91	4.74	2.79	0.42	2.638	2.650983332	0.005304703	0.040979616	--	KAG0724914.1 hypothetical protein GWK47_039633 [Chionoecetes opilio]	-	-	-	-	GO:0033588//elongator holoenzyme complex	-	GO:0002098//tRNA wobble uridine modification	--
Unigene0001001	14	11	5	18	1	121	86	54	59	73	1.43	0.98	0.46	1.3	0.08	8.02	4.36	4.65	4.51	5.15	0.85	5.338	2.650764559	2.97E-07	7.42E-06	--	CAF0833639.1 unnamed protein product [Brachionus calyciflorus]	Genetic Information Processing	Translation	ko03008//Ribosome biogenesis in eukaryotes	K14530	-	-	-	--
Unigene0004643	100	112	99	145	121	1114	1089	697	644	1004	21.81	21.4	19.39	22.36	20.59	158.08	118.36	128.52	105.48	151.77	21.11	132.442	2.649362218	2.76E-39	1.69E-36	SRPRA	XP_045120831.1 signal recognition particle receptor subunit alpha-like isoform X1 [Portunus trituberculatus]	Genetic Information Processing	Folding, sorting and degradation	ko03060//Protein export	K13431	GO:0005575//cellular_component;GO:0005622//intracellular anatomical structure;GO:0005737//cytoplasm;GO:0005783//endoplasmic reticulum;GO:0005785//signal recognition particle receptor complex;GO:0005789//endoplasmic reticulum membrane;GO:0005791//rough endoplasmic reticulum;GO:0012505//endomembrane system;GO:0016020//membrane;GO:0030867//rough endoplasmic reticulum membrane;GO:0031090//organelle m…	GO:0000166//nucleotide binding;GO:0001882//nucleoside binding;GO:0001883//purine nucleoside binding;GO:0003674//molecular_function;GO:0003676//nucleic acid binding;GO:0003723//RNA binding;GO:0003824//catalytic activity;GO:0003924//GTPase activity;GO:0005047//signal recognition particle binding;GO:0005488//binding;GO:0005525//GTP binding;GO:0016462//pyrophosphatase activity;GO:0016787//hydrolase a…	GO:0000902//cell morphogenesis;GO:0000904//cell morphogenesis involved in differentiation;GO:0002791//regulation of peptide secretion;GO:0006605//protein targeting;GO:0006612//protein targeting to membrane;GO:0006613//cotranslational protein targeting to membrane;GO:0006614//SRP-dependent cotranslational protein targeting to membrane;GO:0006810//transport;GO:0006886//intracellular protein transpo…	--
Unigene0038409	4	3	7	18	7	43	59	37	77	69	0.46	0.3	0.72	1.47	0.63	3.22	3.39	3.6	6.66	5.51	0.716	4.476	2.644178544	6.42E-07	1.51E-05	--	-	-	-	-	-	GO:0030127//COPII vesicle coat;GO:0042651//thylakoid membrane	GO:0003677//DNA binding;GO:0008270//zinc ion binding;GO:0046872//metal ion binding	GO:0006886//intracellular protein transport;GO:0006888//endoplasmic reticulum to Golgi vesicle-mediated transport	zf-C2H2
Unigene0005778	115	426	129	273	161	4512	1631	742	412	1560	5.43	17.63	5.47	9.12	5.93	138.69	38.4	29.64	14.62	51.08	8.716	54.486	2.64414748	8.32E-06	0.00015427	CREB1	XP_045131454.1 cyclic AMP-dependent transcription factor ATF-1-like isoform X1 [Portunus trituberculatus]	-	-	-	-	GO:0000228//nuclear chromosome;GO:0000785//chromatin;GO:0000791//euchromatin;GO:0005575//cellular_component;GO:0005622//intracellular anatomical structure;GO:0005634//nucleus;GO:0005654//nucleoplasm;GO:0005667//transcription regulator complex;GO:0005694//chromosome;GO:0005737//cytoplasm;GO:0005739//mitochondrion;GO:0005759//mitochondrial matrix;GO:0030424//axon;GO:0031974//membrane-enclosed lumen…	GO:0000976//transcription cis-regulatory region binding;GO:0000977//RNA polymerase II transcription regulatory region sequence-specific DNA binding;GO:0000978//RNA polymerase II cis-regulatory region sequence-specific DNA binding;GO:0000981//DNA-binding transcription factor activity, RNA polymerase II-specific;GO:0000987//cis-regulatory region sequence-specific DNA binding;GO:0001067//transcripti…	GO:0000902//cell morphogenesis;GO:0000904//cell morphogenesis involved in differentiation;GO:0001101//response to acid chemical;GO:0001666//response to hypoxia;GO:0001817//regulation of cytokine production;GO:0001819//positive regulation of cytokine production;GO:0002682//regulation of immune system process;GO:0002684//positive regulation of immune system process;GO:0002761//regulation of myeloid…	TF_bZIP
Unigene0026095	120	927	173	228	69	1946	2862	2240	2296	2631	7.52	50.92	9.74	10.11	3.37	79.38	89.41	118.73	108.1	114.32	16.332	101.988	2.642626036	0.000496103	0.005568495	--	UIX26759.1 Krueppel 1-like protein [Scylla paramamosain]	-	-	-	-	-	-	-	zf-C2H2
Unigene0008756	0	5	1	6	1	22	27	22	2	23	0	0.97	0.2	0.94	0.17	3.18	2.99	4.14	0.33	3.55	0.456	2.838	2.63776886	0.005723812	0.043666603	--	-	-	-	-	-	-	GO:0030246//carbohydrate binding	-	--
Unigene0003364	7	13	7	13	8	28	131	40	125	55	1.54	2.5	1.38	2.02	1.37	4	14.32	7.42	20.6	8.36	1.762	10.94	2.634326909	3.18E-06	6.54E-05	--	-	-	-	-	-	GO:0005576//extracellular region	-	GO:0042157//lipoprotein metabolic process	--
Unigene0038019	6	12	19	5	7	40	96	101	107	35	1.06	1.86	3.01	0.62	0.96	4.59	8.44	15.07	14.18	4.28	1.502	9.312	2.632206245	2.09E-05	0.000351357	--	-	-	-	-	-	-	-	-	--
Unigene0030899	271	245	322	445	363	2921	3373	2110	1797	2573	13.57	10.75	14.48	15.76	14.18	95.18	84.18	89.34	67.59	89.31	13.748	85.12	2.630276394	4.90E-40	3.40E-37	LMAN1	AIM45537.1 ERGIC-53 [Eriocheir sinensis]	Genetic Information Processing	Folding, sorting and degradation	ko04141//Protein processing in endoplasmic reticulum	K10080	GO:0000139//Golgi membrane;GO:0005575//cellular_component;GO:0005622//intracellular anatomical structure;GO:0005737//cytoplasm;GO:0005783//endoplasmic reticulum;GO:0005789//endoplasmic reticulum membrane;GO:0005793//endoplasmic reticulum-Golgi intermediate compartment;GO:0005794//Golgi apparatus;GO:0005798//Golgi-associated vesicle;GO:0012505//endomembrane system;GO:0012506//vesicle membrane;GO:0…	GO:0003674//molecular_function;GO:0005488//binding;GO:0005509//calcium ion binding;GO:0005515//protein binding;GO:0005537//mannose binding;GO:0030246//carbohydrate binding;GO:0036094//small molecule binding;GO:0042802//identical protein binding;GO:0043167//ion binding;GO:0043169//cation binding;GO:0046872//metal ion binding;GO:0048029//monosaccharide binding;GO:0051082//unfolded protein binding	GO:0006457//protein folding;GO:0006810//transport;GO:0006888//endoplasmic reticulum to Golgi vesicle-mediated transport;GO:0006900//vesicle budding from membrane;GO:0006901//vesicle coating;GO:0006903//vesicle targeting;GO:0006950//response to stress;GO:0006996//organelle organization;GO:0007029//endoplasmic reticulum organization;GO:0007030//Golgi organization;GO:0007596//blood coagulation;GO:00…	--
Unigene0020413	4	3	13	4	8	38	65	67	39	38	0.67	0.44	1.96	0.47	1.05	4.15	5.43	9.5	4.91	4.42	0.918	5.682	2.629832773	7.38E-06	0.000138192	--	KAG0722361.1 RNA-directed DNA polymerase from mobile element jockey [Chionoecetes opilio]	-	-	-	-	-	-	-	--
Unigene0005372	9	12	16	20	1	97	82	78	113	67	1.09	1.28	1.75	1.72	0.09	7.67	4.97	8.01	10.31	5.64	1.186	7.32	2.625739639	2.28E-07	5.83E-06	--	-	-	-	-	-	-	-	-	--
Unigene0004644	267	368	313	472	419	3816	3423	2048	2061	2852	18.44	22.27	19.41	23.05	22.58	171.52	117.84	119.61	106.93	136.56	21.15	130.492	2.625231795	1.13E-33	4.76E-31	Gtp-bp	XP_045120832.1 signal recognition particle receptor subunit alpha-like isoform X2 [Portunus trituberculatus]	Genetic Information Processing	Folding, sorting and degradation	ko03060//Protein export	K13431	GO:0005575//cellular_component;GO:0005622//intracellular anatomical structure;GO:0005737//cytoplasm;GO:0005783//endoplasmic reticulum;GO:0005785//signal recognition particle receptor complex;GO:0005786//signal recognition particle, endoplasmic reticulum targeting;GO:0005789//endoplasmic reticulum membrane;GO:0005791//rough endoplasmic reticulum;GO:0012505//endomembrane system;GO:0016020//membrane…	GO:0000166//nucleotide binding;GO:0001882//nucleoside binding;GO:0001883//purine nucleoside binding;GO:0003674//molecular_function;GO:0003676//nucleic acid binding;GO:0003723//RNA binding;GO:0003824//catalytic activity;GO:0003924//GTPase activity;GO:0005047//signal recognition particle binding;GO:0005048//signal sequence binding;GO:0005488//binding;GO:0005524//ATP binding;GO:0005525//GTP binding;…	GO:0000902//cell morphogenesis;GO:0000904//cell morphogenesis involved in differentiation;GO:0002791//regulation of peptide secretion;GO:0006605//protein targeting;GO:0006612//protein targeting to membrane;GO:0006613//cotranslational protein targeting to membrane;GO:0006614//SRP-dependent cotranslational protein targeting to membrane;GO:0006617//SRP-dependent cotranslational protein targeting to …	--
Unigene0018185	57	118	47	82	70	1473	602	296	175	432	7.24	13.14	5.36	7.37	6.94	121.81	38.13	31.81	16.7	38.06	8.01	49.302	2.621772025	1.10E-06	2.45E-05	--	-	-	-	-	-	-	-	-	--
Unigene0022832	4	5	5	5	9	53	93	28	33	21	0.46	0.5	0.51	0.4	0.8	3.93	5.29	2.7	2.83	1.66	0.534	3.282	2.619663592	7.41E-06	0.000138509	--	-	-	-	-	-	-	-	GO:0039653//suppression by virus of host transcription	--
Unigene0044593	5	25	10	21	12	93	92	152	75	112	0.86	3.78	1.55	2.56	1.61	10.44	7.91	22.17	9.72	13.39	2.072	12.726	2.618683119	9.01E-08	2.50E-06	--	-	-	-	-	-	-	-	-	--
Unigene0036972	1	3	2	8	2	13	17	13	39	29	0.29	0.77	0.53	1.67	0.46	2.49	2.5	3.24	8.63	5.92	0.744	4.556	2.614393221	0.00087785	0.009022733	--	-	-	-	-	-	-	-	-	--
Unigene0004439	2	1	3	7	1	11	25	16	25	25	0.42	0.18	0.56	1.03	0.16	1.49	2.59	2.81	3.9	3.6	0.47	2.878	2.61433393	0.000440252	0.005029696	--	-	-	-	-	-	-	-	-	--
Unigene0044594	426	513	496	591	480	5082	4551	2368	4193	3120	49.6	52.33	51.85	48.65	43.6	385	264.06	233.11	366.66	251.79	49.206	300.124	2.608652543	5.30E-28	1.64E-25	--	XP_045136799.1 selenoprotein S A-like [Portunus trituberculatus]	Genetic Information Processing	Folding, sorting and degradation	ko04141//Protein processing in endoplasmic reticulum	K14025	GO:0015627//type II protein secretion system complex;GO:0030176//integral component of endoplasmic reticulum membrane	-	GO:0006886//intracellular protein transport;GO:0015628//protein secretion by the type II secretion system	--
Unigene0015868	41	63	32	116	46	689	605	450	138	358	1.27	1.71	0.89	2.54	1.11	13.86	9.32	11.76	3.2	7.67	1.504	9.162	2.606857996	3.07E-09	1.10E-07	Rubcn	XP_045131395.1 run domain Beclin-1-interacting and cysteine-rich domain-containing protein-like isoform X1 [Portunus trituberculatus]	Cellular Processes	Transport and catabolism	ko04140//Autophagy - animal	K19330	GO:0000323//lytic vacuole;GO:0005575//cellular_component;GO:0005622//intracellular anatomical structure;GO:0005634//nucleus;GO:0005654//nucleoplasm;GO:0005737//cytoplasm;GO:0005764//lysosome;GO:0005768//endosome;GO:0005769//early endosome;GO:0005770//late endosome;GO:0005773//vacuole;GO:0005829//cytosol;GO:0012505//endomembrane system;GO:0031410//cytoplasmic vesicle;GO:0031974//membrane-enclosed …	GO:0003674//molecular_function	GO:0002376//immune system process;GO:0006810//transport;GO:0006897//endocytosis;GO:0006909//phagocytosis;GO:0006914//autophagy;GO:0008150//biological_process;GO:0008152//metabolic process;GO:0009056//catabolic process;GO:0009892//negative regulation of metabolic process;GO:0009894//regulation of catabolic process;GO:0009895//negative regulation of catabolic process;GO:0009987//cellular process;GO…	--
Unigene0025601	4	15	10	2	11	92	68	47	33	87	0.25	0.83	0.57	0.09	0.54	3.8	2.15	2.52	1.57	3.83	0.456	2.774	2.604862058	9.85E-06	0.000178852	--	-	-	-	-	-	-	-	-	--
Unigene0031046	3	3	0	4	3	31	32	5	25	10	0.52	0.46	0	0.49	0.41	3.49	2.76	0.73	3.25	1.2	0.376	2.286	2.604020837	0.001720619	0.015976517	GK10218	KAG0715162.1 Ubiquitin-like modifier-activating enzyme 5 [Chionoecetes opilio]	-	-	-	-	GO:0005575//cellular_component;GO:0005622//intracellular anatomical structure;GO:0005634//nucleus;GO:0005737//cytoplasm;GO:0005794//Golgi apparatus;GO:0005829//cytosol;GO:0012505//endomembrane system;GO:0019008//molybdopterin synthase complex;GO:0032991//protein-containing complex;GO:0043226//organelle;GO:0043227//membrane-bounded organelle;GO:0043229//intracellular organelle;GO:0043231//intracel…	GO:0000166//nucleotide binding;GO:0003674//molecular_function;GO:0003824//catalytic activity;GO:0005488//binding;GO:0005515//protein binding;GO:0005524//ATP binding;GO:0008641//ubiquitin-like modifier activating enzyme activity;GO:0016740//transferase activity;GO:0016772//transferase activity, transferring phosphorus-containing groups;GO:0016779//nucleotidyltransferase activity;GO:0016874//ligase…	GO:0000003//reproduction;GO:0003008//system process;GO:0006464//cellular protein modification process;GO:0006777//Mo-molybdopterin cofactor biosynthetic process;GO:0006793//phosphorus metabolic process;GO:0006796//phosphate-containing compound metabolic process;GO:0006807//nitrogen compound metabolic process;GO:0006950//response to stress;GO:0007275//multicellular organism development;GO:0007568/…	--
Unigene0038762	34	57	61	90	46	492	594	328	382	387	2.28	3.36	3.68	4.28	2.41	21.51	19.89	18.63	19.27	18.02	3.202	19.464	2.603763012	1.75E-29	5.79E-27	--	XP_045134004.1 formin-like protein 20 [Portunus trituberculatus]	-	-	-	-	-	-	-	--
Unigene0035672	7	3	2	1	2	24	40	16	25	22	0.57	0.21	0.15	0.06	0.13	1.28	1.63	1.1	1.53	1.25	0.224	1.358	2.599912842	8.62E-05	0.001215891	--	-	-	-	-	-	-	-	-	--
Unigene0013647	3	1	0	5	2	33	31	8	6	9	0.84	0.25	0	0.99	0.44	6.01	4.32	1.89	1.26	1.75	0.504	3.046	2.595420303	0.0047799	0.037538076	--	-	-	-	-	-	-	-	-	--
Unigene0001731	24	38	10	74	47	431	272	234	181	271	0.81	1.12	0.3	1.77	1.24	9.47	4.58	6.68	4.59	6.34	1.048	6.332	2.595022539	5.40E-09	1.86E-07	--	-	-	-	-	-	-	-	-	--
Unigene0024444	9	7	1	11	1	45	41	42	43	45	0.69	0.47	0.07	0.6	0.06	2.24	1.57	2.72	2.48	2.39	0.378	2.28	2.592575685	7.53E-06	0.000140588	--	XP_033118776.1 uncharacterized protein LOC117118315 [Anneissia japonica]	-	-	-	-	-	-	-	--
Unigene0000221	15	23	20	24	32	237	262	131	78	171	3.06	4.12	3.67	3.47	5.1	31.49	26.66	22.62	11.96	24.2	3.884	23.386	2.590030015	1.57E-11	8.24E-10	SSR2	XP_045123127.1 translocon-associated protein subunit beta-like [Portunus trituberculatus]	Genetic Information Processing	Folding, sorting and degradation	ko04141//Protein processing in endoplasmic reticulum	K13250	GO:0005575//cellular_component;GO:0005622//intracellular anatomical structure;GO:0005737//cytoplasm;GO:0005783//endoplasmic reticulum;GO:0005786//signal recognition particle, endoplasmic reticulum targeting;GO:0005789//endoplasmic reticulum membrane;GO:0012505//endomembrane system;GO:0016020//membrane;GO:0016021//integral component of membrane;GO:0031224//intrinsic component of membrane;GO:003198…	GO:0003674//molecular_function;GO:0005048//signal sequence binding;GO:0005488//binding;GO:0033218//amide binding;GO:0042277//peptide binding	GO:0006605//protein targeting;GO:0006612//protein targeting to membrane;GO:0006613//cotranslational protein targeting to membrane;GO:0006810//transport;GO:0006886//intracellular protein transport;GO:0008104//protein localization;GO:0008150//biological_process;GO:0015031//protein transport;GO:0015833//peptide transport;GO:0033036//macromolecule localization;GO:0034613//cellular protein localizatio…	--
Unigene0002472	31	46	42	47	52	385	517	309	214	246	1.78	2.32	2.17	1.91	2.33	14.39	14.8	15.01	9.23	9.8	2.102	12.646	2.58884655	4.31E-18	5.66E-16	Wdr3	XP_045126627.1 WD repeat-containing protein 3-like isoform X1 [Portunus trituberculatus]	Genetic Information Processing	Translation	ko03008//Ribosome biogenesis in eukaryotes	K14556	GO:0005575//cellular_component;GO:0005622//intracellular anatomical structure;GO:0005634//nucleus;GO:0005635//nuclear envelope;GO:0005654//nucleoplasm;GO:0005730//nucleolus;GO:0012505//endomembrane system;GO:0016020//membrane;GO:0030684//preribosome;GO:0030686//90S preribosome;GO:0031090//organelle membrane;GO:0031965//nuclear membrane;GO:0031967//organelle envelope;GO:0031974//membrane-enclosed …	GO:0003674//molecular_function;GO:0003676//nucleic acid binding;GO:0003723//RNA binding;GO:0005488//binding;GO:0005515//protein binding;GO:0030515//snoRNA binding;GO:0097159//organic cyclic compound binding;GO:1901363//heterocyclic compound binding	GO:0000447//endonucleolytic cleavage in ITS1 to separate SSU-rRNA from 5.8S rRNA and LSU-rRNA from tricistronic rRNA transcript (SSU-rRNA, 5.8S rRNA, LSU-rRNA);GO:0000460//maturation of 5.8S rRNA;GO:0000462//maturation of SSU-rRNA from tricistronic rRNA transcript (SSU-rRNA, 5.8S rRNA, LSU-rRNA);GO:0000466//maturation of 5.8S rRNA from tricistronic rRNA transcript (SSU-rRNA, 5.8S rRNA, LSU-rRNA);…	--
Unigene0011917	4	1	3	2	0	8	26	12	24	11	0.85	0.19	0.57	0.3	0	1.11	2.76	2.16	3.84	1.62	0.382	2.298	2.588734255	0.002303207	0.020490769	--	-	-	-	-	-	-	-	-	--
Unigene0035211	16	15	22	28	7	88	63	104	286	79	4.04	3.32	4.99	5	1.38	14.45	7.92	22.19	54.22	13.82	3.746	22.52	2.587784023	1.47E-05	0.00025602	--	-	-	-	-	-	-	-	-	--
Unigene0042334	60	106	89	127	80	942	761	594	439	679	5.6	8.66	7.45	8.38	5.82	57.16	35.37	46.84	30.75	43.89	7.182	42.802	2.575220653	1.66E-22	3.25E-20	--	-	-	-	-	-	-	-	-	--
Unigene0023822	3	1	1	7	4	42	38	12	8	20	0.35	0.1	0.1	0.57	0.36	3.16	2.19	1.17	0.7	1.6	0.296	1.764	2.57518148	0.001033893	0.010377295	--	-	-	-	-	-	-	-	-	--
Unigene0033394	250	259	278	398	294	3417	2466	1779	1637	1696	17.02	15.45	16.99	19.16	15.61	151.34	83.65	102.39	83.69	80.02	16.846	100.218	2.572663676	9.51E-23	1.89E-20	sec61ab	XP_045605251.1 protein transport protein Sec61 subunit alpha [Procambarus clarkii]	Genetic Information Processing;Cellular Processes;Genetic Information Processing	Folding, sorting and degradation;Transport and catabolism;Folding, sorting and degradation	ko04141//Protein processing in endoplasmic reticulum;ko04145//Phagosome;ko03060//Protein export	K10956;K10956;K10956	GO:0000322//storage vacuole;GO:0000323//lytic vacuole;GO:0000324//fungal-type vacuole;GO:0005575//cellular_component;GO:0005622//intracellular anatomical structure;GO:0005737//cytoplasm;GO:0005773//vacuole;GO:0005783//endoplasmic reticulum;GO:0005784//Sec61 translocon complex;GO:0005789//endoplasmic reticulum membrane;GO:0005791//rough endoplasmic reticulum;GO:0005886//plasma membrane;GO:0005887/…	GO:0003674//molecular_function;GO:0005048//signal sequence binding;GO:0005215//transporter activity;GO:0005488//binding;GO:0008320//protein transmembrane transporter activity;GO:0015399//primary active transmembrane transporter activity;GO:0015450//protein-transporting ATPase activity;GO:0022804//active transmembrane transporter activity;GO:0022857//transmembrane transporter activity;GO:0022884//…	GO:0001700//embryonic development via the syncytial blastoderm;GO:0002009//morphogenesis of an epithelium;GO:0006508//proteolysis;GO:0006511//ubiquitin-dependent protein catabolic process;GO:0006605//protein targeting;GO:0006612//protein targeting to membrane;GO:0006613//cotranslational protein targeting to membrane;GO:0006614//SRP-dependent cotranslational protein targeting to membrane;GO:000661…	--
Unigene0039825	2043	1882	1940	2848	2275	21335	16974	13505	17905	11044	73.94	59.68	63.04	72.88	64.24	502.43	306.15	413.27	486.71	277.06	66.756	397.124	2.572620136	2.09E-22	4.03E-20	--	XP_045102123.1 basic salivary proline-rich protein 1-like [Portunus trituberculatus]	-	-	-	-	-	-	-	--
Unigene0036707	8	14	9	9	7	80	97	44	51	91	0.69	1.06	0.7	0.55	0.47	4.49	4.17	3.21	3.3	5.44	0.694	4.122	2.570336937	2.49E-10	1.06E-08	PHR	XP_045137570.1 deoxyribodipyrimidine photo-lyase-like isoform X1 [Portunus trituberculatus]	-	-	-	-	GO:0005575//cellular_component;GO:0005622//intracellular anatomical structure;GO:0005634//nucleus;GO:0043226//organelle;GO:0043227//membrane-bounded organelle;GO:0043229//intracellular organelle;GO:0043231//intracellular membrane-bounded organelle	GO:0000166//nucleotide binding;GO:0003674//molecular_function;GO:0003676//nucleic acid binding;GO:0003677//DNA binding;GO:0003824//catalytic activity;GO:0003904//deoxyribodipyrimidine photo-lyase activity;GO:0003913//DNA photolyase activity;GO:0005488//binding;GO:0016829//lyase activity;GO:0016830//carbon-carbon lyase activity;GO:0036094//small molecule binding;GO:0043167//ion binding;GO:0043168/…	GO:0000719//photoreactive repair;GO:0006139//nucleobase-containing compound metabolic process;GO:0006259//DNA metabolic process;GO:0006281//DNA repair;GO:0006290//pyrimidine dimer repair;GO:0006725//cellular aromatic compound metabolic process;GO:0006807//nitrogen compound metabolic process;GO:0006950//response to stress;GO:0006974//cellular response to DNA damage stimulus;GO:0008150//biological_…	--
Unigene0033468	2	5	2	6	1	35	29	19	17	17	0.22	0.47	0.19	0.46	0.08	2.46	1.56	1.74	1.38	1.28	0.284	1.684	2.567929304	0.00013832	0.001837827	--	-	-	-	-	-	-	-	-	--
Unigene0028981	6	9	8	6	9	78	80	42	31	60	0.51	0.67	0.61	0.36	0.6	4.33	3.4	3.03	1.99	3.55	0.55	3.26	2.567368441	3.40E-08	1.02E-06	tent5c	XP_045136858.1 terminal nucleotidyltransferase 5C-like isoform X3 [Portunus trituberculatus]	-	-	-	-	-	GO:1990817//RNA adenylyltransferase activity	-	--
Unigene0043467	11	4	4	12	5	51	77	50	23	71	1.29	0.41	0.42	0.99	0.46	3.89	4.49	4.95	2.02	5.76	0.714	4.222	2.563930599	1.01E-06	2.28E-05	ergic1	XP_045134322.1 endoplasmic reticulum-Golgi intermediate compartment protein 1-like isoform X2 [Portunus trituberculatus]	-	-	-	-	GO:0000139//Golgi membrane;GO:0005575//cellular_component;GO:0005622//intracellular anatomical structure;GO:0005634//nucleus;GO:0005654//nucleoplasm;GO:0005737//cytoplasm;GO:0005783//endoplasmic reticulum;GO:0005789//endoplasmic reticulum membrane;GO:0005793//endoplasmic reticulum-Golgi intermediate compartment;GO:0005794//Golgi apparatus;GO:0012505//endomembrane system;GO:0016020//membrane;GO:00…	-	GO:0006810//transport;GO:0006888//endoplasmic reticulum to Golgi vesicle-mediated transport;GO:0008150//biological_process;GO:0016192//vesicle-mediated transport;GO:0046907//intracellular transport;GO:0048193//Golgi vesicle transport;GO:0051179//localization;GO:0051234//establishment of localization;GO:0051641//cellular localization;GO:0051649//establishment of localization in cell	--
Unigene0037268	2	1	5	2	2	23	31	14	15	11	0.24	0.11	0.55	0.17	0.19	1.82	1.88	1.44	1.37	0.93	0.252	1.488	2.561878888	0.000556534	0.006145778	--	-	-	-	-	-	-	-	-	--
Unigene0001449	13	27	32	21	23	115	258	123	140	240	1.08	1.96	2.39	1.23	1.49	6.21	10.67	8.63	8.73	13.81	1.63	9.61	2.559664467	2.31E-12	1.39E-10	--	-	-	-	-	-	-	-	-	--
Unigene0034616	32	41	57	88	49	658	699	215	152	311	0.78	0.87	1.25	1.51	0.93	10.42	8.48	4.42	2.78	5.24	1.068	6.268	2.553093533	1.22E-09	4.68E-08	Hydr2	XP_045139112.1 abhydrolase domain-containing protein 2-like [Portunus trituberculatus]	-	-	-	-	-	-	-	--
Unigene0025770	107	81	79	92	80	631	981	586	668	450	10.91	7.24	7.23	6.63	6.36	41.86	49.85	50.52	51.15	31.8	7.674	45.036	2.553028026	8.02E-20	1.26E-17	Ttc9c	XP_045129887.1 tetratricopeptide repeat protein 9C-like isoform X2 [Portunus trituberculatus]	-	-	-	-	-	GO:0005515//protein binding	GO:0001501//skeletal system development;GO:0007275//multicellular organism development;GO:0008150//biological_process;GO:0032501//multicellular organismal process;GO:0032502//developmental process;GO:0048513//animal organ development;GO:0048731//system development;GO:0048856//anatomical structure development;GO:0060348//bone development	--
Unigene0007887	16	7	14	15	12	66	202	16	197	23	2.08	0.8	1.63	1.38	1.22	5.58	13.08	1.76	19.23	2.07	1.422	8.344	2.552817693	0.000442737	0.005052537	--	XP_045137027.1 uncharacterized protein LOC123519637 [Portunus trituberculatus]	-	-	-	-	GO:0005575//cellular_component;GO:0005576//extracellular region	GO:0003674//molecular_function	GO:0000902//cell morphogenesis;GO:0000904//cell morphogenesis involved in differentiation;GO:0001654//eye development;GO:0001746//Bolwig's organ morphogenesis;GO:0006928//movement of cell or subcellular component;GO:0006935//chemotaxis;GO:0007155//cell adhesion;GO:0007157//heterophilic cell-cell adhesion via plasma membrane cell adhesion molecules;GO:0007275//multicellular organism development;GO…	--
Unigene0035419	7	9	11	11	7	110	94	53	32	51	1.6	1.8	2.26	1.78	1.25	16.38	10.72	10.25	5.5	8.09	1.738	10.188	2.551370877	1.11E-07	3.03E-06	--	-	-	-	-	-	-	-	-	--
Unigene0040030	7	9	7	9	10	78	66	38	12	118	0.51	0.57	0.45	0.46	0.56	3.67	2.38	2.32	0.65	5.92	0.51	2.988	2.550610996	4.55E-05	0.000691438	--	-	-	-	-	-	-	-	-	--
Unigene0041767	3	3	3	3	3	28	33	21	16	14	0.32	0.28	0.29	0.23	0.25	1.97	1.77	1.92	1.3	1.05	0.274	1.602	2.547626349	0.00011237	0.001529623	--	-	-	-	-	-	-	-	-	--
Unigene0036708	4	7	1	11	2	29	41	33	33	39	0.47	0.72	0.11	0.92	0.18	2.22	2.41	3.29	2.92	3.19	0.48	2.806	2.547408698	9.82E-06	0.000178467	--	-	-	-	-	-	-	-	-	--
Unigene0018404	13	25	27	28	26	74	46	302	84	275	1.07	1.8	1.99	1.63	1.66	3.95	1.88	20.96	5.18	15.65	1.63	9.524	2.546695656	0.000109287	0.001491566	--	XP_045132154.1 uncharacterized protein LOC123516637 [Portunus trituberculatus]	-	-	-	-	-	-	-	--
Unigene0001772	21	19	10	29	20	159	220	115	94	149	0.97	0.77	0.41	0.95	0.72	4.77	5.05	4.48	3.25	4.76	0.764	4.462	2.54604597	1.76E-15	1.62E-13	--	-	-	-	-	-	-	-	-	--
Unigene0006202	51	71	65	136	71	851	926	470	245	416	1.21	1.47	1.38	2.28	1.31	13.12	10.93	9.42	4.36	6.83	1.53	8.932	2.545451598	1.66E-12	1.03E-10	NPC1	XP_045118227.1 NPC intracellular cholesterol transporter 1-like [Portunus trituberculatus]	Cellular Processes	Transport and catabolism	ko04142//Lysosome	K12385	GO:0000322//storage vacuole;GO:0000323//lytic vacuole;GO:0000324//fungal-type vacuole;GO:0000329//fungal-type vacuole membrane;GO:0005575//cellular_component;GO:0005576//extracellular region;GO:0005622//intracellular anatomical structure;GO:0005634//nucleus;GO:0005635//nuclear envelope;GO:0005737//cytoplasm;GO:0005764//lysosome;GO:0005765//lysosomal membrane;GO:0005768//endosome;GO:0005770//late …	GO:0001618//virus receptor activity;GO:0003674//molecular_function;GO:0004888//transmembrane signaling receptor activity;GO:0005215//transporter activity;GO:0005319//lipid transporter activity;GO:0005488//binding;GO:0005496//steroid binding;GO:0008289//lipid binding;GO:0015248//sterol transporter activity;GO:0015485//cholesterol binding;GO:0032934//sterol binding;GO:0036094//small molecule bindin…	GO:0000003//reproduction;GO:0002165//instar larval or pupal development;GO:0003006//developmental process involved in reproduction;GO:0006066//alcohol metabolic process;GO:0006082//organic acid metabolic process;GO:0006464//cellular protein modification process;GO:0006486//protein glycosylation;GO:0006629//lipid metabolic process;GO:0006643//membrane lipid metabolic process;GO:0006665//sphingolip…	--
Unigene0021747	97	69	110	74	67	721	681	586	487	618	8.06	5.02	8.2	4.35	4.34	38.97	28.19	41.16	30.38	35.58	5.994	34.856	2.539816029	1.31E-17	1.57E-15	--	-	-	-	-	-	-	-	-	--
Unigene0036631	2	12	7	9	7	62	88	35	20	70	0.11	0.59	0.35	0.36	0.31	2.27	2.47	1.67	0.85	2.73	0.344	1.998	2.538076113	4.02E-06	8.06E-05	--	KAG0723909.1 Zinc finger protein jing [Chionoecetes opilio]	-	-	-	-	-	-	-	--
Unigene0026739	313	315	280	489	270	3022	3471	1853	1502	2449	21.1	18.6	16.95	23.31	14.2	132.53	116.59	105.6	76.03	114.41	18.832	109.032	2.533493486	8.98E-33	3.63E-30	DNAJC7	XP_045119494.1 uncharacterized protein LOC123509333 [Portunus trituberculatus]	-	-	-	-	GO:0005575//cellular_component;GO:0005622//intracellular anatomical structure;GO:0005634//nucleus;GO:0005654//nucleoplasm;GO:0005737//cytoplasm;GO:0005829//cytosol;GO:0005856//cytoskeleton;GO:0031974//membrane-enclosed lumen;GO:0031981//nuclear lumen;GO:0043226//organelle;GO:0043227//membrane-bounded organelle;GO:0043228//non-membrane-bounded organelle;GO:0043229//intracellular organelle;GO:00432…	GO:0001671//ATPase activator activity;GO:0003674//molecular_function;GO:0005488//binding;GO:0005515//protein binding;GO:0008047//enzyme activator activity;GO:0030234//enzyme regulator activity;GO:0030544//Hsp70 protein binding;GO:0031072//heat shock protein binding;GO:0051082//unfolded protein binding;GO:0060589//nucleoside-triphosphatase regulator activity;GO:0060590//ATPase regulator activity;G…	GO:0006457//protein folding;GO:0006458//'de novo' protein folding;GO:0008150//biological_process;GO:0009408//response to heat;GO:0009987//cellular process;GO:0032781//positive regulation of ATPase activity;GO:0043085//positive regulation of catalytic activity;GO:0043462//regulation of ATPase activity;GO:0044093//positive regulation of molecular function;GO:0048583//regulation of response to stimu…	--
Unigene0027691	12	29	24	15	21	201	202	103	121	126	1.94	4.11	3.48	1.71	2.65	21.14	16.27	14.08	14.69	14.12	2.778	16.06	2.531353388	4.46E-12	2.56E-10	tma16	XP_045131171.1 translation machinery-associated protein 16-like [Portunus trituberculatus]	-	-	-	-	GO:0005575//cellular_component;GO:0005622//intracellular anatomical structure;GO:0005634//nucleus;GO:0005730//nucleolus;GO:0031974//membrane-enclosed lumen;GO:0031981//nuclear lumen;GO:0043226//organelle;GO:0043227//membrane-bounded organelle;GO:0043228//non-membrane-bounded organelle;GO:0043229//intracellular organelle;GO:0043231//intracellular membrane-bounded organelle;GO:0043232//intracellula…	-	-	--
Unigene0036227	1	3	3	5	1	44	11	17	13	5	0.11	0.28	0.29	0.38	0.08	3.05	0.58	1.53	1.04	0.37	0.228	1.314	2.526859546	0.00502151	0.039086156	--	-	-	-	-	-	-	-	-	--
Unigene0000504	7	10	3	9	10	77	29	51	39	73	1.05	1.31	0.4	0.95	1.17	7.51	2.17	6.46	4.39	7.59	0.976	5.624	2.526643542	7.95E-06	0.000148041	--	-	-	-	-	-	-	-	-	--
Unigene0031524	3	15	5	3	11	87	21	83	33	26	0.2	0.85	0.29	0.14	0.56	3.68	0.68	4.56	1.61	1.17	0.408	2.34	2.519867472	0.00105686	0.01057215	Ets21C	KAG0716449.1 DNA-binding protein D-ETS-6 [Chionoecetes opilio]	-	-	-	-	GO:0005575//cellular_component;GO:0005622//intracellular anatomical structure;GO:0005634//nucleus;GO:0043226//organelle;GO:0043227//membrane-bounded organelle;GO:0043229//intracellular organelle;GO:0043231//intracellular membrane-bounded organelle	GO:0000981//DNA-binding transcription factor activity, RNA polymerase II-specific;GO:0003674//molecular_function;GO:0003676//nucleic acid binding;GO:0003677//DNA binding;GO:0003700//DNA-binding transcription factor activity;GO:0005488//binding;GO:0043565//sequence-specific DNA binding;GO:0097159//organic cyclic compound binding;GO:0140110//transcription regulator activity;GO:1901363//heterocyclic…	GO:0006355//regulation of transcription, DNA-templated;GO:0006357//regulation of transcription by RNA polymerase II;GO:0006950//response to stress;GO:0006952//defense response;GO:0008150//biological_process;GO:0009605//response to external stimulus;GO:0009607//response to biotic stimulus;GO:0009617//response to bacterium;GO:0009889//regulation of biosynthetic process;GO:0010468//regulation of gen…	ETS
Unigene0028945	71	68	57	61	89	665	572	460	376	431	9.74	8.18	7.02	5.92	9.53	59.38	39.12	53.38	38.76	41	8.078	46.328	2.519814351	7.36E-17	8.03E-15	SEC61B	XP_045119537.1 protein transport protein Sec61 subunit beta-like [Portunus trituberculatus]	Genetic Information Processing;Cellular Processes;Genetic Information Processing	Folding, sorting and degradation;Transport and catabolism;Folding, sorting and degradation	ko04141//Protein processing in endoplasmic reticulum;ko04145//Phagosome;ko03060//Protein export	K09481;K09481;K09481	-	-	-	--
Unigene0024361	2	1	7	3	2	7	81	7	14	18	0.28	0.12	0.87	0.3	0.22	0.63	5.61	0.82	1.46	1.74	0.358	2.052	2.518999238	0.006207509	0.046605549	--	XP_042215908.1 uncharacterized protein LOC121862043 [Homarus americanus]	-	-	-	-	-	GO:0046983//protein dimerization activity	-	--
Unigene0009451	33	47	47	53	46	399	353	189	367	311	1.39	1.74	1.78	1.58	1.51	10.95	7.42	6.74	11.63	9.09	1.6	9.166	2.518220381	1.87E-18	2.56E-16	GPR143	XP_045123210.1 G-protein coupled receptor 143-like [Portunus trituberculatus]	-	-	-	-	GO:0000323//lytic vacuole;GO:0005575//cellular_component;GO:0005622//intracellular anatomical structure;GO:0005737//cytoplasm;GO:0005764//lysosome;GO:0005765//lysosomal membrane;GO:0005773//vacuole;GO:0005774//vacuolar membrane;GO:0005794//Golgi apparatus;GO:0005886//plasma membrane;GO:0012505//endomembrane system;GO:0012506//vesicle membrane;GO:0016020//membrane;GO:0016021//integral component of…	GO:0001653//peptide receptor activity;GO:0003674//molecular_function;GO:0004888//transmembrane signaling receptor activity;GO:0004930//G protein-coupled receptor activity;GO:0005488//binding;GO:0008188//neuropeptide receptor activity;GO:0008528//G protein-coupled peptide receptor activity;GO:0016597//amino acid binding;GO:0031406//carboxylic acid binding;GO:0035240//dopamine binding;GO:0035643//L…	GO:0003008//system process;GO:0006726//eye pigment biosynthetic process;GO:0006810//transport;GO:0006996//organelle organization;GO:0007154//cell communication;GO:0007165//signal transduction;GO:0007186//G protein-coupled receptor signaling pathway;GO:0007218//neuropeptide signaling pathway;GO:0007600//sensory perception;GO:0007601//visual perception;GO:0008150//biological_process;GO:0008152//met…	--
Unigene0046960	7	6	7	9	9	26	59	11	20	162	0.58	0.44	0.52	0.53	0.58	1.4	2.44	0.77	1.25	9.32	0.53	3.036	2.518107526	0.001260759	0.012241228	--	-	-	-	-	-	-	-	-	--
Unigene0029277	81	239	42	85	74	2011	508	431	345	532	11.94	30.88	5.56	8.86	8.51	192.96	37.33	53.74	38.21	54.38	13.15	75.324	2.518046815	4.46E-05	0.000679868	--	-	-	-	-	-	-	-	-	--
Unigene0044380	468	661	478	699	625	5414	5043	3618	3779	3033	33.97	42.04	31.15	35.88	35.4	255.7	182.42	222.04	206.02	152.6	35.688	203.756	2.513331585	4.96E-26	1.31E-23	ASHR2	XP_045126743.1 SET domain-containing protein SmydA-8-like isoform X2 [Portunus trituberculatus]	-	-	-	-	-	GO:0003674//molecular_function;GO:0005488//binding;GO:0005515//protein binding;GO:0019899//enzyme binding;GO:0042826//histone deacetylase binding	GO:0008150//biological_process;GO:0009892//negative regulation of metabolic process;GO:0010468//regulation of gene expression;GO:0010605//negative regulation of macromolecule metabolic process;GO:0010629//negative regulation of gene expression;GO:0019222//regulation of metabolic process;GO:0048519//negative regulation of biological process;GO:0050789//regulation of biological process;GO:0060255//…	--
Unigene0038500	213	263	284	435	326	2630	2867	2800	857	1482	14.84	16.06	17.77	21.43	17.72	119.24	99.55	164.96	44.85	71.58	17.564	100.036	2.509825932	1.57E-11	8.24E-10	Fhod3	XP_045125657.1 LOW QUALITY PROTEIN: uncharacterized protein LOC123512971 [Portunus trituberculatus]	-	-	-	-	GO:0005575//cellular_component;GO:0005622//intracellular anatomical structure;GO:0005634//nucleus;GO:0005737//cytoplasm;GO:0043226//organelle;GO:0043227//membrane-bounded organelle;GO:0043229//intracellular organelle;GO:0043231//intracellular membrane-bounded organelle;GO:0048471//perinuclear region of cytoplasm	GO:0003674//molecular_function;GO:0003779//actin binding;GO:0005488//binding;GO:0005515//protein binding;GO:0008092//cytoskeletal protein binding	GO:0002009//morphogenesis of an epithelium;GO:0002011//morphogenesis of an epithelial sheet;GO:0002165//instar larval or pupal development;GO:0003008//system process;GO:0003012//muscle system process;GO:0006928//movement of cell or subcellular component;GO:0006950//response to stress;GO:0007275//multicellular organism development;GO:0007431//salivary gland development;GO:0007435//salivary gland m…	--
Unigene0030117	214	249	257	372	212	2196	2146	1589	1599	1690	5.95	6.07	6.42	7.31	4.6	39.73	29.74	37.36	33.39	32.57	6.07	34.558	2.509251304	4.12E-42	3.58E-39	PLOD1	XP_045137293.1 procollagen-lysine,2-oxoglutarate 5-dioxygenase 1-like isoform X2 [Portunus trituberculatus]	Metabolism;Metabolism;Metabolism	Global and overview maps;Amino acid metabolism;Glycan biosynthesis and metabolism	ko01100//Metabolic pathways;ko00310//Lysine degradation;ko00514//Other types of O-glycan biosynthesis	K13646;K13646;K13646	GO:0005575//cellular_component;GO:0005576//extracellular region;GO:0005615//extracellular space;GO:0005622//intracellular anatomical structure;GO:0005737//cytoplasm;GO:0005783//endoplasmic reticulum;GO:0005789//endoplasmic reticulum membrane;GO:0005791//rough endoplasmic reticulum;GO:0012505//endomembrane system;GO:0016020//membrane;GO:0030867//rough endoplasmic reticulum membrane;GO:0031090//org…	GO:0003674//molecular_function;GO:0003824//catalytic activity;GO:0003980//UDP-glucose:glycoprotein glucosyltransferase activity;GO:0005488//binding;GO:0005506//iron ion binding;GO:0008194//UDP-glycosyltransferase activity;GO:0008475//procollagen-lysine 5-dioxygenase activity;GO:0016491//oxidoreductase activity;GO:0016705//oxidoreductase activity, acting on paired donors, with incorporation or red…	GO:0000003//reproduction;GO:0003006//developmental process involved in reproduction;GO:0006011//UDP-glucose metabolic process;GO:0006139//nucleobase-containing compound metabolic process;GO:0006464//cellular protein modification process;GO:0006486//protein glycosylation;GO:0006725//cellular aromatic compound metabolic process;GO:0006793//phosphorus metabolic process;GO:0006807//nitrogen compound …	--
Unigene0028967	0	5	2	3	5	14	10	21	20	33	0	0.4	0.17	0.2	0.36	0.84	0.46	1.64	1.38	2.11	0.226	1.286	2.508495965	0.002651363	0.022970022	--	XP_045103360.1 cell wall integrity and stress response component 4-like [Portunus trituberculatus]	-	-	-	-	GO:0016021//integral component of membrane	GO:0008375//acetylglucosaminyltransferase activity	GO:0000271//polysaccharide biosynthetic process;GO:0042710//biofilm formation	--
Unigene0021591	6	5	10	8	5	56	78	23	88	5	1.4	1.02	2.09	1.32	0.91	8.5	9.07	4.54	15.42	0.81	1.348	7.668	2.50802984	0.000785006	0.008215743	--	-	-	-	-	-	-	-	-	--
Unigene0001172	12	4	8	4	0	43	38	22	72	37	1.01	0.3	0.6	0.24	0	2.36	1.59	1.57	4.55	2.16	0.43	2.446	2.508015839	0.000423503	0.004858523	--	-	-	-	-	-	-	-	-	--
Unigene0035789	5	11	5	19	5	44	103	28	59	87	0.29	0.55	0.26	0.77	0.22	1.63	2.93	1.35	2.53	3.44	0.418	2.376	2.506959989	8.92E-07	2.04E-05	TpnC73F	XP_045114717.1 troponin C-like isoform X1 [Portunus trituberculatus]	-	-	-	-	-	GO:0003674//molecular_function;GO:0005488//binding;GO:0005509//calcium ion binding;GO:0005515//protein binding;GO:0043167//ion binding;GO:0043169//cation binding;GO:0046872//metal ion binding	GO:0003008//system process;GO:0007600//sensory perception;GO:0008150//biological_process;GO:0019233//sensory perception of pain;GO:0032501//multicellular organismal process;GO:0050877//nervous system process	--
Unigene0000555	300	366	415	710	458	3467	4089	2483	2230	3543	14.13	15.11	17.55	23.65	16.83	106.26	95.99	98.89	78.89	115.68	17.454	99.142	2.50593866	9.95E-36	4.82E-33	RCN2	XP_042855804.1 reticulocalbin-2-like isoform X3 [Penaeus japonicus]	-	-	-	-	GO:0005575//cellular_component;GO:0005622//intracellular anatomical structure;GO:0005634//nucleus;GO:0005730//nucleolus;GO:0005737//cytoplasm;GO:0005783//endoplasmic reticulum;GO:0005788//endoplasmic reticulum lumen;GO:0012505//endomembrane system;GO:0031974//membrane-enclosed lumen;GO:0031981//nuclear lumen;GO:0043226//organelle;GO:0043227//membrane-bounded organelle;GO:0043228//non-membrane-bou…	GO:0003674//molecular_function;GO:0005488//binding;GO:0005509//calcium ion binding;GO:0043167//ion binding;GO:0043169//cation binding;GO:0046872//metal ion binding	GO:0006996//organelle organization;GO:0007030//Golgi organization;GO:0008150//biological_process;GO:0009987//cellular process;GO:0010256//endomembrane system organization;GO:0016043//cellular component organization;GO:0071840//cellular component organization or biogenesis	--
Unigene0014764	13	10	25	14	13	53	140	75	148	123	0.84	0.56	1.44	0.64	0.65	2.22	4.49	4.08	7.15	5.49	0.826	4.686	2.504143267	1.11E-07	3.02E-06	--	-	-	-	-	-	-	-	-	--
Unigene0008156	6	2	1	2	3	20	33	14	19	22	0.51	0.15	0.08	0.12	0.2	1.1	1.39	1	1.21	1.29	0.212	1.198	2.498491738	0.000208822	0.002624711	KDM8	XP_045137895.1 bifunctional peptidase and arginyl-hydroxylase JMJD5-like isoform X1 [Portunus trituberculatus]	-	-	-	-	GO:0005575//cellular_component;GO:0005622//intracellular anatomical structure;GO:0005634//nucleus;GO:0005654//nucleoplasm;GO:0005694//chromosome;GO:0005737//cytoplasm;GO:0005829//cytosol;GO:0031974//membrane-enclosed lumen;GO:0031981//nuclear lumen;GO:0043226//organelle;GO:0043227//membrane-bounded organelle;GO:0043228//non-membrane-bounded organelle;GO:0043229//intracellular organelle;GO:0043231…	GO:0003674//molecular_function;GO:0003682//chromatin binding;GO:0003824//catalytic activity;GO:0005488//binding;GO:0008080//N-acetyltransferase activity;GO:0008233//peptidase activity;GO:0016407//acetyltransferase activity;GO:0016410//N-acyltransferase activity;GO:0016491//oxidoreductase activity;GO:0016705//oxidoreductase activity, acting on paired donors, with incorporation or reduction of mole…	GO:0000086//G2/M transition of mitotic cell cycle;GO:0000278//mitotic cell cycle;GO:0006139//nucleobase-containing compound metabolic process;GO:0006325//chromatin organization;GO:0006351//transcription, DNA-templated;GO:0006355//regulation of transcription, DNA-templated;GO:0006464//cellular protein modification process;GO:0006482//protein demethylation;GO:0006508//proteolysis;GO:0006725//cellul…	--
Unigene0019952	4	13	1	10	10	42	22	60	38	85	0.45	1.27	0.1	0.79	0.87	3.04	1.22	5.65	3.18	6.56	0.696	3.93	2.497370101	0.000288766	0.003485439	Inx3	XP_045116951.1 innexin inx2-like [Portunus trituberculatus]	-	-	-	-	GO:0005575//cellular_component;GO:0005886//plasma membrane;GO:0005911//cell-cell junction;GO:0005921//gap junction;GO:0016020//membrane;GO:0016021//integral component of membrane;GO:0016328//lateral plasma membrane;GO:0030054//cell junction;GO:0031224//intrinsic component of membrane;GO:0071944//cell periphery	GO:0003674//molecular_function;GO:0005215//transporter activity;GO:0005243//gap junction channel activity;GO:0015267//channel activity;GO:0022803//passive transmembrane transporter activity;GO:0022829//wide pore channel activity;GO:0022857//transmembrane transporter activity;GO:0055077//gap junction hemi-channel activity	GO:0001700//embryonic development via the syncytial blastoderm;GO:0002009//morphogenesis of an epithelium;GO:0006810//transport;GO:0006811//ion transport;GO:0007154//cell communication;GO:0007165//signal transduction;GO:0007275//multicellular organism development;GO:0007391//dorsal closure;GO:0007602//phototransduction;GO:0007603//phototransduction, visible light;GO:0008150//biological_process;GO…	--
Unigene0020504	13	8	14	5	7	102	66	73	65	36	3.3	1.78	3.2	0.9	1.39	16.87	8.36	15.69	12.41	6.34	2.114	11.934	2.4970304	3.95E-06	7.94E-05	--	-	-	-	-	-	-	-	-	--
Unigene0042935	9	1	1	4	3	20	19	28	14	47	0.66	0.06	0.07	0.21	0.17	0.96	0.7	1.75	0.78	2.41	0.234	1.32	2.495957495	0.001568496	0.014774792	Nep4	XP_045138122.1 membrane metallo-endopeptidase-like 1 isoform X1 [Portunus trituberculatus]	-	-	-	-	-	GO:0004222//metalloendopeptidase activity	GO:0006508//proteolysis	--
Unigene0035097	49	77	102	76	103	739	739	487	523	394	6.74	9.28	12.59	7.39	11.05	66.11	50.64	56.62	54.01	37.55	9.41	52.986	2.493344592	1.09E-14	9.06E-13	--	XP_045136376.1 translocon-associated protein subunit delta-like [Portunus trituberculatus]	Genetic Information Processing	Folding, sorting and degradation	ko04141//Protein processing in endoplasmic reticulum	K04571	GO:0005575//cellular_component;GO:0005622//intracellular anatomical structure;GO:0005737//cytoplasm;GO:0005783//endoplasmic reticulum;GO:0005784//Sec61 translocon complex;GO:0005789//endoplasmic reticulum membrane;GO:0005791//rough endoplasmic reticulum;GO:0012505//endomembrane system;GO:0016020//membrane;GO:0016021//integral component of membrane;GO:0030867//rough endoplasmic reticulum membrane;…	GO:0003674//molecular_function;GO:0005488//binding;GO:0005515//protein binding;GO:0046873//metal ion transmembrane transporter activity	GO:0030001//metal ion transport;GO:0055085//transmembrane transport	--
Unigene0000602	140	74	53	98	65	128	310	1421	325	593	4.95	2.29	1.68	2.45	1.79	2.94	5.46	42.46	8.63	14.53	2.632	14.804	2.491755647	0.003049063	0.025756575	Jmjd8	XP_037793167.1 jmjC domain-containing protein 8-like [Penaeus monodon]	-	-	-	-	-	-	-	--
Unigene0034182	1	1	4	4	3	9	32	12	19	19	0.16	0.14	0.57	0.45	0.37	0.94	2.55	1.62	2.28	2.11	0.338	1.9	2.490904267	0.001207823	0.011823874	--	-	-	-	-	-	GO:0005666//RNA polymerase III complex	GO:0003677//DNA binding	GO:0006383//transcription by RNA polymerase III	--
Unigene0005658	43	68	53	85	76	556	719	349	233	468	2.02	2.79	2.23	2.82	2.78	16.97	16.81	13.84	8.21	15.22	2.528	14.21	2.490838186	2.12E-17	2.50E-15	Hyou1	XP_045598067.1 hypoxia up-regulated protein 1-like isoform X3 [Procambarus clarkii]	Genetic Information Processing	Folding, sorting and degradation	ko04141//Protein processing in endoplasmic reticulum	K09486	GO:0005575//cellular_component;GO:0005576//extracellular region;GO:0005615//extracellular space;GO:0005622//intracellular anatomical structure;GO:0005737//cytoplasm;GO:0005773//vacuole;GO:0005774//vacuolar membrane;GO:0005783//endoplasmic reticulum;GO:0005788//endoplasmic reticulum lumen;GO:0005790//smooth endoplasmic reticulum;GO:0005794//Golgi apparatus;GO:0009507//chloroplast;GO:0009536//plast…	GO:0000166//nucleotide binding;GO:0000774//adenyl-nucleotide exchange factor activity;GO:0003674//molecular_function;GO:0003824//catalytic activity;GO:0005488//binding;GO:0005515//protein binding;GO:0005524//ATP binding;GO:0016462//pyrophosphatase activity;GO:0016787//hydrolase activity;GO:0016817//hydrolase activity, acting on acid anhydrides;GO:0016818//hydrolase activity, acting on acid anhydr…	GO:0000003//reproduction;GO:0001666//response to hypoxia;GO:0002931//response to ischemia;GO:0006457//protein folding;GO:0006605//protein targeting;GO:0006612//protein targeting to membrane;GO:0006620//posttranslational protein targeting to endoplasmic reticulum membrane;GO:0006810//transport;GO:0006886//intracellular protein transport;GO:0006888//endoplasmic reticulum to Golgi vesicle-mediated t…	--
Unigene0038549	18	10	15	28	10	116	194	67	94	117	1.17	0.57	0.88	1.29	0.51	4.92	6.3	3.69	4.6	5.28	0.884	4.958	2.487639997	4.09E-12	2.35E-10	--	-	-	-	-	-	-	GO:0016151//nickel cation binding	GO:0051604//protein maturation	zf-C2H2
Unigene0003446	422	411	424	524	393	3769	4707	2254	2235	2791	10.69	9.12	9.64	9.38	7.77	62.1	59.4	48.26	42.51	48.99	9.32	52.252	2.487084399	3.50E-38	2.08E-35	pit	XP_045135392.1 ATP-dependent RNA helicase HAS1-like [Portunus trituberculatus]	-	-	-	-	-	GO:0003676//nucleic acid binding;GO:0003690//double-stranded DNA binding;GO:0004386//helicase activity;GO:0005515//protein binding;GO:0005524//ATP binding;GO:0016887//ATP hydrolysis activity	GO:0006139//nucleobase-containing compound metabolic process;GO:0006268//DNA unwinding involved in DNA replication;GO:0006281//DNA repair;GO:0006310//DNA recombination	--
Unigene0022062	1	3	3	4	1	26	34	11	12	5	0.09	0.25	0.26	0.27	0.07	1.6	1.61	0.88	0.85	0.33	0.188	1.054	2.4870703	0.002984776	0.025326516	RDH13	XP_045135874.1 retinol dehydrogenase 11-like isoform X1 [Portunus trituberculatus]	Metabolism;Metabolism	Global and overview maps;Metabolism of cofactors and vitamins	ko01100//Metabolic pathways;ko00830//Retinol metabolism	K11153;K11153	-	GO:0003824//catalytic activity;GO:0004316//3-oxoacyl-[acyl-carrier-protein] reductase (NADPH) activity;GO:0004757//sepiapterin reductase activity;GO:0008667//2,3-dihydro-2,3-dihydroxybenzoate dehydrogenase activity;GO:0008678//2-deoxy-D-gluconate 3-dehydrogenase activity;GO:0016491//oxidoreductase activity;GO:0016630//protochlorophyllide reductase activity;GO:0051287//NAD binding	GO:0000272//polysaccharide catabolic process;GO:0006633//fatty acid biosynthetic process;GO:0006729//tetrahydrobiopterin biosynthetic process;GO:0015995//chlorophyll biosynthetic process	--
Unigene0047169	6	20	22	39	23	137	149	111	160	169	0.22	0.64	0.72	1.01	0.66	3.27	2.72	3.44	4.41	4.3	0.65	3.628	2.480662833	7.81E-11	3.65E-09	MPPED1	XP_045116332.1 metallophosphoesterase MPPED2-like [Portunus trituberculatus]	-	-	-	-	-	GO:0003674//molecular_function;GO:0003824//catalytic activity;GO:0004488//methylenetetrahydrofolate dehydrogenase (NADP+) activity;GO:0005488//binding;GO:0005515//protein binding;GO:0016787//hydrolase activity	-	--
Unigene0013002	2	0	4	4	1	15	26	16	4	17	0.28	0	0.51	0.4	0.11	1.39	1.84	1.92	0.43	1.67	0.26	1.45	2.479469372	0.00483123	0.037812864	--	-	-	-	-	-	-	-	-	--
Unigene0039888	94	91	117	115	114	806	746	614	455	1073	7.58	6.43	8.47	6.55	7.17	42.27	29.97	41.85	27.55	59.95	7.24	40.318	2.477362472	4.88E-18	6.30E-16	Fib	KAG0711657.1 rRNA 2'-O-methyltransferase fibrillarin [Chionoecetes opilio]	Genetic Information Processing	Translation	ko03008//Ribosome biogenesis in eukaryotes	K14563	GO:0001650//fibrillar center;GO:0001651//dense fibrillar component;GO:0001652//granular component;GO:0005575//cellular_component;GO:0005622//intracellular anatomical structure;GO:0005634//nucleus;GO:0005654//nucleoplasm;GO:0005694//chromosome;GO:0005730//nucleolus;GO:0005732//sno(s)RNA-containing ribonucleoprotein complex;GO:0015030//Cajal body;GO:0016604//nuclear body;GO:0030532//small nuclear r…	GO:0001091//RNA polymerase II general transcription initiation factor binding;GO:0001094//TFIID-class transcription factor complex binding;GO:0001098//basal transcription machinery binding;GO:0001099//basal RNA polymerase II transcription machinery binding;GO:0003674//molecular_function;GO:0003676//nucleic acid binding;GO:0003723//RNA binding;GO:0003729//mRNA binding;GO:0003824//catalytic activit…	GO:0000154//rRNA modification;GO:0000494//box C/D RNA 3'-end processing;GO:0001510//RNA methylation;GO:0006139//nucleobase-containing compound metabolic process;GO:0006325//chromatin organization;GO:0006355//regulation of transcription, DNA-templated;GO:0006356//regulation of transcription by RNA polymerase I;GO:0006364//rRNA processing;GO:0006396//RNA processing;GO:0006399//tRNA metabolic proces…	--
Unigene0016258	141	119	140	167	144	1146	1324	763	919	872	27.88	20.62	24.86	23.35	22.22	147.47	130.49	127.59	136.51	119.54	23.786	132.32	2.475846555	2.09E-35	1.00E-32	--	-	-	-	-	-	-	-	-	--
Unigene0044477	16	6	12	7	17	107	111	71	54	77	2.13	0.7	1.43	0.66	1.76	9.26	7.35	7.98	5.39	7.1	1.336	7.416	2.472721236	6.93E-08	1.97E-06	MCFD2	XP_045112081.1 adenylate cyclase, terminal-differentiation specific-like [Portunus trituberculatus]	-	-	-	-	GO:0000139//Golgi membrane;GO:0005575//cellular_component;GO:0005576//extracellular region;GO:0005615//extracellular space;GO:0005622//intracellular anatomical structure;GO:0005672//transcription factor TFIIA complex;GO:0005737//cytoplasm;GO:0005783//endoplasmic reticulum;GO:0005789//endoplasmic reticulum membrane;GO:0005793//endoplasmic reticulum-Golgi intermediate compartment;GO:0005794//Golgi …	GO:0003674//molecular_function;GO:0005488//binding;GO:0005509//calcium ion binding;GO:0043167//ion binding;GO:0043169//cation binding;GO:0046872//metal ion binding	GO:0000003//reproduction;GO:0006082//organic acid metabolic process;GO:0006367//transcription initiation from RNA polymerase II promoter;GO:0006810//transport;GO:0006888//endoplasmic reticulum to Golgi vesicle-mediated transport;GO:0006900//vesicle budding from membrane;GO:0006901//vesicle coating;GO:0006903//vesicle targeting;GO:0006996//organelle organization;GO:0007275//multicellular organism …	--
Unigene0043829	20	25	18	33	25	199	255	121	136	143	1.99	2.18	1.61	2.32	1.94	12.88	12.64	10.18	10.16	9.86	2.008	11.144	2.472435989	4.95E-18	6.37E-16	GTF2H3	XP_045113682.1 general transcription factor IIH subunit 3-like [Portunus trituberculatus]	Genetic Information Processing;Genetic Information Processing	Transcription;Replication and repair	ko03022//Basal transcription factors;ko03420//Nucleotide excision repair	K03143;K03143	GO:0000109//nucleotide-excision repair complex;GO:0000112//nucleotide-excision repair factor 3 complex;GO:0000428//DNA-directed RNA polymerase complex;GO:0000438//core TFIIH complex portion of holo TFIIH complex;GO:0000439//transcription factor TFIIH core complex;GO:0005575//cellular_component;GO:0005622//intracellular anatomical structure;GO:0005634//nucleus;GO:0005654//nucleoplasm;GO:0005667//t…	GO:0003674//molecular_function;GO:0003676//nucleic acid binding;GO:0003677//DNA binding;GO:0003684//damaged DNA binding;GO:0003700//DNA-binding transcription factor activity;GO:0003723//RNA binding;GO:0003824//catalytic activity;GO:0004672//protein kinase activity;GO:0004674//protein serine/threonine kinase activity;GO:0005488//binding;GO:0005515//protein binding;GO:0008094//ATP-dependent activit…	GO:0001109//promoter clearance during DNA-templated transcription;GO:0001111//promoter clearance from RNA polymerase II promoter;GO:0001112//DNA-templated transcription open complex formation;GO:0001113//transcription open complex formation at RNA polymerase II promoter;GO:0001120//protein-DNA complex remodeling;GO:0006139//nucleobase-containing compound metabolic process;GO:0006259//DNA metaboli…	--
Unigene0001597	21	52	68	49	44	635	254	381	145	174	0.66	1.43	1.91	1.09	1.08	12.95	3.97	10.1	3.41	3.78	1.234	6.842	2.47107571	2.06E-06	4.38E-05	uprt	XP_045123497.1 uracil phosphoribosyltransferase homolog isoform X2 [Portunus trituberculatus]	-	-	-	-	-	GO:0004749//ribose phosphate diphosphokinase activity;GO:0004845//uracil phosphoribosyltransferase activity	GO:0008655//pyrimidine-containing compound salvage;GO:0009116//nucleoside metabolic process;GO:0009152//purine ribonucleotide biosynthetic process	--
Unigene0001374	6	2	9	0	1	39	49	20	7	29	1.26	0.37	1.69	0	0.16	5.32	5.12	3.54	1.1	4.21	0.696	3.858	2.470693932	0.004385902	0.034931239	--	-	-	-	-	-	-	-	-	--
Unigene0045964	2	0	9	12	4	37	70	20	14	49	0.22	0	0.88	0.92	0.34	2.61	3.79	1.84	1.14	3.69	0.472	2.614	2.469400376	0.000712428	0.007558706	--	-	-	-	-	-	-	-	-	--
Unigene0001437	12	11	29	44	22	295	208	180	31	89	0.4	0.32	0.86	1.02	0.57	6.32	3.41	5.01	0.77	2.03	0.634	3.508	2.468094002	4.32E-05	0.000659702	--	-	-	-	-	-	-	-	-	--
Unigene0001694	35	53	61	75	39	291	501	335	215	474	2.81	3.73	4.4	4.26	2.44	15.2	20.05	22.74	12.97	26.38	3.528	19.468	2.464182214	5.53E-17	6.19E-15	--	-	-	-	-	-	-	-	GO:0001522//pseudouridine synthesis;GO:0042254//ribosome biogenesis	--
Unigene0017926	354	368	345	556	408	4270	3609	2073	1687	2551	9.71	8.85	8.5	10.79	8.74	76.24	49.36	48.1	34.77	48.52	9.318	51.398	2.463619987	1.13E-21	2.05E-19	SEC24C	XP_045102182.1 protein transport protein Sec24C-like [Portunus trituberculatus]	Genetic Information Processing	Folding, sorting and degradation	ko04141//Protein processing in endoplasmic reticulum	K14007	GO:0030127//COPII vesicle coat	GO:0008270//zinc ion binding	GO:0006886//intracellular protein transport;GO:0006888//endoplasmic reticulum to Golgi vesicle-mediated transport	--
Unigene0015496	3	35	14	3	19	40	203	78	133	81	0.25	2.58	1.06	0.18	1.25	2.19	8.5	5.54	8.39	4.72	1.064	5.868	2.46337072	0.000672378	0.00720536	--	KAG0727180.1 hypothetical protein GWK47_035175 [Chionoecetes opilio]	-	-	-	-	GO:0000315//organellar large ribosomal subunit;GO:0000795//synaptonemal complex;GO:0022625//cytosolic large ribosomal subunit	GO:0003735//structural constituent of ribosome;GO:0005524//ATP binding	GO:0006412//translation;GO:0007059//chromosome segregation;GO:0007130//synaptonemal complex assembly;GO:0016032//viral process;GO:0030261//chromosome condensation;GO:0070193//synaptonemal complex organization	--
Unigene0004259	11	5	5	8	19	81	120	32	49	65	0.71	0.28	0.29	0.37	0.96	3.41	3.87	1.75	2.38	2.92	0.522	2.866	2.456916898	4.41E-06	8.77E-05	Galk2	KAG0722948.1 N-acetylgalactosamine kinase [Chionoecetes opilio]	Metabolism;Metabolism	Global and overview maps;Carbohydrate metabolism	ko01100//Metabolic pathways;ko00520//Amino sugar and nucleotide sugar metabolism	K18674;K18674	GO:0005575//cellular_component;GO:0005576//extracellular region;GO:0005615//extracellular space;GO:0005622//intracellular anatomical structure;GO:0005737//cytoplasm;GO:0016020//membrane;GO:0031982//vesicle;GO:0043226//organelle;GO:0043227//membrane-bounded organelle;GO:0043230//extracellular organelle;GO:0070062//extracellular exosome;GO:1903561//extracellular vesicle	GO:0000166//nucleotide binding;GO:0003674//molecular_function;GO:0003824//catalytic activity;GO:0004335//galactokinase activity;GO:0004413//homoserine kinase activity;GO:0004496//mevalonate kinase activity;GO:0004765//shikimate kinase activity;GO:0005102//signaling receptor binding;GO:0005104//fibroblast growth factor receptor binding;GO:0005488//binding;GO:0005515//protein binding;GO:0005524//AT…	GO:0005975//carbohydrate metabolic process;GO:0005996//monosaccharide metabolic process;GO:0006012//galactose metabolic process;GO:0006793//phosphorus metabolic process;GO:0006796//phosphate-containing compound metabolic process;GO:0007154//cell communication;GO:0007165//signal transduction;GO:0007166//cell surface receptor signaling pathway;GO:0007167//enzyme linked receptor protein signaling pa…	--
Unigene0047203	45	48	43	66	53	682	534	273	149	174	5.47	5.12	4.7	5.68	5.03	53.97	32.37	28.07	13.61	14.67	5.2	28.538	2.456300703	3.10E-08	9.37E-07	--	-	-	-	-	-	-	-	-	--
Unigene0006152	4	2	2	1	2	8	27	14	13	20	0.82	0.36	0.37	0.14	0.32	1.06	2.74	2.41	1.99	2.83	0.402	2.206	2.456165384	0.001606411	0.015081684	--	-	-	-	-	-	-	-	-	--
Unigene0030866	16	10	15	29	28	119	138	118	138	134	1.22	0.67	1.03	1.56	1.66	5.89	5.23	7.59	7.89	7.07	1.228	6.734	2.45515316	2.25E-11	1.15E-09	--	XP_045139428.1 uncharacterized protein LOC123520851 [Portunus trituberculatus]	-	-	-	-	-	GO:0003677//DNA binding	-	--
Unigene0027372	7	15	6	8	16	64	63	59	83	78	0.98	1.84	0.75	0.79	1.74	5.82	4.39	6.97	8.71	7.56	1.22	6.69	2.455125063	2.38E-07	6.06E-06	Nr2c2ap	KAG0713769.1 Nuclear receptor 2C2-associated protein [Chionoecetes opilio]	-	-	-	-	GO:0005575//cellular_component;GO:0005622//intracellular anatomical structure;GO:0005634//nucleus;GO:0005654//nucleoplasm;GO:0031974//membrane-enclosed lumen;GO:0031981//nuclear lumen;GO:0043226//organelle;GO:0043227//membrane-bounded organelle;GO:0043229//intracellular organelle;GO:0043231//intracellular membrane-bounded organelle;GO:0043233//organelle lumen;GO:0070013//intracellular organelle l…	GO:0003674//molecular_function	GO:0006139//nucleobase-containing compound metabolic process;GO:0006351//transcription, DNA-templated;GO:0006352//DNA-templated transcription, initiation;GO:0006366//transcription by RNA polymerase II;GO:0006367//transcription initiation from RNA polymerase II promoter;GO:0006725//cellular aromatic compound metabolic process;GO:0006807//nitrogen compound metabolic process;GO:0008150//biological_p…	--
Unigene0018222	79	87	117	201	115	910	1168	784	535	659	5.53	5.34	7.36	9.96	6.29	41.48	40.77	46.43	28.15	32	6.896	37.766	2.453256309	1.10E-19	1.72E-17	GA21225	XP_045102389.1 LOW QUALITY PROTEIN: zinc finger CCCH domain-containing protein 15 homolog [Portunus trituberculatus]	-	-	-	-	GO:0005575//cellular_component;GO:0005622//intracellular anatomical structure;GO:0005634//nucleus;GO:0005730//nucleolus;GO:0005737//cytoplasm;GO:0005829//cytosol;GO:0031974//membrane-enclosed lumen;GO:0031981//nuclear lumen;GO:0043226//organelle;GO:0043227//membrane-bounded organelle;GO:0043228//non-membrane-bounded organelle;GO:0043229//intracellular organelle;GO:0043231//intracellular membrane-…	GO:0000981//DNA-binding transcription factor activity, RNA polymerase II-specific;GO:0003674//molecular_function;GO:0003676//nucleic acid binding;GO:0003677//DNA binding;GO:0003700//DNA-binding transcription factor activity;GO:0003723//RNA binding;GO:0003729//mRNA binding;GO:0005488//binding;GO:0043167//ion binding;GO:0043169//cation binding;GO:0046872//metal ion binding;GO:0097159//organic cycli…	GO:0002181//cytoplasmic translation;GO:0006355//regulation of transcription, DNA-templated;GO:0006357//regulation of transcription by RNA polymerase II;GO:0006403//RNA localization;GO:0006405//RNA export from nucleus;GO:0006406//mRNA export from nucleus;GO:0006412//translation;GO:0006518//peptide metabolic process;GO:0006611//protein export from nucleus;GO:0006807//nitrogen compound metabolic pro…	--
Unigene0044838	7	10	12	4	5	46	59	52	21	91	0.78	0.98	1.2	0.32	0.44	3.35	3.29	4.92	1.76	7.05	0.744	4.074	2.453071454	2.58E-05	0.000420809	--	-	-	-	-	-	-	GO:0004731//purine-nucleoside phosphorylase activity	GO:0006139//nucleobase-containing compound metabolic process	--
Unigene0001531	19	8	6	5	12	104	75	65	61	53	3.52	1.3	1	0.66	1.74	12.54	6.93	10.19	8.49	6.81	1.644	8.992	2.451431737	3.57E-06	7.25E-05	--	-	-	-	-	-	-	-	-	--
Unigene0016202	3	3	3	5	1	24	17	15	20	25	0.8	0.7	0.72	0.94	0.21	4.16	2.26	3.38	4	4.62	0.674	3.684	2.450452565	0.000302509	0.003625065	--	-	-	-	-	-	-	-	-	--
Unigene0042754	137	131	129	231	145	1219	1535	869	709	1001	3.65	3.05	3.08	4.35	3.01	21.11	20.36	19.55	14.17	18.46	3.428	18.73	2.449911885	4.46E-33	1.84E-30	BTBD9	XP_045114496.1 BTB/POZ domain-containing protein 9-like isoform X8 [Portunus trituberculatus]	-	-	-	-	GO:0000151//ubiquitin ligase complex;GO:0005575//cellular_component;GO:0005622//intracellular anatomical structure;GO:0005737//cytoplasm;GO:0019005//SCF ubiquitin ligase complex;GO:0031461//cullin-RING ubiquitin ligase complex;GO:0031463//Cul3-RING ubiquitin ligase complex;GO:0032991//protein-containing complex;GO:1902494//catalytic complex;GO:1990234//transferase complex	GO:0003674//molecular_function;GO:0005488//binding;GO:0005515//protein binding;GO:0019899//enzyme binding;GO:0030674//protein-macromolecule adaptor activity;GO:0031625//ubiquitin protein ligase binding;GO:0044389//ubiquitin-like protein ligase binding;GO:0060090//molecular adaptor activity	GO:0001505//regulation of neurotransmitter levels;GO:0003008//system process;GO:0006508//proteolysis;GO:0006511//ubiquitin-dependent protein catabolic process;GO:0006725//cellular aromatic compound metabolic process;GO:0006807//nitrogen compound metabolic process;GO:0007600//sensory perception;GO:0007610//behavior;GO:0007611//learning or memory;GO:0007613//memory;GO:0007616//long-term memory;GO:0…	--
Unigene0007892	7	10	6	12	2	131	44	35	16	31	1.35	1.68	1.04	1.63	0.3	16.39	4.22	5.69	2.31	4.13	1.2	6.548	2.448019916	0.000448332	0.00510879	--	-	-	-	-	-	-	-	GO:0007218//neuropeptide signaling pathway;GO:0007631//feeding behavior	--
Unigene0034832	734	797	747	1069	1136	6799	9699	4768	3229	6796	37.19	35.39	33.99	38.3	44.91	224.18	244.94	204.29	122.9	238.71	37.956	207.004	2.447258779	1.13E-20	1.92E-18	Smyd2	XP_045121593.1 SET and MYND domain-containing protein 4-like isoform X2 [Portunus trituberculatus]	-	-	-	-	GO:0005575//cellular_component;GO:0005622//intracellular anatomical structure;GO:0005737//cytoplasm	GO:0003674//molecular_function;GO:0005488//binding;GO:0005515//protein binding;GO:0019899//enzyme binding;GO:0042826//histone deacetylase binding	GO:0001654//eye development;GO:0001745//compound eye morphogenesis;GO:0001751//compound eye photoreceptor cell differentiation;GO:0001754//eye photoreceptor cell differentiation;GO:0007275//multicellular organism development;GO:0007399//nervous system development;GO:0007423//sensory organ development;GO:0008150//biological_process;GO:0009653//anatomical structure morphogenesis;GO:0009887//animal …	--
Unigene0035261	154	181	201	378	199	1805	2397	938	1015	1539	8.58	8.84	10.06	14.89	8.65	65.44	66.56	44.19	42.48	59.44	10.204	55.622	2.446520817	5.13E-24	1.14E-21	phy-2	XP_045113672.1 prolyl 4-hydroxylase subunit alpha-1-like isoform X3 [Portunus trituberculatus]	Metabolism;Metabolism	Global and overview maps;Amino acid metabolism	ko01100//Metabolic pathways;ko00330//Arginine and proline metabolism	K00472;K00472	GO:0005783//endoplasmic reticulum	GO:0004656//procollagen-proline 4-dioxygenase activity;GO:0016491//oxidoreductase activity;GO:0016702//oxidoreductase activity, acting on single donors with incorporation of molecular oxygen, incorporation of two atoms of oxygen	-	--
Unigene0035669	3	11	7	13	8	115	82	18	31	48	0.48	1.54	1	1.47	1	11.94	6.52	2.43	3.71	5.31	1.098	5.982	2.445749856	5.08E-05	0.000761584	--	-	-	-	-	-	-	-	-	--
Unigene0010354	95	86	114	153	115	640	844	493	880	936	11.88	9.43	12.81	13.53	11.23	52.1	52.62	52.15	82.69	81.17	11.776	64.146	2.445509728	2.58E-21	4.49E-19	Manf	XP_045127099.1 mesencephalic astrocyte-derived neurotrophic factor homolog [Portunus trituberculatus]	-	-	-	-	GO:0005575//cellular_component;GO:0005576//extracellular region;GO:0005615//extracellular space;GO:0005622//intracellular anatomical structure;GO:0005737//cytoplasm;GO:0005783//endoplasmic reticulum;GO:0005788//endoplasmic reticulum lumen;GO:0005829//cytosol;GO:0012505//endomembrane system;GO:0016528//sarcoplasm;GO:0016529//sarcoplasmic reticulum;GO:0031974//membrane-enclosed lumen;GO:0033018//sa…	GO:0003674//molecular_function;GO:0005102//signaling receptor binding;GO:0005488//binding;GO:0005509//calcium ion binding;GO:0005515//protein binding;GO:0008083//growth factor activity;GO:0008289//lipid binding;GO:0030545//signaling receptor regulator activity;GO:0043167//ion binding;GO:0043169//cation binding;GO:0046872//metal ion binding;GO:0048018//receptor ligand activity;GO:0098772//molecula…	GO:0001963//synaptic transmission, dopaminergic;GO:0001976//nervous system process involved in regulation of systemic arterial blood pressure;GO:0001980//regulation of systemic arterial blood pressure by ischemic conditions;GO:0002014//vasoconstriction of artery involved in ischemic response to lowering of systemic arterial blood pressure;GO:0002576//platelet degranulation;GO:0003008//system proc…	--
Unigene0014965	9	5	10	15	15	91	74	57	90	44	1.16	0.56	1.15	1.36	1.5	7.61	4.74	6.2	8.69	3.92	1.146	6.232	2.443088189	3.66E-07	9.00E-06	--	-	-	-	-	-	-	-	-	--
Unigene0017552	2	6	0	3	1	17	18	16	12	18	0.34	0.89	0	0.36	0.13	1.88	1.52	2.3	1.53	2.12	0.344	1.87	2.4425578	0.002027985	0.018375829	--	-	-	-	-	-	-	-	-	--
Unigene0036117	225	230	265	444	235	2038	2689	1535	1412	1857	7.18	6.43	7.59	10.02	5.85	42.33	42.77	41.43	33.85	41.09	7.414	40.294	2.442241009	2.91E-42	2.58E-39	SND1	XP_045106054.1 staphylococcal nuclease domain-containing protein 1-like [Portunus trituberculatus]	-	-	-	-	GO:0005575//cellular_component;GO:0005622//intracellular anatomical structure;GO:0005634//nucleus;GO:0005737//cytoplasm;GO:0005829//cytosol;GO:0016442//RISC complex;GO:0031332//RNAi effector complex;GO:0031410//cytoplasmic vesicle;GO:0031982//vesicle;GO:0032991//protein-containing complex;GO:0042470//melanosome;GO:0043226//organelle;GO:0043227//membrane-bounded organelle;GO:0043229//intracellular…	GO:0003674//molecular_function;GO:0003676//nucleic acid binding;GO:0003712//transcription coregulator activity;GO:0003713//transcription coactivator activity;GO:0003723//RNA binding;GO:0003824//catalytic activity;GO:0004518//nuclease activity;GO:0005488//binding;GO:0005515//protein binding;GO:0016787//hydrolase activity;GO:0016788//hydrolase activity, acting on ester bonds;GO:0097159//organic cyc…	GO:0000003//reproduction;GO:0006139//nucleobase-containing compound metabolic process;GO:0006325//chromatin organization;GO:0006351//transcription, DNA-templated;GO:0006355//regulation of transcription, DNA-templated;GO:0006401//RNA catabolic process;GO:0006725//cellular aromatic compound metabolic process;GO:0006807//nitrogen compound metabolic process;GO:0006996//organelle organization;GO:00072…	--
Unigene0018437	1	1	5	6	2	35	31	20	12	3	0.13	0.12	0.6	0.57	0.21	3.04	2.07	2.26	1.2	0.28	0.326	1.77	2.440805491	0.006028676	0.045492473	--	XP_045103199.1 fibrous sheath CABYR-binding protein-like [Portunus trituberculatus]	-	-	-	-	-	-	-	--
Unigene0022952	13	12	6	18	20	61	57	105	41	178	0.89	0.72	0.37	0.87	1.06	2.71	1.94	6.05	2.1	8.41	0.782	4.242	2.439504108	3.68E-05	0.000573581	--	XP_045105891.1 uncharacterized protein LOC123501237 isoform X2 [Portunus trituberculatus]	-	-	-	-	-	-	-	--
Unigene0015551	17	31	33	8	19	78	103	159	228	149	3.5	5.59	6.09	1.16	3.05	10.44	10.56	27.65	35.22	21.24	3.878	21.022	2.438515223	1.85E-05	0.000314957	--	-	-	-	-	-	-	-	-	--
Unigene0004534	85	148	128	164	110	914	1199	527	832	882	6.99	10.67	9.45	9.54	7.06	48.92	49.15	36.66	51.4	50.29	8.742	47.284	2.435316803	4.56E-31	1.65E-28	Srprb	KAG0714624.1 Signal recognition particle receptor subunit beta [Chionoecetes opilio]	Genetic Information Processing	Folding, sorting and degradation	ko03060//Protein export	K12272	GO:0005575//cellular_component;GO:0005576//extracellular region;GO:0005604//basement membrane;GO:0005615//extracellular space;GO:0005622//intracellular anatomical structure;GO:0005737//cytoplasm;GO:0005783//endoplasmic reticulum;GO:0005785//signal recognition particle receptor complex;GO:0005789//endoplasmic reticulum membrane;GO:0005791//rough endoplasmic reticulum;GO:0005856//cytoskeleton;GO:00…	GO:0000166//nucleotide binding;GO:0001882//nucleoside binding;GO:0001883//purine nucleoside binding;GO:0003674//molecular_function;GO:0003824//catalytic activity;GO:0003924//GTPase activity;GO:0005047//signal recognition particle binding;GO:0005215//transporter activity;GO:0005381//iron ion transmembrane transporter activity;GO:0005488//binding;GO:0005506//iron ion binding;GO:0005515//protein bin…	GO:0000041//transition metal ion transport;GO:0001666//response to hypoxia;GO:0002164//larval development;GO:0002165//instar larval or pupal development;GO:0002168//instar larval development;GO:0002526//acute inflammatory response;GO:0003002//regionalization;GO:0006605//protein targeting;GO:0006612//protein targeting to membrane;GO:0006613//cotranslational protein targeting to membrane;GO:0006614…	--
Unigene0003778	6	1	1	3	3	20	29	16	12	23	0.96	0.14	0.14	0.34	0.38	2.09	2.32	2.17	1.45	2.56	0.392	2.118	2.43377703	0.000609095	0.006631271	--	-	-	-	-	-	-	-	-	--
Unigene0025821	13	32	36	25	34	205	153	188	211	155	1.45	3.14	3.62	1.98	2.97	14.93	8.53	17.79	17.74	12.02	2.632	14.202	2.431862718	2.13E-09	7.83E-08	zgc:112185	XP_045129909.1 UPF0488 protein CG14286-like isoform X1 [Portunus trituberculatus]	-	-	-	-	GO:0005575//cellular_component	GO:0003674//molecular_function	GO:0008150//biological_process	--
Unigene0007937	225	345	181	452	391	2444	2194	1991	1856	1919	11.68	15.7	8.44	16.6	15.84	82.58	56.78	87.42	72.39	69.08	13.652	73.65	2.431573206	8.42E-18	1.04E-15	Smyd3	XP_045113982.1 uncharacterized protein LOC123506141 isoform X1 [Portunus trituberculatus]	Metabolism;Metabolism	Global and overview maps;Amino acid metabolism	ko01100//Metabolic pathways;ko00310//Lysine degradation	K11426;K11426	GO:0005575//cellular_component	GO:0003674//molecular_function;GO:0005488//binding;GO:0005515//protein binding;GO:0008270//zinc ion binding;GO:0043167//ion binding;GO:0043169//cation binding;GO:0046872//metal ion binding;GO:0046914//transition metal ion binding	-	--
Unigene0015852	88	100	106	227	121	1158	1278	642	397	871	5.76	5.73	6.23	10.5	6.18	49.31	41.68	35.52	19.51	39.51	6.88	37.106	2.431172018	1.20E-14	9.93E-13	RABAC1	KAG0723936.1 Prenylated Rab acceptor protein 1 [Chionoecetes opilio]	-	-	-	-	GO:0005575//cellular_component;GO:0005622//intracellular anatomical structure;GO:0005737//cytoplasm;GO:0005794//Golgi apparatus;GO:0005886//plasma membrane;GO:0008021//synaptic vesicle;GO:0012505//endomembrane system;GO:0016020//membrane;GO:0016021//integral component of membrane;GO:0030054//cell junction;GO:0030133//transport vesicle;GO:0031224//intrinsic component of membrane;GO:0031410//cytopl…	GO:0003674//molecular_function;GO:0005488//binding;GO:0005515//protein binding;GO:0008022//protein C-terminus binding;GO:0030674//protein-macromolecule adaptor activity;GO:0042802//identical protein binding;GO:0060090//molecular adaptor activity;GO:0070064//proline-rich region binding	GO:0006810//transport;GO:0008150//biological_process;GO:0016192//vesicle-mediated transport;GO:0051179//localization;GO:0051234//establishment of localization	--
Unigene0006754	28	57	19	62	42	377	306	261	164	261	0.92	1.65	0.56	1.45	1.08	8.1	5.04	7.29	4.07	5.98	1.132	6.096	2.428988945	3.36E-11	1.67E-09	--	XP_045132220.1 LOW QUALITY PROTEIN: fas-binding factor 1-like [Portunus trituberculatus]	-	-	-	-	-	-	-	--
Unigene0015101	39	40	65	82	83	897	213	482	157	221	1.5	1.35	2.24	2.23	2.49	22.43	4.08	15.66	4.53	5.89	1.962	10.518	2.422463455	2.08E-05	0.000349927	NPC1	KAG0719980.1 NPC intracellular cholesterol transporter 1 1b [Chionoecetes opilio]	Cellular Processes	Transport and catabolism	ko04142//Lysosome	K12385	GO:0016020//membrane;GO:0016021//integral component of membrane	GO:0015562//efflux transmembrane transporter activity;GO:0022857//transmembrane transporter activity	GO:0006810//transport;GO:0055085//transmembrane transport	--
Unigene0042817	7	14	13	23	13	85	99	65	79	127	0.8	1.4	1.33	1.85	1.16	6.31	5.63	6.27	6.77	10.04	1.308	7.004	2.420816543	1.10E-10	5.01E-09	--	-	-	-	-	-	-	-	-	--
Unigene0003689	26	30	39	90	31	364	449	127	146	372	1.08	1.09	1.46	2.65	1.01	9.86	9.32	4.47	4.57	10.74	1.458	7.792	2.418002958	2.18E-09	8.01E-08	RIOK1	XP_045105150.1 serine/threonine-protein kinase RIO1-like [Portunus trituberculatus]	Genetic Information Processing	Translation	ko03008//Ribosome biogenesis in eukaryotes	K07178	GO:0005575//cellular_component;GO:0005622//intracellular anatomical structure;GO:0005634//nucleus;GO:0005654//nucleoplasm;GO:0005737//cytoplasm;GO:0005829//cytosol;GO:0030684//preribosome;GO:0030688//preribosome, small subunit precursor;GO:0031974//membrane-enclosed lumen;GO:0031981//nuclear lumen;GO:0032991//protein-containing complex;GO:0034708//methyltransferase complex;GO:0043226//organelle;G…	GO:0000166//nucleotide binding;GO:0003674//molecular_function;GO:0003824//catalytic activity;GO:0004672//protein kinase activity;GO:0004674//protein serine/threonine kinase activity;GO:0004774//succinate-CoA ligase activity;GO:0004775//succinate-CoA ligase (ADP-forming) activity;GO:0004776//succinate-CoA ligase (GDP-forming) activity;GO:0005488//binding;GO:0005524//ATP binding;GO:0016301//kinase …	GO:0000003//reproduction;GO:0001932//regulation of protein phosphorylation;GO:0001933//negative regulation of protein phosphorylation;GO:0002119//nematode larval development;GO:0002164//larval development;GO:0003006//developmental process involved in reproduction;GO:0006099//tricarboxylic acid cycle;GO:0006139//nucleobase-containing compound metabolic process;GO:0006364//rRNA processing;GO:000639…	--
Unigene0029735	22	24	19	23	13	155	191	115	140	92	3.71	3.54	2.87	2.74	1.71	16.99	16.04	16.38	17.71	10.74	2.914	15.572	2.417881467	1.92E-12	1.18E-10	--	-	-	-	-	-	-	-	-	--
Unigene0035288	14	23	16	23	12	155	97	98	126	100	0.66	0.95	0.68	0.77	0.44	4.76	2.28	3.91	4.47	3.27	0.7	3.738	2.416839742	3.48E-10	1.46E-08	--	XP_045115262.1 piggyBac transposable element-derived protein 2-like [Portunus trituberculatus]	-	-	-	-	-	-	-	--
Unigene0013596	4	3	4	4	2	29	34	8	27	22	0.53	0.35	0.47	0.37	0.21	2.48	2.23	0.89	2.67	2.01	0.386	2.056	2.413167512	0.000248467	0.003062928	--	-	-	-	-	-	-	-	-	--
Unigene0014716	66	68	62	105	69	511	735	296	312	669	3.44	3.11	2.91	3.88	2.81	17.35	19.12	13.06	12.23	24.2	3.23	17.192	2.412131318	1.18E-20	1.97E-18	--	XP_045593923.1 mucin-19-like isoform X1 [Procambarus clarkii]	-	-	-	-	-	-	-	--
Unigene0000305	82	117	72	88	49	422	2185	225	215	208	3.84	4.81	3.03	2.92	1.79	12.87	51.06	8.92	7.57	6.76	3.278	17.436	2.411181349	8.34E-05	0.001181211	--	XP_045120015.1 uncharacterized protein LOC123509643 isoform X2 [Portunus trituberculatus]	-	-	-	-	-	GO:0004803//transposase activity	GO:0006313//transposition, DNA-mediated	--
Unigene0038576	10	10	7	11	13	49	103	57	61	74	1.53	1.34	0.96	1.19	1.55	4.87	7.84	7.36	7	7.84	1.314	6.982	2.409675081	2.30E-09	8.40E-08	Cnpy2	XP_045125992.1 protein canopy homolog 2-like [Portunus trituberculatus]	-	-	-	-	GO:0005575//cellular_component;GO:0005622//intracellular anatomical structure;GO:0005737//cytoplasm;GO:0005783//endoplasmic reticulum;GO:0012505//endomembrane system;GO:0043226//organelle;GO:0043227//membrane-bounded organelle;GO:0043229//intracellular organelle;GO:0043231//intracellular membrane-bounded organelle	GO:0003674//molecular_function;GO:0005488//binding;GO:0005515//protein binding;GO:0051087//chaperone binding	GO:0002791//regulation of peptide secretion;GO:0003002//regionalization;GO:0006457//protein folding;GO:0007154//cell communication;GO:0007165//signal transduction;GO:0007166//cell surface receptor signaling pathway;GO:0007167//enzyme linked receptor protein signaling pathway;GO:0007275//multicellular organism development;GO:0007389//pattern specification process;GO:0008150//biological_process;GO:…	--
Unigene0012373	3	15	3	13	14	85	23	48	104	32	0.22	0.96	0.2	0.67	0.79	4.02	0.83	2.95	5.68	1.61	0.568	3.018	2.409629971	0.000723917	0.007655249	--	-	-	-	-	-	-	-	-	--
Unigene0012124	4	0	2	5	1	21	24	11	16	10	0.39	0	0.18	0.35	0.08	1.35	1.18	0.92	1.18	0.68	0.2	1.062	2.408711861	0.002386333	0.02108619	--	-	-	-	-	-	-	-	-	--
Unigene0044048	201	219	279	257	265	1618	2073	1429	1633	1370	11.16	10.66	13.91	10.09	11.48	58.46	57.36	67.09	68.1	52.73	11.46	60.748	2.406229868	9.46E-27	2.68E-24	--	-	-	-	-	-	-	-	-	--
Unigene0003060	376	286	58	352	168	2680	2397	1515	1222	671	38.61	25.73	5.35	25.56	13.46	179.06	122.66	131.53	94.24	47.76	21.742	115.05	2.403704422	4.91E-06	9.64E-05	--	-	-	-	-	-	-	-	-	--
Unigene0045970	14	28	14	53	12	190	168	131	131	147	0.74	1.3	0.67	1.99	0.5	6.56	4.44	5.87	5.22	5.4	1.04	5.498	2.402323378	6.28E-10	2.52E-08	sil1	XP_045110620.1 nucleotide exchange factor SIL1-like [Portunus trituberculatus]	Genetic Information Processing	Folding, sorting and degradation	ko04141//Protein processing in endoplasmic reticulum	K14001	GO:0005575//cellular_component;GO:0005622//intracellular anatomical structure;GO:0005737//cytoplasm;GO:0005783//endoplasmic reticulum;GO:0005788//endoplasmic reticulum lumen;GO:0012505//endomembrane system;GO:0031974//membrane-enclosed lumen;GO:0043226//organelle;GO:0043227//membrane-bounded organelle;GO:0043229//intracellular organelle;GO:0043231//intracellular membrane-bounded organelle;GO:0043…	GO:0003674//molecular_function;GO:0005488//binding;GO:0005515//protein binding;GO:0051082//unfolded protein binding	GO:0006457//protein folding;GO:0006605//protein targeting;GO:0006612//protein targeting to membrane;GO:0006613//cotranslational protein targeting to membrane;GO:0006614//SRP-dependent cotranslational protein targeting to membrane;GO:0006616//SRP-dependent cotranslational protein targeting to membrane, translocation;GO:0006810//transport;GO:0006886//intracellular protein transport;GO:0008104//prot…	--
Unigene0041662	1	7	9	5	2	24	46	14	20	61	0.09	0.55	0.73	0.32	0.14	1.4	2.06	1.06	1.35	3.8	0.366	1.934	2.401672241	0.000574621	0.006314778	--	-	-	-	-	-	-	-	-	--
Unigene0001963	104	89	102	104	128	794	967	601	538	646	4.36	3.27	3.84	3.08	4.19	21.66	20.21	21.31	16.94	18.78	3.748	19.78	2.399849568	1.99E-23	4.15E-21	Gars1	XP_045120077.1 glycine--tRNA ligase-like isoform X1 [Portunus trituberculatus]	Genetic Information Processing	Translation	ko00970//Aminoacyl-tRNA biosynthesis	K01880	GO:0005575//cellular_component;GO:0005576//extracellular region;GO:0005615//extracellular space;GO:0005622//intracellular anatomical structure;GO:0005737//cytoplasm;GO:0005739//mitochondrion;GO:0005759//mitochondrial matrix;GO:0005768//endosome;GO:0005794//Golgi apparatus;GO:0005802//trans-Golgi network;GO:0005829//cytosol;GO:0009345//glycine-tRNA ligase complex;GO:0012505//endomembrane system;GO…	GO:0000166//nucleotide binding;GO:0003674//molecular_function;GO:0003824//catalytic activity;GO:0004081//bis(5'-nucleosyl)-tetraphosphatase (asymmetrical) activity;GO:0004551//nucleotide diphosphatase activity;GO:0004812//aminoacyl-tRNA ligase activity;GO:0004820//glycine-tRNA ligase activity;GO:0004821//histidine-tRNA ligase activity;GO:0004827//proline-tRNA ligase activity;GO:0005488//binding;G…	GO:0000902//cell morphogenesis;GO:0000904//cell morphogenesis involved in differentiation;GO:0000959//mitochondrial RNA metabolic process;GO:0002164//larval development;GO:0002181//cytoplasmic translation;GO:0002376//immune system process;GO:0002520//immune system development;GO:0006082//organic acid metabolic process;GO:0006139//nucleobase-containing compound metabolic process;GO:0006399//tRNA m…	--
Unigene0008255	13	18	7	35	4	64	142	83	76	134	0.92	1.12	0.45	1.76	0.22	2.95	5.02	4.98	4.05	6.59	0.894	4.718	2.399828682	8.94E-07	2.04E-05	Stam	XP_045109937.1 signal transducing adapter molecule 1-like [Portunus trituberculatus]	Cellular Processes	Transport and catabolism	ko04144//Endocytosis	K04705	GO:0005575//cellular_component;GO:0005622//intracellular anatomical structure;GO:0005737//cytoplasm;GO:0005768//endosome;GO:0005769//early endosome;GO:0005929//cilium;GO:0012505//endomembrane system;GO:0031410//cytoplasmic vesicle;GO:0031982//vesicle;GO:0032991//protein-containing complex;GO:0033565//ESCRT-0 complex;GO:0036452//ESCRT complex;GO:0042995//cell projection;GO:0043226//organelle;GO:00…	GO:0003674//molecular_function;GO:0005488//binding;GO:0005515//protein binding;GO:0008022//protein C-terminus binding;GO:0032182//ubiquitin-like protein binding;GO:0043130//ubiquitin binding	GO:0000003//reproduction;GO:0001505//regulation of neurotransmitter levels;GO:0001932//regulation of protein phosphorylation;GO:0001933//negative regulation of protein phosphorylation;GO:0006810//transport;GO:0006836//neurotransmitter transport;GO:0006886//intracellular protein transport;GO:0006897//endocytosis;GO:0006950//response to stress;GO:0007034//vacuolar transport;GO:0007041//lysosomal tr…	--
Unigene0045267	5	25	14	13	29	54	43	155	89	175	0.33	1.45	0.83	0.61	1.49	2.32	1.41	8.65	4.41	8.01	0.942	4.96	2.396541156	0.000393316	0.004559753	--	ADZ95942.1 reverse transcriptase, partial [Oeneis sculda]	-	-	-	-	-	GO:0003964//RNA-directed DNA polymerase activity	GO:0000373//Group II intron splicing	--
Unigene0006936	96	121	128	110	107	1081	847	569	632	617	4.41	4.87	5.28	3.57	3.83	32.31	19.39	22.1	21.8	19.65	4.392	23.05	2.391816791	2.28E-18	3.08E-16	RpII15	XP_045133919.1 DNA-directed RNA polymerase II subunit RPB9-like [Portunus trituberculatus]	Genetic Information Processing	Transcription	ko03020//RNA polymerase	K03017	-	GO:0003676//nucleic acid binding;GO:0003700//DNA-binding transcription factor activity;GO:0003711//transcription elongation regulator activity;GO:0008270//zinc ion binding	GO:0006351//transcription, DNA-templated	--
Unigene0029812	2	7	7	11	8	55	71	27	28	49	0.2	0.61	0.62	0.77	0.62	3.55	3.51	2.27	2.09	3.37	0.564	2.958	2.390854985	1.86E-06	3.98E-05	--	XP_045118283.1 FYVE, RhoGEF and PH domain-containing protein 4-like isoform X3 [Portunus trituberculatus]	-	-	-	-	-	-	-	--
Unigene0008732	29	31	44	75	43	401	263	219	234	289	1.48	1.39	2.02	2.71	1.72	13.35	6.71	9.48	8.99	10.25	1.864	9.756	2.387887898	6.21E-14	4.66E-12	PDE12	XP_045122261.1 2',5'-phosphodiesterase 12-like isoform X1 [Portunus trituberculatus]	-	-	-	-	GO:0005575//cellular_component;GO:0005622//intracellular anatomical structure;GO:0005737//cytoplasm;GO:0005739//mitochondrion;GO:0005759//mitochondrial matrix;GO:0031974//membrane-enclosed lumen;GO:0043226//organelle;GO:0043227//membrane-bounded organelle;GO:0043229//intracellular organelle;GO:0043231//intracellular membrane-bounded organelle;GO:0043233//organelle lumen;GO:0070013//intracellular …	GO:0000175//3'-5'-exoribonuclease activity;GO:0003674//molecular_function;GO:0003824//catalytic activity;GO:0004518//nuclease activity;GO:0004527//exonuclease activity;GO:0004532//exoribonuclease activity;GO:0004535//poly(A)-specific ribonuclease activity;GO:0004540//ribonuclease activity;GO:0005488//binding;GO:0008408//3'-5' exonuclease activity;GO:0016787//hydrolase activity;GO:0016788//hydrola…	GO:0000288//nuclear-transcribed mRNA catabolic process, deadenylation-dependent decay;GO:0000956//nuclear-transcribed mRNA catabolic process;GO:0000957//mitochondrial RNA catabolic process;GO:0000958//mitochondrial mRNA catabolic process;GO:0000959//mitochondrial RNA metabolic process;GO:0002082//regulation of oxidative phosphorylation;GO:0002376//immune system process;GO:0006139//nucleobase-cont…	--
Unigene0043812	8	13	14	20	17	102	179	51	56	101	0.45	0.64	0.7	0.79	0.74	3.7	4.98	2.41	2.35	3.91	0.664	3.47	2.385680516	4.58E-09	1.60E-07	DHX33	XP_045136889.1 ATP-dependent RNA helicase DHX33-like isoform X1 [Portunus trituberculatus]	-	-	-	-	GO:0005575//cellular_component;GO:0005622//intracellular anatomical structure;GO:0005634//nucleus;GO:0005654//nucleoplasm;GO:0005681//spliceosomal complex;GO:0005730//nucleolus;GO:0005737//cytoplasm;GO:0005829//cytosol;GO:0009898//cytoplasmic side of plasma membrane;GO:0031974//membrane-enclosed lumen;GO:0031981//nuclear lumen;GO:0032991//protein-containing complex;GO:0043226//organelle;GO:004322…	GO:0000166//nucleotide binding;GO:0000182//rDNA binding;GO:0003674//molecular_function;GO:0003676//nucleic acid binding;GO:0003677//DNA binding;GO:0003690//double-stranded DNA binding;GO:0003723//RNA binding;GO:0003724//RNA helicase activity;GO:0003725//double-stranded RNA binding;GO:0003729//mRNA binding;GO:0003824//catalytic activity;GO:0004386//helicase activity;GO:0005488//binding;GO:0005515/…	GO:0000462//maturation of SSU-rRNA from tricistronic rRNA transcript (SSU-rRNA, 5.8S rRNA, LSU-rRNA);GO:0001817//regulation of cytokine production;GO:0001819//positive regulation of cytokine production;GO:0001932//regulation of protein phosphorylation;GO:0001934//positive regulation of protein phosphorylation;GO:0006139//nucleobase-containing compound metabolic process;GO:0006355//regulation of t…	--
Unigene0044095	67	94	66	77	64	1123	530	344	227	256	2.5	3.08	2.21	2.03	1.87	27.29	9.87	10.86	6.37	6.63	2.338	12.204	2.38400725	4.62E-07	1.11E-05	--	XP_045118620.1 uncharacterized protein LOC123508778 isoform X5 [Portunus trituberculatus]	-	-	-	-	-	-	-	--
Unigene0020224	6	2	4	15	5	46	32	40	7	72	2.2	0.64	1.32	3.89	1.43	10.97	5.84	12.39	1.93	18.29	1.896	9.884	2.382136046	0.001384606	0.013243253	--	-	-	-	-	-	GO:0016021//integral component of membrane;GO:0019013//viral nucleocapsid	-	-	--
Unigene0038411	34	81	29	40	35	210	102	451	132	440	3.06	6.39	2.35	2.55	2.46	12.31	4.58	34.34	8.93	27.47	3.362	17.526	2.382105134	6.43E-05	0.000939727	--	-	-	-	-	-	-	GO:0016410//N-acyltransferase activity	GO:0009245//lipid A biosynthetic process	--
Unigene0039656	11	17	15	11	21	93	54	137	99	75	0.68	0.92	0.83	0.48	1.01	3.75	1.67	7.17	4.61	3.22	0.784	4.084	2.381057307	7.22E-06	0.00013575	NKRF	XP_045136663.1 protein SPT2 homolog [Portunus trituberculatus]	-	-	-	-	GO:0005575//cellular_component;GO:0005622//intracellular anatomical structure;GO:0005634//nucleus;GO:0005654//nucleoplasm;GO:0005730//nucleolus;GO:0031974//membrane-enclosed lumen;GO:0031981//nuclear lumen;GO:0043226//organelle;GO:0043227//membrane-bounded organelle;GO:0043228//non-membrane-bounded organelle;GO:0043229//intracellular organelle;GO:0043231//intracellular membrane-bounded organelle;…	GO:0000976//transcription cis-regulatory region binding;GO:0000977//RNA polymerase II transcription regulatory region sequence-specific DNA binding;GO:0000978//RNA polymerase II cis-regulatory region sequence-specific DNA binding;GO:0000981//DNA-binding transcription factor activity, RNA polymerase II-specific;GO:0000987//cis-regulatory region sequence-specific DNA binding;GO:0001067//transcripti…	GO:0006139//nucleobase-containing compound metabolic process;GO:0006351//transcription, DNA-templated;GO:0006355//regulation of transcription, DNA-templated;GO:0006357//regulation of transcription by RNA polymerase II;GO:0006366//transcription by RNA polymerase II;GO:0006725//cellular aromatic compound metabolic process;GO:0006807//nitrogen compound metabolic process;GO:0007154//cell communicatio…	--
Unigene0015839	52	60	51	79	77	422	564	336	280	485	1.43	1.45	1.26	1.54	1.65	7.55	7.73	7.81	5.78	9.24	1.466	7.622	2.378284505	2.38E-24	5.41E-22	--	XP_045103567.1 capping protein inhibiting regulator of actin dynamics-like isoform X1 [Portunus trituberculatus]	-	-	-	-	-	-	-	--
Unigene0040465	23	24	17	35	17	159	197	137	106	156	1.04	0.95	0.69	1.12	0.6	4.68	4.44	5.24	3.6	4.89	0.88	4.57	2.376618736	4.91E-16	4.93E-14	RRP12	XP_045109137.1 LOW QUALITY PROTEIN: RRP12-like protein [Portunus trituberculatus]	-	-	-	-	GO:0005575//cellular_component;GO:0005622//intracellular anatomical structure;GO:0005634//nucleus;GO:0005635//nuclear envelope;GO:0005730//nucleolus;GO:0005737//cytoplasm;GO:0005840//ribosome;GO:0012505//endomembrane system;GO:0016020//membrane;GO:0016021//integral component of membrane;GO:0030684//preribosome;GO:0030686//90S preribosome;GO:0031090//organelle membrane;GO:0031224//intrinsic compon…	GO:0003674//molecular_function;GO:0003676//nucleic acid binding;GO:0003723//RNA binding;GO:0003729//mRNA binding;GO:0005488//binding;GO:0097159//organic cyclic compound binding;GO:1901363//heterocyclic compound binding	GO:0000462//maturation of SSU-rRNA from tricistronic rRNA transcript (SSU-rRNA, 5.8S rRNA, LSU-rRNA);GO:0006139//nucleobase-containing compound metabolic process;GO:0006364//rRNA processing;GO:0006396//RNA processing;GO:0006725//cellular aromatic compound metabolic process;GO:0006807//nitrogen compound metabolic process;GO:0008150//biological_process;GO:0008152//metabolic process;GO:0009987//cell…	--
Unigene0025191	48	79	56	173	126	734	834	273	829	385	5.94	8.56	6.22	15.13	12.16	59.08	51.42	28.56	77.03	33.01	9.602	49.82	2.37531818	2.51E-08	7.71E-07	--	-	-	-	-	-	GO:0016021//integral component of membrane;GO:0042765//GPI-anchor transamidase complex	-	-	--
Unigene0016257	549	515	471	683	584	3892	4360	3008	3147	3769	45.5	37.4	35.05	40.03	37.76	209.88	180.08	210.78	195.89	216.52	39.148	202.63	2.371837276	1.40E-45	1.62E-42	CCT7	XP_045121280.1 T-complex protein 1 subunit eta-like [Portunus trituberculatus]	-	-	-	-	GO:0002199//zona pellucida receptor complex;GO:0005575//cellular_component;GO:0005622//intracellular anatomical structure;GO:0005737//cytoplasm;GO:0005829//cytosol;GO:0005832//chaperonin-containing T-complex;GO:0005856//cytoskeleton;GO:0005874//microtubule;GO:0005886//plasma membrane;GO:0015630//microtubule cytoskeleton;GO:0016020//membrane;GO:0032991//protein-containing complex;GO:0043209//myeli…	GO:0000166//nucleotide binding;GO:0003674//molecular_function;GO:0005488//binding;GO:0005515//protein binding;GO:0005524//ATP binding;GO:0016887//ATP hydrolysis activity;GO:0017076//purine nucleotide binding;GO:0030554//adenyl nucleotide binding;GO:0032553//ribonucleotide binding;GO:0032555//purine ribonucleotide binding;GO:0032559//adenyl ribonucleotide binding;GO:0035639//purine ribonucleoside …	GO:0000003//reproduction;GO:0006457//protein folding;GO:0006458//'de novo' protein folding;GO:0006810//transport;GO:0007338//single fertilization;GO:0007339//binding of sperm to zona pellucida;GO:0008037//cell recognition;GO:0008150//biological_process;GO:0009566//fertilization;GO:0009889//regulation of biosynthetic process;GO:0009891//positive regulation of biosynthetic process;GO:0009893//posit…	--
Unigene0018459	22	14	11	40	7	46	106	77	42	323	2.11	1.17	0.95	2.71	0.52	2.87	5.06	6.23	3.02	21.43	1.492	7.722	2.371727019	0.000502075	0.005629451	--	-	-	-	-	-	-	-	-	--
Unigene0037824	51	45	72	107	83	517	675	301	406	427	3.43	2.65	4.35	5.09	4.35	22.61	22.61	17.11	20.5	19.89	3.974	20.544	2.37005333	6.55E-20	1.03E-17	GTPBP4	XP_045138551.1 GTP-binding protein 4-like [Portunus trituberculatus]	Genetic Information Processing	Translation	ko03008//Ribosome biogenesis in eukaryotes	K06943	GO:0005575//cellular_component;GO:0005622//intracellular anatomical structure;GO:0005634//nucleus;GO:0005635//nuclear envelope;GO:0005730//nucleolus;GO:0005737//cytoplasm;GO:0005794//Golgi apparatus;GO:0005829//cytosol;GO:0012505//endomembrane system;GO:0016020//membrane;GO:0030684//preribosome;GO:0030687//preribosome, large subunit precursor;GO:0031090//organelle membrane;GO:0031965//nuclear mem…	GO:0000166//nucleotide binding;GO:0001882//nucleoside binding;GO:0001883//purine nucleoside binding;GO:0003674//molecular_function;GO:0003824//catalytic activity;GO:0003924//GTPase activity;GO:0005488//binding;GO:0005525//GTP binding;GO:0016462//pyrophosphatase activity;GO:0016787//hydrolase activity;GO:0016817//hydrolase activity, acting on acid anhydrides;GO:0016818//hydrolase activity, acting …	GO:0000054//ribosomal subunit export from nucleus;GO:0000079//regulation of cyclin-dependent protein serine/threonine kinase activity;GO:0000226//microtubule cytoskeleton organization;GO:0000278//mitotic cell cycle;GO:0000280//nuclear division;GO:0000463//maturation of LSU-rRNA from tricistronic rRNA transcript (SSU-rRNA, 5.8S rRNA, LSU-rRNA);GO:0000470//maturation of LSU-rRNA;GO:0001932//regulat…	--
Unigene0019363	5	6	5	11	8	42	60	26	33	64	0.29	0.31	0.26	0.46	0.37	1.61	1.76	1.29	1.46	2.61	0.338	1.746	2.368958407	1.14E-06	2.54E-05	--	XP_045121774.1 zinc finger protein 184-like isoform X7 [Portunus trituberculatus]	-	-	-	-	GO:0005634//nucleus	GO:0008270//zinc ion binding	-	zf-C2H2
Unigene0006397	2	7	13	14	4	53	56	45	48	48	0.23	0.7	1.34	1.13	0.36	3.95	3.19	4.35	4.12	3.81	0.752	3.884	2.368738634	1.85E-06	3.97E-05	Dph7	XP_045137870.1 diphthine methyltransferase-like isoform X1 [Portunus trituberculatus]	-	-	-	-	GO:0005575//cellular_component;GO:0005622//intracellular anatomical structure;GO:0005737//cytoplasm;GO:0005768//endosome;GO:0012505//endomembrane system;GO:0031410//cytoplasmic vesicle;GO:0031982//vesicle;GO:0032991//protein-containing complex;GO:0043226//organelle;GO:0043227//membrane-bounded organelle;GO:0043229//intracellular organelle;GO:0097708//intracellular vesicle	GO:0003674//molecular_function;GO:0003824//catalytic activity;GO:0005515//protein binding;GO:0016787//hydrolase activity;GO:0016788//hydrolase activity, acting on ester bonds;GO:0032451//demethylase activity;GO:0052689//carboxylic ester hydrolase activity;GO:0061685//diphthine methylesterase activity	GO:0006417//regulation of translation;GO:0006448//regulation of translational elongation;GO:0006464//cellular protein modification process;GO:0006807//nitrogen compound metabolic process;GO:0006810//transport;GO:0008150//biological_process;GO:0008152//metabolic process;GO:0009058//biosynthetic process;GO:0009889//regulation of biosynthetic process;GO:0009987//cellular process;GO:0010468//regulati…	--
Unigene0017700	8	21	26	31	27	154	232	128	98	119	0.2	0.46	0.58	0.55	0.53	2.5	2.88	2.7	1.84	2.06	0.464	2.396	2.368431198	5.18E-11	2.49E-09	UBN2	XP_045138973.1 ubinuclein-1-like isoform X6 [Portunus trituberculatus]	-	-	-	-	GO:0000775//chromosome, centromeric region;GO:0000776//kinetochore;GO:0001674//female germ cell nucleus;GO:0001940//male pronucleus;GO:0005575//cellular_component;GO:0005622//intracellular anatomical structure;GO:0005634//nucleus;GO:0005694//chromosome;GO:0032991//protein-containing complex;GO:0042585//germinal vesicle;GO:0043073//germ cell nucleus;GO:0043226//organelle;GO:0043227//membrane-bound…	GO:0003674//molecular_function;GO:0003676//nucleic acid binding;GO:0003677//DNA binding;GO:0005488//binding;GO:0097159//organic cyclic compound binding;GO:1901363//heterocyclic compound binding	GO:0000003//reproduction;GO:0000280//nuclear division;GO:0006325//chromatin organization;GO:0006338//chromatin remodeling;GO:0006996//organelle organization;GO:0006997//nucleus organization;GO:0007049//cell cycle;GO:0007143//female meiotic nuclear division;GO:0007276//gamete generation;GO:0007292//female gamete generation;GO:0007338//single fertilization;GO:0008150//biological_process;GO:0009566/…	--
Unigene0032155	95	85	135	78	104	872	1033	510	269	698	8.92	7	11.39	5.18	7.62	53.3	48.36	40.5	18.98	45.45	8.022	41.318	2.364736551	3.85E-10	1.60E-08	NUDC	XP_042870189.1 nuclear migration protein nudC-like [Penaeus japonicus]	-	-	-	-	GO:0005575//cellular_component;GO:0005622//intracellular anatomical structure;GO:0005634//nucleus;GO:0005654//nucleoplasm;GO:0005737//cytoplasm;GO:0005794//Golgi apparatus;GO:0005829//cytosol;GO:0005856//cytoskeleton;GO:0005874//microtubule;GO:0012505//endomembrane system;GO:0015630//microtubule cytoskeleton;GO:0031974//membrane-enclosed lumen;GO:0031981//nuclear lumen;GO:0043226//organelle;GO:00…	GO:0003674//molecular_function;GO:0005488//binding;GO:0005515//protein binding;GO:0042802//identical protein binding;GO:0051082//unfolded protein binding	GO:0000003//reproduction;GO:0000070//mitotic sister chromatid segregation;GO:0000278//mitotic cell cycle;GO:0000280//nuclear division;GO:0000741//karyogamy;GO:0000819//sister chromatid segregation;GO:0002119//nematode larval development;GO:0002164//larval development;GO:0006457//protein folding;GO:0006810//transport;GO:0006928//movement of cell or subcellular component;GO:0006996//organelle organ…	--
Unigene0001520	69	166	131	83	72	726	640	639	526	831	2.24	4.73	3.82	1.91	1.83	15.35	10.36	17.56	12.84	18.72	2.906	14.966	2.364582072	5.80E-11	2.76E-09	--	-	-	-	-	-	-	-	-	--
Unigene0044718	57	140	50	172	138	405	263	1051	477	1000	11.41	24.56	8.99	24.35	21.56	52.77	26.24	177.94	71.74	138.8	18.174	93.498	2.363059521	2.48E-05	0.00040706	--	-	-	-	-	-	-	-	-	--
Unigene0002957	1329	1182	991	1370	1390	9376	11723	6531	6638	6989	30.43	23.71	20.37	22.18	24.83	139.69	133.77	126.44	114.16	110.93	24.304	124.998	2.362639332	2.08E-27	6.29E-25	CCT5	KAG0711919.1 T-complex protein 1 subunit epsilon [Chionoecetes opilio]	-	-	-	-	GO:0002199//zona pellucida receptor complex;GO:0005575//cellular_component;GO:0005622//intracellular anatomical structure;GO:0005634//nucleus;GO:0005730//nucleolus;GO:0005737//cytoplasm;GO:0005813//centrosome;GO:0005815//microtubule organizing center;GO:0005829//cytosol;GO:0005832//chaperonin-containing T-complex;GO:0005856//cytoskeleton;GO:0005874//microtubule;GO:0005887//integral component of p…	GO:0000166//nucleotide binding;GO:0003674//molecular_function;GO:0003676//nucleic acid binding;GO:0003723//RNA binding;GO:0003729//mRNA binding;GO:0003730//mRNA 3'-UTR binding;GO:0005298//proline:sodium symporter activity;GO:0005488//binding;GO:0005515//protein binding;GO:0005524//ATP binding;GO:0008092//cytoskeletal protein binding;GO:0015370//solute:sodium symporter activity;GO:0015498//pantoth…	GO:0000003//reproduction;GO:0006457//protein folding;GO:0006458//'de novo' protein folding;GO:0006810//transport;GO:0006814//sodium ion transport;GO:0007338//single fertilization;GO:0007339//binding of sperm to zona pellucida;GO:0008037//cell recognition;GO:0008150//biological_process;GO:0009566//fertilization;GO:0009605//response to external stimulus;GO:0009607//response to biotic stimulus;GO:00…	--
Unigene0002653	4	13	11	2	9	69	32	47	64	34	0.26	0.75	0.65	0.09	0.46	2.96	1.05	2.62	3.17	1.56	0.442	2.272	2.36184456	0.000278374	0.003375655	--	-	-	-	-	-	-	-	-	--
Unigene0037897	32	68	34	45	97	369	525	250	299	342	4.86	9.05	4.64	4.84	11.5	36.49	39.76	32.12	34.13	36.03	6.978	35.706	2.355281021	1.12E-09	4.33E-08	Non3	XP_045109876.1 LOW QUALITY PROTEIN: ribosome production factor 2 homolog [Portunus trituberculatus]	-	-	-	-	-	GO:0019843//rRNA binding	GO:0006364//rRNA processing	--
Unigene0024546	58	57	81	121	53	582	379	642	319	319	2.94	2.53	3.69	4.34	2.1	19.21	9.58	27.54	12.15	11.22	3.12	15.94	2.353033695	2.16E-09	7.94E-08	--	KAG0730306.1 Muscle M-line assembly protein unc-89 [Chionoecetes opilio]	-	-	-	-	-	-	-	--
Unigene0005910	7	16	12	29	6	147	137	56	44	67	0.5	1.01	0.77	1.47	0.34	6.87	4.91	3.4	2.37	3.34	0.818	4.178	2.352639744	2.74E-06	5.70E-05	--	-	-	-	-	-	-	-	-	--
Unigene0047171	5	16	23	33	37	82	65	236	136	118	0.35	0.99	1.47	1.66	2.05	3.79	2.3	14.16	7.25	5.8	1.304	6.66	2.352578308	0.000230312	0.002860285	--	XP_045134668.1 uncharacterized protein LOC123518114 isoform X2 [Portunus trituberculatus]	-	-	-	-	-	GO:0004867//serine-type endopeptidase inhibitor activity	-	--
Unigene0005155	5	5	2	14	3	30	87	19	17	40	0.75	0.66	0.27	1.48	0.35	2.92	6.49	2.4	1.91	4.15	0.702	3.574	2.347996699	0.000311675	0.003722049	--	XP_042231627.1 LOW QUALITY PROTEIN: heat shock 70 kDa protein 12A-like [Homarus americanus]	-	-	-	-	-	-	-	--
Unigene0001428	138	173	58	78	56	995	961	446	341	681	5.38	5.91	2.03	2.15	1.7	25.26	18.68	14.71	9.99	18.41	3.434	17.41	2.341954259	2.34E-07	5.96E-06	--	XP_045134280.1 uncharacterized protein LOC123517824 [Portunus trituberculatus]	-	-	-	-	GO:0005575//cellular_component;GO:0005886//plasma membrane;GO:0016020//membrane;GO:0016021//integral component of membrane;GO:0031224//intrinsic component of membrane;GO:0071944//cell periphery	-	GO:0000003//reproduction;GO:0000902//cell morphogenesis;GO:0001655//urogenital system development;GO:0001700//embryonic development via the syncytial blastoderm;GO:0001932//regulation of protein phosphorylation;GO:0001933//negative regulation of protein phosphorylation;GO:0002009//morphogenesis of an epithelium;GO:0003006//developmental process involved in reproduction;GO:0003008//system process;…	--
Unigene0043637	118	180	160	170	130	1411	1705	837	383	702	8.8	11.77	10.72	8.97	7.57	68.5	63.4	52.8	21.46	36.31	9.566	48.494	2.341818562	1.71E-10	7.49E-09	Polr2c	XP_045106923.1 DNA-directed RNA polymerase II subunit RPB3-like isoform X2 [Portunus trituberculatus]	Genetic Information Processing	Transcription	ko03020//RNA polymerase	K03011	GO:0000228//nuclear chromosome;GO:0000345//cytosolic DNA-directed RNA polymerase complex;GO:0000408//EKC/KEOPS complex;GO:0000428//DNA-directed RNA polymerase complex;GO:0000785//chromatin;GO:0005575//cellular_component;GO:0005622//intracellular anatomical structure;GO:0005634//nucleus;GO:0005654//nucleoplasm;GO:0005665//RNA polymerase II, core complex;GO:0005694//chromosome;GO:0005700//polytene …	GO:0003674//molecular_function;GO:0003676//nucleic acid binding;GO:0003677//DNA binding;GO:0003824//catalytic activity;GO:0003899//DNA-directed 5'-3' RNA polymerase activity;GO:0005488//binding;GO:0005515//protein binding;GO:0016740//transferase activity;GO:0016772//transferase activity, transferring phosphorus-containing groups;GO:0016779//nucleotidyltransferase activity;GO:0034062//5'-3' RNA po…	GO:0000375//RNA splicing, via transesterification reactions;GO:0000377//RNA splicing, via transesterification reactions with bulged adenosine as nucleophile;GO:0000398//mRNA splicing, via spliceosome;GO:0001172//transcription, RNA-templated;GO:0006139//nucleobase-containing compound metabolic process;GO:0006259//DNA metabolic process;GO:0006281//DNA repair;GO:0006283//transcription-coupled nucleo…	--
Unigene0008107	6	3	9	4	0	9	63	9	22	54	1.15	0.51	1.55	0.54	0	1.13	6.04	1.46	3.18	7.2	0.75	3.802	2.341796031	0.006577829	0.048909837	--	-	-	-	-	-	-	GO:0016757//glycosyltransferase activity	GO:0000271//polysaccharide biosynthetic process;GO:0055085//transmembrane transport	--
Unigene0042335	41	42	21	42	29	283	294	215	145	193	5.95	5.35	2.74	4.31	3.29	26.75	21.28	26.4	15.82	19.43	4.328	21.936	2.341528072	7.26E-13	4.67E-11	BRI3	XP_045134342.1 brain protein I3-like [Portunus trituberculatus]	-	-	-	-	GO:0000323//lytic vacuole;GO:0005575//cellular_component;GO:0005622//intracellular anatomical structure;GO:0005737//cytoplasm;GO:0005764//lysosome;GO:0005765//lysosomal membrane;GO:0005766//primary lysosome;GO:0005773//vacuole;GO:0005774//vacuolar membrane;GO:0005886//plasma membrane;GO:0012505//endomembrane system;GO:0012506//vesicle membrane;GO:0016020//membrane;GO:0016021//integral component o…	GO:0003674//molecular_function;GO:0005488//binding;GO:0005515//protein binding;GO:0042802//identical protein binding	GO:0001775//cell activation;GO:0002252//immune effector process;GO:0002263//cell activation involved in immune response;GO:0002274//myeloid leukocyte activation;GO:0002275//myeloid cell activation involved in immune response;GO:0002283//neutrophil activation involved in immune response;GO:0002366//leukocyte activation involved in immune response;GO:0002376//immune system process;GO:0002443//leuko…	--
Unigene0016213	468	498	449	676	404	4830	4463	2203	1782	2930	26.52	24.72	22.84	27.08	17.86	178.07	126.02	105.54	75.83	115.07	23.804	120.106	2.335032296	6.62E-18	8.31E-16	PSMD4	XP_045129147.1 26S proteasome non-ATPase regulatory subunit 4-like isoform X2 [Portunus trituberculatus]	Genetic Information Processing	Folding, sorting and degradation	ko03050//Proteasome	K03029	GO:0000502//proteasome complex;GO:0005575//cellular_component;GO:0005622//intracellular anatomical structure;GO:0005634//nucleus;GO:0005654//nucleoplasm;GO:0005737//cytoplasm;GO:0005829//cytosol;GO:0005838//proteasome regulatory particle;GO:0008540//proteasome regulatory particle, base subcomplex;GO:0008541//proteasome regulatory particle, lid subcomplex;GO:0022624//proteasome accessory complex;G…	GO:0003674//molecular_function;GO:0005198//structural molecule activity;GO:0005488//binding;GO:0005515//protein binding;GO:0008134//transcription factor binding;GO:0008270//zinc ion binding;GO:0019899//enzyme binding;GO:0031593//polyubiquitin modification-dependent protein binding;GO:0031624//ubiquitin conjugating enzyme binding;GO:0032182//ubiquitin-like protein binding;GO:0036435//K48-linked po…	GO:0000003//reproduction;GO:0000070//mitotic sister chromatid segregation;GO:0000278//mitotic cell cycle;GO:0000280//nuclear division;GO:0000819//sister chromatid segregation;GO:0006464//cellular protein modification process;GO:0006508//proteolysis;GO:0006511//ubiquitin-dependent protein catabolic process;GO:0006807//nitrogen compound metabolic process;GO:0006996//organelle organization;GO:000704…	--
Unigene0000088	109	52	100	165	76	766	861	446	411	731	2.84	1.19	2.34	3.04	1.54	12.98	11.17	9.82	8.04	13.19	2.19	11.04	2.333737397	3.97E-14	3.09E-12	--	-	-	-	-	-	-	GO:0004540//ribonuclease activity	GO:0006397//mRNA processing	--
Unigene0046238	5	4	5	1	3	24	10	20	28	32	0.58	0.4	0.52	0.08	0.27	1.8	0.58	1.95	2.43	2.56	0.37	1.864	2.332804684	0.001804504	0.016640425	--	-	-	-	-	-	-	-	-	--
Unigene0000265	156	119	83	207	131	724	1027	1404	710	324	4.74	3.17	2.26	4.45	3.11	14.32	15.55	36.07	16.2	6.82	3.546	17.792	2.326964252	5.00E-07	1.20E-05	Slc7a9	XP_045125709.1 b(0,+)-type amino acid transporter 1-like isoform X7 [Portunus trituberculatus]	-	-	-	-	GO:0005575//cellular_component;GO:0005886//plasma membrane;GO:0005887//integral component of plasma membrane;GO:0016020//membrane;GO:0016021//integral component of membrane;GO:0031224//intrinsic component of membrane;GO:0031226//intrinsic component of plasma membrane;GO:0071944//cell periphery	GO:0003674//molecular_function;GO:0005215//transporter activity;GO:0005275//amine transmembrane transporter activity;GO:0005342//organic acid transmembrane transporter activity;GO:0008509//anion transmembrane transporter activity;GO:0008514//organic anion transmembrane transporter activity;GO:0015075//ion transmembrane transporter activity;GO:0015171//amino acid transmembrane transporter activity…	GO:0003333//amino acid transmembrane transport;GO:0006810//transport;GO:0006811//ion transport;GO:0006820//anion transport;GO:0006865//amino acid transport;GO:0008150//biological_process;GO:0015711//organic anion transport;GO:0015807//L-amino acid transport;GO:0015837//amine transport;GO:0015849//organic acid transport;GO:0034220//ion transmembrane transport;GO:0046942//carboxylic acid transport;…	--
Unigene0035192	3	2	3	3	2	29	11	20	7	13	0.27	0.16	0.25	0.19	0.14	1.72	0.5	1.54	0.48	0.82	0.202	1.012	2.324782092	0.004736728	0.037276341	--	KAG0713487.1 hypothetical protein GWK47_016139 [Chionoecetes opilio]	-	-	-	-	-	-	-	--
Unigene0044063	10	6	6	8	4	78	60	30	36	21	0.51	0.27	0.27	0.29	0.16	2.58	1.52	1.29	1.37	0.74	0.3	1.5	2.321928095	4.51E-05	0.0006854	--	XP_045134412.1 LOW QUALITY PROTEIN: uncharacterized protein LOC123517974 [Portunus trituberculatus]	-	-	-	-	-	-	-	--
Unigene0002803	234	349	272	494	471	2750	3154	2920	774	1571	12.33	16.12	12.87	18.41	19.37	94.32	82.85	130.13	30.64	57.4	15.82	79.068	2.321344333	2.85E-08	8.64E-07	Fhod3	XP_045125657.1 LOW QUALITY PROTEIN: uncharacterized protein LOC123512971 [Portunus trituberculatus]	-	-	-	-	GO:0005575//cellular_component;GO:0005622//intracellular anatomical structure;GO:0005634//nucleus;GO:0005737//cytoplasm;GO:0043226//organelle;GO:0043227//membrane-bounded organelle;GO:0043229//intracellular organelle;GO:0043231//intracellular membrane-bounded organelle;GO:0048471//perinuclear region of cytoplasm	GO:0003674//molecular_function;GO:0003779//actin binding;GO:0005488//binding;GO:0005515//protein binding;GO:0008092//cytoskeletal protein binding	GO:0002009//morphogenesis of an epithelium;GO:0002011//morphogenesis of an epithelial sheet;GO:0002165//instar larval or pupal development;GO:0003008//system process;GO:0003012//muscle system process;GO:0006928//movement of cell or subcellular component;GO:0006950//response to stress;GO:0007275//multicellular organism development;GO:0007431//salivary gland development;GO:0007435//salivary gland m…	--
Unigene0026754	157	135	155	210	167	1422	1210	843	792	898	15.15	11.42	13.43	14.33	12.57	89.29	58.19	68.79	57.41	60.07	13.38	66.75	2.318689721	1.68E-22	3.26E-20	SSR3	KAG0722150.1 Translocon-associated protein subunit gamma [Chionoecetes opilio]	Genetic Information Processing	Folding, sorting and degradation	ko04141//Protein processing in endoplasmic reticulum	K13251	GO:0005575//cellular_component;GO:0005622//intracellular anatomical structure;GO:0005737//cytoplasm;GO:0005783//endoplasmic reticulum;GO:0005789//endoplasmic reticulum membrane;GO:0012505//endomembrane system;GO:0016020//membrane;GO:0016021//integral component of membrane;GO:0031224//intrinsic component of membrane;GO:0031984//organelle subcompartment;GO:0042175//nuclear outer membrane-endoplasmi…	-	GO:0006605//protein targeting;GO:0006612//protein targeting to membrane;GO:0006613//cotranslational protein targeting to membrane;GO:0006614//SRP-dependent cotranslational protein targeting to membrane;GO:0006810//transport;GO:0006886//intracellular protein transport;GO:0008104//protein localization;GO:0008150//biological_process;GO:0015031//protein transport;GO:0015833//peptide transport;GO:0033…	--
Unigene0034565	99	191	160	135	169	848	1608	584	960	883	7.72	13.05	11.2	7.44	10.28	43.01	62.47	38.49	56.21	47.71	9.938	49.578	2.318672627	1.65E-15	1.52E-13	nle1	XP_045129481.1 notchless protein homolog 1-like [Portunus trituberculatus]	-	-	-	-	GO:0005575//cellular_component;GO:0005622//intracellular anatomical structure;GO:0005634//nucleus;GO:0005730//nucleolus;GO:0005737//cytoplasm;GO:0005783//endoplasmic reticulum;GO:0005840//ribosome;GO:0005856//cytoskeleton;GO:0005884//actin filament;GO:0005938//cell cortex;GO:0015629//actin cytoskeleton;GO:0016021//integral component of membrane;GO:0030288//outer membrane-bounded periplasmic space…	GO:0003674//molecular_function;GO:0003779//actin binding;GO:0005215//transporter activity;GO:0005488//binding;GO:0005515//protein binding;GO:0008092//cytoskeletal protein binding;GO:0044877//protein-containing complex binding;GO:0051015//actin filament binding	GO:0000027//ribosomal large subunit assembly;GO:0001501//skeletal system development;GO:0001655//urogenital system development;GO:0001701//in utero embryonic development;GO:0001756//somitogenesis;GO:0001822//kidney development;GO:0001824//blastocyst development;GO:0001825//blastocyst formation;GO:0001826//inner cell mass cell differentiation;GO:0003002//regionalization;GO:0006810//transport;GO:00…	--
Unigene0005672	245	236	171	266	222	2302	1574	1107	899	1334	9.51	8.03	5.96	7.3	6.72	58.15	30.45	36.33	26.21	35.9	7.504	37.408	2.317615102	1.17E-14	9.70E-13	CREB3L4	XP_045109907.1 nucleoporin NSP1-like [Portunus trituberculatus]	-	-	-	-	GO:0000139//Golgi membrane;GO:0005575//cellular_component;GO:0005622//intracellular anatomical structure;GO:0005634//nucleus;GO:0005654//nucleoplasm;GO:0005737//cytoplasm;GO:0005783//endoplasmic reticulum;GO:0005789//endoplasmic reticulum membrane;GO:0005794//Golgi apparatus;GO:0005829//cytosol;GO:0012505//endomembrane system;GO:0016020//membrane;GO:0016021//integral component of membrane;GO:0031…	GO:0000976//transcription cis-regulatory region binding;GO:0000977//RNA polymerase II transcription regulatory region sequence-specific DNA binding;GO:0000978//RNA polymerase II cis-regulatory region sequence-specific DNA binding;GO:0000981//DNA-binding transcription factor activity, RNA polymerase II-specific;GO:0000987//cis-regulatory region sequence-specific DNA binding;GO:0001067//transcripti…	GO:0002673//regulation of acute inflammatory response;GO:0002675//positive regulation of acute inflammatory response;GO:0006139//nucleobase-containing compound metabolic process;GO:0006351//transcription, DNA-templated;GO:0006355//regulation of transcription, DNA-templated;GO:0006357//regulation of transcription by RNA polymerase II;GO:0006366//transcription by RNA polymerase II;GO:0006725//cellu…	TF_bZIP
Unigene0027556	50	76	104	115	78	568	700	371	496	503	6	7.98	11.2	9.75	7.3	44.32	41.83	37.61	44.67	41.81	8.446	42.048	2.315697029	2.43E-23	5.00E-21	esf2	XP_045125529.1 activator of basal transcription 1-like [Portunus trituberculatus]	-	-	-	-	GO:0005575//cellular_component;GO:0005622//intracellular anatomical structure;GO:0005634//nucleus;GO:0005667//transcription regulator complex;GO:0005730//nucleolus;GO:0005737//cytoplasm;GO:0030684//preribosome;GO:0030686//90S preribosome;GO:0031974//membrane-enclosed lumen;GO:0031981//nuclear lumen;GO:0032991//protein-containing complex;GO:0043226//organelle;GO:0043227//membrane-bounded organelle…	GO:0001671//ATPase activator activity;GO:0003674//molecular_function;GO:0003676//nucleic acid binding;GO:0003677//DNA binding;GO:0003712//transcription coregulator activity;GO:0003713//transcription coactivator activity;GO:0003723//RNA binding;GO:0005488//binding;GO:0008047//enzyme activator activity;GO:0030234//enzyme regulator activity;GO:0060589//nucleoside-triphosphatase regulator activity;GO…	GO:0000028//ribosomal small subunit assembly;GO:0000447//endonucleolytic cleavage in ITS1 to separate SSU-rRNA from 5.8S rRNA and LSU-rRNA from tricistronic rRNA transcript (SSU-rRNA, 5.8S rRNA, LSU-rRNA);GO:0000460//maturation of 5.8S rRNA;GO:0000462//maturation of SSU-rRNA from tricistronic rRNA transcript (SSU-rRNA, 5.8S rRNA, LSU-rRNA);GO:0000466//maturation of 5.8S rRNA from tricistronic rRN…	--
Unigene0014893	1	7	4	6	7	51	51	8	7	45	0.15	0.9	0.52	0.62	0.8	4.85	3.71	0.99	0.77	4.56	0.598	2.976	2.315157137	0.003892586	0.031618915	--	-	-	-	-	-	-	-	-	--
Unigene0003955	3	5	1	10	4	44	43	7	32	16	0.38	0.55	0.11	0.89	0.39	3.62	2.71	0.75	3.04	1.4	0.464	2.304	2.311944006	0.001843453	0.016954559	POMGNT1	XP_045104362.1 uncharacterized protein LOC123499891 [Portunus trituberculatus]	Metabolism;Metabolism	Global and overview maps;Glycan biosynthesis and metabolism	ko01100//Metabolic pathways;ko00515//Mannose type O-glycan biosynthesis	K09666;K09666	GO:0000139//Golgi membrane;GO:0005575//cellular_component;GO:0005622//intracellular anatomical structure;GO:0005737//cytoplasm;GO:0005794//Golgi apparatus;GO:0012505//endomembrane system;GO:0016020//membrane;GO:0016021//integral component of membrane;GO:0030173//integral component of Golgi membrane;GO:0031090//organelle membrane;GO:0031224//intrinsic component of membrane;GO:0031228//intrinsic co…	GO:0003674//molecular_function;GO:0003824//catalytic activity;GO:0005488//binding;GO:0008194//UDP-glycosyltransferase activity;GO:0008375//acetylglucosaminyltransferase activity;GO:0016740//transferase activity;GO:0016757//glycosyltransferase activity;GO:0016758//hexosyltransferase activity;GO:0030145//manganese ion binding;GO:0043167//ion binding;GO:0043169//cation binding;GO:0046872//metal ion …	GO:0006464//cellular protein modification process;GO:0006486//protein glycosylation;GO:0006493//protein O-linked glycosylation;GO:0006807//nitrogen compound metabolic process;GO:0008150//biological_process;GO:0008152//metabolic process;GO:0009058//biosynthetic process;GO:0009059//macromolecule biosynthetic process;GO:0009100//glycoprotein metabolic process;GO:0009101//glycoprotein biosynthetic pr…	--
Unigene0025067	59	55	31	116	47	369	682	227	243	439	2.64	2.16	1.25	3.67	1.64	10.75	15.22	8.59	8.17	13.63	2.272	11.272	2.310708777	1.03E-11	5.56E-10	Pla2g15	XP_045127585.1 phospholipase A2 group XV-like isoform X2 [Portunus trituberculatus]	Cellular Processes;Metabolism	Transport and catabolism;Lipid metabolism	ko04142//Lysosome;ko00564//Glycerophospholipid metabolism	K06129;K06129	GO:0000323//lytic vacuole;GO:0005575//cellular_component;GO:0005576//extracellular region;GO:0005615//extracellular space;GO:0005622//intracellular anatomical structure;GO:0005634//nucleus;GO:0005654//nucleoplasm;GO:0005737//cytoplasm;GO:0005764//lysosome;GO:0005773//vacuole;GO:0005783//endoplasmic reticulum;GO:0005789//endoplasmic reticulum membrane;GO:0005811//lipid droplet;GO:0012505//endomemb…	GO:0003674//molecular_function;GO:0003824//catalytic activity;GO:0004620//phospholipase activity;GO:0004622//lysophospholipase activity;GO:0004623//phospholipase A2 activity;GO:0005488//binding;GO:0005543//phospholipid binding;GO:0008080//N-acetyltransferase activity;GO:0008289//lipid binding;GO:0008374//O-acyltransferase activity;GO:0016298//lipase activity;GO:0016407//acetyltransferase activity…	GO:0006082//organic acid metabolic process;GO:0006629//lipid metabolic process;GO:0006631//fatty acid metabolic process;GO:0006638//neutral lipid metabolic process;GO:0006639//acylglycerol metabolic process;GO:0006641//triglyceride metabolic process;GO:0006643//membrane lipid metabolic process;GO:0006644//phospholipid metabolic process;GO:0006650//glycerophospholipid metabolic process;GO:0006665/…	--
Unigene0008650	29	17	22	24	30	66	283	75	279	85	6.55	3.37	4.46	3.83	5.29	9.7	31.86	14.33	47.34	13.31	4.7	23.308	2.310092554	3.48E-05	0.00054617	Ube2ql1	XP_042867930.1 ubiquitin-conjugating enzyme E2Q-like protein CG4502 [Penaeus japonicus]	Genetic Information Processing	Folding, sorting and degradation	ko04120//Ubiquitin mediated proteolysis	K10582	GO:0005575//cellular_component;GO:0005622//intracellular anatomical structure;GO:0005634//nucleus;GO:0005886//plasma membrane;GO:0016020//membrane;GO:0043226//organelle;GO:0043227//membrane-bounded organelle;GO:0043229//intracellular organelle;GO:0043231//intracellular membrane-bounded organelle;GO:0071944//cell periphery	GO:0000166//nucleotide binding;GO:0003674//molecular_function;GO:0003824//catalytic activity;GO:0004842//ubiquitin-protein transferase activity;GO:0005488//binding;GO:0005524//ATP binding;GO:0016740//transferase activity;GO:0017076//purine nucleotide binding;GO:0019787//ubiquitin-like protein transferase activity;GO:0030554//adenyl nucleotide binding;GO:0032553//ribonucleotide binding;GO:0032555/…	GO:0006464//cellular protein modification process;GO:0006807//nitrogen compound metabolic process;GO:0008150//biological_process;GO:0008152//metabolic process;GO:0009987//cellular process;GO:0016567//protein ubiquitination;GO:0019538//protein metabolic process;GO:0032446//protein modification by small protein conjugation;GO:0036211//protein modification process;GO:0043170//macromolecule metabolic…	--
Unigene0003276	7	9	6	16	8	56	69	39	50	68	0.26	0.29	0.2	0.41	0.23	1.33	1.26	1.21	1.37	1.72	0.278	1.378	2.3094191	2.58E-08	7.92E-07	--	XP_045618140.1 uncharacterized protein LOC123770358 [Procambarus clarkii]	-	-	-	-	-	-	-	--
Unigene0024338	509	595	453	791	758	5828	3966	3881	2879	2325	54.11	55.42	43.24	59.46	62.87	403.15	210.12	348.86	229.88	171.33	55.02	272.668	2.309117352	5.08E-12	2.89E-10	Tspan11	KAG0726104.1 Tetraspanin-6 [Chionoecetes opilio]	Cellular Processes	Transport and catabolism	ko04142//Lysosome	K06497	GO:0000323//lytic vacuole;GO:0005575//cellular_component;GO:0005576//extracellular region;GO:0005615//extracellular space;GO:0005622//intracellular anatomical structure;GO:0005737//cytoplasm;GO:0005764//lysosome;GO:0005765//lysosomal membrane;GO:0005766//primary lysosome;GO:0005768//endosome;GO:0005770//late endosome;GO:0005771//multivesicular body;GO:0005773//vacuole;GO:0005774//vacuolar membran…	GO:0003674//molecular_function;GO:0005488//binding;GO:0044877//protein-containing complex binding	GO:0001775//cell activation;GO:0002090//regulation of receptor internalization;GO:0002092//positive regulation of receptor internalization;GO:0002252//immune effector process;GO:0002263//cell activation involved in immune response;GO:0002274//myeloid leukocyte activation;GO:0002275//myeloid cell activation involved in immune response;GO:0002283//neutrophil activation involved in immune response;G…	--
Unigene0038237	4	3	1	9	2	28	31	21	9	26	0.46	0.3	0.1	0.73	0.18	2.1	1.78	2.04	0.78	2.07	0.354	1.754	2.308827482	0.001058373	0.01058221	--	-	-	-	-	-	-	-	-	--
Unigene0018747	5	1	0	10	3	36	20	14	10	33	0.72	0.13	0	1.02	0.34	3.39	1.44	1.71	1.09	3.31	0.442	2.188	2.307494463	0.005457989	0.041984688	--	XP_042855502.1 zinc finger BED domain-containing protein 4-like [Penaeus japonicus]	-	-	-	-	-	-	-	--
Unigene0047202	67	80	104	157	132	1019	848	493	362	614	5.85	6.12	8.16	9.7	9	57.91	36.91	36.41	23.75	37.17	7.766	38.43	2.306989364	2.69E-12	1.61E-10	Sec13	XP_045132962.1 protein SEC13 homolog [Portunus trituberculatus]	Genetic Information Processing;Genetic Information Processing;Environmental Information Processing	Folding, sorting and degradation;Translation;Signal transduction	ko04141//Protein processing in endoplasmic reticulum;ko03013//Nucleocytoplasmic transport;ko04150//mTOR signaling pathway	K14004;K14004;K14004	-	GO:0005515//protein binding	-	--
Unigene0041896	25	46	43	85	41	245	331	164	256	453	2.95	4.75	4.55	7.08	3.77	18.79	19.44	16.34	22.66	37.01	4.62	22.848	2.306103128	1.20E-11	6.38E-10	PEX2	XP_045133091.1 peroxisome biogenesis factor 2-like [Portunus trituberculatus]	Cellular Processes	Transport and catabolism	ko04146//Peroxisome	K06664	GO:0000151//ubiquitin ligase complex;GO:0000152//nuclear ubiquitin ligase complex;GO:0000428//DNA-directed RNA polymerase complex;GO:0005575//cellular_component;GO:0005622//intracellular anatomical structure;GO:0005634//nucleus;GO:0005654//nucleoplasm;GO:0005737//cytoplasm;GO:0005777//peroxisome;GO:0005778//peroxisomal membrane;GO:0005779//integral component of peroxisomal membrane;GO:0005829//cy…	GO:0003674//molecular_function;GO:0003824//catalytic activity;GO:0004842//ubiquitin-protein transferase activity;GO:0005488//binding;GO:0008270//zinc ion binding;GO:0016740//transferase activity;GO:0019787//ubiquitin-like protein transferase activity;GO:0043167//ion binding;GO:0043169//cation binding;GO:0046872//metal ion binding;GO:0046914//transition metal ion binding;GO:0061630//ubiquitin prot…	GO:0000003//reproduction;GO:0000038//very long-chain fatty acid metabolic process;GO:0000122//negative regulation of transcription by RNA polymerase II;GO:0000209//protein polyubiquitination;GO:0000280//nuclear division;GO:0000910//cytokinesis;GO:0001764//neuron migration;GO:0003006//developmental process involved in reproduction;GO:0006082//organic acid metabolic process;GO:0006355//regulation o…	--
Unigene0007832	120	72	142	166	145	772	910	749	791	709	3.57	1.87	3.79	3.49	3.36	14.93	13.48	18.82	17.66	14.6	3.216	15.898	2.305505971	5.12E-16	5.11E-14	--	KAG0727112.1 Histone-lysine N-methyltransferase SMYD3 [Chionoecetes opilio]	Metabolism;Metabolism	Global and overview maps;Amino acid metabolism	ko01100//Metabolic pathways;ko00310//Lysine degradation	K11426;K11426	GO:0005575//cellular_component	GO:0003674//molecular_function;GO:0005488//binding;GO:0005515//protein binding;GO:0008270//zinc ion binding;GO:0043167//ion binding;GO:0043169//cation binding;GO:0046872//metal ion binding;GO:0046914//transition metal ion binding	-	--
Unigene0001264	62	19	37	61	18	296	321	268	126	231	4.44	1.19	2.38	3.09	1.01	13.8	11.46	16.24	6.78	11.47	2.422	11.95	2.302739848	3.29E-07	8.15E-06	--	-	-	-	-	-	-	-	-	--
Unigene0037438	223	224	216	227	141	1948	2286	420	1516	650	12.91	11.37	11.23	9.3	6.37	73.4	65.97	20.56	65.94	26.09	10.236	50.392	2.299542664	1.52E-07	4.04E-06	eral1	XP_045118350.1 GTPase Era, mitochondrial-like [Portunus trituberculatus]	-	-	-	-	GO:0000922//spindle pole;GO:0005575//cellular_component;GO:0005622//intracellular anatomical structure;GO:0005634//nucleus;GO:0005654//nucleoplasm;GO:0005730//nucleolus;GO:0005737//cytoplasm;GO:0005819//spindle;GO:0005829//cytosol;GO:0005856//cytoskeleton;GO:0015630//microtubule cytoskeleton;GO:0030684//preribosome;GO:0030687//preribosome, large subunit precursor;GO:0031974//membrane-enclosed lum…	GO:0003674//molecular_function;GO:0003676//nucleic acid binding;GO:0003723//RNA binding;GO:0003924//GTPase activity;GO:0005085//guanyl-nucleotide exchange factor activity;GO:0005488//binding;GO:0005515//protein binding;GO:0005525//GTP binding;GO:0008017//microtubule binding;GO:0008092//cytoskeletal protein binding;GO:0015631//tubulin binding;GO:0019001//guanyl nucleotide binding;GO:0019843//rRNA …	GO:0000226//microtubule cytoskeleton organization;GO:0000278//mitotic cell cycle;GO:0001501//skeletal system development;GO:0001503//ossification;GO:0001701//in utero embryonic development;GO:0001824//blastocyst development;GO:0001832//blastocyst growth;GO:0001833//inner cell mass cell proliferation;GO:0002376//immune system process;GO:0002520//immune system development;GO:0006139//nucleobase-con…	--
Unigene0021815	41	26	17	57	38	243	339	226	99	203	5.02	2.79	1.87	4.93	3.63	19.34	20.67	23.38	9.1	17.22	3.648	17.942	2.298163082	9.35E-09	3.10E-07	--	XP_037773894.1 uncharacterized protein LOC119570066 [Penaeus monodon]	-	-	-	-	-	-	-	--
Unigene0036036	5	3	7	0	1	19	37	20	19	15	0.94	0.49	1.18	0	0.15	2.31	3.45	3.17	2.67	1.95	0.552	2.71	2.295552679	0.002619042	0.022732564	--	-	-	-	-	-	-	-	-	--
Unigene0007253	34	56	42	77	47	290	622	168	249	306	2.46	3.54	2.72	3.93	2.65	13.63	22.39	10.26	13.51	15.32	3.06	15.022	2.295473345	5.27E-14	4.04E-12	EIF2AK1	XP_045130946.1 eukaryotic translation initiation factor 2-alpha kinase 3-like [Portunus trituberculatus]	Genetic Information Processing	Folding, sorting and degradation	ko04141//Protein processing in endoplasmic reticulum	K16194	-	GO:0004672//protein kinase activity;GO:0005524//ATP binding	GO:0006468//protein phosphorylation	--
Unigene0016435	65	91	56	65	160	395	267	1001	482	284	15.9	19.51	12.3	11.25	30.55	62.89	32.56	207.1	88.58	48.17	17.902	87.86	2.295085726	0.0001329	0.001775441	--	ACF25907.1 crustin-1 [Eriocheir sinensis]	-	-	-	-	GO:0005576//extracellular region	GO:0030414//peptidase inhibitor activity	-	--
Unigene0035024	4	16	8	13	27	59	64	68	157	38	0.91	3.18	1.63	2.08	4.77	8.7	7.23	13.03	26.73	5.97	2.514	12.332	2.29435024	0.000655964	0.007049334	--	-	-	-	-	-	-	-	-	--
Unigene0042226	2	2	10	2	7	28	18	28	16	48	0.6	0.52	2.68	0.42	1.63	5.43	2.68	7.06	3.58	9.92	1.17	5.734	2.293033375	0.003040877	0.025713499	--	-	-	-	-	-	GO:0016021//integral component of membrane	GO:0016765//transferase activity, transferring alkyl or aryl (other than methyl) groups;GO:0048472//threonine-phosphate decarboxylase activity	GO:0009236//cobalamin biosynthetic process	--
Unigene0002618	8	9	14	2	11	67	149	18	22	56	1.15	1.14	1.81	0.2	1.24	6.28	10.7	2.19	2.38	5.59	1.108	5.428	2.292462839	0.001108734	0.011001242	--	-	-	-	-	-	-	-	-	--
Unigene0016125	5	3	5	1	5	19	28	19	15	40	0.52	0.27	0.46	0.07	0.4	1.28	1.44	1.66	1.17	2.87	0.344	1.684	2.291411668	0.000872836	0.008989401	--	XP_045115917.1 zinc transporter 10-like isoform X1 [Portunus trituberculatus]	-	-	-	-	GO:0005575//cellular_component;GO:0005672//transcription factor TFIIA complex;GO:0005886//plasma membrane;GO:0016020//membrane;GO:0016021//integral component of membrane;GO:0016323//basolateral plasma membrane;GO:0031224//intrinsic component of membrane;GO:0071944//cell periphery;GO:0098590//plasma membrane region	GO:0003674//molecular_function;GO:0005215//transporter activity;GO:0005385//zinc ion transmembrane transporter activity;GO:0008324//cation transmembrane transporter activity;GO:0015075//ion transmembrane transporter activity;GO:0015318//inorganic molecular entity transmembrane transporter activity;GO:0015562//efflux transmembrane transporter activity;GO:0022857//transmembrane transporter activity…	GO:0000041//transition metal ion transport;GO:0006367//transcription initiation from RNA polymerase II promoter;GO:0006810//transport;GO:0006811//ion transport;GO:0006812//cation transport;GO:0006829//zinc ion transport;GO:0006950//response to stress;GO:0008150//biological_process;GO:0009636//response to toxic substance;GO:0010035//response to inorganic substance;GO:0010038//response to metal ion…	--
Unigene0009528	3	3	10	9	9	57	38	48	23	35	0.16	0.14	0.47	0.33	0.37	1.93	0.99	2.11	0.9	1.26	0.294	1.438	2.290175616	0.000101633	0.001397164	--	XP_045136820.1 geranylgeranyl pyrophosphate synthase-like [Portunus trituberculatus]	Metabolism;Metabolism	Global and overview maps;Metabolism of terpenoids and polyketides	ko01100//Metabolic pathways;ko00900//Terpenoid backbone biosynthesis	K00804;K00804	-	-	-	--
Unigene0012107	5	22	13	11	6	77	85	54	65	71	0.2	0.75	0.46	0.3	0.18	1.96	1.66	1.79	1.91	1.92	0.378	1.848	2.289506617	3.16E-07	7.84E-06	--	KAG0723475.1 hypothetical protein GWK47_042668 [Chionoecetes opilio]	-	-	-	-	-	-	-	--
Unigene0021842	90	109	73	103	178	835	1056	459	418	697	6.02	6.39	4.39	4.87	9.29	36.35	35.21	25.96	21	32.32	6.192	30.168	2.284541679	4.96E-11	2.39E-09	CTH	KAG0730139.1 Cystathionine gamma-lyase [Chionoecetes opilio]	Metabolism;Metabolism;Metabolism;Metabolism;Metabolism	Global and overview maps;Global and overview maps;Amino acid metabolism;Amino acid metabolism;Metabolism of other amino acids	ko01100//Metabolic pathways;ko01230//Biosynthesis of amino acids;ko00270//Cysteine and methionine metabolism;ko00260//Glycine, serine and threonine metabolism;ko00450//Selenocompound metabolism	K01758;K01758;K01758;K01758;K01758	GO:0005737//cytoplasm;GO:0043240//Fanconi anaemia nuclear complex	GO:0003824//catalytic activity;GO:0003961//O-acetylhomoserine aminocarboxypropyltransferase activity;GO:0004121//cystathionine beta-lyase activity;GO:0004124//cysteine synthase activity;GO:0004400//histidinol-phosphate transaminase activity;GO:0016765//transferase activity, transferring alkyl or aryl (other than methyl) groups;GO:0016835//carbon-oxygen lyase activity;GO:0018826//methionine gamma-…	GO:0000105//histidine biosynthetic process;GO:0008652//cellular amino acid biosynthetic process;GO:0009058//biosynthetic process;GO:0009086//methionine biosynthetic process;GO:0009087//methionine catabolic process;GO:0009093//cysteine catabolic process;GO:0009236//cobalamin biosynthetic process;GO:0019344//cysteine biosynthetic process;GO:0019346//transsulfuration;GO:0019413//acetate biosynthetic…	--
Unigene0023035	20	34	52	62	31	292	228	255	153	241	1.15	1.71	2.68	2.52	1.39	10.91	6.53	12.38	6.6	9.59	1.89	9.202	2.283561222	2.70E-10	1.14E-08	Pgp	XP_045130645.1 LOW QUALITY PROTEIN: glycerol-3-phosphate phosphatase-like [Portunus trituberculatus]	Metabolism;Metabolism;Metabolism	Global and overview maps;Global and overview maps;Carbohydrate metabolism	ko01100//Metabolic pathways;ko01200//Carbon metabolism;ko00630//Glyoxylate and dicarboxylate metabolism	K19269;K19269;K19269	-	GO:0004401//histidinol-phosphatase activity;GO:0008962//phosphatidylglycerophosphatase activity;GO:0008967//phosphoglycolate phosphatase activity;GO:0016787//hydrolase activity	GO:0000105//histidine biosynthetic process;GO:0008152//metabolic process;GO:0009853//photorespiration;GO:0015671//oxygen transport	--
Unigene0026937	48	52	41	76	43	475	665	152	234	164	2.07	1.97	1.59	2.32	1.45	13.36	14.32	5.56	7.6	4.91	1.88	9.15	2.283039081	2.48E-08	7.63E-07	Tbl3	XP_045126011.1 LOW QUALITY PROTEIN: transducin beta-like protein 3 [Portunus trituberculatus]	Genetic Information Processing	Translation	ko03008//Ribosome biogenesis in eukaryotes	K14555	GO:0005575//cellular_component;GO:0005622//intracellular anatomical structure;GO:0005634//nucleus;GO:0005654//nucleoplasm;GO:0005730//nucleolus;GO:0030684//preribosome;GO:0030686//90S preribosome;GO:0031974//membrane-enclosed lumen;GO:0031981//nuclear lumen;GO:0032040//small-subunit processome;GO:0032991//protein-containing complex;GO:0034388//Pwp2p-containing subcomplex of 90S preribosome;GO:004…	GO:0003674//molecular_function;GO:0003676//nucleic acid binding;GO:0003723//RNA binding;GO:0005488//binding;GO:0005515//protein binding;GO:0030515//snoRNA binding;GO:0097159//organic cyclic compound binding;GO:1901363//heterocyclic compound binding	GO:0000447//endonucleolytic cleavage in ITS1 to separate SSU-rRNA from 5.8S rRNA and LSU-rRNA from tricistronic rRNA transcript (SSU-rRNA, 5.8S rRNA, LSU-rRNA);GO:0000460//maturation of 5.8S rRNA;GO:0000462//maturation of SSU-rRNA from tricistronic rRNA transcript (SSU-rRNA, 5.8S rRNA, LSU-rRNA);GO:0000466//maturation of 5.8S rRNA from tricistronic rRNA transcript (SSU-rRNA, 5.8S rRNA, LSU-rRNA);…	--
Unigene0041822	68	113	74	149	94	637	1146	418	282	655	1.54	2.24	1.5	2.38	1.66	9.37	12.92	7.99	4.79	10.27	1.864	9.068	2.282382531	8.83E-13	5.64E-11	TSNARE1	XP_045101000.1 syntaxin-7-like isoform X3 [Portunus trituberculatus]	Cellular Processes	Transport and catabolism	ko04145//Phagosome	K13813	GO:0005730//nucleolus;GO:0016020//membrane	GO:0003677//DNA binding;GO:0008134//transcription factor binding	GO:0006355//regulation of transcription, DNA-templated	--
Unigene0001477	3	8	7	8	10	54	69	29	19	52	0.24	0.56	0.5	0.45	0.62	2.8	2.74	1.96	1.14	2.88	0.474	2.304	2.281181753	2.26E-05	0.00037511	--	-	-	-	-	-	-	-	-	--
Unigene0016175	8	15	21	18	19	112	130	73	90	89	0.61	1	1.43	0.97	1.13	5.54	4.92	4.69	5.14	4.69	1.028	4.996	2.280933212	8.07E-11	3.75E-09	--	-	-	-	-	-	-	-	-	--
Unigene0038846	4	4	10	3	3	23	52	24	37	18	0.43	0.38	0.97	0.23	0.25	1.62	2.8	2.2	3.01	1.35	0.452	2.196	2.280483377	0.000357455	0.004200118	--	-	-	-	-	-	-	-	-	--
Unigene0034852	70	36	34	54	40	326	318	348	266	165	9.67	4.36	4.22	5.28	4.31	29.31	21.89	40.65	27.6	15.8	5.568	27.05	2.280397478	1.68E-08	5.29E-07	--	-	-	-	-	-	-	-	-	--
Unigene0036291	59	26	13	58	44	680	149	210	72	101	2.18	0.84	0.43	1.52	1.27	16.37	2.75	6.57	2	2.59	1.248	6.056	2.278747271	0.001038742	0.010415924	mov10b.1	XP_042224254.1 putative helicase mov-10-B.1 isoform X2 [Homarus americanus]	-	-	-	-	GO:0009338//exodeoxyribonuclease V complex;GO:0016021//integral component of membrane	GO:0003677//DNA binding;GO:0003678//DNA helicase activity;GO:0004383//guanylate cyclase activity;GO:0004386//helicase activity;GO:0005524//ATP binding;GO:0008854//exodeoxyribonuclease V activity;GO:0016787//hydrolase activity	GO:0006182//cGMP biosynthetic process;GO:0006281//DNA repair;GO:0006310//DNA recombination;GO:0009847//spore germination	--
Unigene0000122	49	79	69	98	64	408	549	325	349	541	2.7	3.82	3.42	3.82	2.76	14.65	15.1	15.17	14.47	20.7	3.304	16.018	2.277408433	1.20E-26	3.33E-24	fand	XP_045126725.1 pre-mRNA-splicing factor syf1 homolog [Portunus trituberculatus]	Genetic Information Processing	Transcription	ko03040//Spliceosome	K12867	GO:0000974//Prp19 complex;GO:0005575//cellular_component;GO:0005622//intracellular anatomical structure;GO:0005634//nucleus;GO:0005654//nucleoplasm;GO:0005681//spliceosomal complex;GO:0005684//U2-type spliceosomal complex;GO:0005737//cytoplasm;GO:0005829//cytosol;GO:0031974//membrane-enclosed lumen;GO:0031981//nuclear lumen;GO:0032991//protein-containing complex;GO:0043226//organelle;GO:0043227//…	GO:0003674//molecular_function;GO:0005488//binding;GO:0005515//protein binding	GO:0000349//generation of catalytic spliceosome for first transesterification step;GO:0000375//RNA splicing, via transesterification reactions;GO:0000377//RNA splicing, via transesterification reactions with bulged adenosine as nucleophile;GO:0000393//spliceosomal conformational changes to generate catalytic conformation;GO:0000398//mRNA splicing, via spliceosome;GO:0001655//urogenital system dev…	--
Unigene0013275	12	3	1	18	4	43	110	35	17	39	1.68	0.37	0.13	1.78	0.44	3.92	7.68	4.14	1.79	3.79	0.88	4.264	2.276632009	0.001321029	0.012731637	--	-	-	-	-	-	-	GO:0005524//ATP binding	GO:0007059//chromosome segregation;GO:0030261//chromosome condensation	--
[truncated: 3,196 more rows]
