# Supplementary material
Source: MDPI journal article supplement (https://www.mdpi.com/2410-3888/9/3/92)
Supplement: s1 [file s1 › table S3.xlsx]

## Sheet: table
Table S3 Sample correlation between the thermal stress group (35 °C) and the control group (25 °C)
Sample	CG1	CG2	CG3	CG4	CG5	TSG1	TSG2	TSG3	TSG4	TSG5
CG1	1	0.981481711805163	0.983611014432892	0.968534757661637	0.978875083195957	0.942555422955656	0.91172398752158	0.93203669011367	0.493346204173638	0.938725155358095
CG2	0.981481711805163	1	0.987190828730054	0.976663125660485	0.970384089904519	0.924803769096658	0.905428854062259	0.918533687162797	0.572820567783058	0.916640716946733
CG3	0.983611014432892	0.987190828730054	1	0.983270398120889	0.975156239010504	0.933886898294306	0.901762178260857	0.930223062292397	0.588320290522997	0.927597846926154
CG4	0.968534757661637	0.976663125660485	0.983270398120889	1	0.983876023453859	0.935214228560229	0.921079752406264	0.931360887014239	0.615737149757158	0.94717726656332
CG5	0.978875083195957	0.970384089904519	0.975156239010504	0.983876023453859	1	0.932375376035767	0.920287540071322	0.932249736491009	0.561933706603036	0.960986818857125
TSG1	0.942555422955656	0.924803769096658	0.933886898294306	0.935214228560229	0.932375376035767	1	0.982323447076697	0.986846361677509	0.65517603446734	0.973422740146941
TSG2	0.91172398752158	0.905428854062259	0.901762178260857	0.921079752406264	0.920287540071322	0.982323447076697	1	0.976547991368997	0.698889498905083	0.974448313779855
TSG3	0.93203669011367	0.918533687162797	0.930223062292397	0.931360887014239	0.932249736491009	0.986846361677509	0.976547991368997	1	0.677181061411523	0.975073313987643
TSG4	0.493346204173638	0.572820567783058	0.588320290522997	0.615737149757158	0.561933706603036	0.65517603446734	0.698889498905083	0.677181061411523	1	0.643998472955666
TSG5	0.938725155358095	0.916640716946733	0.927597846926154	0.94717726656332	0.960986818857125	0.973422740146941	0.974448313779855	0.975073313987643	0.643998472955666	1
