# Supplementary material
Source: MDPI journal article supplement (https://www.mdpi.com/2410-3888/9/3/92)

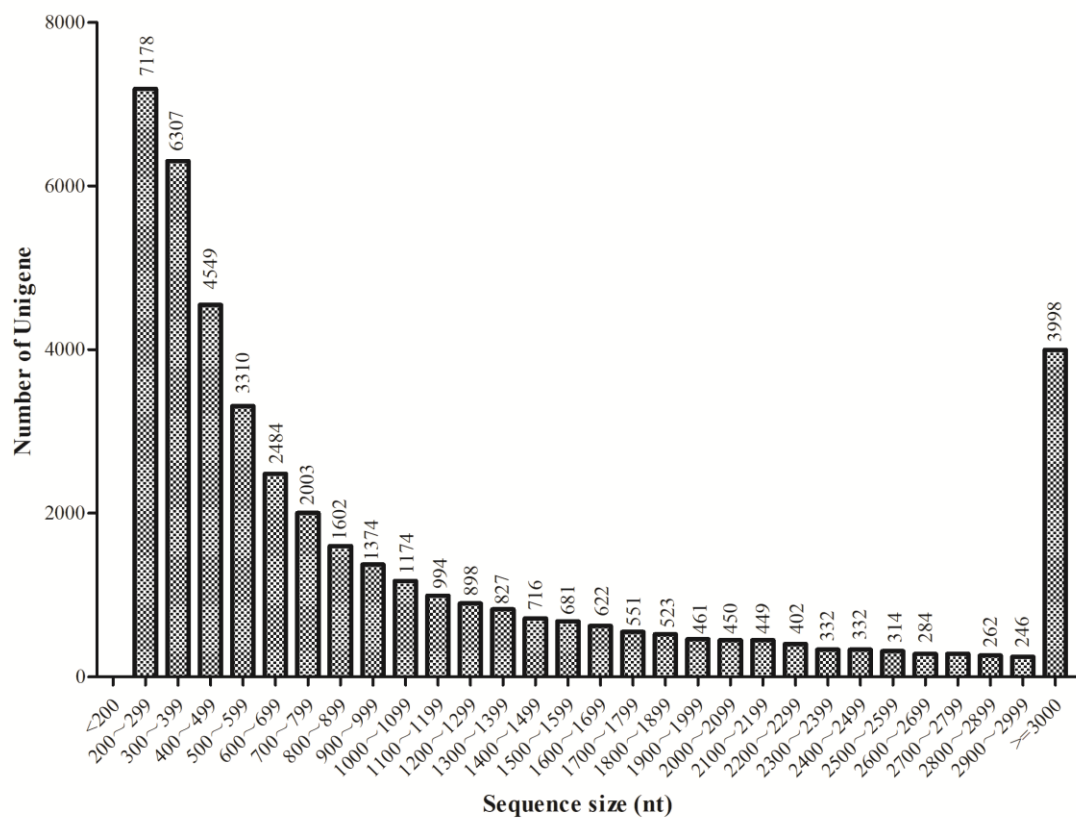

**Figure S1.** Length distribution of the assembled unigenes.

Supplement: s1 [file s1]
